# Supplementary material for: Antibiotic exposure perturbs the gut microbiota and elevates mortality in honeybees
Source: PubMed Central journal article supplement (PMC5349420; doi:10.1371/journal.pbio.2001861), 2017-03-14

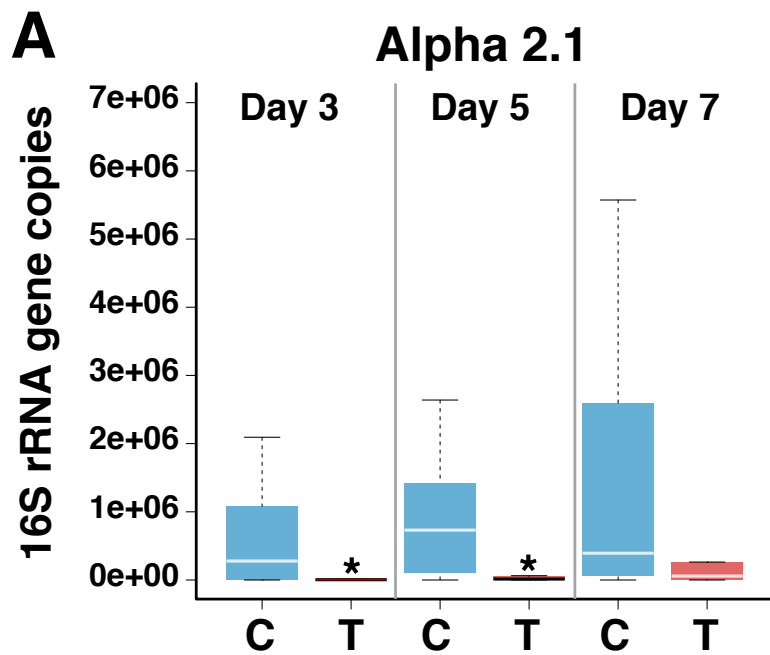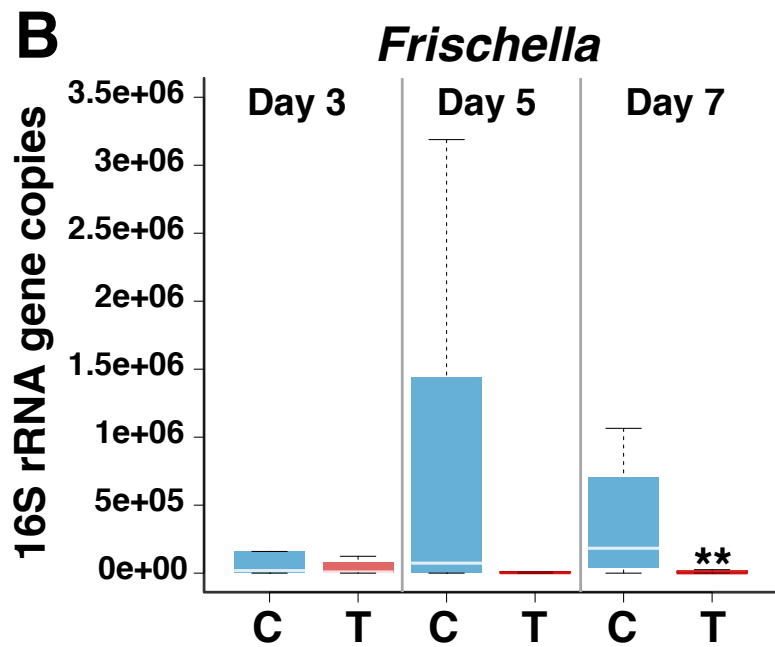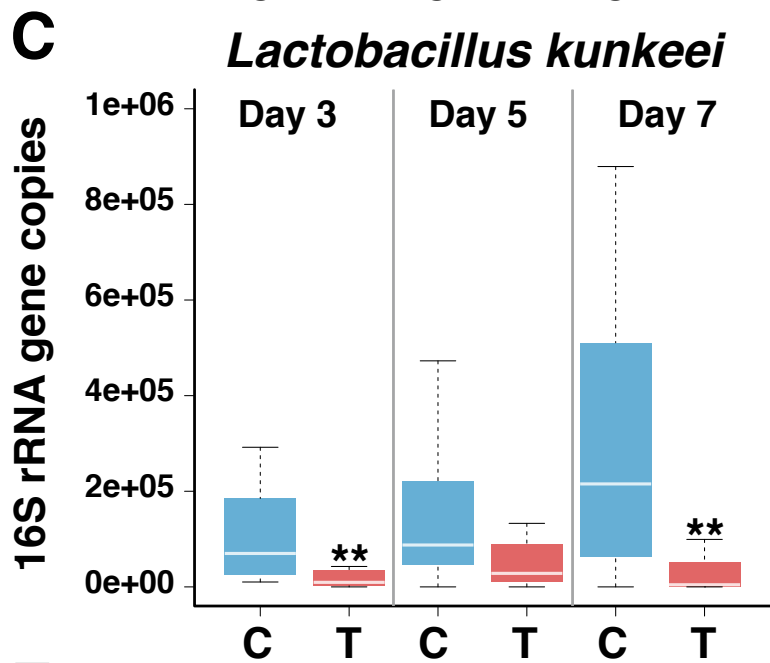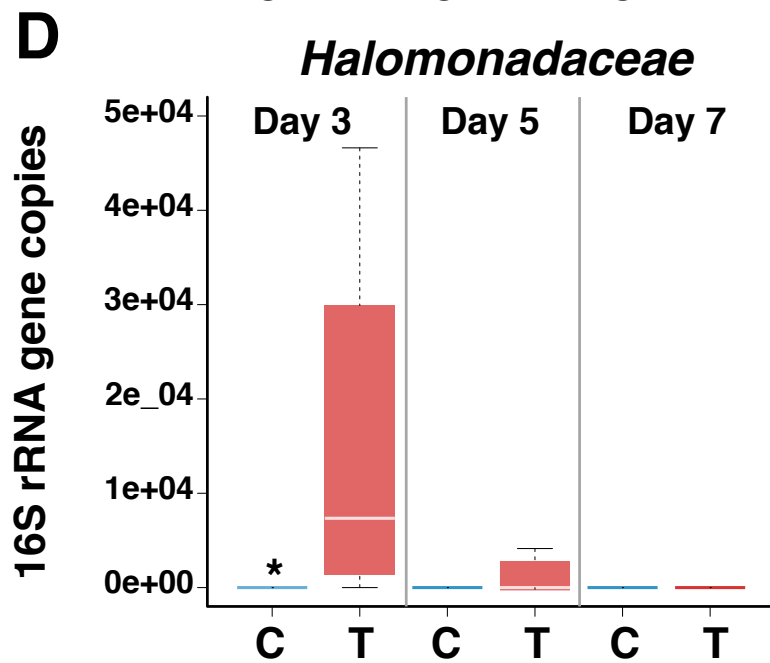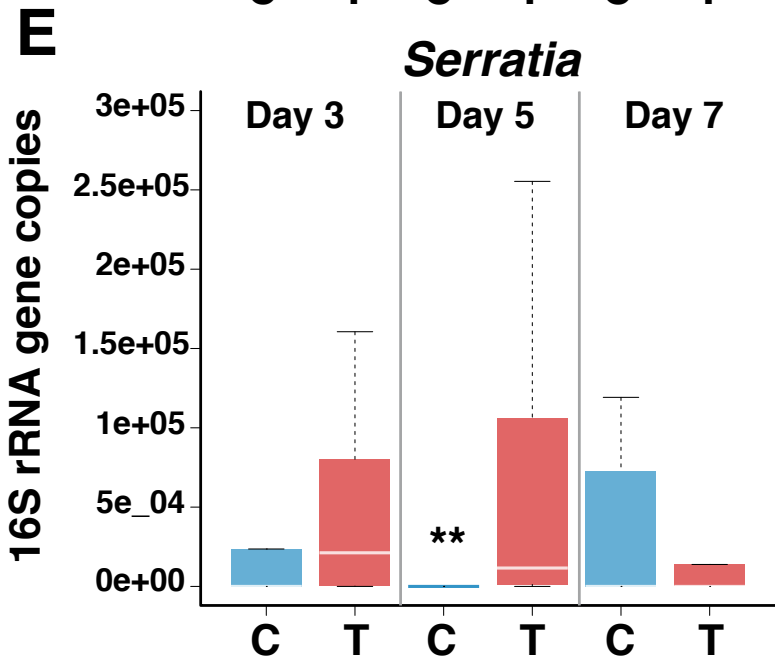

Supplement: pbio.2001861.s004.pdf [file pbio.2001861.s004.pdf]
