# Supplementary material for: Antibiotic exposure perturbs the gut microbiota and elevates mortality in honeybees
Source: PubMed Central journal article supplement (PMC5349420; doi:10.1371/journal.pbio.2001861), 2017-03-14

**A****Lab sterile recovery**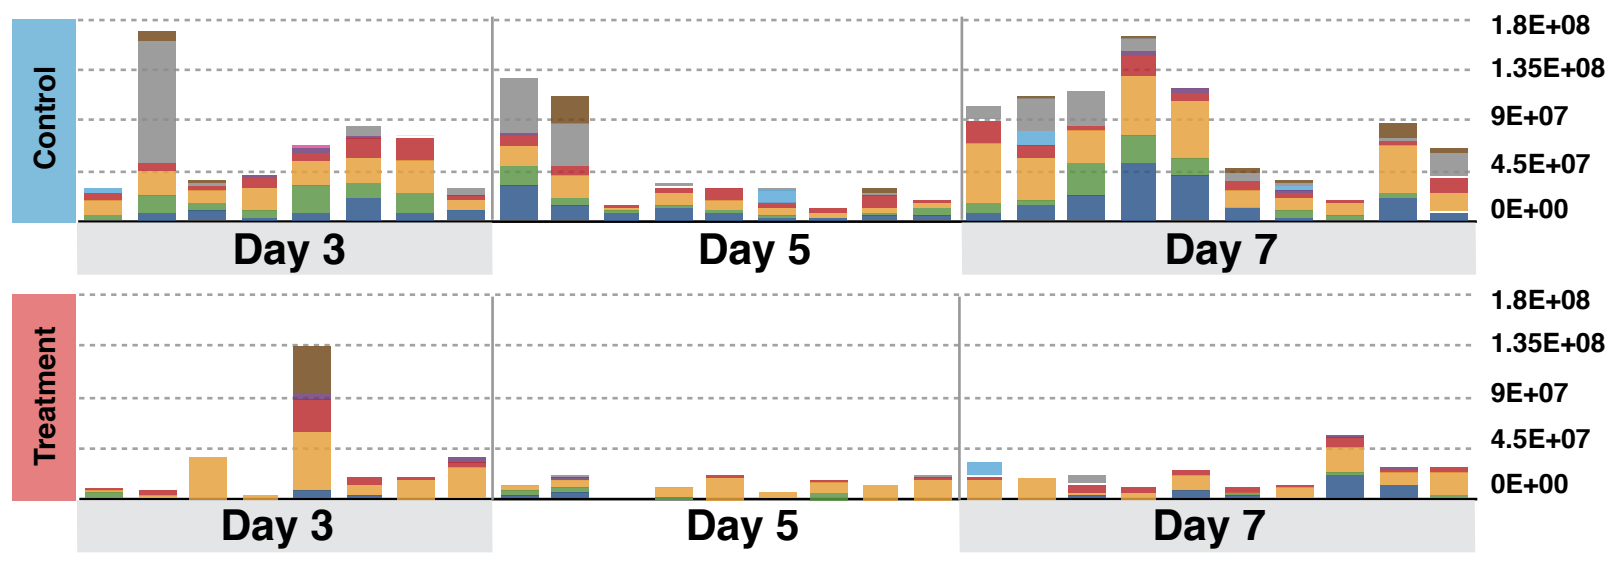

- *Gilliamella*
- *Snodgrassella*
- Firm-5
- *Bifidobacterium*
- Firm-4
- *Frischella*
- *Bartonella*
- Alpha 2.1
- Other bacteria

**All bacteria**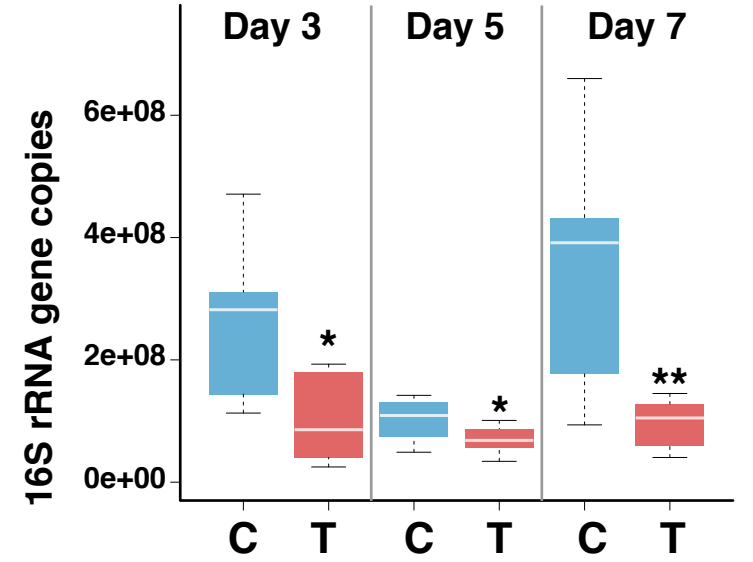**B****Lab exposed recovery**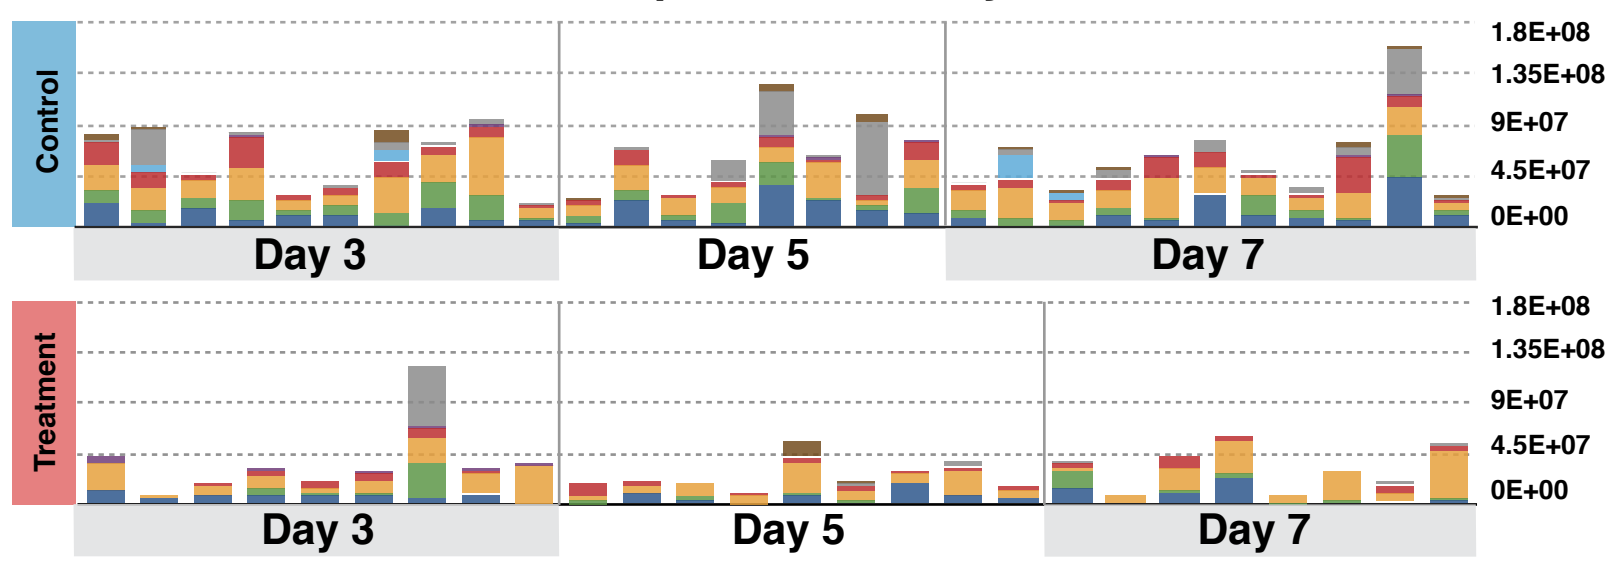**All bacteria**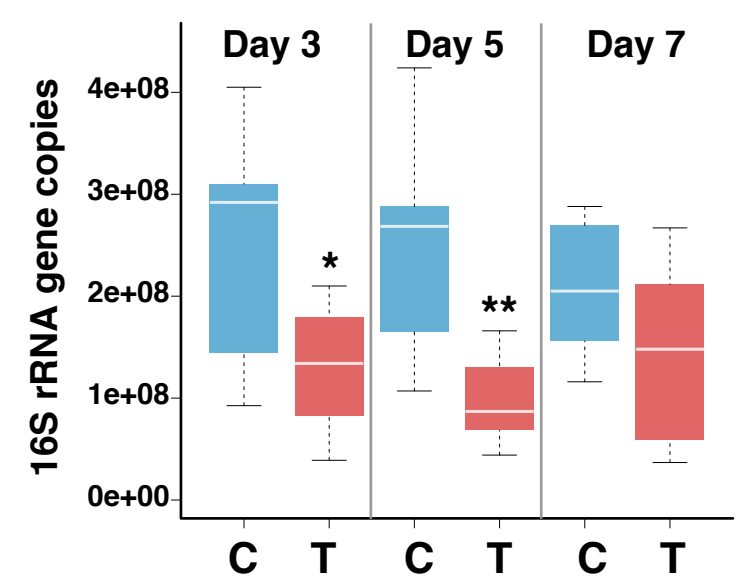

Supplement: pbio.2001861.s005.pdf [file pbio.2001861.s005.pdf]
