# Supplementary material for: Antibiotic exposure perturbs the gut microbiota and elevates mortality in honeybees
Source: PubMed Central journal article supplement (PMC5349420; doi:10.1371/journal.pbio.2001861), 2017-03-14
Supplement: pbio.2001861.s006.pdf [file pbio.2001861.s006.pdf]

**A**

# PCR with universal fungal primers

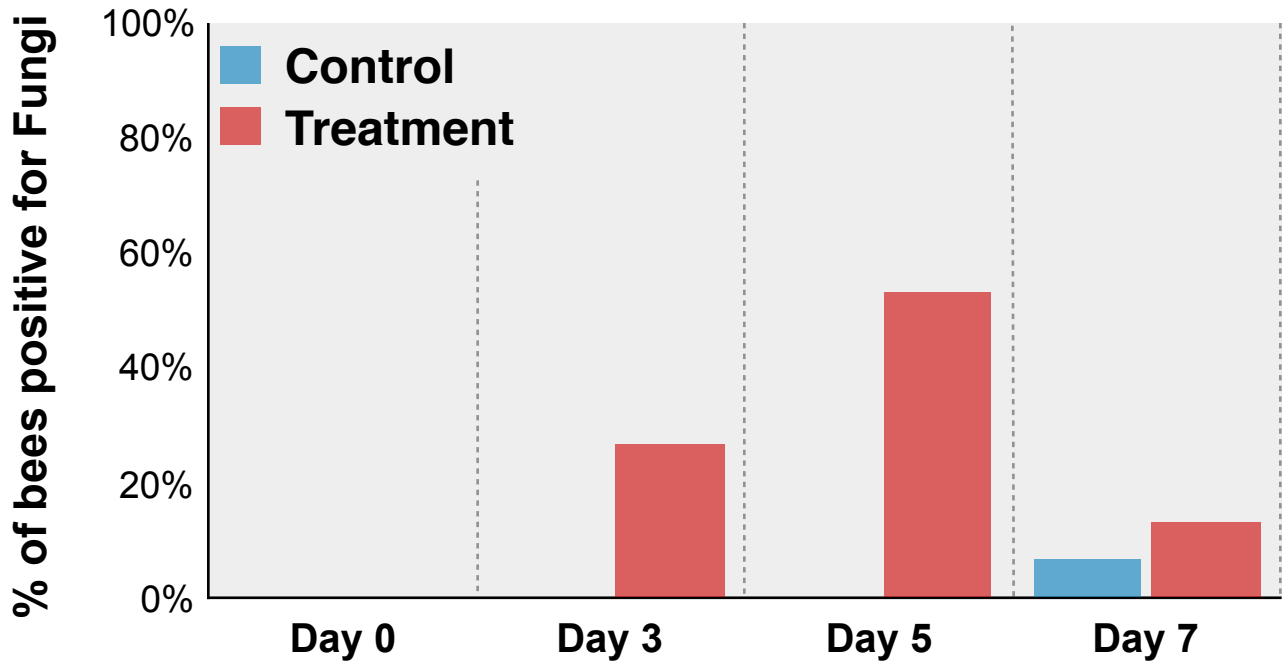**B**

| Clones   | Sample                 | Species*                         | Kingdom |
|----------|------------------------|----------------------------------|---------|
| T2 D3 1  | Treatment bee 2 day 3  | <i>Metschnikowia koreensis</i>   | Fungi   |
| T2 D3 2  | Treatment bee 2 day 3  | <i>Metschnikowia koreensis</i>   | Fungi   |
| T2 D3 3  | Treatment bee 2 day 3  | <i>Metschnikowia koreensis</i>   | Fungi   |
| T2 D3 1  | Treatment bee 2 day 3  | <i>Metschnikowia koreensis</i>   | Fungi   |
| T6 D3 1  | Treatment bee 6 day 3  | <i>Lachancea thermotolerans</i>  | Fungi   |
| T3 D5 1  | Treatment bee 3 day 5  | <i>Starmerella meliponinorum</i> | Fungi   |
| T10 D5 1 | Treatment bee 10 day 5 | <i>Nothoscordum bivalve</i>      | Plantae |
| T10-D5 2 | Treatment bee 10 day 5 | <i>Nothoscordum texanum</i>      | Plantae |
| T13 D5 1 | Treatment bee 13 day 5 | <i>Metschnikowia koreensis</i>   | Fungi   |
| T1 D7 1  | Treatment bee 1 day 7  | <i>Elaeagnus macrophylla</i>     | Plantae |
| C1 D7 1  | Control bee 1 day 7    | <i>Nothoscordum bivalve</i>      | Plantae |
| C1 D7 2  | Control bee 1 day 7    | <i>Nothoscordum bivalve</i>      | Plantae |
| C1 D7 3  | Control bee 1 day 7    | <i>Nothoscordum bivalve</i>      | Plantae |
| C1 D7 4  | Control bee 1 day 7    | <i>Nothoscordum bivalve</i>      | Plantae |
| C1 D7 5  | Control bee 1 day 7    | <i>Nothoscordum bivalve</i>      | Plantae |
| C1 D7 6  | Control bee 1 day 7    | <i>Nothoscordum bivalve</i>      | Plantae |
| C1 D7 7  | Control bee 1 day 7    | <i>Nothoscordum bivalve</i>      | Plantae |

\* signifies >97% sequence identity to the given species
