# Supplementary material for: Antibiotic exposure perturbs the gut microbiota and elevates mortality in honeybees
Source: PubMed Central journal article supplement (PMC5349420; doi:10.1371/journal.pbio.2001861), 2017-03-14
Supplement: pbio.2001861.s007.pdf [file pbio.2001861.s007.pdf]

**Control D3**

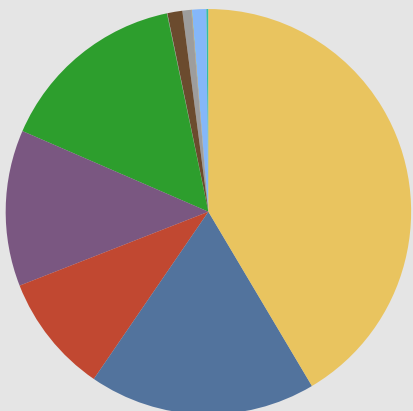

**Control D5**

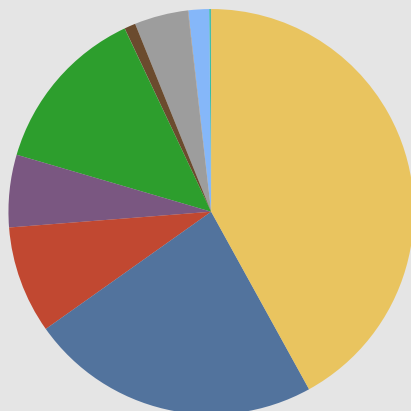

**Control D7**

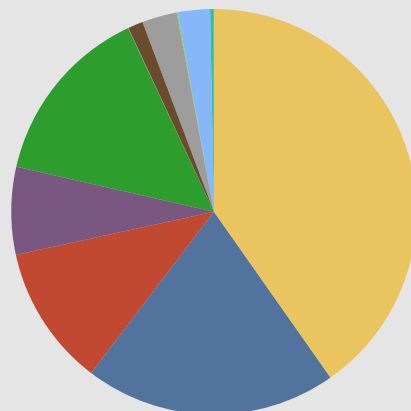

**Treatment D3**

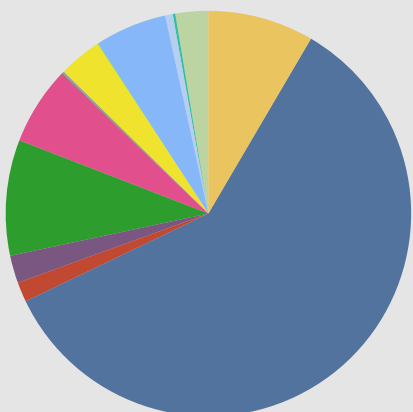

**Treatment D5**

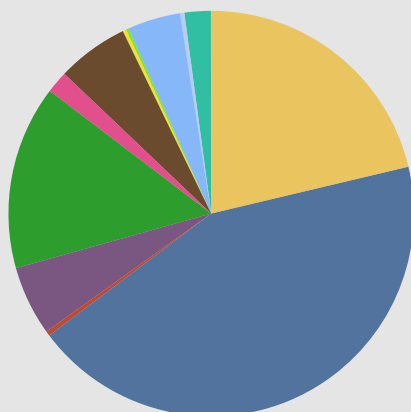

**Treatment D7**

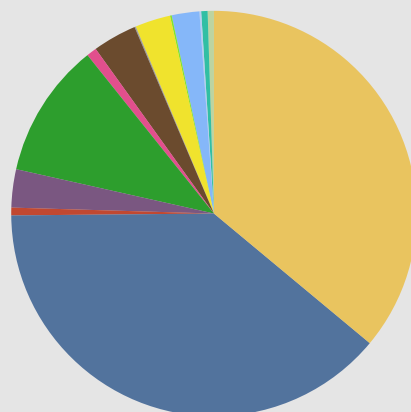

- Firm\_5
- Firm\_4
- Alpha 2.1
- Erwinia
- Frischella
- L. kunkeei*

- Gilliamella
- Snodgrassella
- Bartonella
- Klebsiella
- Halomonadaceae

- Bifidobacterium
- Serratia
- Gluconobacter
- Melissococcus
- Fructobacillus
