# Supplementary material for: Antibiotic exposure perturbs the gut microbiota and elevates mortality in honeybees
Source: PubMed Central journal article supplement (PMC5349420; doi:10.1371/journal.pbio.2001861), 2017-03-14

### *Bifidobacterium*

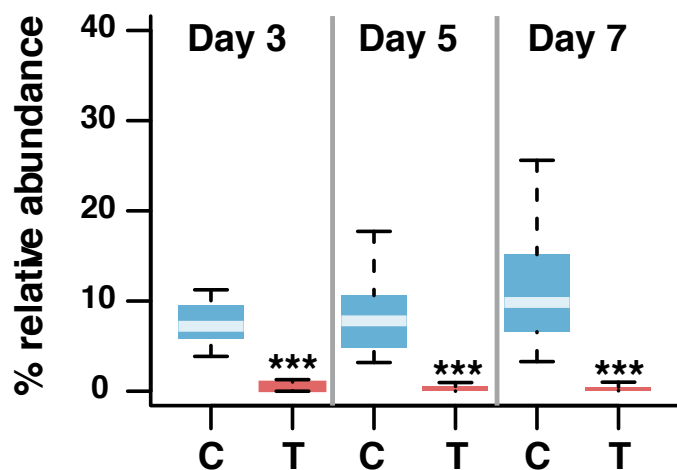

### *Lactobacillus Firm-5*

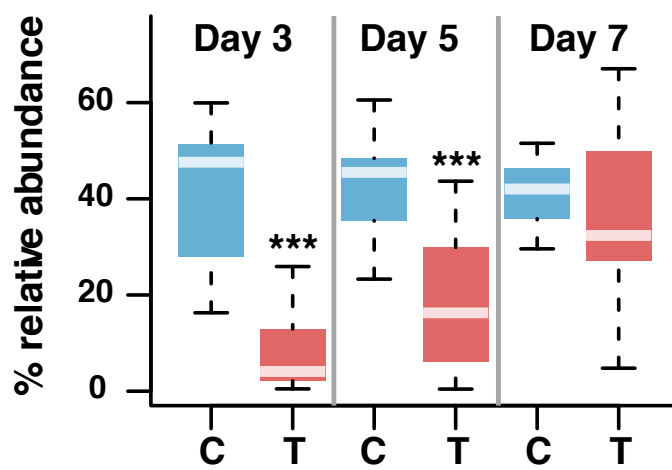

### *Lactobacillus Firm-4*

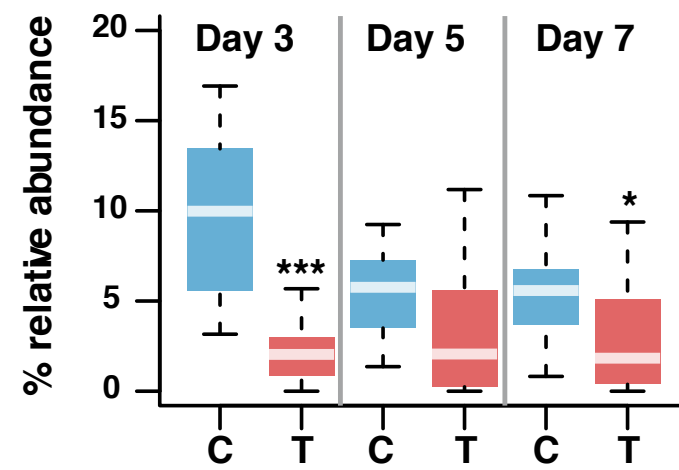

### *Bartonella*

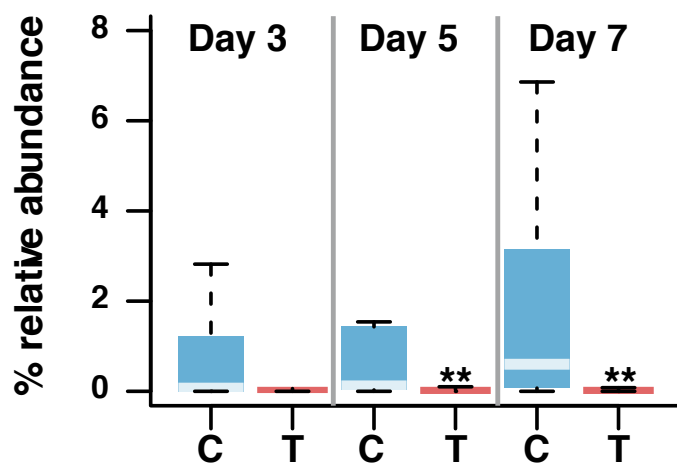

### *Gilliamella*

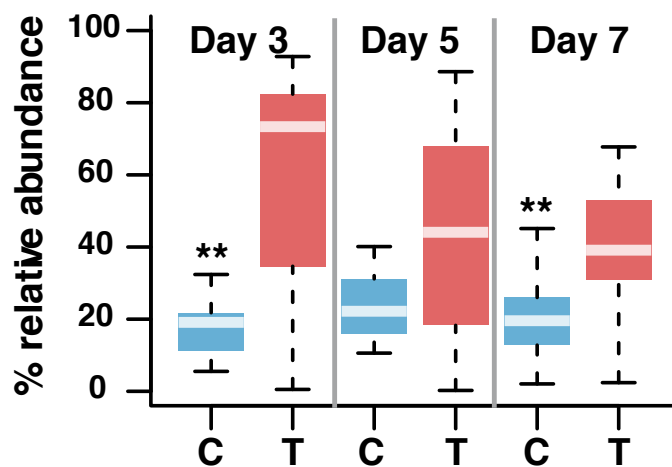

### *Serratia*

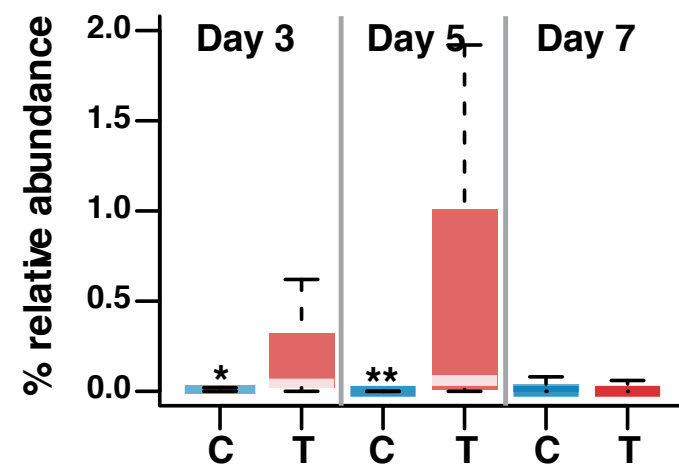

### *Halomonadaceae*

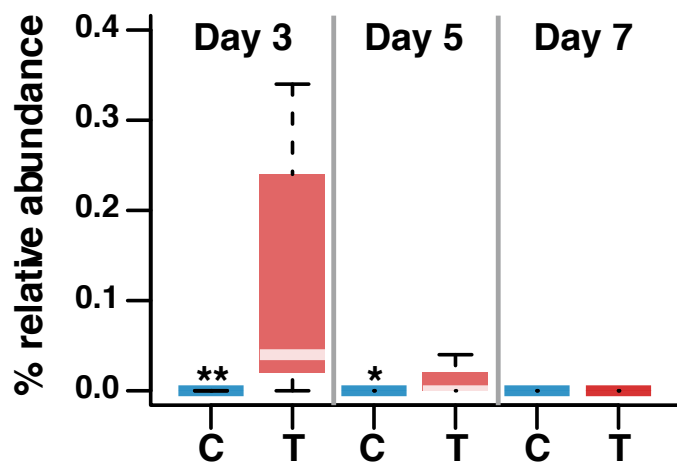

### *Klebsiella*

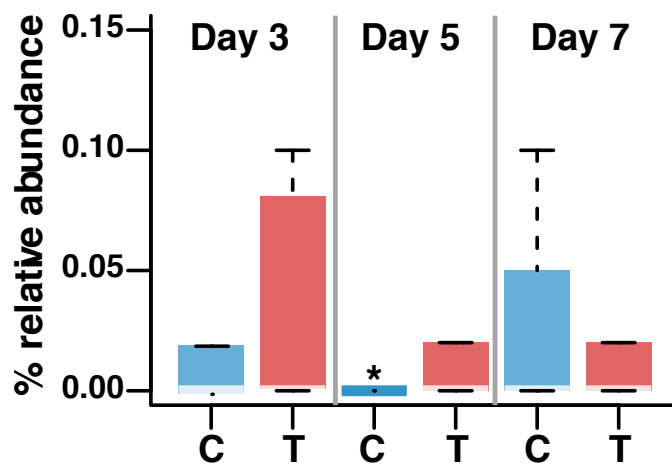

### *L. kunkeei*

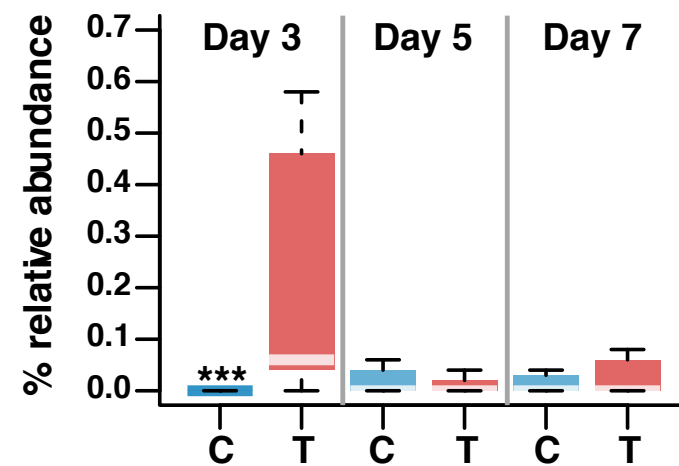

Supplement: pbio.2001861.s008.pdf [file pbio.2001861.s008.pdf]
