# Supplementary material for: Antibiotic exposure perturbs the gut microbiota and elevates mortality in honeybees
Source: PubMed Central journal article supplement (PMC5349420; doi:10.1371/journal.pbio.2001861), 2017-03-14
Supplement: pbio.2001861.s010.pdf [file pbio.2001861.s010.pdf]

**Table S1.** Number of 16S rRNA operons per genome for each of the bacteria detected in this study.

| Taxon                        | Reference                                 | 16S rRNA gene copy number* |
|------------------------------|-------------------------------------------|----------------------------|
| <i>Gilliamella</i>           | <i>Gilliamella apicola</i> wkB1           | 4                          |
| <i>Snodgrassella</i>         | <i>Snodgrassella alvi</i> wkB2            | 4                          |
| <i>Lactobacillus</i> Firm-5  | <i>Lactobacillus</i> sp. wkB8             | 4                          |
| <i>Bifidobacterium</i>       | <i>Bifidobacterium asteroides</i> PRL2011 | 2                          |
| <i>Lactobacillus</i> Firm-4  | <i>Lactobacillus</i> (genus)              | <b>4</b>                   |
| <i>Frischella</i>            | <i>Frischella perrara</i> PEB0191         | 4                          |
| <i>Bartonella</i>            | <i>Bartonella</i> (genus)                 | <b>2</b>                   |
| Alpha 2.1                    | <i>Acetobacteraceae</i> (family)          | <b>4</b>                   |
| <i>Fructobacillus</i>        | <i>Leuconostocaceae</i> (family)          | <b>4</b>                   |
| <i>Serratia</i>              | <i>Serratia</i> (genus)                   | <b>7</b>                   |
| <i>Erwinia</i>               | <i>Erwinia</i> (genus)                    | <b>7</b>                   |
| <i>Klebsiella</i>            | <i>Klebsiella</i> (genus)                 | <b>8</b>                   |
| <i>Melissococcus</i>         | <i>Melissococcus</i> (genus)              | <b>4</b>                   |
| <i>Zymobacter</i>            | <i>Zymobacter</i> (genus)                 | <b>1</b>                   |
| <i>Lactobacillus kunkeei</i> | <i>Lactobacillus</i> (genus)              | <b>4</b>                   |
| <i>Gluconobacter</i>         | <i>Gluconobacter</i> (genus)              | <b>4</b>                   |

\*Operon number was determined using the reference genome for a given bee gut bacterial species when available. For numbers in bold, a complete genome was not available for the species, so the mean 16S rRNA operon copy for the bacterial genus or family was obtained from the rrnDB (<https://rrndb.umms.med.umich.edu/>) and used as an estimate of operon number.
