# Supplementary material for: Antibiotic exposure perturbs the gut microbiota and elevates mortality in honeybees
Source: PLoS Biol. 2017 Mar 14;15(3):e2001861. doi: 10.1371/journal.pbio.2001861 (PMC5349420; doi:10.1371/journal.pbio.2001861)
Supplement: S3 Data — (XLSX) [file pbio.2001861.s013.xlsx]

## Sheet: Shannon_Index
Sample ID	Shannon's Index	Day
HT9-H0	3.47586	Treat_H0
HT9-D7	3.24534	Treat_D7
HT9-D5	3.41377	Treat_D5
HT9-D3	2.42545	Treat_D3
HT8-H0	3.81872	Treat_H0
HT8-D7	3.3503	Treat_D7
HT8-D5	3.07923	Treat_D5
HT8-D3	2.82131	Treat_D3
HT7-H0	3.91747	Treat_H0
HT7-D7	2.89382	Treat_D7
HT7-D5	3.00721	Treat_D5
HT7-D3	3.37376	Treat_D3
HT6-H0	4.05821	Treat_H0
HT6-D7	2.93439	Treat_D7
HT6-D5	3.14488	Treat_D5
HT6-D3	2.22222	Treat_D3
HT5-H0	3.69414	Treat_H0
HT5-D7	4.07616	Treat_D7
HT5-D5	2.00133	Treat_D5
HT5-D3	2.21753	Treat_D3
HT4-H0	3.83952	Treat_H0
HT4-D7	3.42317	Treat_D7
HT4-D5	1.00061	Treat_D5
HT3-H0	3.93992	Treat_H0
HT3-D7	3.42868	Treat_D7
HT3-D5	3.93999	Treat_D5
HT3-D3	2.67868	Treat_D3
HT2-H0	3.90659	Treat_H0
HT2-D7	3.72892	Treat_D7
HT2-D5	2.4116	Treat_D5
HT2-D3	2.4085	Treat_D3
HT15-H0	3.9057	Treat_H0
HT15-D7	3.54865	Treat_D7
HT15-D5	2.37472	Treat_D5
HT14-H0	3.51647	Treat_H0
HT14-D7	3.07306	Treat_D7
HT14-D5	2.90437	Treat_D5
HT14-D3	2.74493	Treat_D3
HT13-H0	3.75606	Treat_H0
HT13-D7	3.70893	Treat_D7
HT13-D5	2.59116	Treat_D5
HT13-D3	1.60883	Treat_D3
HT12-H0	4.02284	Treat_H0
HT12-D7	3.3961	Treat_D7
HT12-D5	2.56521	Treat_D5
HT12-D3	2.30169	Treat_D3
HT11-H0	3.99682	Treat_H0
HT11-D7	3.4506	Treat_D7
HT11-D5	2.83225	Treat_D5
HT11-D3	3.17583	Treat_D3
HT10-H0	4.11363	Treat_H0
HT10-D5	2.98865	Treat_D5
HT10-D3	2.75718	Treat_D3
HT1-H0	3.88187	Treat_H0
HT1-D7	2.90557	Treat_D7
HT1-D5	2.97562	Treat_D5
HT1-D3	3.11458	Treat_D3
HC9-H0	3.8978	Control_H0
HC9-D7	3.91159	Control_D7
HC9-D5	3.77836	Control_D5
HC9-D3	4.19444	Control_D3
HC8-H0	3.93051	Control_H0
HC8-D7	3.8455	Control_D7
HC8-D5	3.91359	Control_D5
HC8-D3	3.97473	Control_D3
HC7-H0	3.97905	Control_H0
HC7-D7	4.16019	Control_D7
HC7-D5	4.02433	Control_D5
HC7-D3	4.06785	Control_D3
HC6-H0	3.8782	Control_H0
HC6-D7	3.944	Control_D7
HC6-D5	4.03013	Control_D5
HC6-D3	3.32754	Control_D3
HC5-H0	4.04029	Control_H0
HC5-D7	4.3234	Control_D7
HC5-D5	4.17951	Control_D5
HC5-D3	4.10568	Control_D3
HC4-H0	3.91175	Control_H0
HC4-D7	4.19831	Control_D7
HC4-D5	4.00941	Control_D5
HC4-D3	3.81618	Control_D3
HC3-H0	3.79525	Control_H0
HC3-D7	3.98552	Control_D7
HC3-D5	4.05554	Control_D5
HC3-D3	3.49213	Control_D3
HC2-D7	3.80592	Control_D7
HC2-D5	4.06151	Control_D5
HC15-H0	4.36837	Control_H0
HC15-D7	4.03628	Control_D7
HC15-D5	4.12683	Control_D5
HC15-D3	4.08275	Control_D3
HC14-H0	3.63161	Control_H0
HC14-D7	4.23009	Control_D7
HC14-D5	4.01728	Control_D5
HC14-D3	3.98855	Control_D3
HC13-H0	4.18736	Control_H0
HC13-D7	3.8231	Control_D7
HC13-D5	4.07565	Control_D5
HC13-D3	3.73225	Control_D3
HC12-H0	3.7756	Control_H0
HC12-D7	3.83887	Control_D7
HC12-D5	4.05386	Control_D5
HC12-D3	3.7321	Control_D3
HC11-H0	3.9237	Control_H0
HC11-D7	4.13127	Control_D7
HC11-D5	4.02418	Control_D5
HC11-D3	4.2217	Control_D3
HC10-H0	3.67531	Control_H0
HC10-D7	3.99525	Control_D7
HC10-D5	4.51241	Control_D5
HC10-D3	3.98184	Control_D3
HC1-H0	4.01135	Control_H0
HC1-D7	3.54529	Control_D7
HC1-D5	4.08667	Control_D5
HC1-D3	3.61343	Control_D3

## Sheet: Bray-Curtis
	HC1-D5	HC10-D5	HC11-D5	HC12-D3	HC12-D5	HC12-H0	HC13-D7	HC14-D3	HC14-H0	HC2-D7	HC3-D5	HC5-D3	HC5-D5	HC6-D3	HC6-D5	HC7-D5	HC7-D7	HC7-H0	HC8-D7	HC8-H0	HC9-D5	HT2-D3	HT2-D5	HT3-D7	HT5-D7	HT6-D3	HT7-D5	HT7-D7	HT7-H0	HT8-D3	HT8-D5	HT8-D7	HT9-D3	P10	P3	HC12-D7	HC13-D3	HC3-D7	HC6-D7	HC8-D5	HT12-D7	HT12-H0	HT14-D7	HT6-H0	HT9-D5	P1	P6	HC14-D5	HC15-D3
HC1-D5	0	0.3868	0.2478	0.3644	0.1884	0.469	0.3748	0.259	0.3442	0.2854	0.2166	0.224	0.2632	0.4262	0.34	0.2352	0.2942	0.3966	0.2902	0.2238	0.2342	0.633	0.789	0.401	0.2976	0.638	0.4852	0.7042	0.2028	0.4942	0.577	0.3782	0.6298	0.317	0.3376	0.1932	0.3878	0.2428	0.2998	0.2028	0.5754	0.214	0.5178	0.344	0.414	0.6666	0.2382	0.2038	0.1542
HC10-D5	0.3868	0	0.3852	0.444	0.448	0.4504	0.48	0.4732	0.532	0.4022	0.4054	0.4428	0.3962	0.612	0.5098	0.3956	0.2974	0.3498	0.515	0.4068	0.5052	0.7328	0.851	0.6054	0.4132	0.7436	0.6396	0.6554	0.4596	0.634	0.6774	0.6096	0.7314	0.31	0.5208	0.4572	0.5924	0.4224	0.4516	0.4476	0.6316	0.4126	0.6412	0.3288	0.527	0.7092	0.4386	0.4666	0.4364
HC11-D5	0.2478	0.3852	0	0.4632	0.277	0.4596	0.4044	0.2092	0.2624	0.3556	0.1788	0.143	0.215	0.4364	0.2192	0.3266	0.313	0.4602	0.3046	0.1674	0.3144	0.7196	0.8306	0.498	0.4058	0.7276	0.5778	0.7002	0.2912	0.58	0.6642	0.474	0.717	0.3552	0.2722	0.2634	0.3644	0.2308	0.2618	0.2056	0.6358	0.2938	0.6808	0.403	0.5204	0.6896	0.229	0.3136	0.2884
HC12-D3	0.3644	0.444	0.4632	0	0.318	0.5732	0.4432	0.465	0.5498	0.2076	0.375	0.4276	0.4788	0.366	0.498	0.249	0.4776	0.3476	0.3442	0.411	0.3064	0.4988	0.5788	0.343	0.3746	0.5622	0.2922	0.4684	0.317	0.2996	0.3314	0.4004	0.4858	0.4228	0.4496	0.2858	0.5388	0.3122	0.5176	0.3704	0.4952	0.276	0.5998	0.3976	0.2092	0.5356	0.3608	0.3272	0.4394
HC12-D5	0.1884	0.448	0.277	0.318	0	0.4574	0.4414	0.2576	0.3396	0.2156	0.2086	0.1866	0.2674	0.2594	0.2796	0.246	0.3056	0.2886	0.1466	0.2916	0.2032	0.6608	0.6672	0.3498	0.3538	0.7226	0.4448	0.5744	0.2472	0.458	0.54	0.381	0.647	0.2652	0.2644	0.1912	0.3062	0.1794	0.2736	0.1902	0.6644	0.249	0.659	0.4256	0.381	0.556	0.2164	0.2158	0.2148
HC12-H0	0.469	0.4504	0.4596	0.5732	0.4574	0	0.5674	0.485	0.557	0.5072	0.4802	0.4524	0.4046	0.5278	0.5094	0.4928	0.2798	0.3328	0.4904	0.477	0.52	0.833	0.8598	0.6548	0.5518	0.8384	0.6972	0.7304	0.4948	0.6976	0.7768	0.6244	0.83	0.5222	0.5538	0.4892	0.5164	0.4616	0.472	0.484	0.7436	0.463	0.8024	0.3558	0.6414	0.7622	0.4666	0.5042	0.4728
HC13-D7	0.3748	0.48	0.4044	0.4432	0.4414	0.5674	0	0.402	0.4098	0.519	0.3876	0.4126	0.4074	0.5412	0.4658	0.334	0.4652	0.5698	0.4616	0.3108	0.3036	0.5194	0.9188	0.3398	0.4212	0.5244	0.4308	0.7762	0.2266	0.4958	0.6428	0.2882	0.5196	0.5984	0.4294	0.2888	0.5572	0.3674	0.5114	0.3896	0.4178	0.2742	0.6324	0.294	0.4192	0.7376	0.3446	0.3214	0.392
HC14-D3	0.259	0.4732	0.2092	0.465	0.2576	0.485	0.402	0	0.1456	0.3928	0.2344	0.171	0.2406	0.4136	0.2398	0.3502	0.3582	0.4724	0.2938	0.2524	0.2648	0.7162	0.809	0.4426	0.4028	0.7266	0.5564	0.7294	0.281	0.5796	0.6596	0.4546	0.7126	0.4362	0.194	0.2524	0.2844	0.2728	0.3194	0.244	0.6352	0.3148	0.6996	0.4108	0.5276	0.6924	0.1656	0.2648	0.1882
HC14-H0	0.3442	0.532	0.2624	0.5498	0.3396	0.557	0.4098	0.1456	0	0.4854	0.3122	0.2192	0.2854	0.4698	0.2788	0.4314	0.4188	0.5668	0.3574	0.3008	0.3356	0.7636	0.8452	0.4814	0.4994	0.7694	0.6062	0.7586	0.3358	0.627	0.7216	0.5024	0.7616	0.5152	0.2424	0.3272	0.3672	0.3622	0.3776	0.327	0.691	0.3706	0.7656	0.4554	0.6308	0.7184	0.2484	0.3648	0.2718
HC2-D7	0.2854	0.4022	0.3556	0.2076	0.2156	0.5072	0.519	0.3928	0.4854	0	0.2848	0.3454	0.4034	0.2578	0.4206	0.2374	0.4164	0.2934	0.254	0.37	0.2886	0.6108	0.585	0.3916	0.3584	0.6762	0.3088	0.4696	0.333	0.3088	0.3598	0.4106	0.599	0.3084	0.3536	0.2712	0.4596	0.2374	0.4062	0.2788	0.6186	0.288	0.6448	0.4274	0.2612	0.5496	0.3272	0.3188	0.3508
HC3-D5	0.2166	0.4054	0.1788	0.375	0.2086	0.4802	0.3876	0.2344	0.3122	0.2848	0	0.1806	0.276	0.3566	0.2044	0.246	0.3692	0.3606	0.234	0.1772	0.2006	0.6042	0.7414	0.3778	0.2864	0.6524	0.452	0.617	0.2304	0.4626	0.5492	0.3498	0.6018	0.3198	0.2636	0.185	0.2964	0.1292	0.2834	0.077	0.5932	0.237	0.62	0.392	0.3886	0.6202	0.1834	0.1852	0.2248
HC5-D3	0.224	0.4428	0.143	0.4276	0.1866	0.4524	0.4126	0.171	0.2192	0.3454	0.1806	0	0.182	0.3736	0.1918	0.315	0.2752	0.4228	0.2312	0.2174	0.2688	0.7142	0.7822	0.4578	0.3892	0.7286	0.56	0.683	0.265	0.5732	0.657	0.4544	0.7124	0.3512	0.231	0.238	0.2886	0.218	0.2102	0.1832	0.6644	0.268	0.7104	0.4226	0.5078	0.6424	0.1624	0.2462	0.245
HC5-D5	0.2632	0.3962	0.215	0.4788	0.2674	0.4046	0.4074	0.2406	0.2854	0.4034	0.276	0.182	0	0.441	0.2684	0.3886	0.2256	0.435	0.255	0.2646	0.3368	0.7832	0.8142	0.5426	0.4486	0.7888	0.6454	0.732	0.3368	0.645	0.7276	0.5378	0.7812	0.3934	0.377	0.3114	0.3238	0.285	0.26	0.2792	0.6936	0.3038	0.7284	0.4018	0.573	0.715	0.2814	0.3392	0.2296
HC6-D3	0.4262	0.612	0.4364	0.366	0.2594	0.5278	0.5412	0.4136	0.4698	0.2578	0.3566	0.3736	0.441	0	0.3598	0.3832	0.4466	0.4222	0.2696	0.4734	0.305	0.7038	0.4658	0.4156	0.4946	0.7672	0.3386	0.3574	0.3754	0.269	0.3594	0.4292	0.6914	0.4316	0.3566	0.3306	0.3824	0.3082	0.4148	0.354	0.7232	0.377	0.8182	0.5376	0.413	0.5986	0.3388	0.3702	0.4274
HC6-D5	0.34	0.5098	0.2192	0.498	0.2796	0.5094	0.4658	0.2398	0.2788	0.4206	0.2044	0.1918	0.2684	0.3598	0	0.3998	0.38	0.4804	0.2466	0.2982	0.2612	0.709	0.6954	0.465	0.3406	0.753	0.561	0.5836	0.3214	0.5634	0.6496	0.4566	0.7054	0.3554	0.2982	0.2782	0.2304	0.2814	0.3114	0.2392	0.7004	0.3212	0.793	0.5148	0.5472	0.644	0.2364	0.3204	0.3268
HC7-D5	0.2352	0.3956	0.3266	0.249	0.246	0.4928	0.334	0.3502	0.4314	0.2374	0.246	0.315	0.3886	0.3832	0.3998	0	0.392	0.3502	0.3314	0.2964	0.2022	0.4778	0.739	0.2804	0.2524	0.54	0.3042	0.5806	0.1582	0.3482	0.4436	0.2632	0.4682	0.308	0.2948	0.1448	0.431	0.2298	0.387	0.2424	0.449	0.1656	0.567	0.267	0.255	0.5496	0.2734	0.1722	0.3242
HC7-D7	0.2942	0.2974	0.313	0.4776	0.3056	0.2798	0.4652	0.3582	0.4188	0.4164	0.3692	0.2752	0.2256	0.4466	0.38	0.392	0	0.334	0.3576	0.3868	0.3904	0.7868	0.8048	0.556	0.4648	0.7948	0.647	0.7018	0.3588	0.6472	0.731	0.5444	0.784	0.343	0.4186	0.347	0.416	0.356	0.2536	0.3754	0.714	0.3174	0.7724	0.3142	0.5876	0.7132	0.3268	0.3868	0.3654
HC7-H0	0.3966	0.3498	0.4602	0.3476	0.2886	0.3328	0.5698	0.4724	0.5668	0.2934	0.3606	0.4228	0.435	0.4222	0.4804	0.3502	0.334	0	0.3318	0.4422	0.374	0.6294	0.7136	0.4402	0.4286	0.6926	0.463	0.6022	0.4388	0.4834	0.516	0.4738	0.6188	0.379	0.4358	0.384	0.5132	0.2846	0.506	0.3446	0.6322	0.3768	0.6514	0.3218	0.3642	0.5532	0.3974	0.3832	0.4176
HC8-D7	0.2902	0.515	0.3046	0.3442	0.1466	0.4904	0.4616	0.2938	0.3574	0.254	0.234	0.2312	0.255	0.2696	0.2466	0.3314	0.3576	0.3318	0	0.3088	0.2076	0.6654	0.615	0.38	0.3674	0.731	0.4438	0.5496	0.3298	0.4292	0.5118	0.4168	0.655	0.3628	0.3538	0.2564	0.3234	0.1842	0.315	0.2122	0.6754	0.2808	0.7	0.4934	0.3798	0.5706	0.2922	0.2906	0.2766
HC8-H0	0.2238	0.4068	0.1674	0.411	0.2916	0.477	0.3108	0.2524	0.3008	0.37	0.1772	0.2174	0.2646	0.4734	0.2982	0.2964	0.3868	0.4422	0.3088	0	0.264	0.6494	0.8868	0.441	0.3714	0.6554	0.5224	0.7568	0.261	0.516	0.6034	0.4182	0.65	0.4344	0.3504	0.2306	0.4352	0.2022	0.3488	0.1636	0.5588	0.249	0.5448	0.312	0.4432	0.7156	0.2418	0.2474	0.2476
HC9-D5	0.2342	0.5052	0.3144	0.3064	0.2032	0.52	0.3036	0.2648	0.3356	0.2886	0.2006	0.2688	0.3368	0.305	0.2612	0.2022	0.3904	0.374	0.2076	0.264	0	0.5172	0.6696	0.2412	0.2544	0.5792	0.3258	0.5938	0.1642	0.329	0.4232	0.2452	0.5044	0.4068	0.2784	0.0938	0.328	0.1576	0.36	0.1888	0.5324	0.145	0.6322	0.3598	0.3112	0.559	0.1984	0.162	0.2618
HT2-D3	0.633	0.7328	0.7196	0.4988	0.6608	0.833	0.5194	0.7162	0.7636	0.6108	0.6042	0.7142	0.7832	0.7038	0.709	0.4778	0.7868	0.6294	0.6654	0.6494	0.5172	0	0.8038	0.3852	0.5188	0.079	0.3796	0.7572	0.4732	0.4588	0.5206	0.2964	0.041	0.6878	0.6336	0.5116	0.7628	0.5852	0.7928	0.5904	0.379	0.5046	0.6754	0.5662	0.373	0.6682	0.6238	0.512	0.6866
HT2-D5	0.789	0.851	0.8306	0.5788	0.6672	0.8598	0.9188	0.809	0.8452	0.585	0.7414	0.7822	0.8142	0.4658	0.6954	0.739	0.8048	0.7136	0.615	0.8868	0.6696	0.8038	0	0.6862	0.705	0.8654	0.5938	0.2908	0.7834	0.4684	0.4934	0.7594	0.7984	0.6934	0.7674	0.7288	0.6958	0.737	0.787	0.766	0.8254	0.741	0.9692	0.915	0.6452	0.684	0.7692	0.7572	0.8076
HT3-D7	0.401	0.6054	0.498	0.343	0.3498	0.6548	0.3398	0.4426	0.4814	0.3916	0.3778	0.4578	0.5426	0.4156	0.465	0.2804	0.556	0.4402	0.38	0.441	0.2412	0.3852	0.6862	0	0.3336	0.4478	0.1964	0.6102	0.234	0.289	0.434	0.168	0.373	0.5066	0.3894	0.2574	0.5084	0.3428	0.5528	0.3686	0.4576	0.2936	0.66	0.3926	0.226	0.6022	0.3604	0.2626	0.4042
HT5-D7	0.2976	0.4132	0.4058	0.3746	0.3538	0.5518	0.4212	0.4028	0.4994	0.3584	0.2864	0.3892	0.4486	0.4946	0.3406	0.2524	0.4648	0.4286	0.3674	0.3714	0.2544	0.5188	0.705	0.3336	0	0.5578	0.3928	0.562	0.2636	0.3892	0.4876	0.3356	0.515	0.3524	0.4584	0.253	0.4246	0.331	0.4766	0.3146	0.5116	0.264	0.5716	0.386	0.3266	0.6572	0.351	0.2124	0.3536
HT6-D3	0.638	0.7436	0.7276	0.5622	0.7226	0.8384	0.5244	0.7266	0.7694	0.6762	0.6524	0.7286	0.7888	0.7672	0.753	0.54	0.7948	0.6926	0.731	0.6554	0.5792	0.079	0.8654	0.4478	0.5578	0	0.4402	0.8232	0.4996	0.522	0.5836	0.3576	0.0986	0.7472	0.694	0.5712	0.8176	0.6474	0.8118	0.649	0.385	0.5646	0.6794	0.5698	0.4354	0.7268	0.6618	0.555	0.6918
HT7-D5	0.4852	0.6396	0.5778	0.2922	0.4448	0.6972	0.4308	0.5564	0.6062	0.3088	0.452	0.56	0.6454	0.3386	0.561	0.3042	0.647	0.463	0.4438	0.5224	0.3258	0.3796	0.5938	0.1964	0.3928	0.4402	0	0.5196	0.3224	0.1776	0.3174	0.2018	0.3668	0.5308	0.4658	0.3488	0.6042	0.4014	0.6378	0.44	0.4608	0.3708	0.6742	0.4208	0.1598	0.61	0.465	0.3554	0.5366
HT7-D7	0.7042	0.6554	0.7002	0.4684	0.5744	0.7304	0.7762	0.7294	0.7586	0.4696	0.617	0.683	0.732	0.3574	0.5836	0.5806	0.7018	0.6022	0.5496	0.7568	0.5938	0.7572	0.2908	0.6102	0.562	0.8232	0.5196	0	0.6684	0.4012	0.453	0.6728	0.7466	0.5556	0.6126	0.6238	0.6124	0.6088	0.683	0.651	0.7698	0.6324	0.9188	0.7814	0.5602	0.6126	0.6642	0.6768	0.7296
HT7-H0	0.2028	0.4596	0.2912	0.317	0.2472	0.4948	0.2266	0.281	0.3358	0.333	0.2304	0.265	0.3368	0.3754	0.3214	0.1582	0.3588	0.4388	0.3298	0.261	0.1642	0.4732	0.7834	0.234	0.2636	0.4996	0.3224	0.6684	0	0.3634	0.5048	0.2162	0.4712	0.3938	0.29	0.1116	0.3806	0.2444	0.3368	0.238	0.4438	0.1412	0.6064	0.2366	0.3122	0.6294	0.1996	0.1498	0.2744
HT8-D3	0.4942	0.634	0.58	0.2996	0.458	0.6976	0.4958	0.5796	0.627	0.3088	0.4626	0.5732	0.645	0.269	0.5634	0.3482	0.6472	0.4834	0.4292	0.516	0.329	0.4588	0.4684	0.289	0.3892	0.522	0.1776	0.4012	0.3634	0	0.217	0.3016	0.4476	0.5798	0.4976	0.3544	0.6226	0.4118	0.653	0.452	0.5388	0.3622	0.672	0.4914	0.248	0.6088	0.4836	0.393	0.5502
HT8-D5	0.577	0.6774	0.6642	0.3314	0.54	0.7768	0.6428	0.6596	0.7216	0.3598	0.5492	0.657	0.7276	0.3594	0.6496	0.4436	0.731	0.516	0.5118	0.6034	0.4232	0.5206	0.4934	0.434	0.4876	0.5836	0.3174	0.453	0.5048	0.217	0	0.4802	0.5154	0.6214	0.5906	0.4604	0.704	0.4906	0.7308	0.5358	0.5784	0.4706	0.6518	0.6008	0.3332	0.5992	0.5686	0.4912	0.6352
HT8-D7	0.3782	0.6096	0.474	0.4004	0.381	0.6244	0.2882	0.4546	0.5024	0.4106	0.3498	0.4544	0.5378	0.4292	0.4566	0.2632	0.5444	0.4738	0.4168	0.4182	0.2452	0.2964	0.7594	0.168	0.3356	0.3576	0.2018	0.6728	0.2162	0.3016	0.4802	0	0.2858	0.506	0.3736	0.2434	0.503	0.317	0.5346	0.3384	0.379	0.2746	0.6618	0.3626	0.2524	0.6296	0.3628	0.2698	0.4304
HT9-D3	0.6298	0.7314	0.717	0.4858	0.647	0.83	0.5196	0.7126	0.7616	0.599	0.6018	0.7124	0.7812	0.6914	0.7054	0.4682	0.784	0.6188	0.655	0.65	0.5044	0.041	0.7984	0.373	0.515	0.0986	0.3668	0.7466	0.4712	0.4476	0.5154	0.2858	0	0.6776	0.6244	0.4992	0.7598	0.5758	0.7892	0.5892	0.3804	0.5002	0.6764	0.5662	0.3612	0.6568	0.6228	0.5112	0.684
P10	0.317	0.31	0.3552	0.4228	0.2652	0.5222	0.5984	0.4362	0.5152	0.3084	0.3198	0.3512	0.3934	0.4316	0.3554	0.308	0.343	0.379	0.3628	0.4344	0.4068	0.6878	0.6934	0.5066	0.3524	0.7472	0.5308	0.5556	0.3938	0.5798	0.6214	0.506	0.6776	0	0.3986	0.352	0.4142	0.3502	0.2854	0.333	0.6922	0.366	0.6898	0.4994	0.4618	0.6178	0.384	0.3696	0.3856
P3	0.3376	0.5208	0.2722	0.4496	0.2644	0.5538	0.4294	0.194	0.2424	0.3536	0.2636	0.231	0.377	0.3566	0.2982	0.2948	0.4186	0.4358	0.3538	0.3504	0.2784	0.6336	0.7674	0.3894	0.4584	0.694	0.4658	0.6126	0.29	0.4976	0.5906	0.3736	0.6244	0.3986	0	0.242	0.345	0.2558	0.3654	0.259	0.6382	0.291	0.768	0.4644	0.4996	0.5674	0.1672	0.3024	0.344
HC12-D7	0.1932	0.4572	0.2634	0.2858	0.1912	0.4892	0.2888	0.2524	0.3272	0.2712	0.185	0.238	0.3114	0.3306	0.2782	0.1448	0.347	0.384	0.2564	0.2306	0.0938	0.5116	0.7288	0.2574	0.253	0.5712	0.3488	0.6238	0.1116	0.3544	0.4604	0.2434	0.4992	0.352	0.242	0	0.3324	0.1696	0.3106	0.1766	0.5184	0.1052	0.6056	0.3044	0.3168	0.5888	0.164	0.1392	0.2584
HC13-D3	0.3878	0.5924	0.3644	0.5388	0.3062	0.5164	0.5572	0.2844	0.3672	0.4596	0.2964	0.2886	0.3238	0.3824	0.2304	0.431	0.416	0.5132	0.3234	0.4352	0.328	0.7628	0.6958	0.5084	0.4246	0.8176	0.6042	0.6124	0.3806	0.6226	0.704	0.503	0.7598	0.4142	0.345	0.3324	0	0.3508	0.3358	0.3176	0.7604	0.4026	0.8334	0.567	0.5806	0.7038	0.2896	0.3378	0.316
HC3-D7	0.2428	0.4224	0.2308	0.3122	0.1794	0.4616	0.3674	0.2728	0.3622	0.2374	0.1292	0.218	0.285	0.3082	0.2814	0.2298	0.356	0.2846	0.1842	0.2022	0.1576	0.5852	0.737	0.3428	0.331	0.6474	0.4014	0.6088	0.2444	0.4118	0.4906	0.317	0.5758	0.3502	0.2558	0.1696	0.3508	0	0.3062	0.1198	0.585	0.2048	0.625	0.3612	0.3428	0.5616	0.1882	0.2152	0.2588
HC6-D7	0.2998	0.4516	0.2618	0.5176	0.2736	0.472	0.5114	0.3194	0.3776	0.4062	0.2834	0.2102	0.26	0.4148	0.3114	0.387	0.2536	0.506	0.315	0.3488	0.36	0.7928	0.787	0.5528	0.4766	0.8118	0.6378	0.683	0.3368	0.653	0.7308	0.5346	0.7892	0.2854	0.3654	0.3106	0.3358	0.3062	0	0.2854	0.7524	0.3392	0.7874	0.5102	0.5872	0.7268	0.288	0.347	0.3512
HC8-D5	0.2028	0.4476	0.2056	0.3704	0.1902	0.484	0.3896	0.244	0.327	0.2788	0.077	0.1832	0.2792	0.354	0.2392	0.2424	0.3754	0.3446	0.2122	0.1636	0.1888	0.5904	0.766	0.3686	0.3146	0.649	0.44	0.651	0.238	0.452	0.5358	0.3384	0.5892	0.333	0.259	0.1766	0.3176	0.1198	0.2854	0	0.591	0.2322	0.5966	0.3984	0.376	0.6144	0.1918	0.18	0.2188
HT12-D7	0.5754	0.6316	0.6358	0.4952	0.6644	0.7436	0.4178	0.6352	0.691	0.6186	0.5932	0.6644	0.6936	0.7232	0.7004	0.449	0.714	0.6322	0.6754	0.5588	0.5324	0.379	0.8254	0.4576	0.5116	0.385	0.4608	0.7698	0.4438	0.5388	0.5784	0.379	0.3804	0.6922	0.6382	0.5184	0.7604	0.585	0.7524	0.591	0	0.508	0.6056	0.4718	0.3844	0.4972	0.6088	0.5014	0.6038
HT12-H0	0.214	0.4126	0.2938	0.276	0.249	0.463	0.2742	0.3148	0.3706	0.288	0.237	0.268	0.3038	0.377	0.3212	0.1656	0.3174	0.3768	0.2808	0.249	0.145	0.5046	0.741	0.2936	0.264	0.5646	0.3708	0.6324	0.1412	0.3622	0.4706	0.2746	0.5002	0.366	0.291	0.1052	0.4026	0.2048	0.3392	0.2322	0.508	0	0.6182	0.277	0.3422	0.5988	0.1824	0.1966	0.3208
HT14-D7	0.5178	0.6412	0.6808	0.5998	0.659	0.8024	0.6324	0.6996	0.7656	0.6448	0.62	0.7104	0.7284	0.8182	0.793	0.567	0.7724	0.6514	0.7	0.5448	0.6322	0.6754	0.9692	0.66	0.5716	0.6794	0.6742	0.9188	0.6064	0.672	0.6518	0.6618	0.6764	0.6898	0.768	0.6056	0.8334	0.625	0.7874	0.5966	0.6056	0.6182	0	0.5864	0.5492	0.8072	0.6984	0.548	0.5692
HT6-H0	0.344	0.3288	0.403	0.3976	0.4256	0.3558	0.294	0.4108	0.4554	0.4274	0.392	0.4226	0.4018	0.5376	0.5148	0.267	0.3142	0.3218	0.4934	0.312	0.3598	0.5662	0.915	0.3926	0.386	0.5698	0.4208	0.7814	0.2366	0.4914	0.6008	0.3626	0.5662	0.4994	0.4644	0.3044	0.567	0.3612	0.5102	0.3984	0.4718	0.277	0.5864	0	0.3888	0.7214	0.3646	0.3116	0.3938
HT9-D5	0.414	0.527	0.5204	0.2092	0.381	0.6414	0.4192	0.5276	0.6308	0.2612	0.3886	0.5078	0.573	0.413	0.5472	0.255	0.5876	0.3642	0.3798	0.4432	0.3112	0.373	0.6452	0.226	0.3266	0.4354	0.1598	0.5602	0.3122	0.248	0.3332	0.2524	0.3612	0.4618	0.4996	0.3168	0.5806	0.3428	0.5872	0.376	0.3844	0.3422	0.5492	0.3888	0	0.5818	0.462	0.2966	0.4722
P1	0.6666	0.7092	0.6896	0.5356	0.556	0.7622	0.7376	0.6924	0.7184	0.5496	0.6202	0.6424	0.715	0.5986	0.644	0.5496	0.7132	0.5532	0.5706	0.7156	0.559	0.6682	0.684	0.6022	0.6572	0.7268	0.61	0.6126	0.6294	0.6088	0.5992	0.6296	0.6568	0.6178	0.5674	0.5888	0.7038	0.5616	0.7268	0.6144	0.4972	0.5988	0.8072	0.7214	0.5818	0	0.623	0.6388	0.6912
P6	0.2382	0.4386	0.229	0.3608	0.2164	0.4666	0.3446	0.1656	0.2484	0.3272	0.1834	0.1624	0.2814	0.3388	0.2364	0.2734	0.3268	0.3974	0.2922	0.2418	0.1984	0.6238	0.7692	0.3604	0.351	0.6618	0.465	0.6642	0.1996	0.4836	0.5686	0.3628	0.6228	0.384	0.1672	0.164	0.2896	0.1882	0.288	0.1918	0.6088	0.1824	0.6984	0.3646	0.462	0.623	0	0.2024	0.2494
HC14-D5	0.2038	0.4666	0.3136	0.3272	0.2158	0.5042	0.3214	0.2648	0.3648	0.3188	0.1852	0.2462	0.3392	0.3702	0.3204	0.1722	0.3868	0.3832	0.2906	0.2474	0.162	0.512	0.7572	0.2626	0.2124	0.555	0.3554	0.6768	0.1498	0.393	0.4912	0.2698	0.5112	0.3696	0.3024	0.1392	0.3378	0.2152	0.347	0.18	0.5014	0.1966	0.548	0.3116	0.2966	0.6388	0.2024	0	0.2144
HC15-D3	0.1542	0.4364	0.2884	0.4394	0.2148	0.4728	0.392	0.1882	0.2718	0.3508	0.2248	0.245	0.2296	0.4274	0.3268	0.3242	0.3654	0.4176	0.2766	0.2476	0.2618	0.6866	0.8076	0.4042	0.3536	0.6918	0.5366	0.7296	0.2744	0.5502	0.6352	0.4304	0.684	0.3856	0.344	0.2584	0.316	0.2588	0.3512	0.2188	0.6038	0.3208	0.5692	0.3938	0.4722	0.6912	0.2494	0.2144	0
HC2-D5	0.3212	0.5192	0.256	0.5326	0.3308	0.5436	0.3884	0.137	0.1382	0.4618	0.2862	0.2232	0.3224	0.4494	0.2792	0.4156	0.4262	0.5416	0.366	0.2732	0.3002	0.7378	0.8484	0.473	0.4522	0.7426	0.5812	0.7632	0.3128	0.6012	0.691	0.4772	0.7352	0.5118	0.2386	0.3028	0.371	0.3178	0.3728	0.2894	0.6588	0.35	0.725	0.431	0.5814	0.7274	0.2082	0.3202	0.2892
HC3-H0	0.2438	0.4864	0.1556	0.4196	0.2762	0.5242	0.3566	0.2022	0.2064	0.3646	0.1818	0.1606	0.2764	0.3992	0.1898	0.2968	0.3658	0.4748	0.3092	0.2044	0.2244	0.6288	0.7854	0.3888	0.3846	0.6504	0.4802	0.677	0.2044	0.4918	0.5886	0.3726	0.627	0.429	0.202	0.1918	0.35	0.2322	0.296	0.192	0.617	0.228	0.7176	0.4064	0.4976	0.6378	0.16	0.2634	0.2926
HC8-D3	0.1742	0.4164	0.2188	0.372	0.1476	0.4698	0.4108	0.1994	0.2854	0.2498	0.1312	0.173	0.291	0.354	0.2668	0.241	0.3468	0.3478	0.269	0.2	0.234	0.6208	0.7792	0.3614	0.3376	0.6676	0.4744	0.654	0.2258	0.482	0.5638	0.3698	0.6202	0.3026	0.1988	0.1722	0.3012	0.1736	0.289	0.1244	0.6106	0.2426	0.6054	0.386	0.4056	0.6156	0.1392	0.1916	0.1712
HC9-D7	0.33	0.5096	0.2704	0.4566	0.288	0.4548	0.41	0.2658	0.3182	0.4186	0.255	0.2052	0.174	0.4034	0.2142	0.3688	0.317	0.4636	0.2224	0.2856	0.3	0.7302	0.7562	0.5104	0.4236	0.756	0.6088	0.6364	0.3384	0.5904	0.6708	0.5064	0.7278	0.436	0.339	0.3016	0.2476	0.259	0.293	0.2602	0.6574	0.3072	0.761	0.477	0.5536	0.627	0.2658	0.339	0.286
HC9-H0	0.3398	0.472	0.3808	0.4298	0.4202	0.5374	0.318	0.405	0.4676	0.4464	0.3654	0.4184	0.4436	0.5436	0.4776	0.3166	0.4746	0.5354	0.4626	0.3122	0.339	0.5498	0.905	0.426	0.3708	0.5554	0.4902	0.7854	0.292	0.5096	0.6356	0.3728	0.5474	0.5158	0.4876	0.3128	0.5388	0.377	0.4986	0.3642	0.4886	0.3164	0.5958	0.3184	0.4344	0.7544	0.39	0.3186	0.382
HT15-D7	0.3332	0.5636	0.3538	0.5382	0.4506	0.647	0.3274	0.4486	0.4874	0.5188	0.3366	0.419	0.4402	0.6194	0.475	0.402	0.5674	0.573	0.4416	0.229	0.3824	0.6032	0.9726	0.4406	0.424	0.6044	0.4912	0.886	0.343	0.5158	0.6514	0.4076	0.6018	0.5886	0.5256	0.3618	0.6082	0.3496	0.5196	0.3138	0.5184	0.398	0.417	0.3866	0.4248	0.8002	0.4556	0.3286	0.358
HT2-H0	0.46	0.3436	0.514	0.403	0.5462	0.3716	0.3712	0.536	0.5722	0.5068	0.515	0.5346	0.5062	0.6556	0.635	0.3354	0.4068	0.3274	0.5946	0.4196	0.473	0.5784	0.926	0.4948	0.4748	0.5842	0.5136	0.7634	0.3626	0.537	0.617	0.4918	0.5784	0.5756	0.547	0.4136	0.6902	0.482	0.625	0.5182	0.4546	0.3662	0.588	0.1586	0.426	0.695	0.4782	0.4324	0.5158
P2	0.3792	0.4538	0.3006	0.6044	0.3716	0.5618	0.5186	0.2668	0.2744	0.5002	0.3828	0.2884	0.3428	0.524	0.3758	0.4782	0.3756	0.5926	0.4666	0.4056	0.4804	0.885	0.8608	0.5826	0.5242	0.8898	0.7254	0.7716	0.449	0.7684	0.8294	0.6468	0.8826	0.3964	0.3648	0.4374	0.3882	0.4522	0.3516	0.4212	0.7856	0.4898	0.7528	0.526	0.6734	0.8134	0.354	0.4042	0.3492
P7	0.3864	0.5228	0.4116	0.3008	0.2772	0.5368	0.5596	0.4376	0.491	0.1704	0.3822	0.3852	0.4378	0.1622	0.4114	0.331	0.4378	0.3848	0.2924	0.477	0.3326	0.6636	0.4858	0.438	0.4488	0.7282	0.3282	0.3922	0.3724	0.2674	0.346	0.4452	0.6514	0.3484	0.3606	0.3196	0.4688	0.3324	0.441	0.3814	0.6782	0.3326	0.7672	0.5006	0.364	0.5558	0.3624	0.4226	0.4598
P9	0.3538	0.4814	0.3318	0.3404	0.2304	0.5352	0.4786	0.2914	0.3676	0.2718	0.2342	0.2858	0.4108	0.3108	0.3266	0.274	0.4446	0.3142	0.265	0.3484	0.254	0.6168	0.6858	0.2776	0.3902	0.681	0.4038	0.5486	0.3288	0.4454	0.4862	0.3916	0.6058	0.3864	0.2458	0.2562	0.3524	0.2128	0.4046	0.2446	0.5988	0.3318	0.6872	0.4516	0.3548	0.5324	0.242	0.2656	0.3038
P5	0.3808	0.4596	0.4388	0.6152	0.388	0.5628	0.5686	0.4502	0.4974	0.5184	0.4092	0.4308	0.4438	0.5228	0.4318	0.5148	0.4946	0.5186	0.4562	0.4248	0.5262	0.833	0.8628	0.5612	0.471	0.838	0.6876	0.7242	0.5066	0.7306	0.7766	0.6174	0.8298	0.3978	0.5258	0.502	0.4982	0.4452	0.4952	0.428	0.7334	0.538	0.4722	0.5226	0.6152	0.7774	0.4678	0.43	0.3408
HC15-D5	0.4054	0.3704	0.3556	0.5696	0.3822	0.2552	0.4256	0.3826	0.4192	0.4912	0.391	0.3432	0.2924	0.4758	0.4274	0.4618	0.2258	0.343	0.4248	0.3702	0.4362	0.8372	0.9032	0.6176	0.5602	0.8424	0.6916	0.7738	0.4188	0.6976	0.7808	0.5876	0.8354	0.491	0.447	0.3926	0.4832	0.3802	0.3916	0.3998	0.7466	0.3904	0.7742	0.3036	0.6508	0.7716	0.3612	0.444	0.4138
HC7-D3	0.1766	0.4194	0.1928	0.4028	0.2114	0.4586	0.3468	0.1284	0.2138	0.3386	0.163	0.1404	0.224	0.4054	0.2392	0.2866	0.316	0.425	0.2616	0.1744	0.22	0.6748	0.8014	0.4186	0.3416	0.68	0.5168	0.709	0.2354	0.5366	0.618	0.4154	0.672	0.3924	0.2526	0.2138	0.2904	0.2014	0.2828	0.1638	0.5904	0.2636	0.6224	0.3672	0.4584	0.6706	0.1654	0.1972	0.145
HT3-D3	0.6088	0.6918	0.682	0.55	0.7032	0.7966	0.449	0.669	0.6956	0.6768	0.6438	0.7064	0.7326	0.7674	0.7322	0.533	0.7574	0.7034	0.709	0.5966	0.5584	0.1264	0.8758	0.428	0.5376	0.1212	0.4636	0.8152	0.4792	0.5238	0.608	0.36	0.1446	0.7352	0.6984	0.5496	0.7972	0.6534	0.791	0.6384	0.3792	0.5454	0.6716	0.5286	0.4548	0.7722	0.6404	0.53	0.6394
P4	0.3936	0.597	0.328	0.49	0.2804	0.5618	0.4898	0.2292	0.2574	0.4002	0.2838	0.27	0.4196	0.338	0.2996	0.3746	0.4652	0.4428	0.3294	0.388	0.2798	0.6582	0.7134	0.3846	0.4638	0.7144	0.474	0.638	0.3414	0.5002	0.5916	0.377	0.6444	0.4412	0.132	0.2816	0.3416	0.2776	0.4076	0.273	0.6534	0.3536	0.7804	0.5192	0.503	0.5624	0.2124	0.3094	0.3616
HC5-D7	0.127	0.342	0.235	0.3868	0.191	0.465	0.4164	0.2796	0.365	0.2704	0.186	0.2228	0.2914	0.409	0.3076	0.2716	0.3134	0.381	0.2846	0.2636	0.2776	0.6672	0.7494	0.4382	0.3158	0.6812	0.5152	0.6338	0.2488	0.5232	0.606	0.4172	0.666	0.2654	0.3216	0.2378	0.37	0.2434	0.2986	0.214	0.6182	0.254	0.5666	0.3946	0.4446	0.645	0.2464	0.2556	0.2008
HT15-H0	0.447	0.587	0.3234	0.542	0.331	0.534	0.5278	0.2646	0.2558	0.4626	0.2716	0.2748	0.4066	0.348	0.2434	0.4138	0.4474	0.5068	0.354	0.4064	0.3396	0.7338	0.7128	0.4544	0.4752	0.792	0.5578	0.569	0.3876	0.581	0.6698	0.4578	0.7212	0.4166	0.192	0.3366	0.2836	0.3106	0.3532	0.3024	0.7452	0.3876	0.852	0.5684	0.5798	0.6484	0.2628	0.3704	0.4078
HT4-D7	0.4222	0.5788	0.4512	0.504	0.4808	0.6398	0.2714	0.395	0.4218	0.529	0.3986	0.4526	0.5136	0.5384	0.5044	0.3644	0.5798	0.5678	0.5342	0.3676	0.3508	0.392	0.905	0.2396	0.4118	0.3952	0.3416	0.8212	0.272	0.4814	0.5848	0.2058	0.3914	0.5836	0.4318	0.333	0.5444	0.4078	0.5528	0.3968	0.331	0.3894	0.614	0.3332	0.3476	0.7522	0.376	0.2916	0.376
HT5-D3	0.6906	0.7308	0.7532	0.6286	0.785	0.8636	0.4716	0.7496	0.761	0.7418	0.7148	0.7884	0.8116	0.8314	0.8146	0.6048	0.8382	0.7662	0.7924	0.657	0.6408	0.2042	0.9602	0.5142	0.6258	0.146	0.5412	0.888	0.561	0.602	0.69	0.4306	0.209	0.81	0.7632	0.6322	0.8796	0.7192	0.8726	0.7114	0.4388	0.6266	0.6802	0.5742	0.5188	0.8352	0.7214	0.6118	0.7202
HC11-D3	0.2228	0.3702	0.3254	0.27	0.2834	0.4838	0.3376	0.3526	0.4312	0.2792	0.2832	0.2888	0.362	0.4478	0.3988	0.1288	0.364	0.3808	0.3526	0.299	0.2362	0.5248	0.765	0.354	0.2436	0.5612	0.3976	0.6066	0.1852	0.4078	0.4926	0.344	0.5264	0.3446	0.3426	0.1866	0.4462	0.2746	0.371	0.2866	0.4334	0.1742	0.5712	0.2936	0.3236	0.5492	0.2652	0.1928	0.3244
HC13-H0	0.3388	0.313	0.3624	0.4028	0.2992	0.238	0.5144	0.4196	0.4878	0.3182	0.3418	0.3108	0.324	0.4298	0.4056	0.3102	0.2018	0.169	0.3606	0.407	0.4012	0.6892	0.785	0.5166	0.4216	0.736	0.5522	0.641	0.3712	0.5686	0.6326	0.4978	0.6892	0.3376	0.3878	0.347	0.455	0.321	0.3818	0.3456	0.6616	0.3084	0.7214	0.277	0.487	0.6116	0.3254	0.3654	0.4066
HT3-D5	0.4742	0.5812	0.556	0.3908	0.465	0.6758	0.4564	0.5498	0.59	0.4212	0.4346	0.5466	0.6252	0.5106	0.5498	0.2682	0.6226	0.4592	0.4956	0.5058	0.3342	0.4648	0.7422	0.3078	0.377	0.5256	0.3166	0.6158	0.3372	0.352	0.3252	0.301	0.4518	0.5154	0.4378	0.3404	0.597	0.4042	0.6204	0.4304	0.4798	0.3584	0.653	0.4472	0.326	0.576	0.4614	0.3498	0.5262
HC4-D5	0.289	0.417	0.3186	0.417	0.3602	0.546	0.2104	0.3564	0.4028	0.4164	0.3346	0.335	0.374	0.5062	0.4866	0.2328	0.426	0.503	0.451	0.2616	0.3322	0.5776	0.9512	0.3708	0.3918	0.5792	0.4238	0.7824	0.207	0.515	0.6404	0.3394	0.5808	0.4676	0.3706	0.2678	0.519	0.3186	0.417	0.3366	0.4442	0.2892	0.5538	0.2266	0.3802	0.7226	0.3244	0.2422	0.3246
HC1-D3	0.3738	0.4918	0.4074	0.5894	0.3992	0.554	0.528	0.3684	0.3792	0.5038	0.4682	0.3834	0.3178	0.4908	0.4148	0.468	0.3494	0.5986	0.4382	0.4864	0.434	0.7894	0.8214	0.5694	0.5382	0.7952	0.6358	0.7468	0.4058	0.6546	0.7524	0.5412	0.7862	0.3774	0.44	0.4198	0.4252	0.4938	0.2812	0.4748	0.733	0.4164	0.821	0.5242	0.6654	0.7332	0.402	0.461	0.3602
HC15-D7	0.329	0.467	0.2582	0.4758	0.234	0.5048	0.547	0.3306	0.3998	0.3622	0.2518	0.228	0.2988	0.3884	0.2168	0.3756	0.3454	0.465	0.2796	0.3564	0.3208	0.7874	0.6678	0.5228	0.3878	0.8466	0.6102	0.5492	0.375	0.6126	0.6986	0.5126	0.7728	0.284	0.338	0.2886	0.2664	0.2662	0.2356	0.2732	0.7876	0.3358	0.8152	0.5596	0.5442	0.694	0.2922	0.3592	0.3834
HC9-D3	0.2696	0.4278	0.2354	0.5176	0.2708	0.4772	0.4918	0.2568	0.3086	0.4068	0.2498	0.1944	0.2072	0.4072	0.1782	0.3826	0.2948	0.506	0.273	0.3452	0.3178	0.7756	0.7344	0.535	0.3416	0.7846	0.622	0.6032	0.321	0.6338	0.7216	0.5154	0.7732	0.2938	0.35	0.2966	0.2558	0.3118	0.2074	0.2858	0.7292	0.3362	0.7754	0.495	0.5798	0.7094	0.2764	0.3348	0.288
HT2-D7	0.3282	0.5418	0.303	0.4982	0.3912	0.5886	0.2932	0.197	0.2114	0.51	0.2872	0.2752	0.3558	0.5116	0.322	0.3444	0.4774	0.5724	0.3858	0.244	0.2468	0.622	0.862	0.344	0.3396	0.6272	0.4732	0.8188	0.248	0.486	0.6106	0.3628	0.6206	0.5734	0.3308	0.256	0.4114	0.3326	0.4356	0.2892	0.5338	0.2984	0.6042	0.3522	0.4616	0.7668	0.2718	0.235	0.2776
HC4-D7	0.2648	0.3724	0.2614	0.4386	0.3396	0.5338	0.26	0.2724	0.3242	0.4008	0.2846	0.2788	0.3284	0.4764	0.4178	0.25	0.372	0.515	0.4362	0.2344	0.2794	0.6518	0.9256	0.4202	0.391	0.6576	0.496	0.7656	0.2282	0.523	0.612	0.3972	0.652	0.4412	0.2948	0.2232	0.4574	0.2842	0.3536	0.2924	0.5314	0.266	0.5852	0.2946	0.4616	0.7078	0.253	0.2428	0.2944
HC13-D5	0.2282	0.3376	0.3404	0.2912	0.3428	0.5182	0.3194	0.3512	0.4336	0.3256	0.34	0.3354	0.3624	0.5116	0.4404	0.1652	0.3386	0.4364	0.4094	0.3282	0.2742	0.506	0.781	0.3422	0.2734	0.517	0.3804	0.6786	0.1874	0.4116	0.5236	0.3472	0.5062	0.3542	0.4194	0.237	0.491	0.3544	0.3826	0.3462	0.4256	0.2328	0.5644	0.2678	0.3002	0.6384	0.339	0.241	0.3252
HC1-H0	0.2284	0.343	0.2716	0.4456	0.3084	0.5464	0.3548	0.26	0.3326	0.3908	0.2776	0.2782	0.3264	0.497	0.426	0.3072	0.346	0.5038	0.4272	0.2404	0.3294	0.708	0.91	0.45	0.4076	0.7122	0.5492	0.8062	0.2732	0.5832	0.6638	0.4608	0.7054	0.3454	0.342	0.26	0.4488	0.3162	0.2916	0.2746	0.6138	0.3144	0.5714	0.3578	0.493	0.7596	0.2532	0.2384	0.2564
HC3-D3	0.427	0.5066	0.4522	0.5704	0.4466	0.5672	0.478	0.4258	0.4134	0.4988	0.5138	0.429	0.356	0.5518	0.4706	0.4536	0.4524	0.5976	0.4636	0.499	0.4768	0.7938	0.84	0.6094	0.5316	0.801	0.6638	0.714	0.4508	0.6622	0.75	0.6	0.793	0.5098	0.4722	0.4594	0.384	0.5206	0.4996	0.5198	0.6844	0.4386	0.801	0.519	0.6642	0.687	0.4528	0.5098	0.4132
HT11-H0	0.3218	0.517	0.2418	0.5756	0.3024	0.4746	0.4942	0.2292	0.2604	0.4846	0.3276	0.1978	0.2336	0.4878	0.3032	0.4726	0.3436	0.5376	0.3572	0.276	0.4266	0.8802	0.8306	0.615	0.5448	0.8848	0.7214	0.7572	0.4222	0.7392	0.8234	0.6172	0.8766	0.4508	0.3456	0.3928	0.345	0.3538	0.2772	0.317	0.7904	0.4066	0.7794	0.5074	0.6624	0.8154	0.2838	0.3872	0.3158
HC6-H0	0.3826	0.4742	0.2824	0.6098	0.3704	0.5254	0.4674	0.2308	0.2628	0.5312	0.3848	0.24	0.2086	0.5106	0.3416	0.4972	0.3066	0.5978	0.3862	0.352	0.4456	0.9032	0.8964	0.6462	0.572	0.9064	0.7434	0.8216	0.442	0.7618	0.846	0.6402	0.8996	0.4434	0.3726	0.4196	0.3364	0.3986	0.269	0.3908	0.8112	0.4218	0.7876	0.517	0.6992	0.8374	0.3086	0.4272	0.3328
HC11-D7	0.1182	0.3574	0.2316	0.4198	0.2332	0.4958	0.3442	0.2598	0.3238	0.3454	0.2448	0.2472	0.2686	0.4544	0.386	0.278	0.3322	0.4492	0.3568	0.1914	0.2772	0.679	0.8704	0.4336	0.3674	0.6814	0.5294	0.7656	0.235	0.5458	0.6276	0.423	0.679	0.3462	0.3494	0.2178	0.4182	0.2636	0.298	0.2256	0.5892	0.271	0.5206	0.3244	0.4642	0.7268	0.2436	0.2102	0.1746
HT3-H0	0.398	0.3444	0.4396	0.54	0.4054	0.1948	0.49	0.4702	0.5166	0.4512	0.453	0.447	0.4106	0.5886	0.5644	0.4458	0.3206	0.2802	0.494	0.3992	0.5338	0.8244	0.9486	0.652	0.5432	0.8288	0.6866	0.8076	0.4874	0.7044	0.7692	0.6288	0.822	0.4768	0.529	0.4818	0.6128	0.4346	0.5318	0.443	0.7168	0.4584	0.6556	0.2916	0.6088	0.7638	0.4636	0.475	0.4196
HC11-H0	0.1964	0.4226	0.1886	0.4844	0.2544	0.5314	0.3622	0.1706	0.2042	0.3842	0.2204	0.1742	0.2452	0.4924	0.3072	0.352	0.3684	0.4938	0.3276	0.1836	0.3112	0.7622	0.8884	0.5098	0.4266	0.7658	0.6072	0.7968	0.3	0.6222	0.7072	0.5002	0.7592	0.4156	0.288	0.2806	0.388	0.2664	0.3126	0.2104	0.6648	0.326	0.5992	0.3984	0.5452	0.7572	0.2398	0.2826	0.2074
HC1-D7	0.4094	0.5938	0.3192	0.6282	0.3996	0.6238	0.4498	0.1952	0.1662	0.546	0.3834	0.2792	0.3072	0.5274	0.3374	0.5048	0.4836	0.6376	0.4188	0.3702	0.404	0.813	0.8856	0.545	0.5686	0.8172	0.6524	0.8056	0.4098	0.6736	0.7872	0.55	0.8074	0.5722	0.2838	0.3942	0.3102	0.4366	0.4358	0.3904	0.7728	0.4406	0.7988	0.5264	0.7014	0.7808	0.2962	0.4318	0.3306
HT13-H0	0.3684	0.4282	0.425	0.4096	0.4716	0.5452	0.193	0.4546	0.4536	0.4604	0.4388	0.4532	0.4436	0.5594	0.5394	0.2868	0.4624	0.526	0.5398	0.3576	0.3786	0.4136	0.9082	0.343	0.4238	0.4178	0.378	0.7706	0.2488	0.4894	0.6166	0.2426	0.412	0.518	0.4632	0.327	0.6088	0.4226	0.5384	0.4474	0.3662	0.2764	0.6304	0.2292	0.38	0.7312	0.3842	0.3566	0.4418
HC10-D3	0.2244	0.4392	0.2636	0.469	0.253	0.4992	0.3838	0.1582	0.2324	0.3812	0.2194	0.2202	0.2262	0.4454	0.3086	0.349	0.379	0.4662	0.3082	0.2196	0.2808	0.7234	0.8412	0.4656	0.3896	0.7298	0.5662	0.764	0.2964	0.5882	0.6692	0.4632	0.7218	0.4322	0.3142	0.2694	0.2664	0.2682	0.3448	0.2228	0.6338	0.3358	0.623	0.3894	0.5052	0.7232	0.209	0.233	0.1308
HC15-H0	0.312	0.2492	0.3824	0.5192	0.3778	0.3772	0.484	0.4652	0.503	0.4204	0.443	0.3942	0.3262	0.5512	0.5242	0.4216	0.2456	0.362	0.4534	0.3794	0.5184	0.805	0.901	0.6632	0.538	0.8114	0.693	0.7418	0.467	0.6668	0.75	0.6208	0.803	0.3818	0.4856	0.4654	0.5738	0.4192	0.4106	0.4308	0.68	0.4146	0.5922	0.3414	0.5958	0.707	0.443	0.4836	0.3872
HC14-D7	0.3858	0.2634	0.4138	0.412	0.4824	0.6118	0.5414	0.5064	0.5858	0.4242	0.424	0.461	0.492	0.6186	0.5138	0.3604	0.452	0.486	0.5366	0.4508	0.484	0.6446	0.8122	0.5794	0.3246	0.6544	0.593	0.5598	0.4392	0.5966	0.6004	0.5792	0.6422	0.3318	0.4944	0.4352	0.604	0.4436	0.482	0.4588	0.543	0.4128	0.631	0.473	0.4768	0.6298	0.4654	0.4518	0.474
HC10-H0	0.4296	0.6186	0.3424	0.6398	0.4006	0.5636	0.4864	0.1972	0.134	0.5672	0.3822	0.2776	0.2914	0.4718	0.297	0.526	0.4492	0.6324	0.395	0.3764	0.4008	0.8386	0.8488	0.5704	0.565	0.844	0.6784	0.7734	0.4296	0.6984	0.7896	0.577	0.8358	0.557	0.2994	0.4124	0.3242	0.4342	0.401	0.3848	0.7678	0.4644	0.8262	0.5402	0.6968	0.7744	0.3084	0.425	0.3292
HT11-D5	0.5634	0.6834	0.5896	0.6122	0.6222	0.7772	0.3488	0.5414	0.5506	0.659	0.5398	0.5994	0.6478	0.6778	0.6348	0.5044	0.7128	0.6814	0.662	0.5048	0.4882	0.324	0.958	0.3114	0.5398	0.3278	0.4174	0.8838	0.417	0.552	0.676	0.2992	0.3192	0.7254	0.5518	0.4704	0.6918	0.5442	0.6988	0.541	0.4182	0.5212	0.6704	0.4634	0.4558	0.8116	0.524	0.4422	0.5196
HC10-D7	0.1694	0.324	0.211	0.4068	0.2602	0.4924	0.3302	0.2426	0.308	0.3382	0.2236	0.2276	0.2576	0.4582	0.3604	0.2664	0.28	0.4556	0.3554	0.177	0.2536	0.6624	0.8622	0.416	0.351	0.6662	0.5166	0.7574	0.2152	0.5246	0.6106	0.4094	0.6592	0.3308	0.3352	0.1888	0.4102	0.2584	0.2398	0.2242	0.5712	0.2404	0.5774	0.323	0.4488	0.7146	0.2308	0.2144	0.2222
HT4-H0	0.326	0.4618	0.247	0.5298	0.3556	0.5642	0.3724	0.181	0.1712	0.4578	0.3216	0.2486	0.3412	0.4962	0.372	0.4078	0.4034	0.565	0.4354	0.2982	0.36	0.7834	0.9298	0.4952	0.5034	0.7882	0.6254	0.8184	0.3248	0.6476	0.7298	0.522	0.7826	0.4836	0.2538	0.3106	0.4324	0.3486	0.3644	0.3288	0.6914	0.342	0.7048	0.4262	0.6114	0.7788	0.2172	0.3498	0.3062
HT1-H0	0.2886	0.4806	0.3144	0.4308	0.3712	0.5638	0.1706	0.2902	0.3036	0.4686	0.32	0.3072	0.3302	0.503	0.3822	0.2964	0.418	0.57	0.4078	0.2472	0.2404	0.5752	0.8904	0.3494	0.384	0.58	0.4304	0.8006	0.1642	0.4904	0.6366	0.3238	0.5742	0.5266	0.3776	0.2194	0.474	0.3222	0.3964	0.3224	0.4926	0.2278	0.6172	0.2666	0.4338	0.761	0.269	0.2694	0.3274
HT14-H0	0.4416	0.5962	0.2862	0.6714	0.434	0.6168	0.4822	0.2598	0.159	0.5886	0.4244	0.2844	0.2956	0.5308	0.3088	0.5444	0.4374	0.6834	0.4368	0.3814	0.4526	0.8716	0.8956	0.5958	0.6192	0.8762	0.7136	0.812	0.4512	0.732	0.8422	0.6114	0.8692	0.5454	0.3426	0.4438	0.4156	0.474	0.391	0.432	0.8162	0.4698	0.8436	0.5738	0.7524	0.8118	0.3556	0.4852	0.3836
HT1-D5	0.555	0.7236	0.4024	0.7476	0.5168	0.6554	0.5384	0.3578	0.2936	0.6718	0.4686	0.3886	0.4704	0.566	0.3904	0.637	0.5596	0.7186	0.518	0.449	0.5156	0.9032	0.925	0.6412	0.6482	0.9054	0.743	0.8582	0.5384	0.7616	0.8496	0.642	0.8974	0.6606	0.4188	0.5224	0.4932	0.5194	0.4986	0.4656	0.8292	0.5736	0.85	0.65	0.76	0.8624	0.4196	0.5106	0.506
HC5-H0	0.1478	0.4162	0.2534	0.4724	0.27	0.54	0.3444	0.2426	0.292	0.3948	0.2534	0.2536	0.2488	0.5026	0.3646	0.346	0.3716	0.5	0.3212	0.2138	0.3008	0.7492	0.8928	0.5118	0.4142	0.754	0.5912	0.814	0.2964	0.6102	0.7006	0.4894	0.7466	0.4114	0.3862	0.2704	0.431	0.2764	0.3246	0.246	0.6558	0.3056	0.5282	0.3874	0.5334	0.7728	0.2776	0.2804	0.1796
HT5-H0	0.3316	0.5004	0.3506	0.4468	0.3958	0.5634	0.157	0.332	0.3476	0.4712	0.3272	0.3652	0.416	0.4814	0.4332	0.2892	0.475	0.563	0.4736	0.2738	0.2838	0.4696	0.917	0.3132	0.4074	0.4736	0.3752	0.7816	0.1752	0.4736	0.6214	0.2198	0.4688	0.5366	0.3704	0.24	0.4932	0.3428	0.4558	0.3362	0.3886	0.2904	0.6166	0.2628	0.3754	0.7384	0.3038	0.2646	0.3492
HT9-H0	0.373	0.5692	0.4604	0.493	0.467	0.6162	0.1862	0.403	0.415	0.5386	0.4274	0.4604	0.4608	0.562	0.47	0.3746	0.5146	0.6032	0.4692	0.3722	0.3174	0.4054	0.8794	0.3288	0.4056	0.4074	0.3984	0.8048	0.2598	0.484	0.6508	0.2166	0.4058	0.611	0.4892	0.3264	0.544	0.4354	0.5552	0.4272	0.3934	0.3252	0.6476	0.3358	0.4162	0.7708	0.409	0.3366	0.3888
HT11-D3	0.4316	0.6236	0.5116	0.5524	0.5106	0.6778	0.2348	0.4736	0.4918	0.5838	0.4654	0.5134	0.5534	0.598	0.5418	0.423	0.588	0.6584	0.5436	0.435	0.3696	0.3258	0.8978	0.325	0.4376	0.3286	0.3904	0.8352	0.2956	0.4798	0.6676	0.2078	0.326	0.6508	0.5228	0.3704	0.6002	0.4788	0.602	0.464	0.411	0.3934	0.6682	0.402	0.434	0.8052	0.451	0.3572	0.4496
HT10-H0	0.4368	0.4142	0.278	0.6146	0.4122	0.3982	0.4184	0.3272	0.3322	0.5484	0.3898	0.263	0.2694	0.5108	0.3566	0.5136	0.2724	0.477	0.4464	0.3466	0.471	0.8902	0.939	0.6432	0.6116	0.8944	0.739	0.817	0.4422	0.7506	0.8362	0.6312	0.8872	0.529	0.393	0.4184	0.4476	0.4042	0.3722	0.394	0.7922	0.4142	0.8038	0.3682	0.7114	0.82	0.3324	0.4696	0.4454
HT4-D5	0.9858	0.9704	0.9802	0.9718	0.9832	0.9796	0.9494	0.9862	0.9768	0.9854	0.9828	0.9786	0.9808	0.9864	0.9864	0.9498	0.9754	0.9814	0.9842	0.9832	0.9876	0.9912	0.9714	0.9874	0.9854	0.9924	0.9896	0.9326	0.98	0.9896	0.988	0.9874	0.9922	0.9754	0.9452	0.9872	0.9864	0.979	0.9838	0.9838	0.8124	0.9834	0.9834	0.9792	0.9864	0.8618	0.9848	0.9844	0.9852
HT7-D3	0.4508	0.6182	0.5252	0.542	0.5292	0.6836	0.2386	0.4844	0.5018	0.5852	0.4818	0.5316	0.5718	0.596	0.5704	0.4102	0.6062	0.6418	0.5766	0.4486	0.4022	0.365	0.913	0.3374	0.4776	0.364	0.3994	0.8318	0.3078	0.5248	0.6806	0.2458	0.3622	0.6306	0.5158	0.3906	0.6202	0.4976	0.6172	0.479	0.4156	0.4174	0.6698	0.3812	0.4506	0.7908	0.4532	0.3576	0.4672
HT12-D3	0.6854	0.7262	0.7474	0.627	0.7798	0.8584	0.4656	0.745	0.7574	0.734	0.7102	0.783	0.8062	0.8248	0.809	0.5984	0.8342	0.7558	0.7892	0.6516	0.637	0.1982	0.9692	0.5108	0.6196	0.1386	0.5242	0.8866	0.5562	0.5896	0.688	0.4172	0.2086	0.8062	0.7536	0.6278	0.8742	0.7068	0.8676	0.7074	0.4374	0.6228	0.683	0.5592	0.5094	0.8376	0.7178	0.6082	0.7148
HT15-D5	0.6532	0.7238	0.7442	0.599	0.7524	0.8564	0.4392	0.7108	0.7156	0.747	0.7082	0.7466	0.7692	0.8358	0.7772	0.5922	0.7936	0.77	0.754	0.653	0.6044	0.1982	0.919	0.5004	0.5872	0.149	0.5418	0.8778	0.533	0.6052	0.684	0.4304	0.2144	0.8068	0.7606	0.61	0.8424	0.715	0.8454	0.706	0.427	0.6014	0.6772	0.568	0.525	0.8256	0.699	0.5818	0.6826
HT11-D7	0.3924	0.5648	0.3938	0.5252	0.4486	0.635	0.2554	0.3462	0.4322	0.5198	0.362	0.3926	0.4874	0.5638	0.4942	0.3668	0.5628	0.572	0.5204	0.311	0.381	0.5138	0.972	0.3582	0.4124	0.5152	0.4088	0.8898	0.2956	0.5216	0.6538	0.2672	0.5118	0.5878	0.4068	0.3458	0.5162	0.3838	0.531	0.3582	0.4272	0.4132	0.5642	0.3434	0.3594	0.817	0.3598	0.2692	0.375
HC4-H0	0.1934	0.448	0.2654	0.52	0.2906	0.5526	0.385	0.2896	0.3264	0.4084	0.2688	0.2628	0.2686	0.53	0.3676	0.4016	0.4	0.5136	0.3368	0.2342	0.3498	0.7896	0.9076	0.552	0.455	0.793	0.6506	0.8222	0.3522	0.6512	0.7344	0.5428	0.7872	0.4518	0.4166	0.3156	0.4752	0.3094	0.3542	0.258	0.6968	0.3568	0.4904	0.4412	0.5758	0.7814	0.3174	0.341	0.232
HT12-D5	0.5576	0.714	0.5104	0.6558	0.6324	0.7676	0.2982	0.5638	0.5524	0.6674	0.4974	0.5674	0.5924	0.6888	0.5722	0.5306	0.6922	0.7332	0.5942	0.414	0.4588	0.314	0.9944	0.4142	0.5444	0.3146	0.4552	0.9128	0.4112	0.5304	0.7112	0.2986	0.3116	0.7642	0.5848	0.46	0.7176	0.5088	0.671	0.4936	0.4552	0.481	0.6886	0.481	0.4966	0.8454	0.5458	0.4746	0.5648
HT6-D5	0.4388	0.6622	0.3882	0.586	0.5172	0.7058	0.2476	0.3196	0.3064	0.62	0.392	0.3912	0.4416	0.6072	0.3944	0.4536	0.5928	0.6866	0.4774	0.3314	0.3416	0.5544	0.9104	0.3514	0.4492	0.557	0.414	0.8732	0.3136	0.5082	0.6936	0.3022	0.5528	0.6784	0.4266	0.3634	0.5046	0.4418	0.549	0.3866	0.5292	0.408	0.6824	0.4216	0.4726	0.8376	0.393	0.3584	0.4092
P8	0.342	0.5378	0.3316	0.5316	0.4306	0.654	0.3066	0.2456	0.2708	0.53	0.3858	0.3396	0.422	0.5582	0.4166	0.3698	0.491	0.6432	0.5184	0.3376	0.3246	0.653	0.892	0.3954	0.439	0.6552	0.4948	0.8118	0.2662	0.5216	0.6934	0.4024	0.6504	0.5522	0.2692	0.2962	0.4706	0.4316	0.4736	0.4018	0.6196	0.3336	0.6838	0.3892	0.55	0.7996	0.2828	0.3082	0.3666
HT10-D5	0.5548	0.6564	0.617	0.5996	0.6426	0.731	0.3434	0.5946	0.61	0.6258	0.5742	0.6398	0.6806	0.6864	0.6826	0.4566	0.7088	0.676	0.6768	0.5312	0.508	0.247	0.978	0.4226	0.5166	0.2508	0.4052	0.8888	0.4168	0.5526	0.682	0.3006	0.251	0.6878	0.596	0.5004	0.7314	0.5692	0.7284	0.5708	0.4106	0.505	0.658	0.4216	0.4402	0.8164	0.5678	0.4564	0.5774
HT1-D7	0.5404	0.6812	0.5676	0.6244	0.599	0.7576	0.3184	0.515	0.5174	0.6508	0.5178	0.5706	0.6312	0.655	0.621	0.4794	0.6972	0.6882	0.6544	0.4848	0.468	0.3242	0.9822	0.3278	0.5378	0.3256	0.4062	0.8976	0.3878	0.5556	0.706	0.275	0.324	0.71	0.5248	0.4524	0.6676	0.5238	0.6732	0.5166	0.4346	0.5082	0.6806	0.4316	0.461	0.8306	0.4974	0.4136	0.4932
HC4-D3	0.2878	0.5036	0.2664	0.4954	0.3396	0.5636	0.3488	0.1512	0.1852	0.466	0.2596	0.2364	0.3302	0.5068	0.3344	0.3814	0.441	0.55	0.394	0.2322	0.3162	0.75	0.9062	0.4764	0.4364	0.7524	0.5922	0.8224	0.315	0.6142	0.7062	0.4896	0.747	0.519	0.2836	0.2888	0.41	0.3194	0.3938	0.263	0.6574	0.3456	0.6376	0.4048	0.551	0.7804	0.239	0.2822	0.256
HT14-D5	0.498	0.6678	0.544	0.5996	0.5628	0.7272	0.2768	0.4894	0.5114	0.6306	0.4976	0.5474	0.5936	0.6206	0.59	0.4582	0.6576	0.6912	0.612	0.466	0.4264	0.3312	0.9516	0.3472	0.4918	0.331	0.4068	0.8814	0.345	0.527	0.6934	0.2498	0.3282	0.6852	0.5198	0.4134	0.632	0.5158	0.6406	0.4946	0.4462	0.4672	0.6822	0.4312	0.4672	0.8414	0.4646	0.3692	0.4884
HT13-D5	0.6332	0.6792	0.6988	0.6068	0.729	0.8106	0.4194	0.6928	0.7052	0.687	0.6582	0.732	0.761	0.7758	0.7592	0.547	0.7868	0.713	0.7464	0.6052	0.5848	0.2016	0.9678	0.4728	0.5728	0.1556	0.4786	0.885	0.5048	0.563	0.679	0.3712	0.219	0.7496	0.7012	0.576	0.8224	0.657	0.8164	0.655	0.4302	0.576	0.6702	0.5084	0.4626	0.8286	0.6646	0.5556	0.6632
HT1-D3	0.542	0.5368	0.5836	0.4902	0.6532	0.7418	0.3538	0.6356	0.642	0.6076	0.6222	0.6404	0.6346	0.7422	0.7208	0.4672	0.6442	0.6652	0.6998	0.5278	0.5518	0.263	0.9458	0.4924	0.5706	0.2656	0.5268	0.826	0.429	0.5874	0.6512	0.4138	0.264	0.6338	0.6482	0.5072	0.7894	0.6116	0.6934	0.626	0.3912	0.4634	0.6386	0.439	0.4692	0.7784	0.579	0.5332	0.6206
HT6-D7	0.5468	0.6546	0.5696	0.5982	0.609	0.7524	0.3004	0.5318	0.5236	0.651	0.5272	0.579	0.6246	0.6656	0.6284	0.4772	0.6826	0.6802	0.6472	0.4834	0.4756	0.3634	0.9648	0.3	0.5262	0.3674	0.4316	0.8634	0.3912	0.5498	0.687	0.2896	0.3648	0.713	0.5374	0.4562	0.6828	0.5336	0.6864	0.5312	0.421	0.5048	0.675	0.4428	0.4674	0.8184	0.5148	0.4254	0.5022
HT13-D7	0.4572	0.6062	0.6482	0.564	0.6028	0.7732	0.582	0.6138	0.6726	0.6228	0.593	0.6468	0.6416	0.7988	0.7072	0.5376	0.7024	0.647	0.6122	0.5288	0.5862	0.7238	0.8548	0.6634	0.5414	0.7278	0.7188	0.8414	0.5952	0.6994	0.6514	0.6886	0.7232	0.6526	0.7202	0.5876	0.7522	0.6076	0.7308	0.5728	0.45	0.5946	0.446	0.6066	0.594	0.667	0.6498	0.5288	0.4886
HT8-H0	0.3396	0.4302	0.1762	0.559	0.3516	0.56	0.4064	0.2348	0.2486	0.4702	0.3138	0.2176	0.2836	0.5028	0.2876	0.4332	0.3398	0.5666	0.394	0.2658	0.3758	0.8102	0.9132	0.5678	0.518	0.8138	0.6598	0.8116	0.3576	0.6726	0.7568	0.5502	0.808	0.3948	0.323	0.3354	0.4328	0.359	0.2512	0.3178	0.7198	0.3672	0.7246	0.4642	0.6326	0.7726	0.283	0.3882	0.3608
HT10-D3	0.7496	0.6528	0.7488	0.7484	0.8072	0.8832	0.74	0.7726	0.7844	0.7592	0.7114	0.8092	0.8328	0.8528	0.7544	0.7448	0.8584	0.7826	0.8144	0.7438	0.748	0.78	0.9262	0.7456	0.5788	0.7838	0.7666	0.7622	0.742	0.747	0.7656	0.7458	0.7786	0.7434	0.7806	0.7478	0.8612	0.751	0.8908	0.7542	0.7644	0.7448	0.7806	0.7508	0.7614	0.8428	0.7508	0.7438	0.754
HT13-D3	0.9528	0.9516	0.9504	0.951	0.9512	0.9522	0.9506	0.9514	0.9518	0.951	0.951	0.9524	0.9518	0.9524	0.9518	0.9518	0.952	0.9514	0.9508	0.9516	0.9524	0.9838	0.928	0.9544	0.9558	0.9844	0.968	0.9512	0.9514	0.9606	0.9524	0.956	0.9798	0.949	0.9478	0.9532	0.9522	0.9506	0.9516	0.952	0.9594	0.9522	0.9758	0.9524	0.9568	0.9738	0.9512	0.95	0.9502
HT5-D5	0.9226	0.866	0.937	0.945	0.933	0.9646	0.9436	0.895	0.8934	0.9694	0.9266	0.931	0.8558	0.9702	0.8204	0.9634	0.9292	0.9782	0.8938	0.9656	0.9168	0.9916	0.8734	0.9504	0.7542	0.9948	0.9938	0.8208	0.9448	0.9728	0.9794	0.9752	0.9936	0.87	0.9774	0.943	0.7072	0.9768	0.94	0.9622	0.9906	0.9424	0.9912	0.982	0.9898	0.995	0.9424	0.9354	0.864
HT9-D7	0.7354	0.8538	0.68	0.8996	0.6994	0.7808	0.732	0.6216	0.6452	0.7874	0.6786	0.6542	0.7062	0.7022	0.6748	0.7742	0.7466	0.8366	0.7462	0.6968	0.7146	0.9608	0.9292	0.7608	0.7996	0.9612	0.7996	0.9138	0.712	0.8526	0.9152	0.7376	0.9546	0.7932	0.603	0.708	0.6492	0.6982	0.68	0.677	0.9342	0.7692	0.9494	0.7696	0.8656	0.95	0.6282	0.6732	0.6902
HT14-D3	0.7142	0.7936	0.7178	0.8262	0.6962	0.7248	0.767	0.7058	0.714	0.7138	0.702	0.7056	0.71	0.6912	0.6982	0.7234	0.7178	0.771	0.715	0.731	0.7104	0.9234	0.822	0.7454	0.7364	0.9288	0.7776	0.8348	0.7114	0.7682	0.8826	0.7274	0.92	0.7502	0.7152	0.712	0.7042	0.7158	0.708	0.7104	0.8866	0.7252	0.9562	0.7456	0.8066	0.8982	0.7046	0.7194	0.7088
[truncated: 76 more columns]

## Sheet: Unweighted_unifrac_DM
	HC1-D5	HC10-D5	HC11-D5	HC12-D3	HC12-D5	HC12-H0	HC13-D7	HC14-D3	HC14-H0	HC2-D7	HC3-D5	HC5-D3	HC5-D5	HC6-D3	HC6-D5	HC7-D5	HC7-D7	HC7-H0	HC8-D7	HC8-H0	HC9-D5	HT2-D3	HT2-D5	HT3-D7	HT5-D7	HT6-D3	HT7-D5	HT7-D7	HT7-H0	HT8-D3	HT8-D5	HT8-D7	HT9-D3	P10	P3	HC12-D7	HC13-D3	HC3-D7	HC6-D7	HC8-D5	HT12-D7	HT12-H0	HT14-D7	HT6-H0	HT9-D5	P1	P6	HC14-D5	HC15-D3
HC1-D5	0	0.282158	0.298832	0.312036	0.249566	0.310007	0.269346	0.276418	0.31091	0.306845	0.294914	0.296268	0.318655	0.318965	0.211331	0.298823	0.363529	0.272318	0.302772	0.274979	0.237784	0.436369	0.49484	0.320093	0.295696	0.542407	0.447842	0.363783	0.220087	0.39041	0.447709	0.336231	0.432146	0.37797	0.320635	0.194802	0.310199	0.295653	0.314352	0.324056	0.380487	0.303877	0.374868	0.284574	0.307688	0.434277	0.34549	0.25005	0.295945
HC10-D5	0.282158	0	0.248641	0.250576	0.244682	0.245704	0.248547	0.349455	0.318527	0.250041	0.24943	0.184396	0.206298	0.295355	0.208875	0.311672	0.239418	0.164044	0.324792	0.202477	0.263394	0.394619	0.467186	0.310062	0.317805	0.511671	0.467394	0.349206	0.184592	0.36834	0.536554	0.332721	0.443691	0.263088	0.296195	0.337764	0.295389	0.264543	0.25268	0.293821	0.331634	0.169854	0.367329	0.213945	0.39507	0.358909	0.263329	0.22857	0.196125
HC11-D5	0.298832	0.248641	0	0.297351	0.206701	0.251173	0.214087	0.292989	0.350501	0.264104	0.303297	0.269756	0.256786	0.207515	0.251583	0.268953	0.286066	0.255719	0.311067	0.234476	0.378498	0.425153	0.423049	0.300638	0.350952	0.514999	0.443628	0.273953	0.215101	0.340577	0.496077	0.406127	0.418216	0.228743	0.2348	0.376248	0.338575	0.244068	0.261375	0.324405	0.364294	0.311069	0.410304	0.243492	0.397199	0.413256	0.233059	0.230271	0.244984
HC12-D3	0.312036	0.250576	0.297351	0	0.256282	0.273111	0.329618	0.355114	0.366046	0.241402	0.226575	0.221575	0.267259	0.246349	0.288957	0.273178	0.195408	0.182107	0.278458	0.225111	0.253068	0.308101	0.417293	0.265808	0.314164	0.451514	0.411886	0.28365	0.217477	0.280567	0.502085	0.315534	0.3655	0.259301	0.262725	0.349541	0.315896	0.229343	0.258877	0.276504	0.24188	0.176409	0.305462	0.226672	0.32634	0.293111	0.241126	0.242547	0.21417
HC12-D5	0.249566	0.244682	0.206701	0.256282	0	0.226108	0.239761	0.271024	0.345202	0.248439	0.25851	0.22367	0.18985	0.216538	0.231075	0.182992	0.277895	0.209934	0.254069	0.239339	0.291759	0.406895	0.402821	0.195264	0.285109	0.443842	0.424919	0.250067	0.174643	0.303409	0.461704	0.354071	0.404166	0.258906	0.18542	0.310471	0.299599	0.167966	0.245468	0.300293	0.335522	0.256499	0.361212	0.2199	0.311387	0.393467	0.198619	0.139123	0.194663
HC12-H0	0.310007	0.245704	0.251173	0.273111	0.226108	0	0.255237	0.311202	0.318385	0.259527	0.347498	0.218614	0.258884	0.302017	0.273837	0.299033	0.246617	0.223278	0.245944	0.247902	0.341825	0.451582	0.502078	0.346146	0.373088	0.522706	0.446135	0.359056	0.169774	0.449251	0.53753	0.35198	0.445163	0.356922	0.281642	0.370251	0.343281	0.292647	0.227246	0.260097	0.342689	0.283681	0.36254	0.161837	0.34489	0.365425	0.24341	0.289311	0.268696
HC13-D7	0.269346	0.248547	0.214087	0.329618	0.239761	0.255237	0	0.298648	0.314398	0.33	0.347166	0.262644	0.225391	0.307049	0.318055	0.240381	0.323447	0.289802	0.287597	0.281943	0.369082	0.426497	0.519216	0.311007	0.396549	0.475308	0.453621	0.308293	0.185602	0.38978	0.461385	0.369949	0.447867	0.307224	0.250391	0.384973	0.420556	0.28315	0.308461	0.299555	0.377775	0.293493	0.358052	0.224388	0.363194	0.421481	0.232813	0.232827	0.2895
HC14-D3	0.276418	0.349455	0.292989	0.355114	0.271024	0.311202	0.298648	0	0.232365	0.338867	0.275761	0.332768	0.363234	0.356974	0.323062	0.329908	0.355822	0.32459	0.287735	0.304598	0.334647	0.455461	0.535833	0.316804	0.248931	0.553467	0.313692	0.340391	0.238071	0.418382	0.439591	0.261279	0.423168	0.374705	0.284515	0.231428	0.373734	0.317604	0.308608	0.302815	0.366255	0.363959	0.387519	0.314834	0.25972	0.442317	0.287745	0.283297	0.283862
HC14-H0	0.31091	0.318527	0.350501	0.366046	0.345202	0.318385	0.314398	0.232365	0	0.391141	0.306304	0.294719	0.341686	0.377423	0.350037	0.374512	0.380675	0.294375	0.342833	0.264448	0.343058	0.478778	0.554974	0.360772	0.25663	0.53253	0.371902	0.444955	0.284632	0.450906	0.507969	0.198764	0.506515	0.367772	0.317024	0.26713	0.364979	0.355724	0.343009	0.311994	0.338379	0.333337	0.348989	0.270722	0.297665	0.40649	0.375787	0.295265	0.27905
HC2-D7	0.306845	0.250041	0.264104	0.241402	0.248439	0.259527	0.33	0.338867	0.391141	0	0.273218	0.268667	0.303219	0.281253	0.268978	0.247476	0.301493	0.199199	0.224955	0.270362	0.293922	0.329946	0.434296	0.294593	0.326936	0.456424	0.399371	0.262111	0.224696	0.35847	0.442905	0.377941	0.331924	0.315644	0.305915	0.380424	0.328276	0.282173	0.235417	0.285248	0.321492	0.264412	0.361897	0.270555	0.329059	0.331943	0.290154	0.271997	0.273569
HC3-D5	0.294914	0.24943	0.303297	0.226575	0.25851	0.347498	0.347166	0.275761	0.306304	0.273218	0	0.253159	0.305229	0.317236	0.265311	0.292728	0.273483	0.22767	0.283642	0.242516	0.24211	0.320478	0.440604	0.171566	0.200571	0.415602	0.344236	0.260252	0.242038	0.267264	0.451311	0.244846	0.327945	0.237732	0.246431	0.296013	0.282019	0.235991	0.280106	0.242002	0.202422	0.206251	0.255512	0.286741	0.260428	0.330415	0.272808	0.214489	0.201346
HC5-D3	0.296268	0.184396	0.269756	0.221575	0.22367	0.218614	0.262644	0.332768	0.294719	0.268667	0.253159	0	0.234838	0.241688	0.210916	0.229575	0.216274	0.184851	0.257616	0.169558	0.252447	0.371485	0.492544	0.270161	0.327694	0.492423	0.414948	0.353438	0.177017	0.368586	0.507936	0.283207	0.449367	0.29895	0.269269	0.310016	0.298872	0.258978	0.208393	0.239249	0.278502	0.175408	0.342944	0.194936	0.309388	0.333636	0.235245	0.217982	0.202807
HC5-D5	0.318655	0.206298	0.256786	0.267259	0.18985	0.258884	0.225391	0.363234	0.341686	0.303219	0.305229	0.234838	0	0.274409	0.270171	0.265259	0.23581	0.18384	0.297286	0.230453	0.302897	0.416576	0.441739	0.246737	0.345853	0.462605	0.51527	0.332474	0.230117	0.385898	0.523659	0.343965	0.48753	0.24066	0.237449	0.373708	0.337119	0.221833	0.278853	0.340588	0.379527	0.221563	0.352723	0.249931	0.404655	0.365539	0.241512	0.192179	0.25933
HC6-D3	0.318965	0.295355	0.207515	0.246349	0.216538	0.302017	0.307049	0.356974	0.377423	0.281253	0.317236	0.241688	0.274409	0	0.290437	0.242841	0.27035	0.268787	0.313019	0.262597	0.297018	0.383381	0.394019	0.255292	0.380189	0.473909	0.454844	0.290895	0.266025	0.269218	0.468168	0.387736	0.434985	0.249384	0.260621	0.319136	0.273432	0.252064	0.234555	0.339104	0.338196	0.284757	0.403452	0.317773	0.390404	0.362073	0.23795	0.225881	0.260798
HC6-D5	0.211331	0.208875	0.251583	0.288957	0.231075	0.273837	0.318055	0.323062	0.350037	0.268978	0.265311	0.210916	0.270171	0.290437	0	0.319564	0.288461	0.242705	0.307125	0.222542	0.226945	0.452714	0.486292	0.330994	0.341076	0.558949	0.464736	0.330561	0.212427	0.376175	0.493132	0.3549	0.44114	0.299834	0.263426	0.279437	0.260262	0.311118	0.237251	0.260899	0.376878	0.249412	0.423029	0.273607	0.386392	0.406865	0.278427	0.240313	0.20443
HC7-D5	0.298823	0.311672	0.268953	0.273178	0.182992	0.299033	0.240381	0.329908	0.374512	0.247476	0.292728	0.229575	0.265259	0.242841	0.319564	0	0.317404	0.299681	0.232521	0.312767	0.323089	0.353089	0.448134	0.224355	0.388236	0.392581	0.389586	0.271099	0.227811	0.342775	0.421674	0.362466	0.370932	0.267551	0.240508	0.345972	0.360178	0.233987	0.266461	0.286504	0.301262	0.295564	0.359099	0.276497	0.299627	0.397247	0.244153	0.224807	0.291628
HC7-D7	0.363529	0.239418	0.286066	0.195408	0.277895	0.246617	0.323447	0.355822	0.380675	0.301493	0.273483	0.216274	0.23581	0.27035	0.288461	0.317404	0	0.241474	0.283745	0.23953	0.279115	0.383489	0.465343	0.307929	0.354889	0.515479	0.444652	0.337634	0.253331	0.382147	0.562896	0.351883	0.444657	0.267599	0.279023	0.392538	0.302562	0.273719	0.234774	0.290443	0.334759	0.199608	0.384672	0.235624	0.370051	0.345157	0.200129	0.290155	0.239583
HC7-H0	0.272318	0.164044	0.255719	0.182107	0.209934	0.223278	0.289802	0.32459	0.294375	0.199199	0.22767	0.184851	0.18384	0.268787	0.242705	0.299681	0.241474	0	0.25841	0.182576	0.250983	0.340614	0.435773	0.259979	0.269376	0.459594	0.430181	0.31651	0.166565	0.328899	0.500008	0.287318	0.405759	0.271114	0.25628	0.31014	0.295632	0.214985	0.246859	0.274569	0.27225	0.181218	0.295444	0.190063	0.325128	0.26594	0.254636	0.190327	0.205538
HC8-D7	0.302772	0.324792	0.311067	0.278458	0.254069	0.245944	0.287597	0.287735	0.342833	0.224955	0.283642	0.257616	0.297286	0.313019	0.307125	0.232521	0.283745	0.25841	0	0.286327	0.357773	0.340553	0.474025	0.317206	0.35927	0.454488	0.365754	0.266766	0.247975	0.397729	0.466182	0.366145	0.40939	0.325043	0.264556	0.368531	0.347563	0.309621	0.22123	0.258394	0.326141	0.312967	0.359537	0.276524	0.308164	0.377171	0.250477	0.268103	0.309939
HC8-H0	0.274979	0.202477	0.234476	0.225111	0.239339	0.247902	0.281943	0.304598	0.264448	0.270362	0.242516	0.169558	0.230453	0.262597	0.222542	0.312767	0.23953	0.182576	0.286327	0	0.280442	0.377399	0.478555	0.286312	0.296329	0.472724	0.441633	0.363064	0.179184	0.365299	0.539002	0.312063	0.438813	0.285742	0.259217	0.333109	0.310843	0.229953	0.237657	0.275241	0.301098	0.172599	0.286734	0.199715	0.349794	0.323683	0.257118	0.204258	0.194813
HC9-D5	0.237784	0.263394	0.378498	0.253068	0.291759	0.341825	0.369082	0.334647	0.343058	0.293922	0.24211	0.252447	0.302897	0.297018	0.226945	0.323089	0.279115	0.250983	0.357773	0.280442	0	0.413253	0.492237	0.262593	0.305278	0.528481	0.437791	0.371194	0.263264	0.368915	0.467131	0.256782	0.441736	0.313774	0.289055	0.250275	0.24473	0.277176	0.288386	0.316656	0.350395	0.206406	0.390678	0.288487	0.306318	0.397402	0.284893	0.271735	0.232191
HT2-D3	0.436369	0.394619	0.425153	0.308101	0.406895	0.451582	0.426497	0.455461	0.478778	0.329946	0.320478	0.371485	0.416576	0.383381	0.452714	0.353089	0.383489	0.340614	0.340553	0.377399	0.413253	0	0.476171	0.305635	0.388385	0.325683	0.335282	0.351585	0.377181	0.279715	0.413742	0.410118	0.282266	0.364711	0.412099	0.465552	0.468529	0.368146	0.423528	0.403766	0.303952	0.340459	0.304555	0.38835	0.378203	0.293211	0.398177	0.36672	0.365887
HT2-D5	0.49484	0.467186	0.423049	0.417293	0.402821	0.502078	0.519216	0.535833	0.554974	0.434296	0.440604	0.492544	0.441739	0.394019	0.486292	0.448134	0.465343	0.435773	0.474025	0.478555	0.492237	0.476171	0	0.420877	0.455163	0.499491	0.5492	0.33244	0.497048	0.401489	0.495701	0.540494	0.509953	0.368355	0.436368	0.522191	0.34752	0.387855	0.438562	0.473072	0.447628	0.447279	0.488969	0.526498	0.501095	0.438852	0.441969	0.402169	0.433961
HT3-D7	0.320093	0.310062	0.300638	0.265808	0.195264	0.346146	0.311007	0.316804	0.360772	0.294593	0.171566	0.270161	0.246737	0.255292	0.330994	0.224355	0.307929	0.259979	0.317206	0.286312	0.262593	0.305635	0.420877	0	0.225804	0.369677	0.376459	0.253179	0.254412	0.235992	0.409606	0.277087	0.363803	0.260903	0.210429	0.297364	0.326454	0.188506	0.323324	0.27486	0.242173	0.253417	0.26606	0.285628	0.248419	0.322606	0.232914	0.170593	0.240379
HT5-D7	0.295696	0.317805	0.350952	0.314164	0.285109	0.373088	0.396549	0.248931	0.25663	0.326936	0.200571	0.327694	0.345853	0.380189	0.341076	0.388236	0.354889	0.269376	0.35927	0.296329	0.305278	0.388385	0.455163	0.225804	0	0.503882	0.344746	0.358792	0.283576	0.3429	0.42815	0.223806	0.410781	0.3597	0.322531	0.237613	0.31688	0.304149	0.393007	0.33658	0.309994	0.317609	0.2989	0.32288	0.209927	0.375346	0.351558	0.252745	0.254127
HT6-D3	0.542407	0.511671	0.514999	0.451514	0.443842	0.522706	0.475308	0.553467	0.53253	0.456424	0.415602	0.492423	0.462605	0.473909	0.558949	0.392581	0.515479	0.459594	0.454488	0.472724	0.528481	0.325683	0.499491	0.369677	0.503882	0	0.413101	0.444665	0.490263	0.352997	0.418112	0.464868	0.327207	0.434692	0.448766	0.541219	0.56237	0.396982	0.528188	0.443724	0.39082	0.454512	0.359519	0.473228	0.459672	0.399063	0.474515	0.435099	0.483132
HT7-D5	0.447842	0.467394	0.443628	0.411886	0.424919	0.446135	0.453621	0.313692	0.371902	0.399371	0.344236	0.414948	0.51527	0.454844	0.464736	0.389586	0.444652	0.430181	0.365754	0.441633	0.437791	0.335282	0.5492	0.376459	0.344746	0.413101	0	0.392079	0.396394	0.376421	0.334153	0.285562	0.309947	0.422039	0.415217	0.39407	0.462071	0.447831	0.428008	0.34193	0.332419	0.413874	0.392907	0.415081	0.232229	0.412749	0.405996	0.429238	0.41516
HT7-D7	0.363783	0.349206	0.273953	0.28365	0.250067	0.359056	0.308293	0.340391	0.444955	0.262111	0.260252	0.353438	0.332474	0.290895	0.330561	0.271099	0.337634	0.31651	0.266766	0.363064	0.371194	0.351585	0.33244	0.253179	0.358792	0.444665	0.392079	0	0.308508	0.284537	0.4246	0.417428	0.373854	0.223886	0.246869	0.425479	0.309913	0.287036	0.27383	0.308051	0.33538	0.311365	0.391431	0.35607	0.361774	0.392623	0.234633	0.264088	0.307012
HT7-H0	0.220087	0.184592	0.215101	0.217477	0.174643	0.169774	0.185602	0.238071	0.284632	0.224696	0.242038	0.177017	0.230117	0.266025	0.212427	0.227811	0.253331	0.166565	0.247975	0.179184	0.263264	0.377181	0.497048	0.254412	0.283576	0.490263	0.396394	0.308508	0	0.372656	0.476856	0.280776	0.367963	0.312276	0.22806	0.277175	0.316434	0.235746	0.21763	0.247914	0.304639	0.187985	0.316813	0.154068	0.27461	0.34176	0.216308	0.209071	0.200139
HT8-D3	0.39041	0.36834	0.340577	0.280567	0.303409	0.449251	0.38978	0.418382	0.450906	0.35847	0.267264	0.368586	0.385898	0.269218	0.376175	0.342775	0.382147	0.328899	0.397729	0.365299	0.368915	0.279715	0.401489	0.235992	0.3429	0.352997	0.376421	0.284537	0.372656	0	0.408786	0.402696	0.314812	0.30378	0.317105	0.382214	0.392606	0.283005	0.403994	0.325343	0.286153	0.322561	0.331916	0.416825	0.387129	0.33286	0.32086	0.284906	0.301745
HT8-D5	0.447709	0.536554	0.496077	0.502085	0.461704	0.53753	0.461385	0.439591	0.507969	0.442905	0.451311	0.507936	0.523659	0.468168	0.493132	0.421674	0.562896	0.500008	0.466182	0.539002	0.467131	0.413742	0.495701	0.409606	0.42815	0.418112	0.334153	0.4246	0.476856	0.408786	0	0.441315	0.348322	0.480469	0.439826	0.421645	0.5374	0.4691	0.527121	0.462371	0.435304	0.501145	0.455134	0.502961	0.367814	0.468359	0.486845	0.460561	0.516569
HT8-D7	0.336231	0.332721	0.406127	0.315534	0.354071	0.35198	0.369949	0.261279	0.198764	0.377941	0.244846	0.283207	0.343965	0.387736	0.3549	0.362466	0.351883	0.287318	0.366145	0.312063	0.256782	0.410118	0.540494	0.277087	0.223806	0.464868	0.285562	0.417428	0.280776	0.402696	0.441315	0	0.439302	0.382606	0.303318	0.263571	0.329536	0.316732	0.358703	0.285319	0.312723	0.273883	0.335414	0.279693	0.210047	0.353826	0.339981	0.314952	0.302626
HT9-D3	0.432146	0.443691	0.418216	0.3655	0.404166	0.445163	0.447867	0.423168	0.506515	0.331924	0.327945	0.449367	0.48753	0.434985	0.44114	0.370932	0.444657	0.405759	0.40939	0.438813	0.441736	0.282266	0.509953	0.363803	0.410781	0.327207	0.309947	0.373854	0.367963	0.314812	0.348322	0.439302	0	0.42016	0.409273	0.464548	0.491938	0.406942	0.424373	0.40217	0.322933	0.414047	0.352104	0.39428	0.382802	0.378048	0.443245	0.427871	0.408357
P10	0.37797	0.263088	0.228743	0.259301	0.258906	0.356922	0.307224	0.374705	0.367772	0.315644	0.237732	0.29895	0.24066	0.249384	0.299834	0.267551	0.267599	0.271114	0.325043	0.285742	0.313774	0.364711	0.368355	0.260903	0.3597	0.434692	0.422039	0.223886	0.312276	0.30378	0.480469	0.382606	0.42016	0	0.245734	0.409047	0.293907	0.230485	0.253603	0.320903	0.322742	0.247327	0.364885	0.310231	0.401002	0.363455	0.251469	0.238587	0.226957
P3	0.320635	0.296195	0.2348	0.262725	0.18542	0.281642	0.250391	0.284515	0.317024	0.305915	0.246431	0.269269	0.237449	0.260621	0.263426	0.240508	0.279023	0.25628	0.264556	0.259217	0.289055	0.412099	0.436368	0.210429	0.322531	0.448766	0.415217	0.246869	0.22806	0.317105	0.439826	0.303318	0.409273	0.245734	0	0.340666	0.302382	0.214912	0.244186	0.223655	0.329237	0.278074	0.357314	0.240147	0.309519	0.370574	0.166142	0.194876	0.230493
HC12-D7	0.194802	0.337764	0.376248	0.349541	0.310471	0.370251	0.384973	0.231428	0.26713	0.380424	0.296013	0.310016	0.373708	0.319136	0.279437	0.345972	0.392538	0.31014	0.368531	0.333109	0.250275	0.465552	0.522191	0.297364	0.237613	0.541219	0.39407	0.425479	0.277175	0.382214	0.421645	0.263571	0.464548	0.409047	0.340666	0	0.336165	0.310686	0.367035	0.317036	0.371948	0.333058	0.398574	0.386061	0.267545	0.440886	0.374065	0.285453	0.293853
HC13-D3	0.310199	0.295389	0.338575	0.315896	0.299599	0.343281	0.420556	0.373734	0.364979	0.328276	0.282019	0.298872	0.337119	0.273432	0.260262	0.360178	0.302562	0.295632	0.347563	0.310843	0.24473	0.468529	0.34752	0.326454	0.31688	0.56237	0.462071	0.309913	0.316434	0.392606	0.5374	0.329536	0.491938	0.293907	0.302382	0.336165	0	0.321639	0.259409	0.301037	0.378406	0.288877	0.441167	0.345624	0.371541	0.433423	0.305311	0.312941	0.240089
HC3-D7	0.295653	0.264543	0.244068	0.229343	0.167966	0.292647	0.28315	0.317604	0.355724	0.282173	0.235991	0.258978	0.221833	0.252064	0.311118	0.233987	0.273719	0.214985	0.309621	0.229953	0.277176	0.368146	0.387855	0.188506	0.304149	0.396982	0.447831	0.287036	0.235746	0.283005	0.4691	0.316732	0.406942	0.230485	0.214912	0.310686	0.321639	0	0.326317	0.274095	0.291504	0.216868	0.302868	0.249113	0.335536	0.355387	0.227956	0.147046	0.217951
HC6-D7	0.314352	0.25268	0.261375	0.258877	0.245468	0.227246	0.308461	0.308608	0.343009	0.235417	0.280106	0.208393	0.278853	0.234555	0.237251	0.266461	0.234774	0.246859	0.22123	0.237657	0.288386	0.423528	0.438562	0.323324	0.393007	0.528188	0.428008	0.27383	0.21763	0.403994	0.527121	0.358703	0.424373	0.253603	0.244186	0.367035	0.259409	0.326317	0	0.253047	0.328272	0.223681	0.414621	0.258302	0.347284	0.375501	0.228959	0.285126	0.243347
HC8-D5	0.324056	0.293821	0.324405	0.276504	0.300293	0.260097	0.299555	0.302815	0.311994	0.285248	0.242002	0.239249	0.340588	0.339104	0.260899	0.286504	0.290443	0.274569	0.258394	0.275241	0.316656	0.403766	0.473072	0.27486	0.33658	0.443724	0.34193	0.308051	0.247914	0.325343	0.462371	0.285319	0.40217	0.320903	0.223655	0.317036	0.301037	0.274095	0.253047	0	0.236465	0.243025	0.297933	0.259572	0.249577	0.310879	0.243644	0.292377	0.234621
HT12-D7	0.380487	0.331634	0.364294	0.24188	0.335522	0.342689	0.377775	0.366255	0.338379	0.321492	0.202422	0.278502	0.379527	0.338196	0.376878	0.301262	0.334759	0.27225	0.326141	0.301098	0.350395	0.303952	0.447628	0.242173	0.309994	0.39082	0.332419	0.33538	0.304639	0.286153	0.435304	0.312723	0.322933	0.322742	0.329237	0.371948	0.378406	0.291504	0.328272	0.236465	0	0.266135	0.177745	0.288214	0.251649	0.226071	0.331034	0.311212	0.27309
HT12-H0	0.303877	0.169854	0.311069	0.176409	0.256499	0.283681	0.293493	0.363959	0.333337	0.264412	0.206251	0.175408	0.221563	0.284757	0.249412	0.295564	0.199608	0.181218	0.312967	0.172599	0.206406	0.340459	0.447279	0.253417	0.317609	0.454512	0.413874	0.311365	0.187985	0.322561	0.501145	0.273883	0.414047	0.247327	0.278074	0.333058	0.288877	0.216868	0.223681	0.243025	0.266135	0	0.315128	0.233681	0.316986	0.318142	0.256284	0.232516	0.202111
HT14-D7	0.374868	0.367329	0.410304	0.305462	0.361212	0.36254	0.358052	0.387519	0.348989	0.361897	0.255512	0.342944	0.352723	0.403452	0.423029	0.359099	0.384672	0.295444	0.359537	0.286734	0.390678	0.304555	0.488969	0.26606	0.2989	0.359519	0.392907	0.391431	0.316813	0.331916	0.455134	0.335414	0.352104	0.364885	0.357314	0.398574	0.441167	0.302868	0.414621	0.297933	0.177745	0.315128	0	0.285394	0.29224	0.219573	0.397006	0.323769	0.336551
HT6-H0	0.284574	0.213945	0.243492	0.226672	0.2199	0.161837	0.224388	0.314834	0.270722	0.270555	0.286741	0.194936	0.249931	0.317773	0.273607	0.276497	0.235624	0.190063	0.276524	0.199715	0.288487	0.38835	0.526498	0.285628	0.32288	0.473228	0.415081	0.35607	0.154068	0.416825	0.502961	0.279693	0.39428	0.310231	0.240147	0.386061	0.345624	0.249113	0.258302	0.259572	0.288214	0.233681	0.285394	0	0.289335	0.311332	0.244714	0.277946	0.219817
HT9-D5	0.307688	0.39507	0.397199	0.32634	0.311387	0.34489	0.363194	0.25972	0.297665	0.329059	0.260428	0.309388	0.404655	0.390404	0.386392	0.299627	0.370051	0.325128	0.308164	0.349794	0.306318	0.378203	0.501095	0.248419	0.209927	0.459672	0.232229	0.361774	0.27461	0.387129	0.367814	0.210047	0.382802	0.401002	0.309519	0.267545	0.371541	0.335536	0.347284	0.249577	0.251649	0.316986	0.29224	0.289335	0	0.344735	0.342642	0.335365	0.345631
P1	0.434277	0.358909	0.413256	0.293111	0.393467	0.365425	0.421481	0.442317	0.40649	0.331943	0.330415	0.333636	0.365539	0.362073	0.406865	0.397247	0.345157	0.26594	0.377171	0.323683	0.397402	0.293211	0.438852	0.322606	0.375346	0.399063	0.412749	0.392623	0.34176	0.33286	0.468359	0.353826	0.378048	0.363455	0.370574	0.440886	0.433423	0.355387	0.375501	0.310879	0.226071	0.318142	0.219573	0.311332	0.344735	0	0.38344	0.385351	0.360454
P6	0.34549	0.263329	0.233059	0.241126	0.198619	0.24341	0.232813	0.287745	0.375787	0.290154	0.272808	0.235245	0.241512	0.23795	0.278427	0.244153	0.200129	0.254636	0.250477	0.257118	0.284893	0.398177	0.441969	0.232914	0.351558	0.474515	0.405996	0.234633	0.216308	0.32086	0.486845	0.339981	0.443245	0.251469	0.166142	0.374065	0.305311	0.227956	0.228959	0.243644	0.331034	0.256284	0.397006	0.244714	0.342642	0.38344	0	0.206029	0.225807
HC14-D5	0.25005	0.22857	0.230271	0.242547	0.139123	0.289311	0.232827	0.283297	0.295265	0.271997	0.214489	0.217982	0.192179	0.225881	0.240313	0.224807	0.290155	0.190327	0.268103	0.204258	0.271735	0.36672	0.402169	0.170593	0.252745	0.435099	0.429238	0.264088	0.209071	0.284906	0.460561	0.314952	0.427871	0.238587	0.194876	0.285453	0.312941	0.147046	0.285126	0.292377	0.311212	0.232516	0.323769	0.277946	0.335365	0.385351	0.206029	0	0.192497
HC15-D3	0.295945	0.196125	0.244984	0.21417	0.194663	0.268696	0.2895	0.283862	0.27905	0.273569	0.201346	0.202807	0.25933	0.260798	0.20443	0.291628	0.239583	0.205538	0.309939	0.194813	0.232191	0.365887	0.433961	0.240379	0.254127	0.483132	0.41516	0.307012	0.200139	0.301745	0.516569	0.302626	0.408357	0.226957	0.230493	0.293853	0.240089	0.217951	0.243347	0.234621	0.27309	0.202111	0.336551	0.219817	0.345631	0.360454	0.225807	0.192497	0
HC2-D5	0.184237	0.282867	0.287592	0.345912	0.235313	0.268923	0.248039	0.271699	0.316022	0.268267	0.300498	0.273394	0.326901	0.30298	0.20769	0.291689	0.362759	0.268808	0.277331	0.254604	0.253421	0.435742	0.548129	0.309027	0.352794	0.5579	0.460453	0.340554	0.18404	0.410144	0.466294	0.370568	0.424114	0.376103	0.269426	0.27577	0.353885	0.274734	0.296682	0.311987	0.375167	0.310526	0.385863	0.254484	0.365491	0.450583	0.303186	0.230893	0.252666
HC3-H0	0.236258	0.210838	0.244229	0.253933	0.218304	0.224317	0.223436	0.272254	0.204205	0.286228	0.227484	0.182694	0.187663	0.265204	0.23172	0.258329	0.241743	0.187404	0.229199	0.169436	0.265791	0.383224	0.482544	0.257266	0.315084	0.461222	0.415195	0.345724	0.177868	0.385603	0.521057	0.239938	0.441059	0.260099	0.237063	0.299852	0.285493	0.235753	0.223915	0.242601	0.293492	0.211614	0.290356	0.189332	0.31068	0.305396	0.265484	0.194333	0.199568
HC8-D3	0.28811	0.284464	0.336292	0.260809	0.294302	0.287578	0.340325	0.378012	0.336165	0.336289	0.266584	0.193582	0.296076	0.241898	0.226676	0.313416	0.26985	0.232944	0.307177	0.203999	0.221524	0.390912	0.493179	0.272741	0.348264	0.479804	0.400218	0.361078	0.242857	0.362139	0.455778	0.295113	0.441715	0.302207	0.282083	0.294156	0.262703	0.310502	0.262079	0.252242	0.262347	0.244154	0.310544	0.222638	0.309526	0.311524	0.26026	0.283691	0.223286
HC9-D7	0.262763	0.25428	0.277714	0.245297	0.217174	0.192965	0.234162	0.295005	0.317017	0.216218	0.283964	0.209154	0.243085	0.299344	0.245951	0.234816	0.285508	0.224983	0.19899	0.245426	0.307869	0.388746	0.472603	0.288939	0.359676	0.465388	0.402656	0.282012	0.181107	0.395696	0.444825	0.301741	0.399733	0.316205	0.235746	0.328132	0.307114	0.2609	0.227856	0.209617	0.278977	0.239639	0.317557	0.21596	0.322269	0.34511	0.256979	0.259169	0.253461
HC9-H0	0.342903	0.230898	0.249026	0.242131	0.283258	0.25614	0.283892	0.307335	0.32766	0.288021	0.27317	0.243716	0.249463	0.30807	0.269637	0.322872	0.237569	0.222287	0.274087	0.207863	0.318	0.386207	0.482389	0.304191	0.33671	0.517126	0.47049	0.329776	0.219139	0.385427	0.584503	0.356749	0.456569	0.27607	0.313188	0.385264	0.333862	0.277786	0.252986	0.324284	0.329388	0.278891	0.352306	0.234582	0.390642	0.364644	0.249891	0.273156	0.239627
HT15-D7	0.432071	0.406419	0.390793	0.405118	0.423029	0.476274	0.385812	0.401565	0.333676	0.439176	0.383523	0.427673	0.393961	0.420795	0.470805	0.436035	0.480875	0.367887	0.504093	0.376827	0.422727	0.489746	0.5015	0.352014	0.314038	0.489358	0.437951	0.45472	0.398152	0.383068	0.421487	0.33399	0.477774	0.399403	0.394927	0.401492	0.47022	0.368833	0.473231	0.435389	0.390898	0.400648	0.359267	0.400563	0.393828	0.400447	0.41904	0.362172	0.373731
HT2-H0	0.310784	0.2251	0.267286	0.272505	0.254862	0.222003	0.257362	0.355479	0.340088	0.242066	0.317295	0.220692	0.255593	0.298597	0.281094	0.282023	0.291097	0.19676	0.322679	0.172983	0.311467	0.386994	0.510315	0.309606	0.369927	0.507638	0.445238	0.377588	0.18519	0.407602	0.519277	0.367041	0.423729	0.316539	0.300282	0.393098	0.354758	0.280746	0.238783	0.304999	0.303932	0.21114	0.302395	0.183893	0.337801	0.340417	0.275854	0.277798	0.263704
P2	0.380013	0.250116	0.255996	0.264613	0.289954	0.295381	0.328427	0.333422	0.330332	0.357388	0.285467	0.273948	0.286247	0.306892	0.280539	0.35042	0.272229	0.277027	0.322806	0.245921	0.334593	0.425751	0.447898	0.337467	0.347669	0.54586	0.469561	0.326887	0.271097	0.402999	0.592006	0.384339	0.484552	0.225943	0.262351	0.407901	0.265887	0.302735	0.272143	0.317115	0.33035	0.283033	0.347392	0.269407	0.420392	0.401402	0.268745	0.283988	0.195985
P7	0.28459	0.306136	0.349156	0.236285	0.322819	0.289386	0.334666	0.38692	0.344321	0.316694	0.25765	0.214993	0.303635	0.30688	0.229172	0.316937	0.258313	0.257499	0.259685	0.260414	0.21677	0.406996	0.48821	0.294738	0.360829	0.499128	0.430968	0.335294	0.263371	0.377534	0.485434	0.297435	0.4296	0.314351	0.275075	0.313319	0.292836	0.309254	0.252101	0.249265	0.292013	0.252161	0.352966	0.256734	0.315162	0.348891	0.272518	0.281593	0.271021
P9	0.331941	0.250509	0.316245	0.198189	0.239127	0.280036	0.344964	0.276392	0.291053	0.25854	0.150867	0.228606	0.257846	0.275101	0.248118	0.303831	0.240668	0.163341	0.295933	0.226511	0.216555	0.347123	0.438901	0.19192	0.235182	0.437138	0.379496	0.292512	0.217775	0.31602	0.471596	0.229669	0.388344	0.268463	0.202958	0.281467	0.281874	0.225994	0.263127	0.234289	0.230046	0.214376	0.277273	0.24299	0.283687	0.275225	0.217329	0.203132	0.172072
P5	0.343203	0.269896	0.229905	0.280646	0.232508	0.279365	0.227167	0.323061	0.406434	0.295002	0.293	0.326955	0.276798	0.283481	0.303992	0.277651	0.288727	0.271009	0.317122	0.329378	0.34111	0.462535	0.41614	0.298693	0.364103	0.522754	0.462619	0.239644	0.241028	0.379237	0.502059	0.400904	0.447311	0.237038	0.240252	0.40963	0.306007	0.243451	0.286211	0.325	0.407749	0.303384	0.417873	0.289033	0.402643	0.423334	0.198881	0.245154	0.283063
HC15-D5	0.32128	0.239286	0.238752	0.294829	0.205281	0.260793	0.215765	0.327504	0.34974	0.262891	0.329029	0.28825	0.180081	0.240062	0.29569	0.260139	0.304905	0.221341	0.309979	0.280643	0.32068	0.43791	0.444607	0.271057	0.396581	0.475041	0.465862	0.282903	0.230246	0.367719	0.501108	0.363384	0.459248	0.274944	0.253396	0.389236	0.349965	0.251585	0.254582	0.334065	0.374433	0.25368	0.398835	0.252285	0.400807	0.374112	0.23614	0.201596	0.268009
HC7-D3	0.275839	0.246062	0.273353	0.30547	0.256299	0.243339	0.216512	0.312521	0.286475	0.253983	0.300122	0.209358	0.270769	0.305937	0.252779	0.255129	0.275495	0.259764	0.222891	0.204124	0.326368	0.411002	0.522398	0.326124	0.384664	0.484767	0.378193	0.366231	0.175154	0.437124	0.463881	0.313224	0.430454	0.33382	0.264276	0.365288	0.328449	0.323282	0.21579	0.262632	0.347484	0.253464	0.360078	0.216531	0.341423	0.384888	0.27286	0.266749	0.248294
HT3-D3	0.41525	0.525849	0.445988	0.45672	0.449623	0.530531	0.442521	0.38533	0.487648	0.433871	0.424563	0.525863	0.505465	0.465118	0.487291	0.415778	0.514947	0.49342	0.452065	0.511224	0.453653	0.363692	0.531905	0.388804	0.407408	0.411792	0.32962	0.401497	0.458926	0.324499	0.236919	0.439199	0.303863	0.433377	0.429631	0.418953	0.549771	0.441106	0.519753	0.487754	0.463724	0.490093	0.455664	0.4887	0.381174	0.477626	0.45828	0.443132	0.506356
P4	0.338434	0.310634	0.266271	0.239893	0.20943	0.26094	0.249524	0.280215	0.303077	0.318295	0.261593	0.259624	0.266065	0.259535	0.286716	0.25006	0.271939	0.255894	0.269422	0.294703	0.320155	0.384802	0.460686	0.226703	0.319285	0.399322	0.338611	0.26877	0.243958	0.297681	0.421548	0.269765	0.396179	0.26236	0.162316	0.356261	0.350259	0.259658	0.289071	0.224862	0.267728	0.283103	0.301913	0.218597	0.289054	0.295217	0.163477	0.227377	0.255492
HC5-D7	0.268716	0.264882	0.244291	0.242957	0.259942	0.286732	0.314224	0.236802	0.333673	0.260217	0.282536	0.233906	0.321832	0.305376	0.188597	0.31123	0.279432	0.246475	0.287755	0.252191	0.264965	0.423932	0.449747	0.340936	0.315451	0.555987	0.370089	0.280169	0.215268	0.376913	0.492778	0.340385	0.436854	0.272307	0.283864	0.340132	0.281245	0.33065	0.222161	0.290022	0.355518	0.258564	0.429019	0.30053	0.333104	0.4032	0.257279	0.258914	0.237244
HT15-H0	0.274942	0.223551	0.26799	0.247734	0.218817	0.267491	0.319529	0.283207	0.297861	0.26509	0.189751	0.227166	0.253014	0.268254	0.236772	0.25528	0.252966	0.192899	0.228259	0.215081	0.277646	0.375107	0.409781	0.247079	0.273027	0.485843	0.435042	0.259589	0.193057	0.376739	0.533016	0.300866	0.441803	0.249939	0.250921	0.284669	0.229837	0.219222	0.22545	0.275877	0.302012	0.239098	0.333001	0.26779	0.333225	0.377007	0.276983	0.192093	0.210946
HT4-D7	0.27063	0.414914	0.414315	0.366536	0.342175	0.404874	0.412826	0.273911	0.314741	0.390459	0.292403	0.384553	0.443426	0.421434	0.340521	0.380024	0.423045	0.349712	0.39619	0.37155	0.289041	0.441508	0.553479	0.287146	0.224797	0.540041	0.322007	0.416798	0.308611	0.384617	0.386681	0.289568	0.380244	0.421434	0.335646	0.227596	0.396521	0.370067	0.409341	0.348129	0.338355	0.371114	0.341618	0.337255	0.19267	0.433706	0.377745	0.332271	0.340256
HT5-D3	0.417213	0.492931	0.450235	0.429799	0.414551	0.488914	0.379436	0.481965	0.458832	0.464447	0.463628	0.491726	0.438035	0.448535	0.516196	0.383425	0.496931	0.464104	0.456441	0.457691	0.468334	0.451876	0.514989	0.413904	0.471492	0.451053	0.490164	0.423347	0.425649	0.406957	0.454961	0.468496	0.410089	0.447861	0.431601	0.52074	0.512226	0.427469	0.490379	0.477294	0.410289	0.44899	0.392611	0.410146	0.436792	0.485511	0.426633	0.41974	0.468183
HC11-D3	0.289094	0.254238	0.291724	0.252668	0.232456	0.227506	0.250739	0.304687	0.279768	0.233878	0.280962	0.17184	0.250046	0.265455	0.237064	0.254445	0.265383	0.194382	0.190894	0.188644	0.285378	0.397595	0.465279	0.302798	0.349674	0.459239	0.414539	0.302578	0.187096	0.405166	0.461355	0.289101	0.414745	0.318007	0.212486	0.345766	0.313493	0.29787	0.190638	0.246006	0.318195	0.245651	0.328236	0.19476	0.311757	0.321742	0.22428	0.240653	0.240271
HC13-H0	0.293587	0.187766	0.273321	0.224397	0.262219	0.213173	0.247087	0.319922	0.305141	0.298986	0.283278	0.14127	0.244839	0.249275	0.233524	0.265536	0.213826	0.193423	0.228322	0.219068	0.285955	0.396166	0.492346	0.313239	0.372698	0.516118	0.437191	0.338082	0.203899	0.391812	0.525308	0.308152	0.47892	0.300148	0.291508	0.321845	0.308299	0.271121	0.240981	0.263584	0.315962	0.225118	0.388171	0.221548	0.367699	0.361421	0.244907	0.247706	0.210123
HT3-D5	0.341919	0.333515	0.274348	0.301949	0.23775	0.350552	0.258906	0.329419	0.417774	0.2382	0.276156	0.34811	0.312935	0.330076	0.363689	0.237207	0.341542	0.282159	0.270554	0.33716	0.339448	0.334826	0.408233	0.249956	0.368811	0.367762	0.355438	0.218329	0.272809	0.315971	0.371326	0.396581	0.306218	0.254569	0.25458	0.417705	0.39366	0.229401	0.320372	0.326051	0.348827	0.293434	0.366207	0.299571	0.324487	0.407462	0.268461	0.250937	0.312485
HC4-D5	0.314447	0.238723	0.236814	0.241124	0.199416	0.269664	0.236154	0.346968	0.301951	0.314314	0.267887	0.276103	0.178427	0.277147	0.300087	0.266835	0.255012	0.221843	0.316545	0.21021	0.305267	0.404026	0.433462	0.231791	0.326606	0.424052	0.472229	0.28667	0.208732	0.340546	0.509715	0.311406	0.443411	0.215789	0.18737	0.367483	0.298469	0.167118	0.28229	0.283557	0.32676	0.216973	0.322782	0.187214	0.368794	0.376575	0.223965	0.201278	0.213455
HC1-D3	0.302197	0.283411	0.348169	0.306357	0.347672	0.315179	0.320151	0.334782	0.297354	0.371374	0.302514	0.265129	0.32433	0.286738	0.238626	0.341923	0.308399	0.293144	0.30656	0.267794	0.30477	0.429508	0.531223	0.34497	0.412299	0.496539	0.4417	0.376626	0.288328	0.357591	0.478267	0.366907	0.451732	0.311251	0.326245	0.289787	0.335292	0.356377	0.273545	0.2728	0.322553	0.299313	0.367156	0.319644	0.397706	0.34501	0.324316	0.335467	0.291228
HC15-D7	0.292283	0.262534	0.248118	0.286136	0.226818	0.286937	0.338191	0.331053	0.373895	0.284568	0.277086	0.264084	0.310455	0.290245	0.218638	0.284207	0.282466	0.264989	0.254294	0.290865	0.354652	0.446253	0.379573	0.339811	0.361382	0.547269	0.467615	0.290654	0.245469	0.391396	0.565349	0.411508	0.463854	0.272557	0.285087	0.355338	0.249368	0.296009	0.193759	0.2826	0.355693	0.270669	0.434163	0.325817	0.385614	0.430921	0.28577	0.252178	0.225458
HC9-D3	0.271425	0.261384	0.307624	0.227453	0.277777	0.311228	0.363124	0.357702	0.364126	0.291031	0.250785	0.269287	0.28505	0.255442	0.186468	0.352695	0.223249	0.233449	0.283408	0.257558	0.198072	0.407255	0.465695	0.294317	0.339828	0.532569	0.462718	0.304587	0.270661	0.349249	0.534592	0.371414	0.476926	0.241	0.294823	0.301789	0.253695	0.298154	0.242561	0.299067	0.368785	0.22876	0.399344	0.284759	0.390438	0.368637	0.250685	0.265476	0.229843
HT2-D7	0.319775	0.277759	0.302047	0.30168	0.22444	0.237479	0.238922	0.274702	0.318719	0.315551	0.263449	0.246877	0.28193	0.343373	0.307603	0.269386	0.291611	0.272332	0.285384	0.265358	0.324913	0.385816	0.507749	0.270036	0.307498	0.470274	0.385813	0.313842	0.191231	0.379069	0.496721	0.305447	0.38003	0.331762	0.282455	0.371454	0.344217	0.271542	0.294188	0.262205	0.278433	0.260569	0.267265	0.198952	0.311129	0.357186	0.255202	0.250153	0.220791
HC4-D7	0.338772	0.2817	0.26731	0.279171	0.208376	0.232002	0.22094	0.323678	0.348216	0.253294	0.295571	0.247022	0.240134	0.270483	0.290531	0.244239	0.265983	0.263351	0.296468	0.260324	0.290512	0.402987	0.466754	0.23996	0.356959	0.424507	0.384639	0.275452	0.226011	0.362249	0.456152	0.309391	0.417175	0.290469	0.257257	0.390307	0.356705	0.227361	0.293866	0.265637	0.314797	0.264914	0.32333	0.19547	0.30976	0.339539	0.194052	0.219154	0.23718
HC13-D5	0.305313	0.320539	0.360853	0.336946	0.341986	0.331329	0.271956	0.249005	0.237325	0.30658	0.326064	0.290412	0.366262	0.363368	0.328914	0.311874	0.364421	0.31531	0.303178	0.31165	0.322571	0.414101	0.566879	0.342662	0.286046	0.517387	0.307825	0.397144	0.264643	0.438162	0.390691	0.250422	0.449505	0.402542	0.318798	0.279233	0.406892	0.379571	0.317975	0.307709	0.362245	0.334907	0.37737	0.300062	0.25602	0.401946	0.324756	0.328407	0.323066
HC1-H0	0.291955	0.29358	0.310776	0.296818	0.308843	0.269895	0.267497	0.298643	0.224517	0.374494	0.302368	0.270918	0.301069	0.331515	0.317929	0.320655	0.28558	0.279898	0.303307	0.259712	0.283548	0.396464	0.487851	0.321536	0.29561	0.506298	0.401138	0.373926	0.259359	0.427486	0.518992	0.300563	0.478105	0.279249	0.27892	0.335697	0.298092	0.303224	0.31378	0.278592	0.319916	0.2977	0.297778	0.233824	0.307961	0.373788	0.288349	0.275058	0.227629
HC3-D3	0.32091	0.247136	0.304401	0.258146	0.274214	0.317463	0.270337	0.314849	0.329184	0.296353	0.271201	0.219958	0.265506	0.259055	0.303983	0.260856	0.280847	0.238892	0.213047	0.247342	0.327274	0.333634	0.438112	0.30544	0.349559	0.45021	0.3976	0.295228	0.263683	0.34018	0.484501	0.338405	0.433954	0.290426	0.31057	0.340565	0.324571	0.28532	0.247835	0.259007	0.266062	0.247476	0.300395	0.30185	0.341263	0.346871	0.290251	0.250443	0.254147
HT11-H0	0.340661	0.24281	0.344694	0.326659	0.298018	0.312012	0.338359	0.40221	0.369202	0.35349	0.360177	0.25346	0.24418	0.295498	0.248748	0.367457	0.292319	0.292324	0.34731	0.250036	0.308829	0.521436	0.465044	0.384167	0.424878	0.61088	0.563563	0.393196	0.293069	0.464862	0.628393	0.407256	0.547249	0.343789	0.315347	0.392549	0.226966	0.350299	0.252633	0.360077	0.432141	0.28002	0.463057	0.317953	0.48346	0.460049	0.316062	0.294138	0.261213
HC6-H0	0.316137	0.24304	0.280262	0.319685	0.302229	0.2806	0.286626	0.372305	0.295057	0.376933	0.330303	0.27103	0.276826	0.323774	0.306509	0.379443	0.308656	0.267309	0.330894	0.212646	0.370499	0.493068	0.495838	0.383223	0.401423	0.577106	0.530656	0.420095	0.257639	0.451918	0.624272	0.40217	0.541497	0.333969	0.320249	0.391583	0.306599	0.325947	0.284776	0.341581	0.379573	0.27732	0.390789	0.295287	0.464334	0.436921	0.311309	0.283583	0.254727
HC11-D7	0.21594	0.208533	0.242049	0.229091	0.232851	0.242998	0.261778	0.321632	0.268718	0.279737	0.260728	0.21652	0.222797	0.247139	0.224614	0.2817	0.249786	0.183753	0.274991	0.166988	0.288479	0.385371	0.463874	0.27181	0.296785	0.494244	0.474697	0.326932	0.193672	0.373979	0.546526	0.338965	0.464069	0.278227	0.253085	0.288111	0.248056	0.24316	0.231479	0.257581	0.33194	0.238096	0.319268	0.230249	0.365611	0.361617	0.269769	0.192458	0.189898
HT3-H0	0.283185	0.232276	0.281972	0.28076	0.25559	0.204229	0.266998	0.303808	0.258796	0.291219	0.303057	0.220976	0.222308	0.302702	0.286518	0.339643	0.246002	0.200306	0.289322	0.154872	0.318431	0.437561	0.506129	0.333369	0.345659	0.512533	0.504054	0.372614	0.219835	0.444259	0.595492	0.335873	0.483631	0.329286	0.295493	0.345437	0.325395	0.255623	0.251251	0.304034	0.343696	0.228796	0.318545	0.205504	0.398304	0.370227	0.284756	0.236937	0.245868
HC11-H0	0.266423	0.291845	0.274806	0.325963	0.249709	0.259559	0.174161	0.302163	0.252102	0.326287	0.361348	0.271263	0.24418	0.322639	0.323433	0.239521	0.335591	0.300301	0.309196	0.272122	0.311829	0.482785	0.509265	0.314026	0.364579	0.499212	0.465667	0.352218	0.234815	0.431371	0.495644	0.317662	0.502679	0.318694	0.248117	0.364405	0.367798	0.286488	0.299503	0.296068	0.397097	0.327714	0.378274	0.213163	0.354575	0.453559	0.259463	0.24047	0.298313
HC1-D7	0.29339	0.258056	0.20889	0.291621	0.264553	0.223736	0.190179	0.235957	0.267861	0.268421	0.313155	0.214355	0.296583	0.275251	0.254394	0.276545	0.310674	0.257476	0.250975	0.216999	0.335303	0.422006	0.531347	0.34744	0.385934	0.522272	0.397265	0.329019	0.169906	0.415987	0.484579	0.321142	0.426174	0.308378	0.263205	0.363211	0.367092	0.292786	0.238496	0.274582	0.343559	0.275036	0.36948	0.192374	0.361801	0.393538	0.278686	0.26666	0.259289
HT13-H0	0.260116	0.194202	0.287295	0.186201	0.229425	0.23755	0.252176	0.309584	0.278351	0.266036	0.247799	0.176882	0.232368	0.283195	0.251802	0.251085	0.232092	0.19128	0.272755	0.156265	0.265687	0.342413	0.484293	0.243174	0.288704	0.465149	0.442539	0.322234	0.18826	0.364038	0.531564	0.322655	0.408198	0.266815	0.258126	0.305538	0.30309	0.238659	0.259002	0.2649	0.295811	0.198134	0.316462	0.227499	0.32727	0.361557	0.268017	0.183557	0.195084
HC10-D3	0.309986	0.30186	0.352998	0.305929	0.294506	0.318604	0.3648	0.233275	0.230118	0.313354	0.271378	0.254326	0.311436	0.350554	0.328595	0.340728	0.320402	0.275595	0.349359	0.249152	0.253312	0.427859	0.541275	0.279959	0.224799	0.537486	0.38475	0.432646	0.253512	0.411534	0.490734	0.223631	0.470821	0.38635	0.313797	0.251116	0.347729	0.30129	0.335049	0.326129	0.344354	0.297348	0.355671	0.320614	0.233183	0.394614	0.318408	0.265215	0.286685
HC15-H0	0.324952	0.163057	0.302614	0.271982	0.281889	0.251922	0.277689	0.378266	0.332497	0.257256	0.333617	0.208744	0.226422	0.268304	0.303077	0.330953	0.27076	0.204849	0.315158	0.189795	0.290018	0.384072	0.468342	0.335428	0.363549	0.501253	0.506711	0.391876	0.244806	0.37787	0.543944	0.383877	0.450137	0.307852	0.323419	0.369054	0.342602	0.269693	0.233678	0.320119	0.313783	0.18595	0.323697	0.251769	0.414061	0.325224	0.299968	0.254994	0.249762
HC14-D7	0.313335	0.186967	0.243815	0.256376	0.230377	0.296031	0.237722	0.392021	0.352304	0.228525	0.274249	0.252232	0.217675	0.257695	0.284025	0.251047	0.276795	0.173786	0.321002	0.240244	0.284222	0.384291	0.394993	0.257469	0.33477	0.449878	0.472432	0.271702	0.235088	0.331615	0.508438	0.37659	0.43396	0.210946	0.273994	0.386578	0.339677	0.227201	0.266963	0.325735	0.318365	0.219048	0.357197	0.274871	0.350626	0.323862	0.244995	0.166385	0.268199
HC10-H0	0.263289	0.354483	0.401973	0.384154	0.362492	0.425014	0.395818	0.253518	0.278516	0.417176	0.32592	0.363037	0.424143	0.338632	0.323821	0.397344	0.383139	0.356687	0.377909	0.358047	0.28981	0.487388	0.551322	0.344447	0.289741	0.614895	0.391849	0.443397	0.337886	0.39688	0.451001	0.323393	0.507036	0.435362	0.374341	0.185021	0.349377	0.384538	0.379486	0.359872	0.386876	0.379435	0.455948	0.42863	0.320207	0.481326	0.373708	0.313605	0.330023
HT11-D5	0.486026	0.454844	0.408189	0.408699	0.393945	0.4908	0.393922	0.446659	0.471621	0.448195	0.381083	0.458711	0.407575	0.438038	0.512494	0.370509	0.450892	0.409049	0.444318	0.434025	0.475872	0.365011	0.578661	0.302287	0.422496	0.302768	0.40891	0.419092	0.416519	0.358788	0.519057	0.440239	0.369213	0.399859	0.383728	0.509038	0.547687	0.37186	0.508553	0.471269	0.399062	0.446328	0.361485	0.408795	0.461632	0.457184	0.402385	0.352335	0.410386
HC10-D7	0.262173	0.229751	0.331936	0.306946	0.290048	0.27394	0.2721	0.294503	0.230449	0.321157	0.290144	0.201765	0.267222	0.317164	0.242322	0.309849	0.306538	0.241545	0.329138	0.220271	0.245672	0.431208	0.48723	0.302374	0.326377	0.506922	0.405345	0.404361	0.222237	0.407784	0.501078	0.241043	0.493957	0.360891	0.333697	0.300276	0.29704	0.31218	0.281058	0.260701	0.309601	0.21216	0.341231	0.243185	0.305431	0.363475	0.299468	0.249767	0.224488
HT4-H0	0.27878	0.25233	0.328524	0.30444	0.254317	0.259709	0.243158	0.32675	0.265865	0.356432	0.294463	0.250043	0.251446	0.345023	0.321998	0.278485	0.306104	0.264677	0.296823	0.238258	0.335494	0.433569	0.559182	0.306101	0.347473	0.510746	0.490107	0.410042	0.219564	0.445952	0.566404	0.350875	0.491238	0.354854	0.314257	0.350409	0.379504	0.258903	0.328207	0.319493	0.346655	0.285897	0.284444	0.223449	0.367687	0.425316	0.344409	0.231276	0.271882
HT1-H0	0.286614	0.240534	0.243504	0.258509	0.220188	0.300586	0.188945	0.324595	0.309675	0.328339	0.301448	0.212772	0.221432	0.259933	0.308579	0.228873	0.31232	0.252247	0.326615	0.190083	0.306661	0.376342	0.478241	0.240893	0.346962	0.432637	0.490766	0.321491	0.216168	0.324938	0.506888	0.366518	0.435802	0.27193	0.25142	0.35158	0.377141	0.193302	0.295637	0.307726	0.310006	0.237315	0.330019	0.252311	0.36567	0.390194	0.232915	0.181872	0.244928
HT14-H0	0.310494	0.230673	0.302462	0.295416	0.245171	0.218983	0.219511	0.318775	0.248926	0.348775	0.301556	0.204319	0.258288	0.317647	0.303457	0.291155	0.304894	0.242336	0.30084	0.195731	0.31526	0.410325	0.522094	0.296874	0.336151	0.497962	0.456915	0.404357	0.210287	0.403642	0.558971	0.331267	0.463596	0.329777	0.279101	0.346787	0.369951	0.257133	0.312969	0.302659	0.32716	0.278644	0.301573	0.219421	0.374903	0.392324	0.267825	0.222007	0.198962
HT1-D5	0.428012	0.456905	0.334807	0.446267	0.343058	0.390313	0.368585	0.360048	0.447908	0.447919	0.391566	0.457975	0.396113	0.384517	0.404533	0.385789	0.427502	0.446225	0.436054	0.406828	0.475194	0.559299	0.509421	0.38225	0.466852	0.543327	0.510753	0.366504	0.390328	0.417817	0.526097	0.500969	0.442301	0.375866	0.321153	0.474354	0.448787	0.361525	0.406342	0.390602	0.445528	0.446036	0.433914	0.403176	0.478774	0.509069	0.368107	0.368688	0.373332
HC5-H0	0.286192	0.214408	0.220241	0.202976	0.252848	0.255235	0.24355	0.265631	0.267582	0.286795	0.264476	0.213508	0.22243	0.257981	0.25263	0.302311	0.231146	0.191922	0.277401	0.167634	0.284121	0.389064	0.508523	0.289176	0.329822	0.520503	0.449622	0.352526	0.185124	0.381361	0.559874	0.308783	0.442507	0.294169	0.272332	0.333901	0.343688	0.273661	0.240163	0.309439	0.311275	0.241829	0.315316	0.197954	0.37326	0.352935	0.232418	0.214247	0.204915
HT5-H0	0.285335	0.257972	0.331157	0.287679	0.297366	0.275462	0.330106	0.241	0.175177	0.317882	0.276691	0.274864	0.284289	0.328242	0.311785	0.342781	0.306644	0.229039	0.354851	0.232094	0.261264	0.439157	0.51331	0.296218	0.209227	0.497361	0.376688	0.415185	0.210014	0.410255	0.477661	0.195166	0.457204	0.353542	0.296802	0.186581	0.33004	0.285481	0.309301	0.290368	0.337944	0.264997	0.355008	0.269883	0.236437	0.375758	0.314028	0.273358	0.25716
HT9-H0	0.229656	0.17248	0.246726	0.212961	0.210644	0.216204	0.225927	0.287506	0.226584	0.280359	0.233554	0.174286	0.217352	0.244319	0.248186	0.259291	0.249018	0.171245	0.295865	0.147919	0.249364	0.360328	0.507027	0.247799	0.265019	0.478841	0.432079	0.359603	0.110442	0.361457	0.530851	0.263855	0.406265	0.305251	0.25958	0.286137	0.316479	0.241573	0.247875	0.292799	0.297145	0.178565	0.294887	0.166486	0.326372	0.348651	0.26945	0.18449	0.193921
HT11-D3	0.335061	0.360629	0.371644	0.414367	0.309369	0.453285	0.374034	0.326052	0.295125	0.405049	0.317947	0.393235	0.360893	0.380454	0.374319	0.361753	0.47014	0.35298	0.453378	0.382534	0.351986	0.476915	0.519574	0.295226	0.268256	0.504168	0.419583	0.392536	0.348875	0.334562	0.472177	0.297181	0.458821	0.392365	0.346497	0.294077	0.385187	0.33222	0.444852	0.427367	0.421615	0.38348	0.419175	0.427458	0.357109	0.512773	0.386422	0.271576	0.35736
HT10-H0	0.308041	0.187735	0.248	0.343344	0.269718	0.213557	0.217057	0.319495	0.311037	0.309114	0.344211	0.248975	0.251391	0.330839	0.260007	0.344193	0.301024	0.251564	0.321225	0.224418	0.335026	0.48913	0.529137	0.387062	0.391132	0.574699	0.499729	0.374738	0.200741	0.458799	0.591805	0.384787	0.496559	0.331475	0.306139	0.374867	0.331964	0.320571	0.248182	0.312657	0.389933	0.257178	0.39547	0.233999	0.435578	0.434909	0.275081	0.286319	0.24005
HT4-D5	0.556702	0.592255	0.5355	0.541606	0.566583	0.530035	0.542832	0.57528	0.588409	0.564723	0.594501	0.587615	0.581018	0.564204	0.611067	0.57672	0.553315	0.56151	0.502093	0.562431	0.629397	0.5474	0.45308	0.61061	0.611195	0.637795	0.574042	0.521041	0.57319	0.586891	0.620627	0.624622	0.591749	0.549398	0.570902	0.6603	0.537473	0.562009	0.516761	0.547355	0.53059	0.571893	0.497421	0.531307	0.570778	0.501925	0.572088	0.585352	0.576519
HT7-D3	0.356587	0.324715	0.265153	0.308078	0.27825	0.329505	0.235467	0.342591	0.392402	0.346099	0.318394	0.360889	0.301134	0.324947	0.36195	0.31881	0.321067	0.315396	0.375175	0.309142	0.381528	0.414109	0.479815	0.309501	0.404334	0.446271	0.423387	0.285837	0.244469	0.359215	0.474072	0.378446	0.398263	0.287442	0.277816	0.464061	0.407705	0.303651	0.329564	0.380517	0.38343	0.331409	0.353871	0.265257	0.408404	0.404935	0.248077	0.289477	0.306944
HT12-D3	0.380487	0.381846	0.356966	0.3611	0.338213	0.439598	0.335666	0.467433	0.43968	0.37281	0.380994	0.401594	0.350672	0.339042	0.445282	0.308563	0.431923	0.371255	0.410966	0.365055	0.446649	0.365406	0.523753	0.340897	0.446025	0.414331	0.497837	0.392272	0.359287	0.326505	0.464269	0.488938	0.355644	0.368911	0.411854	0.460549	0.484265	0.352604	0.414321	0.4699	0.389461	0.396677	0.377777	0.38564	0.473695	0.463243	0.412033	0.325132	0.392622
HT15-D5	0.383729	0.388857	0.388214	0.341834	0.364593	0.348444	0.310252	0.368406	0.382577	0.327585	0.317568	0.36821	0.397928	0.424077	0.427485	0.310252	0.385328	0.36073	0.285798	0.343005	0.429341	0.314345	0.55214	0.356879	0.381216	0.412219	0.352108	0.357358	0.289476	0.400786	0.444372	0.392633	0.315609	0.40044	0.374559	0.479358	0.463309	0.36579	0.389699	0.354437	0.32042	0.353654	0.268478	0.287921	0.356199	0.391859	0.360466	0.358182	0.371002
HT11-D7	0.307516	0.361361	0.416702	0.384862	0.367805	0.34729	0.352953	0.420344	0.362155	0.422491	0.354648	0.372733	0.387325	0.406382	0.370904	0.382845	0.407426	0.336527	0.402731	0.343919	0.33118	0.471583	0.6011	0.371436	0.414355	0.537733	0.517026	0.456976	0.338625	0.460682	0.556796	0.395936	0.481917	0.405928	0.406154	0.37083	0.415452	0.330205	0.429905	0.373573	0.354743	0.366819	0.311938	0.299915	0.411323	0.445358	0.407635	0.340761	0.323468
HC4-H0	0.281614	0.304437	0.363815	0.35152	0.3069	0.284904	0.265813	0.324428	0.277694	0.366027	0.310134	0.293854	0.325828	0.322828	0.352275	0.321497	0.386182	0.29065	0.315524	0.283328	0.34929	0.423363	0.556402	0.301943	0.319175	0.472057	0.470702	0.407001	0.241519	0.366351	0.52037	0.345157	0.420555	0.411675	0.347817	0.299209	0.367656	0.330145	0.340534	0.305039	0.298835	0.332915	0.236229	0.282923	0.333051	0.365601	0.367986	0.295873	0.282843
HT12-D5	0.478707	0.486366	0.423611	0.468872	0.420564	0.444861	0.365544	0.476826	0.457271	0.459824	0.410232	0.47371	0.434823	0.500992	0.517288	0.422322	0.491189	0.454067	0.459247	0.421168	0.52657	0.434044	0.606649	0.362933	0.463298	0.402623	0.463048	0.430457	0.404035	0.378898	0.520188	0.437462	0.407631	0.450396	0.415329	0.556005	0.580284	0.401281	0.512217	0.415452	0.389406	0.446575	0.317205	0.390397	0.43416	0.423474	0.434998	0.416343	0.460901
HT6-D5	0.34928	0.444779	0.390019	0.436295	0.363402	0.437487	0.364429	0.404384	0.422418	0.416504	0.346405	0.442391	0.389199	0.425416	0.378617	0.343566	0.458239	0.427903	0.392848	0.403976	0.391795	0.457198	0.579555	0.333073	0.42003	0.437368	0.468717	0.402214	0.387939	0.381874	0.442574	0.417444	0.383492	0.404491	0.337466	0.419219	0.483018	0.351967	0.453872	0.39289	0.410525	0.411918	0.400628	0.393489	0.449735	0.49413	0.371677	0.344791	0.4023
P8	0.379975	0.335684	0.342242	0.374163	0.350292	0.387324	0.328185	0.449716	0.432708	0.439384	0.395461	0.402954	0.349179	0.348396	0.361809	0.418904	0.38173	0.370809	0.458174	0.365728	0.348859	0.48884	0.542617	0.387959	0.447129	0.546651	0.551456	0.375135	0.360525	0.39625	0.55449	0.461495	0.513711	0.300684	0.337116	0.433888	0.420206	0.339458	0.401665	0.460642	0.477856	0.384872	0.445143	0.356038	0.522504	0.489391	0.31779	0.324828	0.345187
HT10-D5	0.378477	0.371341	0.304744	0.351623	0.298144	0.363492	0.281272	0.344944	0.400325	0.359711	0.354396	0.394794	0.356311	0.36994	0.420704	0.305937	0.378902	0.346391	0.338766	0.316814	0.428931	0.37975	0.499581	0.325339	0.404725	0.439763	0.425522	0.306103	0.322454	0.371862	0.452788	0.452615	0.392108	0.329634	0.30262	0.465615	0.467774	0.27946	0.3954	0.385016	0.378182	0.369133	0.336954	0.306037	0.415275	0.441773	0.286192	0.275088	0.327484
HT1-D7	0.392165	0.400928	0.424188	0.383985	0.397163	0.426912	0.415744	0.274106	0.286605	0.459123	0.301418	0.413346	0.426213	0.46028	0.459402	0.426465	0.420055	0.372161	0.450604	0.374965	0.371729	0.411218	0.587952	0.315799	0.283367	0.505476	0.327493	0.44635	0.355565	0.405609	0.510008	0.266905	0.41524	0.411222	0.371179	0.331345	0.447606	0.374414	0.438694	0.395673	0.362942	0.386783	0.331318	0.347016	0.286183	0.439231	0.40863	0.367857	0.347389
HC4-D3	0.378556	0.35482	0.32175	0.427741	0.340589	0.397416	0.335764	0.297734	0.240497	0.45338	0.39105	0.363791	0.330794	0.381481	0.383336	0.384696	0.411954	0.375309	0.468048	0.295715	0.408122	0.549463	0.530202	0.36303	0.344417	0.524727	0.469393	0.463224	0.345559	0.443124	0.512271	0.326591	0.537829	0.398609	0.340513	0.34248	0.414107	0.347338	0.414442	0.382142	0.416057	0.392875	0.406146	0.371887	0.383409	0.489633	0.372864	0.31481	0.323509
HT14-D5	0.46769	0.490624	0.484468	0.483632	0.494778	0.461978	0.411581	0.387755	0.36801	0.462053	0.489726	0.492047	0.522079	0.529431	0.516511	0.47067	0.520884	0.47679	0.464501	0.481438	0.494617	0.480946	0.652957	0.496763	0.439848	0.502662	0.321326	0.511142	0.405575	0.536862	0.462253	0.352923	0.422071	0.512032	0.455811	0.48591	0.536919	0.521961	0.498808	0.47567	0.50424	0.493648	0.455408	0.41008	0.393827	0.508084	0.485317	0.500478	0.474769
HT13-D5	0.388013	0.470021	0.451003	0.443173	0.497059	0.480198	0.44727	0.394703	0.40651	0.446384	0.446015	0.497467	0.522708	0.503563	0.441301	0.46578	0.486889	0.449769	0.47174	0.463008	0.418077	0.469623	0.646142	0.450174	0.396964	0.589181	0.40145	0.489231	0.404659	0.493661	0.454908	0.413756	0.430987	0.474317	0.459807	0.410613	0.513974	0.50657	0.488485	0.473708	0.446986	0.468312	0.425373	0.396407	0.363009	0.475079	0.462242	0.488515	0.47124
HT1-D3	0.409916	0.285207	0.334742	0.30417	0.347592	0.385687	0.270987	0.469663	0.402282	0.326229	0.345169	0.342721	0.275775	0.350199	0.414879	0.318931	0.3406	0.31181	0.389974	0.308557	0.392626	0.325238	0.484052	0.300473	0.395535	0.418128	0.488789	0.361715	0.321055	0.337821	0.490318	0.438686	0.411253	0.309642	0.339249	0.494813	0.447461	0.304415	0.395638	0.409732	0.331643	0.282439	0.322768	0.31295	0.434379	0.372189	0.31884	0.285183	0.330379
HT6-D7	0.394784	0.364112	0.419143	0.364079	0.373125	0.390849	0.367039	0.403615	0.337719	0.419432	0.292942	0.348456	0.367889	0.449247	0.434776	0.380976	0.387157	0.34006	0.391246	0.328106	0.405677	0.385444	0.605668	0.280753	0.329658	0.478071	0.465255	0.448824	0.323196	0.392427	0.5521	0.357169	0.418239	0.419441	0.374986	0.430837	0.466776	0.365663	0.440686	0.363072	0.301433	0.355436	0.253199	0.291642	0.368954	0.38017	0.407622	0.342272	0.326394
HT13-D7	0.417372	0.460109	0.411062	0.431376	0.403712	0.479829	0.368037	0.325142	0.400761	0.388809	0.388051	0.475146	0.442972	0.456726	0.493611	0.355189	0.514634	0.446371	0.426765	0.455844	0.454379	0.457994	0.524287	0.375694	0.384449	0.484935	0.383952	0.397754	0.421294	0.404294	0.343442	0.425921	0.41485	0.416005	0.383538	0.43044	0.519355	0.386565	0.453823	0.428053	0.368296	0.43701	0.382209	0.442081	0.358999	0.487575	0.419431	0.385907	0.423563
HT8-H0	0.301422	0.22488	0.279399	0.254033	0.275487	0.239692	0.266915	0.327837	0.271647	0.307171	0.287587	0.235189	0.191527	0.318043	0.249687	0.289487	0.2754	0.230006	0.314152	0.182376	0.289374	0.420412	0.527594	0.319958	0.362093	0.504923	0.503882	0.383457	0.199624	0.424998	0.580265	0.309312	0.47351	0.282005	0.294681	0.3408	0.332731	0.250542	0.262906	0.319026	0.326445	0.223818	0.323025	0.226596	0.40776	0.38744	0.299746	0.239749	0.225492
HT10-D3	0.443493	0.412868	0.294204	0.431149	0.377952	0.437862	0.342113	0.397234	0.467009	0.38504	0.384553	0.45432	0.422109	0.408789	0.425405	0.387052	0.470929	0.411792	0.400941	0.38696	0.511994	0.411514	0.489651	0.376881	0.452464	0.422785	0.469232	0.341616	0.380723	0.329302	0.488408	0.483048	0.367138	0.390775	0.382515	0.509293	0.520129	0.380746	0.430661	0.420134	0.377212	0.436115	0.400742	0.435032	0.459953	0.452905	0.395645	0.373228	0.421061
HT13-D3	0.608475	0.619799	0.533436	0.578139	0.542809	0.603481	0.535446	0.488021	0.567488	0.533561	0.567015	0.646953	0.569603	0.573722	0.625525	0.526777	0.592426	0.611598	0.524726	0.596659	0.635312	0.596931	0.476743	0.556631	0.567255	0.583044	0.531283	0.48225	0.589506	0.537113	0.49763	0.609932	0.540323	0.523582	0.512343	0.631975	0.586155	0.552991	0.555421	0.572507	0.576151	0.600435	0.583771	0.60813	0.552398	0.626485	0.540794	0.563483	0.584872
HT5-D5	0.682207	0.718272	0.69833	0.727988	0.728038	0.740364	0.747968	0.691338	0.716963	0.669617	0.696706	0.777237	0.747225	0.735631	0.687287	0.722387	0.735034	0.73451	0.689319	0.745586	0.713817	0.690457	0.649666	0.730662	0.673059	0.70163	0.669037	0.674496	0.728131	0.699628	0.651369	0.743538	0.629927	0.694122	0.705647	0.706852	0.685555	0.751102	0.692249	0.733567	0.718982	0.729569	0.72486	0.743874	0.70573	0.75206	0.732488	0.73641	0.716197
HT9-D7	0.487299	0.469327	0.368915	0.450584	0.385284	0.43407	0.393467	0.401481	0.477985	0.43062	0.435903	0.503825	0.436258	0.439207	0.465039	0.381858	0.453773	0.467062	0.40783	0.455433	0.533443	0.506675	0.462376	0.432569	0.506987	0.486586	0.451657	0.351185	0.433186	0.434695	0.531114	0.506383	0.434092	0.372733	0.339274	0.538522	0.483755	0.385955	0.428605	0.411316	0.470317	0.480998	0.471566	0.450463	0.515078	0.503334	0.384596	0.401837	0.420936
HT14-D3	0.512686	0.491299	0.459498	0.488808	0.434089	0.478933	0.46826	0.537309	0.490168	0.522362	0.458823	0.468925	0.452097	0.412328	0.503224	0.423553	0.491474	0.50226	0.483124	0.497256	0.518133	0.584192	0.4043	0.387449	0.52259	0.534542	0.597977	0.436452	0.49686	0.438851	0.601882	0.506799	0.539067	0.443576	0.430063	0.531695	0.431145	0.4288	0.459897	0.451693	0.45718	0.479983	0.481036	0.471293	0.536112	0.529856	0.454217	0.43838	0.45729
[truncated: 76 more columns]

## Sheet: Uniweighted_unifrac_PC
Eigvals	125
1.77893	1.00607	0.870105	0.772899	0.583395	0.502386	0.425059	0.39106	0.333002	0.288996	0.237707	0.221174	0.210027	0.172471	0.163407	0.150943	0.133689	0.131414	0.113846	0.111185	0.101705	0.0918178	0.0904555	0.0861656	0.0773636	0.0755746	0.0712619	0.0639006	0.0623415	0.0603193	0.0589764	0.0552814	0.0544392	0.0523152	0.0455246	0.0431594	0.0391838	0.0362666	0.0342409	0.0331924	0.0307295	0.0296074	0.0262598	0.0254836	0.0218845	0.0202294	0.0176814	0.0156012	0.0140989	0.0133619
Proportion explained	125
0.176168	0.0996318	0.0861669	0.0765404	0.0577738	0.0497515	0.0420938	0.0387268	0.0329773	0.0286194	0.0235402	0.021903	0.020799	0.0170799	0.0161822	0.0149479	0.0132393	0.013014	0.0112742	0.0110107	0.0100718	0.00909275	0.00895784	0.00853301	0.00766135	0.00748418	0.0070571	0.0063281	0.0061737	0.00597344	0.00584045	0.00547454	0.00539113	0.00518079	0.00450832	0.00427409	0.00388038	0.00359149	0.00339089	0.00328705	0.00304316	0.00293203	0.00260052	0.00252365	0.00216722	0.00200332	0.00175099	0.00154499	0.00139622	0.00132324
Species	0	0
Site	125	125
HC1-D5	0.0480798	-0.0779138	0.0191886	-0.0775377	0.0252671	-0.00610874	0.0937857	-0.00191632	0.119669	-0.0267929	0.0716944	-0.0310585	0.0036435	-0.028027	0.0719675	-0.00959712	0.0163662	-0.0142422	0.00102426	-0.00778158	0.0271677	-0.0420083	0.0193955	-0.0342756	0.00532429	-0.00332599	0.0359902	-0.00604653	0.0401286	-0.0353813	0.0161736	0.0185463	-0.0148285	-0.00413949	0.0020723	-0.00373855	-0.00179123	0.000625593	0.0217333	-0.00496701	-0.00256254	-0.00498322	0.00815455	0.00880057	-0.00799527	-0.0226197	0.00905006	0.0179319	-0.0108693
HC10-D5	0.130811	0.0196133	-0.00285522	-0.00495268	0.00720158	0.0289003	0.00771394	-0.0995175	-8.10784e-05	0.0120793	-0.0156875	0.0266559	-0.0189319	-0.0112528	0.00542146	0.0332997	-0.0430239	0.0330352	0.0225778	-0.0436991	0.0260483	0.0104958	-0.0378686	-0.0343976	0.019417	0.0254392	-0.0252942	-0.00879691	-0.00401329	-0.0108849	-0.0137579	-0.0243426	-0.0276439	-0.00580032	0.0101011	-0.0120619	-0.022486	0.00271359	0.0320915	0.0175331	-0.0225616	-0.00115941	0.0194491	-0.0232459	-0.000704283	-0.0125195	-0.0117328	0.00888343	0.0213946
HC11-D5	0.0313488	0.0955996	-0.0156927	-0.0349087	0.0684145	-0.0627096	-0.00953527	-0.0480334	-0.0233791	0.0235655	0.0146855	-0.0226053	-0.069088	-0.0233407	0.0686157	-0.0110674	-0.0201464	-0.0531973	-0.069166	0.00393522	-0.00248312	-0.0135921	0.0136571	-0.0285152	0.0609143	0.00241331	-0.0140737	0.00127775	-0.062984	-0.00378585	0.0189481	0.0125775	-0.00197876	-0.0147737	0.0237668	0.0220931	-0.0179635	0.00250397	0.00701091	0.00320408	-0.0100589	0.00812213	-0.00672657	0.00737457	0.00362022	0.010933	0.00162775	0.00736688	-0.00452005
HC12-D3	0.0621052	-0.000521433	-0.0909288	0.0488609	-0.0215013	0.0323975	0.0166458	-0.0471705	-0.0629312	-0.0149653	0.0174004	-0.0474239	0.016246	0.0339142	-0.0254086	0.0108337	0.0253411	-0.0176117	-0.0105062	0.0219799	0.0434067	0.00600359	0.056091	-0.0102688	-0.0390532	-0.0240846	-0.0168053	-0.0301553	0.0375831	-0.0361072	0.00931622	-0.0594043	0.00326839	-0.00482175	-0.0065122	0.0211328	0.0173702	0.00158955	-0.00791718	0.0180391	0.00898678	0.0230579	-0.0213257	0.0121357	0.00719804	-0.0139777	-0.00422322	0.0178501	-0.00505404
HC12-D5	0.049301	0.0445083	-0.0387442	0.0116001	0.092968	-0.0380931	-0.00967192	0.0244693	0.0338776	0.031904	0.0598087	0.0196377	0.0216107	-0.0313283	0.0237453	0.0286602	0.0110653	-0.0285027	-0.0163026	0.0407112	-0.000377361	-0.00560708	-0.0195134	0.00708802	-0.00390568	0.0116344	-0.0334955	-0.0240968	0.0111864	0.0217766	0.0327383	0.00666749	-0.0268277	0.0229971	0.000524771	0.0208884	0.0338654	0.00167067	0.0199759	0.00704089	0.0052765	-0.0131288	0.00460821	-0.00940198	-0.0350473	-0.0247097	-0.0128671	0.00202558	0.0145878
HC12-H0	0.117765	0.0344134	0.0158435	-0.0109311	-0.0711575	-0.0906769	0.00355687	0.0169239	-0.00306068	-0.00192072	0.0306139	0.0545239	-0.0195226	-0.019314	-0.00539433	0.00762995	0.0408417	-0.0798895	-0.0134701	0.00407724	0.0568636	0.0429792	-0.0354765	0.00100058	-0.00602173	0.0373853	-0.0248616	-0.0361936	-0.0327143	0.0062427	-0.00950917	0.00455178	0.00450537	-0.0168962	-0.00156516	-0.00878117	0.0295636	-0.00502695	0.0137424	-0.00522341	-0.022929	-0.0174382	-0.0138839	0.0166006	-0.00805738	0.0053891	-0.0070976	-0.00360556	-0.0272853
HC13-D7	0.0209106	0.0644127	0.0750207	0.0387348	0.0245591	-0.125378	-0.0112992	-0.0250626	0.0582814	-0.0456155	-0.0129421	-0.0165287	0.00856837	-0.0371648	0.027505	-0.0258253	-0.0738993	-0.0172808	0.00955771	-0.019074	0.0160899	0.0242346	-0.0408413	-0.0313378	0.0353494	-0.00629185	0.0180022	0.0272992	0.0189135	-0.0237722	-0.0166046	-0.0144667	-0.0307614	0.0083803	-0.0052183	-0.0076722	-0.00846661	-0.00791274	0.0148713	-0.017031	0.0127445	0.0106075	-0.0157395	0.00392341	0.0126842	0.00649679	-0.00714948	0.00539793	-0.00538072
HC14-D3	-0.0154771	-0.118028	0.0359235	-0.111292	0.0369124	-0.112788	-0.052518	0.0362137	-0.0293978	0.0957325	0.0248161	-0.0492862	-0.023007	-0.0310749	0.0160803	-0.0407283	0.0233753	0.0034	0.0181171	0.0480455	0.0107062	0.045154	0.0227444	0.0353549	0.0371665	0.0117335	0.0036876	0.00654082	0.0142919	-0.0118402	-0.00696449	0.0203518	-0.0141632	0.0102814	0.00733266	-0.0164903	-0.00210234	0.0157394	0.00232507	-0.00177713	0.010924	-0.00865873	-0.00508716	-0.0189729	-0.00299067	-0.00473678	-0.00116828	0.00751918	0.00792193
HC14-H0	0.0428	-0.133443	0.119405	-0.0631325	-0.0277752	0.0104037	-0.101633	0.0168601	0.0188691	0.00596908	-0.0520753	0.00591326	0.0164136	0.0120969	0.0328483	-0.0439043	0.0135743	0.00752881	-0.00722265	-0.0333429	-0.0251859	0.0321383	-0.00408309	-0.0156147	0.0268892	0.00443875	0.0354456	-0.0419699	-0.0218232	0.0377774	0.0341174	-0.0287565	0.0400645	0.00432103	0.0103106	-0.00888336	-0.0172895	0.0374034	0.00261892	0.00881109	0.0142758	-0.0124527	-0.00955004	-0.000308968	-0.00370635	-0.000922337	0.00205553	0.0118915	-0.00372204
HC2-D7	0.0198573	0.00830372	-0.115653	-0.00218568	-0.020391	-0.0768653	0.0385052	-0.100013	0.0289732	0.0378439	0.0461316	0.046117	-0.00477772	0.000521018	-0.0473246	0.0454919	0.0390687	-0.0105935	0.0401578	-0.0458281	-0.0144081	-0.00983317	0.04113	0.0195287	-0.0254436	5.73863e-05	-0.00662	-0.00194132	-0.0577664	-0.0161635	0.0328486	0.0112498	0.0370342	0.00169743	-0.00105825	0.0281691	-0.00329313	0.0103051	0.0152872	-0.00477859	-0.0272487	0.013976	-0.0181085	-0.0175657	-0.000627888	0.00494432	0.00594334	0.0103738	0.0132998
HC3-D5	0.011939	-0.0674047	-0.0736901	0.0361461	0.026274	0.0658294	0.0129661	0.036137	-0.0433079	0.091579	0.0273277	0.00390146	-0.0127724	0.0190108	-0.0223074	-0.0226492	-0.0110967	0.0555347	0.021509	-0.0353229	-0.0140323	-0.0168857	0.0260287	-0.0306326	0.0236658	-0.0253359	-0.0145604	0.00515769	0.00685299	-0.000895072	-0.0258728	0.0099564	0.0125516	0.0238429	0.0263202	0.00226661	-0.0109953	-0.0176788	0.0221921	-0.0048901	0.0220993	-0.0176149	0.00295247	0.0192266	-0.00175029	-0.010367	-0.0257635	0.0239538	-0.000619828
HC5-D3	0.153725	-0.0312973	-0.0307414	0.0391717	-0.0224857	-0.015874	-0.0125379	-0.0114534	0.0283486	-0.00106475	-0.0341935	0.0050019	0.00208954	0.0297653	-0.0187937	0.0180414	-0.0471264	-0.010474	-0.0354805	0.0214071	0.00425906	-0.0244789	0.00210108	-0.00457523	-0.00659708	0.0212601	-0.0282183	0.00568381	-0.0306657	0.0238173	0.00778755	-0.0118684	0.00484112	-0.0135181	0.017593	-0.0431801	0.0402078	-0.0265404	-0.00379067	-0.00165524	0.0163119	0.0245191	0.0171169	-0.0149948	-0.00561709	-0.0228587	0.000786304	-0.0111898	-0.00580296
HC5-D5	0.0991536	0.0816965	0.00451359	0.0408424	0.0593337	0.0156412	-0.043054	-0.0483161	0.0220801	-0.0399727	-0.00789726	0.0589559	0.0400668	-0.00954022	-0.00119992	-0.0364534	0.029496	0.00212334	0.0443639	0.0346054	-0.0188124	0.00389012	-0.0111218	-0.0026546	0.0644371	-0.0122952	-0.0508801	0.0104239	0.0408951	0.00228554	0.0198679	0.0061762	-0.02148	-0.0110633	0.00108798	0.0160886	0.0380668	-0.00670112	0.00788453	-0.0111075	-0.0197535	-0.00770164	0.0220234	0.00268918	0.0153313	0.00927963	0.0114216	-0.00559813	-0.00357232
HC6-D3	0.0676817	0.0566946	-0.0912103	-0.00789116	0.081317	0.0183544	0.00856729	0.00165693	0.0365538	-0.0550286	-0.0654624	-0.0606853	-0.0295847	-0.0167581	0.00768732	0.0606866	-0.000923268	-0.0553986	-0.0261951	0.0581367	0.00367197	0.015258	0.0208835	0.039525	0.000727466	-0.0435732	0.00123835	-0.0324498	-0.0489026	0.0151896	0.0179791	0.0410836	0.00778195	0.00289144	0.0275659	0.0129809	-0.0110207	0.00318177	-0.0206197	0.00157754	0.0097813	0.0260254	-0.0135009	0.00457345	0.00819464	0.00975673	-0.015151	0.000721842	4.74319e-05
HC6-D5	0.128295	-0.0181094	-0.0457574	-0.095036	0.043646	-0.0131898	0.109998	-0.00359702	0.0180026	0.00180255	-0.00675459	0.0458195	-0.0743693	0.0201886	0.0349153	-0.0240792	-0.0189525	0.02042	-0.0140349	-0.0188465	-0.0250134	-0.0332044	0.0129777	-0.0154768	-0.00416164	0.0463039	-0.0295943	0.0185399	0.0215144	-0.0104403	0.0260791	-0.00380567	-0.00338249	-0.0362328	-0.00667239	0.000640547	0.0267687	0.000221436	0.00968561	-0.00524338	-0.0132462	0.00707755	0.00415235	0.00764926	-0.01155	0.0127934	-0.0282513	-0.00310995	0.0201545
HC7-D5	-0.00834207	0.0311988	-0.0573372	0.0546574	0.0507082	-0.0802834	0.00668932	0.021178	0.0814719	0.0157262	-0.0132689	-0.00355023	0.0791331	0.0018182	-0.0386786	0.0112234	-0.018834	-0.0318979	-0.0584132	-0.0147726	0.0301723	-0.0393646	-0.000473815	0.0636744	0.0101683	-0.0365261	-0.0213798	0.0023447	0.020369	-0.00247396	0.0314081	-0.0129051	0.00423847	-0.0348877	0.0242552	-0.00294133	-0.0134067	-0.0268375	-0.0238166	-0.00742986	-0.00321358	-0.00324854	-0.000587933	0.00712169	-0.00451493	-0.00807415	0.0087523	0.000327322	0.0336055
HC7-D7	0.119193	0.0378131	-0.0647985	0.00245716	-0.0309902	0.00542828	0.0189634	-0.0181801	-0.101441	-0.00805385	-0.0151144	-0.00377558	0.0284218	0.0427819	-0.0505049	-0.00920892	0.0258219	-0.0243084	0.0107475	0.0881312	0.0412632	-0.0211767	-0.0459389	-0.0368401	0.031804	0.00178772	-0.034923	-0.00938079	-0.0030522	-0.0408144	-0.00547446	-0.0049637	0.00059156	0.00575589	0.0321875	-0.00236375	-0.0170983	0.0102484	0.017965	0.0129992	-0.00605104	0.0194962	0.0167061	0.0152598	0.0243906	0.0198695	0.00712602	-0.00582706	-0.00731139
HC7-H0	0.103486	-0.0179652	-0.0405198	0.0384562	-0.0113698	0.0283235	-0.00628051	-0.065408	-0.0171921	0.000973787	0.027472	0.0158841	-0.0174116	-0.0338011	0.012049	0.0265172	0.0281145	-0.0218987	0.0390216	-0.028677	-0.016866	-0.0113088	0.0220125	-0.0109522	0.000531211	0.00337438	0.00542476	-0.0256888	-0.00343445	0.0143823	-0.00164155	-0.0382693	-0.0249008	0.025286	-0.0192188	0.0289208	0.0174882	0.0104825	-0.0074326	-0.000381502	-0.0216535	-0.0270124	0.0335454	-0.0122064	0.0162527	-0.0138097	0.00607614	-0.022198	-0.0112037
HC8-D7	0.0339821	0.0169194	-0.0865656	-0.0164715	-0.0809465	-0.107294	0.0366893	0.0331233	0.0410059	0.0654783	-0.0193377	-0.0336864	0.0778561	-0.00630643	-0.0223748	-0.0647724	0.026023	-0.0380941	0.0433415	0.00686248	-0.0399983	-0.00730167	0.000964564	0.00287778	0.00360104	-0.0209679	0.0188525	-0.00923662	-0.0373394	-0.00244282	0.0157444	-0.0179984	-0.0057921	0.00837253	-0.0140662	0.00925518	0.0275424	-0.0193906	-0.0157111	0.0028859	-0.00248162	-0.0261882	0.0120817	0.00444991	0.0128755	-0.0168067	-0.00188477	0.00838624	-0.00968063
HC8-H0	0.115071	0.00200973	0.0243686	0.0299119	-0.0216874	0.0204139	-0.0178075	-0.0495925	-0.00108548	0.0152906	-0.00817855	-0.00343573	-0.0504239	0.00653464	0.00347805	-0.015165	0.0504259	0.026341	-0.0367235	0.0342541	-0.048236	-0.0362362	-0.00544034	-0.0331395	-0.0193432	0.0260322	0.0240296	0.0210995	-0.0171172	0.00920388	-0.00668918	0.0216835	0.0313927	0.0235554	0.00226638	-0.00435355	0.0222722	0.00070991	-0.0141754	0.0153949	0.0125618	0.00757996	-0.00390736	0.0146346	0.00713944	0.00165903	0.00244094	0.0272563	0.0248391
HC9-D5	0.0936448	-0.113541	-0.0427604	-0.0396641	0.0539556	0.0599939	0.0853116	-0.013225	-0.00753989	-0.0789689	0.0344193	0.0300504	0.0397127	0.0320162	-0.0293718	0.016683	-0.0157396	0.051792	0.0268819	0.0206741	0.0406498	-0.0041474	0.0350152	0.0425624	-0.0206527	0.0319642	0.0107653	0.0409972	0.0154662	0.0150151	0.00149848	0.0272446	-0.00474623	0.0194533	0.00687912	0.000377096	-0.0278453	-0.00659028	0.0013269	-0.00768804	-0.014562	0.00520194	0.00803067	0.00730473	0.00777987	-0.0149931	-0.00126055	0.00650991	-0.0113865
HT2-D3	-0.109193	-0.0470084	-0.163266	0.159352	-0.103875	0.0442505	0.0558381	-0.0974127	-0.0169621	0.0502037	-0.0319954	-0.0786729	0.0446564	-0.0219703	0.0270713	0.0226369	0.00493005	0.0251859	0.0292637	0.04159	0.0018221	-0.018252	-0.0194219	-0.0107933	-0.00890439	-0.0104075	0.00560405	0.0365167	-0.0254625	0.0202651	0.0202188	0.0118493	-0.0106626	-0.050719	-0.016337	-0.0300039	-0.0139718	0.00499498	-0.0202469	-0.0114114	-0.0107363	-0.00921115	-0.00463733	0.000163813	-0.016359	0.00449247	-0.00912778	-0.013895	-0.000824609
HT2-D5	-0.080864	0.166792	-0.284891	-0.11137	0.0314474	0.130754	-0.148114	0.0199056	0.022191	-0.0680263	0.0577288	-0.021316	0.0345119	-0.0174269	0.049825	0.0399197	0.0501037	-0.00662283	-0.00853259	-0.0197521	-0.0193873	0.00146735	0.00284326	-0.0168984	-0.0152365	0.0531293	0.00201573	-0.0160149	0.0100355	-0.00754738	-0.0236687	-0.00239353	-0.00936061	-0.0143645	0.00875869	-0.0305298	-0.0165813	-0.00692363	0.000688211	-0.00625951	-0.00438395	-0.00759479	-0.0120277	0.00269278	-0.00248925	0.011386	0.0100021	0.00646588	0.0025317
HT3-D7	-0.0235381	-0.0430008	-0.0656895	0.0974555	0.0970954	0.0626344	-0.0218224	0.0505722	0.0018144	0.0230253	0.0322917	0.0178436	0.021299	-0.00157646	-0.0392534	-0.000733481	-0.0290833	-0.0392866	0.0128695	0.0222571	-0.0120287	-0.0142135	0.00252076	-5.8594e-06	0.0259349	-0.0309493	-0.0217292	0.035578	0.00395237	0.0198151	-0.00696706	0.0437774	-0.00834677	-0.0118666	-0.0253171	-0.00911999	-0.00413816	0.0256122	-0.010508	-0.0218133	0.00963001	-0.0112842	-0.00873156	-0.0116591	-0.0030465	0.0139815	0.0164308	-0.004958	-0.00240129
HT5-D7	-0.0220835	-0.171672	-0.0248571	-0.0327387	0.0380336	0.0879566	-0.0644493	-0.0167643	-0.0304486	0.0611738	0.0960192	0.00563341	0.0190298	-0.0187053	0.0285271	-0.00122108	-0.00106159	-0.0126233	0.0296918	-0.00547422	-0.0483428	0.0452736	-0.0170106	-0.0514808	0.00399897	0.0128209	-0.0351935	-0.00593625	-0.0308897	-0.0345415	0.0264464	0.0079894	0.00847761	-0.00680018	0.0207283	-0.00946449	0.0162835	0.00249576	-0.00666592	0.00514467	0.0264606	-0.00355335	0.0108492	0.0051042	-0.000223538	0.00229356	0.0129548	0.0131626	-0.00120595
HT6-D3	-0.218789	0.0137224	-0.148636	0.230141	-0.0222627	0.043501	-0.035907	0.00402334	0.0409393	0.00874269	-0.135205	0.115121	0.0566625	-0.0488013	0.0546016	-0.034033	0.0649121	0.0149883	-0.0289805	-0.0102364	0.0144785	-0.0228057	-0.0377017	0.0339523	-0.0253513	0.0215593	0.0106645	-0.00614181	0.016726	-0.0162128	-0.0162226	0.020106	-0.0047541	0.0360658	-0.0162231	0.01105	0.0015751	0.000195007	-0.00796722	0.00492859	0.0164231	-0.000100742	-0.00659217	0.00382277	-0.00081021	-0.0187496	-0.0108913	0.00208064	0.00375424
HT7-D5	-0.179151	-0.205072	-0.112415	-0.00545524	-0.0744698	-0.103932	-0.0414874	0.0424092	-0.0838029	0.0523713	-0.0665456	-0.0110641	0.0168186	0.00659886	0.0347497	0.0455147	-0.0452632	0.035094	-0.0259459	0.0197447	0.0193097	-0.0324016	-0.0280874	0.0098126	0.00379754	-0.00160845	0.0352661	-0.0281593	-0.0287478	0.0140764	-0.0123572	0.00220631	0.019774	-0.0134287	0.00441489	0.0205465	0.0234835	-0.00108275	0.0276641	-0.00128783	0.00189928	-0.00691262	0.0172831	-0.000517463	-0.00295816	0.00389568	0.0146612	0.00853353	-0.00305997
HT7-D7	-0.0543844	0.095261	-0.161943	-0.00820536	0.062343	-0.050141	0.017251	0.0362095	-0.0421818	0.0180279	0.0536223	-0.034466	0.0153193	0.0113313	0.0320622	-0.0141544	-0.0335645	0.00558273	0.0367635	-0.0440156	-0.0199688	0.0232919	-0.00306449	0.0243353	-0.0111324	-0.0640887	0.00859744	0.024304	-0.0253595	-0.024535	-0.0262305	-0.00694554	0.0081395	0.00219536	-0.0176779	-0.0445293	0.025465	0.0379897	0.0134765	-0.00698981	-0.00264237	-0.00333433	-0.00642236	-0.00332081	-0.00514978	0.00111455	-0.0167122	0.00474327	0.00956092
HT7-H0	0.0810325	-0.0296261	0.0201618	0.0165211	-0.00524172	-0.0690837	0.0272965	-0.0298023	0.00647393	0.0297364	0.0395512	0.0204541	-0.0208992	0.00733166	0.0237868	0.0397069	0.000844519	-0.0259124	-0.0103592	-0.00804676	0.016907	0.0124058	-0.00652671	-0.0246035	0.00466714	-0.0183822	-0.012397	0.0015857	0.0206341	-0.0113931	-0.022107	-0.00152637	-0.0286225	0.010359	0.000350908	-0.00370913	0.00413245	-0.0262771	-0.0339021	-0.000291308	-0.0038709	0.0023258	-0.0422465	0.00202367	-0.00790004	0.0144455	0.0215027	-0.00886796	0.0126098
HT8-D3	-0.112851	0.00149557	-0.148434	0.0950643	0.0956393	0.105412	0.00999849	0.0123777	0.00691847	0.0124827	-0.0318463	-0.0625002	-0.0952557	0.0128456	0.02608	0.00344682	-0.0627477	0.00339014	0.0285344	0.0471608	0.0345168	0.0100418	-0.00554844	-0.0222281	-0.0399182	-0.0110921	0.0122073	-0.0155116	-0.0123141	-0.00357303	0.0319285	-0.00418591	0.0128823	0.00964339	-0.0360954	0.0309241	0.0100594	-0.0206267	0.0203283	0.0202006	-0.0044164	0.00420984	-0.00256131	-0.00428403	0.00494294	-0.0101008	-0.00985449	-0.00691812	0.00509441
HT8-D5	-0.274575	-0.160012	-0.168911	-0.0105677	0.0425539	-0.0942151	0.0136148	0.0161146	0.116563	-0.134343	-0.024991	-0.00390325	-0.0175133	-0.0655016	-0.00181292	0.0175022	-0.00484035	0.0544495	-0.0201784	-0.0149168	-0.0370003	0.0194196	0.0126309	-0.027308	0.019421	0.00635068	-0.0674368	0.0109587	-0.0128258	0.00860086	-0.0235845	0.00296721	-0.0192873	-0.00991593	0.00588857	-0.0264277	0.014523	0.000886225	-0.00595569	0.00815211	-0.014319	-0.0121609	0.00339185	-0.0039781	0.00578302	0.00473179	0.00202211	-0.00237616	-0.00856156
HT8-D7	0.0168809	-0.204593	0.0130339	0.00942146	-0.0093007	0.010034	-0.0892745	0.0473347	-0.0410064	-0.0200753	-0.0331	0.0849701	0.0342423	0.0558182	0.0444836	0.00167333	-0.00175925	0.0281986	0.040369	0.00664905	0.0234929	0.00351545	0.0474088	-0.00846101	0.0110721	-0.0145776	0.0178017	0.0128917	-0.0129944	0.0195999	-0.0360637	-0.0108499	-0.0183343	-0.036402	0.0224962	0.0068847	-0.00667599	0.00136675	-0.00334643	0.0111119	0.00249947	0.0132189	0.00321527	0.0022706	0.00126277	-0.013471	0.00316131	-0.00498738	-0.00360395
HT9-D3	-0.213788	-0.0505146	-0.138523	0.0997204	-0.0561121	-0.0238402	0.105185	-0.0164568	0.0101447	0.089103	-0.00211499	0.040244	-0.0655624	0.0138083	0.0117967	0.0898368	0.0393714	0.00979919	-0.0504794	-0.000418339	0.0523852	0.0572771	0.036975	-0.0182903	0.0076638	0.0149731	-0.00114394	0.0218413	0.0196717	-0.0264026	0.0196802	-0.0236575	0.00507158	0.0339318	0.0322558	-0.0138545	-0.00901374	-0.00477188	0.0164878	-0.0250832	-0.00490386	-0.0159961	-0.000573423	0.00898364	0.0145063	0.0130197	0.000105436	-0.000447756	0.00256442
P10	0.0133583	0.092329	-0.0970343	0.00552743	0.0650597	0.0365017	-0.0029186	-0.0215353	-0.0935147	-0.0311363	-0.0228235	-0.0248312	0.0161753	0.000301218	0.0200532	-0.044491	-0.0110213	0.0556428	-0.0390553	-0.0537594	0.0138495	-0.00573679	-0.0265739	0.0190457	0.058927	-0.0281465	-0.0118647	0.0160899	0.00340254	0.0489521	0.0328675	-0.0050205	0.0395203	0.00320439	0.0186859	0.0112689	-0.0159805	0.00214492	0.00365233	-0.0173087	0.0251803	-0.00428066	0.023873	0.00904666	-0.0066186	-0.0068941	0.00544588	0.00662746	-0.00212653
P3	0.0151999	0.0260299	-0.0381768	-0.00683206	0.0803412	-0.04582	-0.0166267	0.0578213	-0.0448885	-0.00642009	0.00326944	0.0492794	0.0108999	-0.00812858	-0.0159385	-0.0564019	0.00238678	-0.0124103	-0.0388878	0.0179523	-0.0295332	0.0369911	0.00731895	-0.0386029	-0.0372986	-0.0442886	-0.00102204	0.0346595	0.017855	0.0569446	0.0358954	-0.0197887	-0.0398803	0.00967147	-0.00914977	-0.00977326	-0.0131204	-0.00419908	-0.00601578	-0.00295096	-0.0385906	0.0212508	-0.00326834	0.000690283	0.0187923	0.000499811	-0.0126064	0.0080109	-0.00890993
HC12-D7	0.0527924	-0.211388	-0.0097401	-0.0998711	0.083923	0.0563297	0.0231334	0.0370759	0.0849014	0.00705593	-0.0111191	-0.0197369	-0.0190264	-0.0535638	0.0256674	-0.0206152	0.0386942	-0.00566499	-0.00702501	0.0123253	0.0452218	0.0209469	0.00624062	0.0258161	0.0117625	-0.0103655	-0.00935425	-0.0254464	-0.0094999	-0.0101627	-0.00448952	-0.00309957	-0.0342151	-0.014183	-0.0333159	-0.00872683	0.00470625	-0.0191726	-0.00131395	-0.016212	0.025866	0.0322417	0.00350682	0.00606539	0.000652897	-0.00079512	0.0196325	-0.00584873	0.00805591
HC13-D3	0.115036	0.00536227	-0.109748	-0.147906	0.0135496	0.0944413	-0.01556	0.0631576	-0.0168671	-0.0251227	0.024956	0.0165238	0.0471488	0.0496463	0.0333721	0.0556274	0.00521336	0.0368166	-0.0204415	-0.0245147	0.00781768	0.0195265	-0.00348602	-0.0127463	-0.0406564	-0.0292414	0.0123866	0.0138909	-0.0242504	-0.0187496	0.00455818	0.0645933	0.0059407	-0.0224888	0.0266153	0.0251102	0.00424842	-0.00218648	-0.000340085	-0.00980096	-0.00574649	-0.0308122	0.00925737	-0.0268689	0.0247166	-0.0101707	-0.0120455	-0.0111478	0.00746034
HC3-D7	0.0309573	0.0410121	-0.0414624	0.0702555	0.0902377	0.03411	-0.0376196	0.0212708	0.00471674	0.00308869	0.0604968	0.00142102	0.0153029	-0.0727328	-0.0122796	-0.0236673	0.049061	0.0205961	-0.00479871	0.0132758	0.059274	-0.0223504	0.0163405	0.000818212	-0.00338184	0.0306621	0.00440492	0.0137241	-0.0236771	0.0219581	-0.0177891	-0.0117535	-0.0122866	-0.0171721	0.00284773	0.025014	-0.0167528	-0.0248561	-0.0025806	0.0355446	0.0106025	0.0169106	-0.0156504	-0.00794577	0.00576273	-0.00559812	0.00153436	0.00781317	-0.0032059
HC6-D7	0.110942	0.0497228	-0.0833652	-0.0804448	-0.0382288	-0.0582508	0.00985664	-0.00992834	-0.00514329	0.0109785	-0.0218069	0.00583224	-0.00906285	0.0576132	-0.0331912	0.010091	0.0127931	-0.00869783	-0.0346999	0.0010033	0.00935678	0.0109783	0.0123669	0.0364083	0.0102584	-0.0633336	0.0207785	-0.00447524	-0.00106025	0.026955	0.00128889	0.0207535	0.00994649	0.0607478	-0.00548477	-0.0378634	-0.0138698	-0.00869438	0.0333948	-0.00283581	-0.0064876	-0.00391563	0.0149672	0.0098671	-0.0281677	0.0119413	-0.00420143	-0.0167405	-0.00508172
HC8-D5	0.0506215	-0.045514	-0.0702065	0.00838035	-0.0495487	-0.0407085	-0.0333644	0.110533	-0.00142995	0.0192815	-0.0100426	0.0347144	-0.0555731	0.0150038	-0.0444398	-0.0693925	-0.0211007	0.0120764	-0.0259684	-0.0392729	0.0374835	-0.0181273	-0.0287726	-0.0198956	-0.0600809	-0.00259317	0.0249056	0.0101452	-0.0111483	-0.0369618	0.0204125	0.00153533	-0.0035506	-0.00765565	-0.038163	0.00338443	-0.0206569	-0.0132717	0.0226151	0.0110552	-0.020809	0.0203714	0.00982882	-0.0261286	0.0184255	0.0151516	0.010998	-0.00449904	0.00926987
HT12-D7	-0.0265817	-0.0616806	-0.0871149	0.102962	-0.0917875	0.0697447	-0.0437679	0.0449436	0.0109696	0.0293072	0.0166361	-0.0344309	-0.0711745	0.0239132	-0.0729193	-0.0207439	-0.0334758	0.00864384	-0.0495982	-0.0280662	-0.00948904	0.000626416	0.0152004	0.0491146	-0.00111524	-5.41952e-05	0.00859496	-0.0289979	-0.00465738	-0.0070215	-0.014892	-0.0369126	-0.014153	-0.0185418	0.037636	0.0108106	-0.0199765	0.0242141	0.0101465	0.0149702	-0.000100143	-0.0295812	-0.00895315	0.0161849	-0.00764033	-0.00447106	0.00469927	-0.00883421	-0.0173456
HT12-H0	0.0978406	-0.0102598	-0.0584181	0.0409339	-0.0153346	0.0388488	-0.00169288	-0.052331	-0.0125561	-0.0177225	0.0163797	0.0353234	-0.004138	0.0414712	-0.0377281	0.00832847	-0.0186816	0.080073	0.0113033	0.00314299	0.0491598	-0.0368306	-0.0080006	-0.0217308	0.00288046	-0.0103976	0.0287186	-0.0121166	0.0157411	0.0041423	-0.00773476	0.00141703	-0.0319106	0.0202298	-0.000502404	-0.0148453	0.0153514	-0.00241044	-0.0110096	0.0314132	0.0345028	0.0252195	-0.0030112	-0.00566496	-0.00471876	0.0360187	-0.00331822	-0.000804815	-0.00753205
HT14-D7	-0.0639877	-0.0534068	0.00449099	0.150732	-0.129708	0.0895447	-0.0457047	0.0370713	0.0135363	0.00202612	0.0503423	-0.014733	-0.0433275	-0.0512098	-0.019178	-0.025067	0.0312883	0.000148305	0.000403469	-0.0318126	-0.0434237	0.0262684	-0.0109878	0.00938374	0.00746464	0.00297845	0.00755252	0.0232535	0.0483128	-0.0108806	-0.00713248	0.0177348	0.0138483	-0.0091517	0.00977175	0.0123206	0.0259231	-0.0217939	0.0169901	0.0127006	0.00960786	0.0260702	0.00892407	-0.00106518	-0.0137149	0.0096717	-0.00206859	0.0131935	-0.00400155
HT6-H0	0.0763785	-0.00614468	0.0442478	0.0621397	-0.0747549	-0.0541495	0.0199401	0.000164709	-0.0415921	-0.0430808	0.0473161	0.0550434	0.00709922	0.0101626	0.000988033	0.022372	0.00417064	-0.0450812	-0.0474669	-0.00714118	0.0120329	0.01914	0.0103033	-0.0275141	0.0402996	0.0182598	-0.0068719	0.0117391	-0.0053208	0.00639262	0.0214888	-0.00173386	-0.0117331	0.00139875	-0.0138896	-0.00847112	-0.0168246	0.030437	0.00350826	0.0535501	0.00247098	-0.0120437	0.00973776	-0.00581094	-0.00307922	-0.035211	-0.00676487	0.0195131	-0.00305675
HT9-D5	-0.0558128	-0.211723	-0.0620552	0.00207917	-0.0406442	-0.0412003	-0.066217	0.0526377	0.00934954	-0.000874158	0.0854192	0.00189507	0.0287114	0.0400232	-0.030635	-0.00205741	-0.000370087	-0.0578387	-0.0224894	-0.0130941	0.013572	-0.0344211	-0.0489093	0.0252965	0.00693554	-0.0153653	0.00561195	0.0121999	-0.00631565	0.00279791	-0.0111726	0.00718388	-0.0238339	0.0255853	0.00244474	-0.00536285	-0.000838114	-0.00990163	-0.0129381	-0.00626864	-0.00360686	0.015818	-0.00461021	-0.0144764	0.00406739	-0.00562124	-0.0098206	0.0170095	-0.00592882
P1	-0.00702577	-0.0425732	-0.132688	0.124898	-0.144503	0.0633093	-0.0552923	-0.0145813	-0.0462094	-0.0752394	-0.0172645	0.00997462	-0.113659	-0.0197732	-0.0172265	0.000660638	0.0429607	-0.0617062	0.0592446	-0.0119939	-0.0248813	0.00368008	0.00717416	-0.0102812	0.0123919	-0.00109479	0.00892073	-0.0138093	0.033086	0.0191002	0.0242296	0.0018069	0.00393947	-0.0232002	0.00368068	-0.019954	-0.0266551	-0.00743251	-0.00576975	-0.0194031	-0.0188115	0.00767023	-0.0017518	-0.0266486	-0.0111226	-0.0132287	0.00283673	-0.00906774	0.0103819
P6	0.0521153	0.0512842	-0.0505676	0.0071909	0.0691945	-0.0671264	0.00271456	0.0183822	-0.0785726	-0.0320476	0.00297959	0.00856936	0.01626	0.0192178	-0.0338626	-0.03314	-0.0529308	-0.027258	-0.00574023	0.0669674	-0.00936715	0.0161399	-0.0283687	0.00639381	-0.0439064	-0.00325465	0.00999084	-0.00780203	-0.0289221	-0.0157981	-0.0334524	0.00195649	-0.0327603	0.000884774	-0.0152346	-0.000179697	-0.00674614	-0.0260657	0.00277154	-0.000502711	-0.00743737	-0.036797	0.0118642	-0.000385803	-0.0231396	0.0130014	0.0139948	0.0129287	0.00849972
HC14-D5	0.0519327	0.0176542	-0.0166821	0.0352401	0.108758	0.0207771	-0.0216491	-0.00160279	0.0293263	0.0241252	0.0296035	-0.013785	0.0332059	-0.0543283	0.017152	-0.00951771	-0.0168315	0.0111946	0.0189698	0.01736	-0.0391571	-0.0334475	0.00685797	-0.00400373	-0.0123825	0.020371	0.01325	-0.0245952	0.0016052	0.0169458	0.0087278	-0.0196636	0.00659741	0.00123133	0.000480257	-0.0162913	0.0184221	0.00193924	0.00604255	-0.0266205	-0.00532479	0.00423717	-0.00535689	0.0223287	0.00225713	0.0229319	0.00105499	0.00695332	-0.0106814
HC15-D3	0.0935733	-0.00386838	-0.0180781	-0.00705806	0.0241613	0.0455495	-0.00741432	0.0129596	-0.0480847	0.0381379	0.00663988	0.00419205	-0.0169907	-0.0206052	-0.00111701	0.027293	-0.0333999	0.0602118	-0.0438625	0.0117347	-0.00829119	0.0167197	-0.00350872	-0.00432795	-0.0256855	0.0313017	-0.0256766	-0.00204483	-0.0110773	-0.0264447	0.0454523	-0.00314895	0.00458234	0.00174544	-0.039049	0.0114812	-0.0411428	0.0149526	0.0091172	-0.0173437	0.0186117	-0.0144368	-0.0295901	0.0028591	-0.00732279	-0.0145529	-0.0116389	-0.0128054	-0.0154138
HC2-D5	0.065596	-0.0218938	0.0529003	-0.0430962	0.037676	-0.0635322	0.125814	0.0428984	0.0920686	0.0369159	0.0523561	-0.00548202	-0.0161384	-0.0555775	-0.007874	0.0274348	-0.00454347	0.0142158	0.013177	0.0153687	-0.0280129	0.0140825	0.0230649	-0.0133621	-0.0109541	0.0240477	0.0213293	0.0398236	-0.0126759	0.0347723	-0.019389	-0.00359274	0.0255566	-0.00278435	-0.017827	0.00148052	-0.0366925	0.0202923	-0.0147667	0.0136553	-0.0251811	0.00977712	-0.00972725	0.00550098	-0.0066465	-0.00233248	0.00201531	-0.000320117	-0.00425879
HC3-H0	0.115599	-0.0151979	0.0235969	0.0288966	-0.0383001	-0.00127107	-0.0100972	0.0340874	0.0189271	0.00295528	-0.0312468	0.00096842	0.0320233	0.0128135	0.0461096	-0.0317025	0.0265781	0.000957322	0.00656779	-0.00145421	-0.0230694	-0.0218115	0.00979865	-0.014012	0.0554898	0.00353227	0.0163265	-0.0147353	0.00911789	0.0201961	0.0136967	0.0112144	-0.00981652	0.00987646	0.0200708	0.0232967	-0.0380246	-0.0153778	0.0248441	-0.0353256	-0.00447837	0.000804552	-0.0172813	-0.0335401	-0.00326265	0.00507243	-0.0207991	-0.00582881	0.00532006
HC8-D3	0.109913	-0.0658524	-0.0466447	0.0285013	-0.0383273	0.0371998	0.0833087	0.0737033	-0.0143118	-0.098326	-0.0333238	-0.00441386	-0.0336433	0.0130727	-0.0108001	0.023602	-0.00516913	0.0199423	-0.0599795	0.0125132	-0.0658545	-0.00793595	-0.024332	0.00898403	0.00898812	-0.00416843	-0.00199764	-0.0164414	-0.00759613	0.0178459	-0.0329637	0.0317807	-0.012868	-0.00672179	-0.015218	0.01579	0.0152926	0.00380785	-0.0221699	0.00131022	-0.000674087	-0.00342225	0.00443455	0.00924422	0.0150351	-0.0180772	0.0136039	-0.000321786	0.00289331
HC9-D7	0.0953677	0.0013131	-0.0690822	0.0171614	-0.0616548	-0.0999842	-0.011535	0.0128038	0.0815331	0.000447102	0.0231677	0.0336044	-0.00464144	0.0033535	0.0223195	-0.0492626	0.014277	0.0286964	-0.0146904	-0.00385857	0.0251227	0.0394673	0.0249499	-0.00912037	-0.0192542	-0.0314578	-0.0275152	0.012984	0.00675296	0.00980041	-0.0199839	-0.00991338	-0.0173399	-0.028736	0.00665382	0.0394029	0.0230669	0.0479021	0.0226733	-0.0168296	0.00214883	-0.00563982	-0.0101309	-0.0107576	-0.00962949	0.00867135	0.00853767	-0.0025106	-0.0041784
HC9-H0	0.0903787	0.0538885	0.0233137	-0.00201365	-0.0196831	0.0188111	0.0130851	-0.0742252	-0.0571033	0.054269	-0.0170131	-0.0367438	0.00225886	0.0638159	0.0189085	-0.0379894	0.0147887	-0.0601989	0.0282229	-0.00920241	-0.0196258	0.0221455	0.0147743	0.046562	0.0168244	0.0396566	-0.0140441	0.0487178	-0.00956402	-0.0109292	-0.0323974	0.00317098	0.0112096	-0.0250967	-0.0215651	0.0111843	-0.0150094	-0.0264687	0.0168333	0.0281211	0.0257107	-0.0346723	-0.0112897	-0.0195766	0.00656145	0.00591523	0.0129054	-0.00332929	-0.0107253
HT15-D7	-0.124993	-0.0833014	0.0755293	-0.000751673	0.0493891	0.0829641	-0.173155	-0.0791744	-0.0306424	-0.114272	0.00524162	0.0372097	-0.0728459	-0.0814103	0.0143517	0.0151348	-0.0495307	0.00798232	-0.0222566	-0.011118	-0.0171227	-0.0106318	0.0748279	-0.0176431	0.0124436	-0.0419861	-0.00369965	0.0162621	-0.0115947	-0.0379254	-0.00530269	-0.0255346	0.0511856	0.0268544	-0.0172049	-0.00903984	0.0108832	-0.0274442	-0.02075	0.00550386	0.00272595	-0.0151864	0.00616412	-0.000566783	0.00452598	0.0025151	0.00670514	-0.00508901	-0.00402897
HT2-H0	0.074582	0.027284	0.0337401	0.0185704	-0.0603683	-0.0325469	-0.00503494	-0.0931466	0.0203366	-0.0123451	0.0379816	0.0270237	-0.0617228	-0.0190838	-0.0572275	0.0563469	0.00307055	-0.015716	-0.0423021	0.000379662	0.0123974	-0.0197689	-0.0256569	0.0216033	-0.0219819	-0.0218864	0.0127794	0.040231	0.0215111	0.0391546	-0.0212586	0.0237676	0.00606374	-0.0123455	-0.00161192	0.0340693	0.017621	0.0134469	-0.0137197	0.0152072	0.00550545	-0.0296413	0.0411596	0.00129929	-0.00717269	0.0290852	-0.00466345	0.0163858	-5.31892e-05
P2	0.0712635	0.0923607	0.0390921	-0.0570795	-0.0356872	0.064965	0.00795668	0.00796171	-0.131198	0.0360601	-0.00163665	-0.0510222	0.0077463	0.00298723	0.0154879	-0.0134814	-0.018354	0.0356638	-0.0558182	-0.0279698	-0.0524956	0.0349962	-0.00206376	0.0359006	-0.00650762	0.0116043	-0.016984	0.00142436	-0.000909088	0.00845645	0.0147058	0.00679367	-0.0298348	-0.00518019	0.0170195	0.00446647	0.0210465	-0.0164644	-0.0135167	0.0128916	-0.0188258	0.0207741	-0.0135582	-0.0297361	0.0106387	-0.0101078	0.00558388	-0.0149464	0.00091775
P7	0.10955	-0.0506404	-0.0694891	0.0159742	-0.0312194	0.0313808	0.104282	0.0747615	0.00245204	-0.0785402	-0.00875776	0.0122737	0.0305603	0.0628856	-0.0119037	-0.059449	0.00255955	-0.00628606	-0.021823	-0.00284052	-0.0191585	0.00777405	0.033108	-0.0161838	0.0275841	0.0108166	0.027803	0.00729031	-0.0274226	-0.0160492	-0.039959	-0.0474721	0.0298031	0.0134234	-0.00265955	-0.00168023	0.024145	-0.0273992	0.0150568	-0.0273318	-0.0202395	0.00648457	-0.018807	0.00379509	0.00782751	0.0100166	-0.00342785	-0.0141022	-0.0128688
P9	0.0674684	-0.0620205	-0.0599759	0.023155	0.010875	0.0451756	-0.00217868	0.0346944	-0.0912336	0.0137965	-0.00520776	0.0422814	-0.0116141	-0.0350708	-0.0379203	0.00176793	0.0137974	0.00120394	0.0363621	-0.00861221	-0.0375917	0.017823	0.0371705	0.033417	-0.03749	0.00638961	-0.036549	-0.011694	0.0166645	0.0133543	-0.0174106	-0.00558195	-0.0145323	0.00128113	0.00358101	-0.00758301	-0.0168019	0.00909894	0.00343521	-0.00953013	0.00852515	-0.00120728	-0.00968631	0.0152964	-0.0180475	0.0083744	0.0185251	0.00485889	0.0106278
P5	0.0160633	0.112768	-0.0239357	-0.0505796	0.0757113	-0.0651712	0.0124841	-0.000739494	-0.073716	-0.0200187	0.0455809	0.00140156	0.0217166	-0.0482908	-0.0191275	-0.00774103	-0.047043	-0.0317669	0.0368553	-0.0498837	0.0440646	0.0280775	0.0189062	-0.0443414	-0.0106262	-0.00677779	-0.014598	-0.0229214	0.0196489	-0.0158478	-0.0474425	0.0294376	0.0162409	0.0112654	0.0338119	0.0288465	-0.0127264	-0.0174034	-0.0387032	-0.0221897	0.018459	0.00221814	0.0211209	-0.0122166	0.00420392	0.00375637	-0.0169674	-0.00439767	0.00863952
HC15-D5	0.0471549	0.0978486	-0.00186755	-0.000380007	0.0560915	-0.0658183	-0.0308514	-0.0433248	0.0162823	-0.0390841	0.0180212	0.0716034	-0.0265538	-0.0112307	0.0107972	0.0319789	-0.014988	0.0107659	0.0645257	0.0296553	-0.00331117	0.000732944	0.00180437	0.0566569	0.0390283	-0.0322966	0.0416376	-0.0500218	0.028906	0.016985	0.0132553	-0.00256482	-0.000777513	-0.0243251	-0.0367202	0.00175183	-0.0114912	0.0241637	-0.0175802	-0.00972228	0.00930191	-0.0113087	-0.00894929	-0.0149146	0.0140975	-0.000861346	-0.00148423	0.00172441	-0.00997974
HC7-D3	0.0679223	0.00540248	0.021075	-0.0294416	-0.0674125	-0.108919	0.0185807	0.000817751	0.0377754	0.00201887	-0.0667368	0.0358013	0.0173908	-0.00474986	-0.026512	0.0334742	-0.0115761	0.0262041	-0.0152921	-0.00272274	-0.0591272	-0.0590853	-0.0144795	-0.0503161	-0.000779157	-0.0240568	-0.0121446	-0.00974356	0.0218136	0.0131909	-0.00859507	0.030723	0.00265443	0.00415739	0.0149327	0.014948	-0.00496613	-0.00631691	0.0270102	0.00434692	0.00830788	0.00637603	-0.0406669	0.000366811	0.00823298	-0.0129239	0.0322601	-0.00903438	-0.01167
HT3-D3	-0.318895	-0.118002	-0.0876322	0.00650593	0.111887	-0.0698405	0.0869919	-0.0523511	0.0182633	-0.0430104	-0.0110659	-0.0530564	-0.0168256	0.0316639	0.0280011	-0.0342421	0.0513415	-0.00171547	0.0327695	0.0334955	0.0208561	0.0295214	-0.0293556	-0.0308485	0.0258284	0.0170129	0.0172005	-0.0137792	0.0198826	0.0147829	0.00153378	0.0195761	0.0260599	-0.0333738	-0.00381355	-0.00632893	-0.0145171	-0.000725855	-0.00997096	0.00765952	0.00412328	0.0119458	0.00732705	-0.00100362	0.00677552	-0.0109646	0.00111027	0.0034061	-0.00974521
P4	-0.0130865	-0.00771968	-0.0324604	0.0544226	0.0297715	-0.0672256	-0.0166614	0.0834515	-0.0785256	-0.0532282	-0.0343251	0.0204534	-0.013126	0.00720534	0.00592364	-0.0425262	-0.0288804	-0.0581427	0.0223977	0.00102788	-0.0138951	0.00864913	0.00927968	0.00348676	-0.0247805	0.0126333	-0.0102744	-0.0545051	0.0239967	0.0122977	0.0369709	0.00500787	-0.0269853	-0.0169901	0.028199	0.000780517	0.0112294	0.0032955	0.0118935	0.0137701	0.0205446	-0.00497866	0.00748476	0.00632372	-0.00227423	-0.00206055	-0.016748	-0.00610963	0.00641578
HC5-D7	0.0665812	-0.0190084	-0.0691472	-0.108684	0.0185038	-0.0857238	-0.0110969	-0.0595237	-0.0619443	0.0275638	0.019791	-0.0465961	-0.0354241	0.0648597	0.0502121	-0.0116028	-0.0341667	0.020907	0.000103029	-0.00976848	0.0116796	-0.0344793	0.0174083	0.026097	-0.0276216	0.0407584	-0.0138134	-0.000617709	0.0467293	-0.00799939	0.0215176	0.00208	0.023508	0.0103049	-0.00724369	-0.0120539	0.0370141	0.0101833	-0.0196609	-0.0145569	-0.00632984	-0.00325753	-0.0041433	0.0136398	0.00660868	-0.0154068	0.0185745	-0.00300581	-0.0113271
HT15-H0	0.110906	0.0120905	-0.0455363	-0.0277768	0.00846374	0.037992	0.0100521	0.0319579	-0.00232843	0.0914645	0.0245926	-0.00676294	0.0326252	-0.0181064	0.0453717	0.00749782	0.0451222	0.00716861	0.0302354	-0.0386993	-0.0282915	-0.0240234	-0.0301297	0.0371365	-0.000934246	-0.0395348	-0.0146803	0.0119264	-0.0141739	0.0152959	-0.0333727	-0.0060846	-0.000771067	-0.0207524	0.0253346	-0.0321262	-0.0122066	-0.00197669	-0.0015685	0.0302658	0.00359278	0.00329912	-0.0110773	0.0227314	0.0223029	-0.00620822	0.010019	-0.0107169	-0.00372228
HT4-D7	-0.0914426	-0.220362	0.0124839	-0.0611781	0.034923	0.0327897	0.0667734	0.0454703	-0.00627358	-0.00626831	0.109603	0.0027264	-0.00495666	0.0104266	-0.0280203	0.0157584	-0.0163553	-0.0379536	-0.0536202	0.00573803	-0.0345136	0.00771311	-0.0120421	-0.0143255	0.0153456	0.024653	0.0479446	-0.0100052	0.0292164	0.0293503	-0.00305897	-0.0246952	0.00408322	0.00859947	-0.0228598	0.0214055	0.0234818	0.0108433	-0.00911086	0.00095306	0.00695537	0.0134218	0.00919711	0.0125258	-0.00179541	0.00988594	-0.00393007	-0.0254537	0.00859832
HT5-D3	-0.228827	0.0735241	0.0917197	0.0795657	-0.017203	0.0125081	0.0283657	0.0183207	0.095136	-0.105993	0.0689917	-0.0415039	0.0444125	0.137167	0.0724648	0.00105686	0.000919837	0.00835307	-0.00337932	0.0327491	-0.0160331	0.0236783	0.00261385	0.0380382	-0.0496484	0.00663453	-0.0109052	-0.0324832	0.0209178	-0.0109594	0.00489959	-0.0189487	-0.0171238	0.017408	0.0313822	0.020953	-0.0328643	0.014616	-0.00495505	0.00719511	-0.00048366	-0.00544217	0.0158	-0.00794604	0.000804224	0.0179552	0.0109518	0.0126358	-0.00214925
HC11-D3	0.0946558	-0.00321007	-0.0284329	0.0157982	-0.0453422	-0.0879029	-0.00700307	0.0212787	0.0358549	-0.0309576	-0.0254581	0.0293138	0.00618766	0.041221	0.0217183	0.0139012	0.0419668	0.00806129	0.0101603	0.00520149	-0.0897916	0.0180557	0.0195352	0.00377188	-0.0347714	0.00128032	-0.00957036	-0.00566607	-0.000154533	0.00305791	-0.00126389	-0.0273853	-0.0108187	0.042504	-0.0115528	-0.0219631	-0.0257529	-0.00875707	-0.0287176	-0.00892271	0.00143169	0.00931138	0.030728	0.00420411	0.0014096	0.00226769	-0.0197383	0.00381003	-0.00126569
HC13-H0	0.15454	0.00748527	-0.0206109	-0.0107659	-0.0330703	-0.0359065	-0.0139726	0.00496617	0.0109646	-0.00514995	-0.0818903	-0.0327075	0.0124763	-0.0249643	-0.0192345	0.0046962	-0.0338639	-0.00850879	0.0262097	0.00378715	0.0494892	-0.027629	0.0147464	-0.0124069	0.00228088	0.0174077	-0.0370141	0.0124445	-0.0207874	-0.026513	-0.023293	-0.0369219	-0.00357022	-0.006152	-0.00254672	0.00181363	0.00557464	0.022063	-0.0385466	-0.00368052	-0.00218209	-0.0224133	0.00695642	0.0224036	-0.000259685	-0.0279693	-0.0162385	-0.00298498	-0.0102362
HT3-D5	-0.107812	0.0578196	-0.079533	0.0457798	0.0682424	-0.0976046	0.0310191	-0.0148171	-0.0191148	0.01337	0.0279408	-0.0191341	0.0593075	-0.0033152	-0.0303951	0.0154691	0.0302028	0.0162489	0.00124993	-0.0594331	0.0176274	-0.0274868	0.017162	-0.0195862	0.0194676	0.0491537	0.0103952	0.0259759	-0.0114697	0.0199062	-0.00488313	0.00946743	-0.0333636	0.0472074	-0.0210171	0.0154008	0.0018851	-0.000238938	0.0152209	-0.00139394	0.0304049	-0.00361587	0.00548083	-0.0191448	0.0195576	0.00891842	0.0114923	-0.0166501	-0.0122024
HC4-D5	0.0473681	0.0686636	0.0329247	0.0583941	0.063501	0.0323706	-0.0266658	0.0118083	-0.0326992	-0.0402766	0.0216812	0.0373337	0.0412084	0.0132116	0.0218073	-0.029855	0.0423807	0.0318274	-0.0319174	-0.00476341	0.00722603	0.0255254	-0.00841057	-0.0269766	0.026118	-0.0351161	0.0248702	0.0122371	-0.017926	-0.0322625	0.00569283	-0.0115409	-0.00972878	0.0113214	-0.0150169	0.0152956	0.00273234	0.0174054	-0.0237496	0.0390097	-0.0316197	-0.0142692	-0.0226421	-0.00266272	-0.0132536	0.00131674	-0.00514742	-0.0114415	0.0122915
HC1-D3	0.09198	-0.0419413	-0.0294634	-0.0343915	-0.0240705	0.0156125	0.0741799	0.0536215	0.0276355	-0.0478445	-0.152242	-0.058872	-0.0804618	-0.0104581	-0.0163273	-0.0685811	0.00980935	0.0036277	0.0165828	-0.0383036	0.0411157	0.0255199	-0.0279525	-0.00715166	0.0144064	0.000984919	-0.0270329	-0.0101722	0.043446	0.0102138	-0.0130685	0.00673785	0.0444501	0.0244908	0.00204552	-0.00273507	0.0145222	0.0171877	-0.0106997	0.00856978	-0.00397548	-0.0300927	-0.00525054	-0.0172666	-0.00214022	0.0110734	-0.00165779	-0.00312017	0.0171496
HC15-D7	0.105744	0.0856771	-0.103141	-0.126204	-0.00350713	-0.00900676	-0.00327381	0.0248221	0.0268361	0.106324	0.0373848	0.00703682	-0.00737684	0.0203382	0.0362922	0.00301361	-0.0154877	-0.00349683	-0.0195161	-0.00552857	0.00242202	-0.0496185	-0.0223372	-0.0102619	0.00716408	-0.0169537	-0.00639586	-0.0332867	0.0335776	0.00408613	0.0121273	-0.0443545	0.0196692	0.00375628	-0.0210707	-0.003977	-0.0306373	-0.0272224	-0.0194022	0.0117421	0.0221454	0.00391603	-0.0039307	-0.0065783	-0.0143176	-0.000914327	0.000947637	-0.0135041	-0.00672449
HC9-D3	0.109543	0.00294706	-0.0616047	-0.0635214	0.025598	0.0589275	0.136367	0.0169769	-0.0761187	-0.0407769	-0.0185153	-0.0296517	0.0089184	0.0201193	0.00124564	-0.0266022	0.0166282	-0.00726419	0.0556533	-0.0157948	-0.0165355	-0.0146085	-0.0116562	0.0079312	0.0157791	0.0127374	0.00617024	-0.0226167	-1.68834e-05	-0.0108952	0.0172735	0.0320883	0.0152643	0.0207358	-0.0374322	0.0229262	0.00227249	0.0069555	-0.0225734	0.0210223	0.0155447	0.0243787	0.00125683	-0.0082184	-0.0184816	0.00459254	0.00129771	0.000951555	-0.0155652
HT2-D7	0.0379876	0.0070533	0.0278097	0.0568421	-0.0561447	-0.0500921	0.000692049	0.0869585	-0.00693215	0.0399706	0.0736089	0.0392538	8.16467e-05	-0.0102051	0.0120982	0.0506303	-0.0399294	0.0570596	0.0134664	0.0358687	-0.00989479	0.0395468	-0.0450808	0.0304333	0.0512615	0.0162963	0.000215183	-0.0158013	0.00825337	-0.0254214	0.0121612	-0.0177037	0.024303	-0.0169148	-0.00839925	-0.011473	-0.00196554	-0.0272526	-0.0202424	0.00185301	-0.00129161	-0.00817746	0.00925161	-0.00506508	-0.0065177	0.0125846	-0.000609018	-0.0187355	0.00713814
HC4-D7	0.0308315	0.0268782	-0.0131508	0.0767238	0.0282306	-0.0886583	-0.020029	0.049022	-0.0290079	-0.0708236	0.0355682	0.0655923	0.00039673	-0.00926046	-0.0165467	0.0433041	-0.0196905	0.00394062	0.0213057	0.0276886	-0.0136516	-0.0208126	-0.022332	0.0469781	0.0122207	0.0314895	-0.00668679	-0.00706994	-0.0274734	-0.0383845	-0.0208219	0.00232953	0.0494463	-0.0164462	-0.0166909	0.010541	-0.00379337	0.0296108	0.0121023	-0.0192922	0.0134164	0.0296252	-0.00482622	0.00089501	-0.00149075	-0.00238867	-0.0164426	0.0167933	0.002148
HC13-D5	-0.0115969	-0.164366	0.0345555	-0.0595105	-0.015798	-0.114277	-0.0352614	-0.0664996	0.0229872	-0.0260737	-0.0613464	-0.018073	0.0425151	-0.00597618	-0.0418658	0.00671114	-0.0149297	-0.0302176	0.0178611	-0.017803	-0.0499975	0.0111409	-0.00536551	-0.0185272	-0.0361659	-0.0201611	-0.0158423	0.0175136	0.00507446	-0.00956075	-0.00209275	-0.00422704	-0.00450075	-0.0214288	-0.0170593	0.00182523	-0.028336	-0.00493451	0.0478282	0.0145782	0.0360682	0.0181991	0.00624482	0.0296578	-0.00449474	0.00635181	-0.0268779	-0.0128524	0.00710373
HC1-H0	0.0627174	-0.0416861	0.0548245	-0.0205477	-0.0623594	0.0142083	-0.0376874	0.0461761	-0.0596044	-0.0564153	-0.00856432	-0.0714478	0.0757754	-0.0265201	0.0250059	-0.0226749	-0.0124457	0.00447195	-0.0251886	-0.0397962	0.00527974	0.0289685	-0.0471841	-0.00361302	0.00395063	0.0342402	0.024862	0.0429995	0.00782586	-0.0262223	0.0574577	0.0237136	-0.00156754	0.00607246	0.0186539	0.0182857	-0.00200501	0.00331465	-0.021843	-0.0157123	-0.022924	-3.71126e-05	-0.00428864	0.0460788	-0.0209025	0.0124916	-0.00281548	-0.00553723	-0.0150574
HC3-D3	0.0908921	0.0155664	-0.0815503	0.0288468	-0.0707138	-0.00220303	-0.0364544	0.0245268	0.0656444	0.0250847	-0.0520207	-0.0839811	0.0154481	-0.0114202	0.033685	-0.0067708	-0.033774	0.0493962	0.0259847	0.0180808	-0.0163789	0.0195815	-0.0179958	0.0481304	0.0336678	-0.0143907	0.0042967	0.0366872	-0.0129321	-0.0389358	-0.00176054	-0.0380164	-0.0147967	0.017059	0.00576586	0.0206452	0.00578717	0.000647398	-0.0108951	0.00754482	-0.00900436	0.0219033	0.0241167	-0.0129976	-0.00721462	0.0101135	0.0159785	0.0320332	0.000355467
HT11-H0	0.189319	0.108564	0.000670728	-0.128639	0.000414705	0.0487139	-0.00280444	0.0073024	0.0436487	0.000327829	-0.0444265	0.052014	0.00767513	0.0253473	-0.0383643	0.0669986	0.000851309	0.0238399	0.026615	0.0524794	-0.0278647	0.0304277	-0.00743041	-0.0128267	0.00393293	-0.0152447	0.0498891	0.0580533	0.034787	0.000612622	0.0188208	-0.0176154	0.000914281	-0.0296349	0.00346615	-0.000824879	0.0240586	0.00442979	0.0121569	0.00375845	0.00822927	0.00250205	-0.0082351	0.0155903	0.0166135	-0.0229558	-0.00873544	0.0137003	0.00854866
HC6-H0	0.113797	0.111673	0.116055	-0.0773176	-0.0542195	0.0618257	-0.0263826	-0.021135	0.0187686	0.0310494	-0.0249339	-0.0119407	-0.0135982	-1.58123e-05	-0.00496501	-0.00870726	-0.00125747	0.0234802	-0.0278449	0.00189951	-0.00245561	-0.0143394	0.0152484	-0.0618897	-0.0229859	-0.0333051	0.0180378	-0.0525934	-0.0108886	0.019343	-0.0284725	0.00342635	-0.0296348	-0.00657444	-0.0129601	0.0220245	-0.000670645	-0.0192633	-0.0155162	-0.0338457	0.00237986	-0.0187903	0.00858796	-0.00147662	0.00237034	-0.00169045	-0.00425388	0.0270104	-0.013789
HC11-D7	0.12228	0.021344	0.0216665	-0.00894478	-0.0097553	0.0436312	0.00310782	-0.0215277	0.0277338	0.0239299	-0.00840783	-0.0267019	0.0238709	-0.0280339	0.0273662	-0.0144601	0.026975	-0.0243777	-0.0188037	-0.0327701	0.00527271	-0.00582525	0.00510221	-0.0464942	-0.0321225	-0.0453776	-0.00523557	0.0110398	-0.00418177	-0.0297737	0.0192944	0.0345172	0.0151556	-0.0173093	-0.0351755	0.0166853	-0.0121558	0.0180515	-0.00308649	-0.0218024	0.00310685	0.0126268	0.024132	-0.00189134	-0.0268722	0.0105354	0.0150737	-0.000317757	-0.00877947
HT3-H0	0.11582	0.05146	0.0942646	-0.00486887	-0.0426354	0.0226883	-0.0081327	-0.0278748	-0.0100396	0.00394149	0.00955253	0.0251888	0.00138452	-0.0303445	-0.0152971	-0.0271314	0.074858	-0.00557979	0.016686	0.00935081	0.000801622	-0.000334499	0.0188772	0.0102928	-0.011628	-0.00246535	0.0597496	-0.01965	-0.0288458	-0.0207348	6.19899e-05	0.0134536	-0.00983057	0.0127716	0.0315636	-0.0301572	0.0433884	0.0290556	0.0223961	0.000610237	0.0181842	0.0050132	-0.00441714	-0.0145408	-0.00742486	0.00198848	0.00113146	-0.0158461	-0.00114947
HC11-H0	0.031284	0.0282556	0.11341	-0.00432802	0.0422724	-0.0808961	-0.0446913	-0.00452371	0.0447688	-0.0692762	0.0251661	0.0184419	0.0759814	0.0166011	0.0328774	-0.0493888	-0.0222265	-0.0332875	-0.0129317	-0.0165122	0.018051	0.000945981	0.0159633	0.0189986	-0.0326581	0.00307911	-0.00691402	-0.000262602	0.0116274	-0.00105415	0.00729621	0.0177646	0.0696923	-0.0015948	-0.011513	-0.0182663	-0.0229595	-0.00827456	0.0155746	0.0334574	-0.0183412	-0.00630558	0.0227589	0.0105791	0.0249577	-0.00792322	0.0172022	-0.0100703	0.0033302
HC1-D7	0.0611658	0.0251959	0.055341	-0.0203091	-0.0463466	-0.127956	0.00667189	0.00603094	-0.00600668	0.0115423	-0.0362876	-0.035794	-0.0275486	-0.0146477	0.033295	0.0163457	-0.0252765	0.016358	-0.00742645	-0.0219653	0.0143542	0.00729574	0.0714807	0.00923562	0.0194611	0.0228767	-0.00280679	0.00546912	-0.0164787	0.0482057	0.010912	0.00178546	0.00904303	0.0110335	-0.00331046	-0.00684703	0.00387598	-0.00573351	-0.02527	0.0261554	0.0107666	0.0124067	-0.00723763	-0.0183086	0.0259006	0.0162898	-0.00317165	0.00762337	0.0104011
HT13-H0	0.0977386	-0.00532652	0.0169986	0.0438243	0.00212829	0.0251706	0.0244936	-0.0455684	0.0136317	0.0425138	0.0143247	-0.0206181	0.0358555	0.00261393	-0.00628236	-0.0202978	0.0153661	-0.00658043	-0.0342088	0.0047949	0.0309373	-0.000318105	-0.0217378	-0.0120262	-0.0451021	0.00357278	0.00235248	0.002607	0.0270354	-0.00502331	-0.0113283	-0.021844	0.0404213	-0.0144578	0.00647166	-0.0361963	0.00639234	0.0540573	-0.00359419	-0.0415763	0.0179763	0.00976538	0.016116	-0.0294551	0.0372729	-0.00250597	0.006103	-0.00802298	0.00547283
HC10-D3	0.0431977	-0.160728	0.0502529	-0.0471076	0.0434518	0.0147205	-0.0704967	-0.0598665	-0.000812216	0.0343996	0.00490789	0.0042901	0.014002	0.0307155	-0.0655154	-0.0106386	0.0365683	-0.0392784	0.0280572	0.0462891	0.00702515	-0.0191787	0.00472049	-0.00106331	-0.0248025	0.0260067	-0.0239613	0.0299218	-0.00592582	0.0200226	-0.0117934	0.00957542	0.0503473	-0.000553128	0.03432	0.00815994	-0.00068003	-0.0358015	-0.013243	-0.0165106	-0.018315	0.00164021	0.000355126	-0.0209341	-0.0258609	-0.00966588	-0.00891292	-0.000820205	-0.0135535
HC15-H0	0.123408	0.0491454	-0.0188712	0.0160448	-0.053892	0.0311515	-0.0321651	-0.1211	0.0752135	-0.0212239	-0.00969681	0.00680684	-0.0386239	-0.0274593	-0.0514196	-0.00730004	-0.0026746	0.0385535	0.025856	0.0311756	0.0294367	0.065596	-0.0189839	0.00885796	-0.00372725	0.0266195	0.0290841	0.0120494	-0.0150563	0.0233056	0.0344617	0.00175885	0.00131518	0.0263382	0.0235982	-0.00514548	-0.00638577	-0.000731307	-0.00191277	0.0134029	-0.00620118	0.00939928	0.0132676	0.00257708	-0.0135311	0.00493113	0.0117787	-0.0110732	-0.013006
HC14-D7	0.0532164	0.057159	-0.0480877	0.030135	0.0708012	0.0304515	-0.0188532	-0.0993973	-0.00376639	-0.0323971	0.0215061	0.0168985	-0.00478183	-0.00218521	-0.0265996	0.0158184	-0.0284985	-0.055599	0.0309337	-0.0844148	-0.00826477	-0.047268	-0.0451921	0.0208251	0.0128046	0.023564	0.0408861	-0.00861204	-0.00550503	0.0138574	0.00441515	-0.0253608	-0.00359857	0.0397961	0.0221924	-0.015459	-0.00681747	-0.00377878	-0.00248448	-0.0281882	-0.0212659	0.00490438	-0.00746243	0.019716	0.00258514	-0.00830803	0.00652802	0.0106594	0.0139844
HC10-H0	0.0162602	-0.179314	0.0371233	-0.164865	0.0727507	0.0507879	0.0281086	0.0440992	0.0397964	0.0151826	-0.0627174	-0.0984478	-0.0134954	-0.0544445	-0.0495667	0.0234681	-0.0284673	-0.005046	0.0446777	0.0449558	-0.00314428	-0.0368507	-0.0230197	-0.0192418	-0.0120502	-0.0148463	0.0192181	-0.0101717	0.00114342	-0.0096752	-0.02084	-0.0205462	-0.0058562	0.0140725	0.0351365	0.00830059	-0.0171055	0.0266498	-0.000288794	0.0112068	-0.0279724	-0.0138957	-0.00697642	-0.00722417	0.00151561	0.0109446	0.003987	-0.00927451	0.00504818
HT11-D5	-0.190345	0.0207168	0.0475105	0.155248	0.0499684	0.0606944	0.0237823	-0.0323576	-0.0915223	0.0899186	-0.0831386	0.0428475	0.0918392	-0.101566	0.00880522	-0.000552172	-0.0691463	-0.0706026	-0.0324158	0.0382905	-0.0182253	-0.00605967	0.0444312	0.0174958	0.0038282	0.0165988	0.0324779	0.0197813	0.0323539	-0.0167123	-0.00573843	0.0120029	-0.00152769	0.018352	0.0108858	0.0253062	0.00729834	0.0207996	0.00742475	0.00309477	-0.00977831	0.0080646	0.00661664	0.00728696	0.0175074	0.00155514	0.00247148	-0.0136663	0.00225863
HC10-D7	0.105172	-0.0655304	0.0394865	-0.0234599	-0.0409388	0.0052175	-0.0762983	-0.00157663	0.043483	-0.0351275	-0.0368204	0.00737325	-0.00115531	0.0317518	0.0119933	0.0191763	-0.0530493	0.0261907	0.028582	-0.0145515	0.0130017	-0.0719571	0.0269465	0.0240423	0.000896712	0.0573498	-0.00264401	-0.0120233	0.0242045	-0.0215991	0.0165576	0.0622779	-0.0315881	0.00514762	-0.0166748	-0.0268105	0.00567391	0.00593476	0.00826297	0.0151653	-0.0183779	-0.0336553	-0.0252912	0.0069361	0.00135772	0.0176009	-0.000598396	0.00985049	-0.00167152
HT4-H0	0.0745524	0.0249032	0.154114	0.0322329	-0.0450166	0.0246009	0.00387125	0.0363908	0.0508374	0.0365734	0.00994484	-0.0364838	0.0684846	-0.0342542	-0.0100784	0.000630094	0.0142592	0.00248535	0.0125679	-0.0159986	0.0203383	-0.0406895	-0.00620873	-0.00431658	0.00989846	-0.0132227	-0.0505759	-0.00767701	0.027562	0.000177135	-0.00705115	-0.0113334	0.0160087	0.0106875	0.00865665	-0.00640569	0.00969514	0.000356403	0.000976549	0.0285863	-0.0246643	0.0204218	-0.0028629	-0.0189256	-0.0184817	0.0113848	-0.0224326	0.000830791	-0.00428666
HT1-H0	0.0433067	0.0498278	0.0490682	0.075806	0.0705179	0.0197897	-0.0207637	-0.0720869	0.0616558	-0.00782182	0.000240977	-0.0324832	0.00348646	0.00633239	-0.00479949	-0.0648756	-0.0185902	-0.00480886	-0.0558771	0.0208896	0.0259192	0.00602116	-0.00825587	0.00653537	-0.0259451	-0.00239665	0.0304109	0.0315194	0.000880581	-0.0105498	-0.00881781	-0.00121112	-0.0130281	0.0114177	0.0138177	-0.0378821	0.00897137	0.0105361	-0.0202636	-0.00657083	0.0164746	-0.0104128	-0.0265107	-0.0252914	-0.022555	-0.023071	0.000853644	0.00282622	0.00158314
HT14-H0	0.0977571	0.0146404	0.101198	0.0414892	-0.0396725	0.00810331	-0.0150814	0.00162144	0.0233578	0.0171404	-0.0143644	-0.0212047	0.0348933	-0.0338337	0.0127187	0.00912289	-0.0325188	-0.00601027	-0.0260714	0.0370566	-0.00775096	0.0466761	-0.0240812	-0.00310755	-0.0319706	0.0558472	-0.00571745	0.00625684	0.0171516	0.0511661	-0.0201526	-0.0326931	0.0235054	-0.00383537	-0.0208046	0.0196498	-0.0113677	-0.0227157	0.0169652	-0.0309088	0.0238192	-0.0224312	-0.0168251	-0.0155361	0.000361779	0.0104531	0.0065431	0.0152953	0.00590409
HT1-D5	-0.130668	0.157447	0.106904	-0.0755099	0.0713526	-0.0205384	0.0290062	0.153146	-0.037101	0.0188176	0.018942	0.0185484	-0.110019	-0.0162914	-0.0270962	0.0218665	0.0376877	0.0105552	-0.0104464	0.0257465	0.00567785	-0.0166367	-0.0214851	0.0279922	0.00285771	-0.0180179	-0.0404773	0.0168117	0.0136112	-0.0128474	0.0277458	0.0071309	0.00970281	0.0243376	0.0199378	-0.016824	0.0110814	0.00175156	0.00376678	-0.00828845	0.0124396	-0.00433419	-0.00888677	-0.00179145	0.0258224	0.0101865	-0.0053315	0.0132903	-0.0248105
HC5-H0	0.0928631	0.0201007	0.0698335	0.011418	-0.0226951	0.00576743	0.00588658	-0.0441417	-0.0496363	0.0150991	-0.0272005	-0.0469472	-0.00572845	0.0125968	0.00795831	-0.0118261	-0.00283657	-0.0210125	0.000142697	0.0432423	-0.0345587	0.0032606	0.0800511	0.02143	0.027256	0.0080865	0.00300992	-0.0164251	0.00734288	-0.0364559	-0.0134187	0.00549687	-0.014707	0.016126	-0.00958767	0.00715678	-0.00986042	0.00364783	0.0204176	-0.0171081	-0.0239715	0.0139161	-4.18827e-05	-0.00182829	0.000660992	0.00527718	0.010611	0.0111466	0.0177845
HT5-H0	0.069171	-0.162146	0.0397567	-0.0424108	0.032822	0.00955904	-0.0787335	-0.0584899	-0.0181939	-0.0143704	-0.0117884	0.0251565	-0.0114889	-0.0115104	0.00639517	-0.00438333	0.0835304	-0.0106743	-0.00487751	-0.0154667	0.0393859	0.0199344	-0.0449139	0.0113128	-0.0123371	-0.017953	-0.018455	-0.0141798	-0.00978835	0.00517479	-0.0110447	-0.00663673	0.00135856	0.0139505	-0.0264064	0.0103258	-0.0159388	-0.00254957	-0.000192043	0.00724042	0.00143957	-0.0144485	-0.0089815	0.0332883	0.0186029	0.0135971	0.0106111	0.0029252	0.0186965
HT9-H0	0.0920866	-0.0242775	0.0719008	0.0467841	0.00129759	0.0202995	0.0155368	-0.0400915	0.0094833	0.0233107	0.000222465	0.000350488	0.0064139	0.00436821	0.0197904	0.03518	0.00484088	-0.018184	-0.00586334	0.0185424	0.0164513	0.00721096	0.0152799	-0.0350456	-0.00277681	-0.0126298	0.0247956	-0.0193723	0.0125785	0.0080186	0.00664923	0.0177592	-0.00592116	-0.00383993	0.032129	-0.0159862	-0.00939788	0.00736423	-0.0168241	0.0138529	0.0144999	-0.0117525	-0.0102603	0.0240698	0.00560261	0.0101591	-0.00924267	-0.0108363	0.0117356
HT11-D3	-0.0897676	-0.0966048	0.0855961	-0.0375687	0.190948	0.0849629	-0.0484166	-0.0211662	0.0523966	0.0565053	0.00498292	0.0201556	0.0248797	0.0471843	0.0738486	0.0433133	-0.0372374	-0.00736203	0.0383342	-0.0342984	-0.00463451	0.00575971	-0.0223812	0.0229383	-0.0245575	-0.0138333	0.0166814	0.00674436	0.000622043	0.0294945	0.00839744	-0.0265323	0.0119079	-0.00570749	0.0158251	0.0248571	0.0359697	-0.00670562	0.0199923	0.0226513	-0.0106126	-0.005776	-0.00549958	-0.0111584	-0.00135834	0.0199387	-0.0105367	-0.00955685	-0.00173974
HT10-H0	0.116466	0.0965356	0.0951622	-0.0669705	-0.040022	-0.0456462	-0.00214103	-0.0414246	0.0111394	0.0301233	0.017697	0.0603596	-0.0488564	-0.0180065	0.000328902	0.00908271	-0.0412839	0.0459693	0.0139625	0.00181869	0.00529544	0.036688	-0.0213617	0.00745009	0.00961175	0.00318476	0.0226616	-0.0128221	-0.020768	-0.024782	-0.0128864	0.0169554	-0.016857	0.00538787	-1.92294e-05	-0.00716396	-0.010709	-0.0119309	0.00197481	-0.0104156	0.0128607	0.0200083	0.0279735	0.0181063	-0.00968258	-0.0254389	0.0239233	-0.0205437	0.0115877
HT4-D5	-0.160988	0.197442	-0.0520777	-0.158304	-0.334177	0.0331873	-0.0966672	0.040997	0.00800993	-0.0976464	0.086132	-0.085984	0.00120041	-0.0693449	0.0669765	-0.00393626	-0.0146872	-0.0289583	0.0145074	0.0551676	0.0275904	-0.0461482	0.0287307	-0.000729373	-0.00808008	-0.0116397	0.0113219	0.0277882	0.00745663	0.0260344	-0.000504844	-0.00239339	0.00137723	-0.00405937	-0.000135558	-0.00220403	0.00200491	-0.0091213	0.0293679	0.00332715	0.0138147	0.000730193	0.00600621	0.00489834	0.00989956	-0.00183999	-0.00797793	-0.0166676	0.00871234
HT7-D3	-0.0722522	0.0945845	0.0681095	0.04086	0.0568114	-0.0706031	0.018223	-0.00223968	-0.0919647	-0.0438461	0.00224016	-0.012468	-0.0210801	0.0196317	0.0357372	0.0686391	0.0260385	0.0140979	0.000838515	0.0172499	-0.0317754	-0.00530426	-0.0148223	-0.0211572	0.00185684	-0.0313288	0.00363251	0.0221668	0.0528911	-0.0207852	-0.0638487	-0.0061175	0.0265429	0.00484913	0.0102803	0.0138397	-0.0150484	0.00607158	0.00690196	0.0118106	-0.00466193	0.00168831	-0.0107443	-0.00796573	-0.0354263	-0.0190109	0.00316895	-0.0137296	-0.014321
HT12-D3	-0.137693	0.102043	0.0736241	0.100338	0.055846	0.0559967	0.0638143	-0.0802422	0.114057	0.0174845	-0.0451298	-0.0787482	0.0244814	0.0552779	-0.0089135	0.083642	0.0466639	-0.000377897	-0.0317496	-0.011033	-0.0107586	-0.00738544	0.0136111	-0.00110007	0.0358748	-0.019466	-0.0261105	-0.0199512	-0.0162046	-0.00829065	0.00479668	-0.00631786	0.00939678	0.00808074	-0.0230927	0.00388156	0.0146772	-0.0141723	0.0294033	-0.00517095	-0.00284519	-0.00493846	0.0128976	0.0052854	-0.00798922	-0.00864226	0.00941958	-0.00501585	-0.00101383
HT15-D5	-0.123322	0.0206896	0.0457609	0.103518	-0.130136	-0.0730521	0.0580851	0.0101902	0.0104289	0.0573892	0.0370888	-0.0362715	0.0648489	0.0334718	-0.0178146	-0.00058749	-0.0180811	0.0394092	0.00342923	-0.0188047	-0.0116533	0.0460823	0.013143	-0.040631	0.00056839	0.0188343	0.0119869	-0.0602053	0.00811071	0.000375009	-0.0268493	0.0488281	0.02719	-0.0140241	0.010138	-0.00500475	0.0200824	-0.0099761	-0.0179674	0.00549726	-0.0174789	0.00983156	-0.00610703	0.0108845	0.001815	-0.00640147	0.0030263	0.00314661	0.0192681
HT11-D7	0.00234659	0.000130745	0.170452	0.0262466	-0.0749963	0.0952538	0.13507	0.112989	0.022517	-0.0597212	0.053683	-0.014121	0.00563851	-0.0650139	-0.0261184	0.0171589	0.0230449	0.0324866	0.0150889	-0.0350303	0.0277485	-0.030857	-0.0180509	0.0442655	0.00524968	0.0164227	0.00102046	-0.00689162	-0.0375662	0.00334697	-0.0117944	-0.0228631	-0.0064999	-0.00622575	0.00961502	0.0351734	-0.00874566	0.0105573	-0.00238971	-0.0198294	0.00386376	1.63142e-06	0.00138129	0.00441266	0.00739383	-0.00807359	-0.0105234	-0.00735725	0.0103565
HC4-H0	0.026048	-0.0306805	0.118358	0.0418012	-0.0427272	0.0601318	0.00724208	0.0586001	0.103228	0.0438447	-0.0324335	-0.0204766	-0.0445284	-0.0202774	-0.00461557	0.0431044	-0.00510992	-0.0564843	0.0333447	-0.0372404	-0.0158799	0.0587983	-0.0316311	0.0345238	-0.0205809	-0.023914	0.00913231	0.00691427	0.0128368	-0.0397956	0.00610179	0.0360487	-0.00262457	0.0179309	-0.00942354	-0.00571351	0.00233952	-0.0395114	-0.00165233	0.00428539	0.004847	-0.00787701	-0.00948174	4.61737e-05	0.0302101	-0.0168381	-0.0147542	0.000794931	-0.0161572
HT12-D5	-0.213283	0.0699077	0.121115	0.173579	-0.0611658	-0.00985174	-0.0268658	0.0539567	0.0218565	0.00477296	0.0574495	0.072196	-0.0856202	0.0428827	0.05276	-0.0656184	-0.0408563	0.00395243	0.0501926	0.0326462	0.0262162	-0.0427935	-0.0301414	-0.0254113	-0.00524288	-0.0350574	-0.0118872	0.011288	-0.035817	0.021143	-0.00263134	0.00518827	0.0328783	0.0171644	-0.00261227	0.00660884	0.011555	0.00146395	-0.00216163	-0.0120245	-0.0169241	0.00318138	-0.023455	0.0152525	-0.00441547	-0.00909211	0.00849432	-0.00225139	0.00627763
HT6-D5	-0.16954	0.0297222	0.096139	0.0291816	0.0867936	0.00550866	0.14241	0.0762077	0.0373495	8.48748e-05	-0.0104842	0.0881281	-0.0119661	-0.00465601	-0.0211668	-0.0762478	0.0199562	0.0318688	0.021449	0.0285832	-0.00808309	-0.0341931	0.056358	-0.0122218	-0.00266647	0.00377318	0.0369692	0.0100311	-0.0238907	-0.0301333	0.0380899	-0.00752543	-0.00561089	-0.0262107	0.0336037	-0.0183101	-0.0130415	-0.0341326	-0.00619006	0.000111294	0.0213346	-0.0372554	0.0206985	-0.002697	-0.0123929	0.00705291	0.00626186	-0.00456798	0.00323182
P8	-0.0292535	0.113454	0.131309	-0.0160127	0.0870373	0.0759037	0.148538	-0.0135417	-0.101958	-0.113359	-0.0281517	-0.0316512	0.00127116	-0.0285743	0.045989	-0.00280309	-0.00692802	0.0113968	0.0312798	-0.013589	0.0249783	0.0338917	-0.0170059	0.0103181	-0.0425263	-0.00355894	-0.030913	0.00144154	-0.0278942	0.0494121	-0.0175203	-0.00349845	-0.0145482	0.0144239	0.00548028	-0.0252404	0.0161487	-0.011224	0.0358546	-0.000504537	0.00402214	0.00952247	-0.0080625	0.011247	-0.0104441	-0.0104708	0.0155191	0.00789241	0.00728747
HT10-D5	-0.136141	0.100299	0.0983542	0.0539685	0.0332971	-0.0553797	0.0337826	0.00429309	-0.0557489	-0.00162752	0.0236554	-0.0675906	0.0222655	-0.0675794	-0.0331107	0.011947	0.0360706	0.0227722	-0.0251394	0.00840029	-0.0412324	-0.0358562	-0.0105159	-0.0067636	-0.0255094	0.0148363	0.00321602	-0.0239053	-0.0170061	-0.0152258	-0.00253389	-0.00745907	0.00267111	0.00147392	-0.02282	-0.0458578	-0.00504672	0.00365994	-0.00085611	0.0214432	0.00106348	-0.0197421	0.0146758	-0.0103758	-0.000300921	0.0157349	-0.019237	-0.00521717	0.00144277
HT1-D7	-0.118195	-0.147177	0.141713	0.0101672	-0.00368354	0.0782305	-0.0518313	0.0205919	-0.107908	0.0669492	0.0283441	-0.0385051	0.0207123	0.025809	0.00648283	0.0229937	0.0172005	0.0280631	-0.0153448	0.0254615	0.0593914	0.00657522	0.011842	0.0019598	0.0405457	-0.0131515	0.00999609	-0.0147383	0.00669314	0.0298628	-0.0206992	0.0221502	-0.0134858	0.00576444	-0.0525871	-0.0377007	-0.00386402	-0.00742676	0.0119293	-0.0190745	-0.038856	-0.00257935	0.0146081	0.00484782	0.00687089	-0.0109007	-0.0181669	0.012153	0.00203902
HC4-D3	-0.0463491	-0.0223233	0.18679	-0.0636566	0.111071	0.0261907	-0.148341	-0.00542857	0.0172341	-0.0143218	-0.047611	0.00526066	-0.0540282	0.0385193	0.00951468	-0.00938166	0.0554721	0.0197374	-0.0620609	0.0225058	-0.0333813	-0.0357676	-0.0340372	0.0122366	0.00107559	0.0322048	-0.0190958	-0.0032474	-0.00934019	-0.033332	-0.0205284	-0.000614542	-0.0112495	-0.0128559	0.0061888	-0.000690589	-0.0104936	0.0112367	0.00173943	-0.0142419	-0.0098998	0.0199165	0.0177248	-0.0171948	0.00361255	-0.00710187	-0.00630325	-0.0136631	0.00225203
HT14-D5	-0.223796	-0.103531	0.170153	-0.0613289	-0.114325	-0.101894	-0.0130221	-0.0140174	-0.0820373	-0.0335695	-0.0934232	0.0546227	0.0443136	0.0088235	0.0689319	0.0892757	0.0145239	0.00475064	0.0325411	-0.0326624	0.0292766	-0.00199472	0.00553279	-0.00302117	-0.0373793	-0.00820315	-0.00800333	0.0173713	-0.0255783	-0.0099805	0.0290793	-0.0186746	-0.0220122	0.011442	0.00689949	-0.000532462	0.0100015	-0.00193852	-0.0266417	-0.0218724	0.0127334	0.0142271	-0.00520282	-0.0174587	-0.0175856	0.0127836	-0.00166344	0.00287771	-0.0106297
HT13-D5	-0.204191	-0.151044	0.120577	-0.110473	-0.0565237	0.0139136	0.129707	-0.0841132	-0.08642	-0.0813913	0.02135	-0.0207292	-0.0398782	0.0362039	-0.0331944	0.00328448	0.00654259	-0.0734425	-0.0240562	-0.0384752	-0.00635667	-0.0301697	-0.0144649	0.0161383	0.0262318	-0.0237001	0.0228222	0.029972	5.46056e-05	-0.0181709	0.0192087	-0.0238491	-0.0261919	-0.0343088	-0.00637075	-0.00397261	0.00674	-0.002518	-0.0014428	-0.0033229	0.0189002	-0.0126024	-0.0103645	-0.0132417	-0.0016507	-0.00352912	0.00633012	0.011586	0.0103689
HT1-D3	-0.0862348	0.10409	0.0482701	0.111817	-0.000253895	0.0569114	0.00794235	-0.152958	5.12981e-06	-0.0499023	0.00610723	-0.00186638	0.0329155	0.0348685	-0.0723026	-0.00521489	-0.0407125	0.0244135	0.00373869	-0.0121351	-0.0225739	0.0160489	-0.0403886	-0.0215335	0.0122341	-0.00477074	0.0110708	-0.0293514	-0.0094102	-0.00507461	0.0106467	-0.000115588	-0.00235293	-0.0515349	-0.00255534	-0.0119361	8.20357e-05	-0.00956367	-0.000973576	-0.00654051	0.000108056	0.00136433	-0.0195524	-0.0103443	0.0231242	0.0128704	-0.0134938	0.00703572	-0.0148684
HT6-D7	-0.0674211	-0.0225539	0.157122	0.115335	-0.0950297	0.103875	0.0130586	0.0531135	0.00370132	0.0614317	0.0318993	-0.00869341	0.00298379	0.0465613	-0.0267988	0.00428062	-0.0377398	-0.0102386	0.0481365	0.00449524	-0.0166076	-0.0186045	0.0013699	-0.0350435	-0.0122976	-0.0122714	-0.0798867	0.0131833	-0.00977187	0.0200669	0.0413494	0.000786367	-0.0211553	0.0235356	-0.0071199	-0.0052307	-0.0186814	0.0301551	-0.0100582	-0.00136405	0.0119741	0.00079525	0.00752154	0.00271562	0.0103293	-0.00327673	0.0233843	-0.00245088	0.00734121
HT13-D7	-0.25823	-0.0304073	0.0597994	-0.0424125	0.0418239	-0.0511445	-0.0813115	-0.0670762	0.0411002	-0.00120551	0.0486917	-0.0431255	0.00398413	-0.0384514	-0.118821	-0.0461357	-0.0439736	0.0577988	-0.0166194	-0.0399331	0.00591005	0.0231575	0.0407442	0.0348513	-0.0107545	-0.0201992	-0.0101156	-0.0356838	0.010807	0.00274166	0.00801871	0.0227397	-0.0094324	-0.00679197	0.00725523	0.00751253	0.00296627	0.00431122	0.0115735	0.00135857	-0.0093091	0.0181295	-0.00583832	-0.000992184	-0.00963705	-0.0171889	0.0025861	-0.00139665	-0.0144224
HT8-H0	0.101905	0.0457715	0.106902	0.0168686	-0.0291582	0.0318008	-0.00358958	-0.051039	-0.00108628	0.0124602	-0.0101559	0.0167702	0.00459139	0.0271901	0.0075701	-0.0382109	0.0455195	0.0412963	-0.012772	-0.0157897	0.0278806	-0.000768461	0.0539551	0.05056	0.00555976	-0.0156968	-0.0288264	0.00484365	0.00762224	0.00479583	-0.00875714	0.000728607	0.00121882	-0.0486643	-0.0269279	0.00661192	0.00695157	-0.00957559	-0.00554852	-0.0120831	-0.00016137	0.00156203	-0.0022612	0.0316176	-0.0030128	0.019581	-0.0192202	-0.00889148	0.00212749
HT10-D3	-0.186508	0.130582	0.00989012	0.0356887	0.0359121	-0.0366047	-0.0250038	-0.0605875	0.0455697	0.11049	-0.0139257	-0.0364388	-0.136296	0.0709701	0.0523484	-0.0472688	-0.00505636	-0.0341856	0.0163412	-0.0357723	-0.0172074	-0.0121737	-0.00253152	0.0106923	-0.0160396	0.0378519	0.0156845	0.0212489	-0.0105577	0.0150682	-0.0459609	0.0160719	-0.0424556	-0.0130723	0.00839975	0.0171692	-0.0102344	0.0171403	-0.0194519	-0.00331389	-0.00160946	0.0199768	0.0188601	0.0256001	0.00313782	-0.00206499	-0.016937	-0.0119449	-0.00726843
HT13-D3	-0.366026	0.154712	-0.00923331	-0.207195	0.00115628	-0.058978	-0.134056	-0.00305752	0.00796178	-0.00691195	-0.00543284	-0.0477014	0.0295984	0.0604286	-0.110851	-0.0161026	0.0532443	0.0377769	0.0411065	0.0251769	-0.000152252	0.0126806	-0.014229	-0.0213275	0.0184394	0.0218836	-0.00461877	0.0244097	-0.00798128	0.000716092	0.0176105	-0.00931929	-0.00462993	0.0271786	-0.0172632	0.0357521	0.0141854	0.00222584	-0.0104886	-0.0107447	0.0119468	-0.0105115	-0.0216782	0.0155006	0.00287285	-0.0125136	-0.00503329	-0.0141138	0.0284818
HT5-D5	-0.380581	0.0571945	-0.0796372	-0.370453	-0.157982	0.16571	0.140682	-0.135759	0.0395406	0.0692565	-0.0264676	0.166021	0.043872	-0.0334384	0.0154933	-0.0659502	-0.0502055	-0.0211794	-0.0314227	0.0313946	-0.0126236	0.0094731	-0.0217276	0.0275296	0.00769544	-0.00128527	-0.032672	-0.0225268	0.00169814	-0.002561	-0.023986	0.0024321	0.00942913	0.0155455	-0.00488549	-0.00388166	-0.0104989	0.0107685	-0.0110467	0.0129902	-0.0113127	0.00859215	-0.00564575	-0.00688507	-0.00308342	0.00354008	-0.00725708	0.00993606	-0.00609496
HT9-D7	-0.189998	0.196489	0.0347265	-0.0754409	0.0508827	-0.0704236	-0.014216	0.0978072	-0.0875558	0.0746448	-0.0820047	0.00786234	-0.0227139	-0.0447502	-0.0306048	0.0380815	0.053536	0.0119522	0.0151604	-0.0364362	0.0134377	-0.00981059	-0.00769054	-0.00765951	-0.0247796	0.00475945	0.039061	-0.00648189	0.030186	0.00795459	0.0149738	-0.0212394	0.00239454	-0.0566995	0.00260766	-0.004731	-0.00159761	-0.0106275	9.13951e-05	0.00646851	-0.031423	0.00691264	0.012049	0.00329455	-0.00602319	-0.000870225	0.0255412	0.0189038	-0.00710294
HT14-D3	-0.0876955	0.196627	-0.00391866	-0.0483915	0.0391753	0.15134	-0.0691524	0.20814	0.0890382	0.00335874	-0.0791412	0.0332487	0.0352124	0.0755251	-0.06452	0.0593207	-0.039422	-0.0871376	-0.00423273	-0.0428592	0.0331833	0.0295211	0.0456686	-0.0384582	0.0390657	0.0390516	0.0103535	0.00916771	-0.0133266	0.00981051	-0.0176268	0.00302561	0.00643144	-0.013629	-0.024733	-0.0222246	0.00778113	0.0219175	-0.00455095	0.00641432	0.0112873	0.0175288	0.0100666	0.00159665	-0.0229632	0.00778756	0.00955594	0.00550018	-0.000982024
Biplot	0	0
Site constraints	0	0
[truncated: 76 more columns]

## Sheet: Weighted_unifrac_DM
	HC1-D5	HC10-D5	HC11-D5	HC12-D3	HC12-D5	HC12-H0	HC13-D7	HC14-D3	HC14-H0	HC2-D7	HC3-D5	HC5-D3	HC5-D5	HC6-D3	HC6-D5	HC7-D5	HC7-D7	HC7-H0	HC8-D7	HC8-H0	HC9-D5	HT2-D3	HT2-D5	HT3-D7	HT5-D7	HT6-D3	HT7-D5	HT7-D7	HT7-H0	HT8-D3	HT8-D5	HT8-D7	HT9-D3	P10	P3	HC12-D7	HC13-D3	HC3-D7	HC6-D7	HC8-D5	HT12-D7	HT12-H0	HT14-D7	HT6-H0	HT9-D5	P1	P6	HC14-D5	HC15-D3
HC1-D5	0	0.188244	0.0798453	0.295045	0.0671883	0.391929	0.182172	0.104282	0.139373	0.212252	0.0767996	0.0868843	0.147258	0.259782	0.0824723	0.179415	0.200371	0.205879	0.10865	0.0831144	0.152951	0.481291	0.492917	0.273841	0.240504	0.473325	0.393428	0.496765	0.13838	0.427564	0.482009	0.287821	0.479121	0.16231	0.0779144	0.126077	0.138357	0.107958	0.130605	0.0725542	0.321636	0.144667	0.203923	0.167591	0.330512	0.160551	0.062193	0.103199	0.0794944
HC10-D5	0.188244	0	0.206592	0.338805	0.22367	0.385605	0.17679	0.261012	0.277749	0.292085	0.220164	0.239312	0.230644	0.340107	0.222987	0.252963	0.169338	0.208916	0.250519	0.207692	0.246756	0.551982	0.557132	0.352979	0.296879	0.544893	0.468829	0.532741	0.223698	0.500787	0.556863	0.365543	0.550777	0.175685	0.214539	0.220512	0.283421	0.223108	0.234864	0.238877	0.37111	0.194785	0.345072	0.130149	0.403802	0.275089	0.197359	0.227424	0.246354
HC11-D5	0.0798453	0.206592	0	0.344207	0.122709	0.340266	0.21771	0.0651168	0.0935777	0.263928	0.111801	0.0478304	0.100147	0.302858	0.0988943	0.231542	0.153948	0.236548	0.158723	0.0613994	0.212432	0.535355	0.538577	0.330241	0.295341	0.527174	0.448286	0.53335	0.191059	0.481764	0.536591	0.343295	0.533745	0.199753	0.110879	0.182844	0.130566	0.145278	0.131565	0.104899	0.36144	0.195626	0.189731	0.19822	0.387233	0.201404	0.0945084	0.1602	0.0752316
HC12-D3	0.295045	0.338805	0.344207	0	0.243916	0.601242	0.253865	0.362506	0.394475	0.112339	0.267857	0.336698	0.395467	0.15684	0.305112	0.139378	0.431956	0.32658	0.237319	0.324335	0.176183	0.292294	0.238978	0.115061	0.166877	0.311624	0.136911	0.233218	0.175427	0.168816	0.226163	0.133729	0.287061	0.242053	0.2778	0.179354	0.356783	0.229535	0.387276	0.282028	0.192255	0.172296	0.463474	0.317334	0.0965118	0.299497	0.271334	0.233418	0.351006
HC12-D5	0.0671883	0.22367	0.122709	0.243916	0	0.41046	0.190012	0.134973	0.170387	0.172662	0.0659312	0.111943	0.183522	0.194474	0.0844515	0.159215	0.235401	0.15155	0.0509384	0.11661	0.116163	0.465175	0.436835	0.228773	0.236053	0.484666	0.348492	0.442177	0.141836	0.38307	0.437678	0.261923	0.459742	0.149932	0.0680746	0.104912	0.13549	0.0665625	0.15602	0.0641071	0.335862	0.133929	0.252305	0.177205	0.286478	0.122292	0.0684095	0.0938857	0.118529
HC12-H0	0.391929	0.385605	0.340266	0.601242	0.41046	0	0.434383	0.313469	0.305397	0.553096	0.403263	0.325336	0.26725	0.554013	0.382048	0.518187	0.243226	0.300098	0.422381	0.335599	0.480599	0.795387	0.78954	0.592689	0.563515	0.787011	0.70876	0.793041	0.476327	0.742382	0.796726	0.605105	0.793797	0.512744	0.413508	0.468794	0.34534	0.408456	0.388383	0.391466	0.620624	0.455557	0.384756	0.318494	0.649335	0.474518	0.36731	0.439512	0.331377
HC13-D7	0.182172	0.17679	0.21771	0.253865	0.190012	0.434383	0	0.22978	0.243196	0.227919	0.165995	0.230256	0.24084	0.231705	0.196187	0.158268	0.287189	0.23603	0.185722	0.176133	0.130548	0.42455	0.459374	0.224209	0.209455	0.416048	0.343164	0.448235	0.115653	0.386677	0.44991	0.233427	0.423283	0.217437	0.17577	0.120341	0.253832	0.148442	0.282817	0.182141	0.234743	0.107103	0.292761	0.133675	0.291783	0.209473	0.166847	0.126292	0.211202
HC14-D3	0.104282	0.261012	0.0651168	0.362506	0.134973	0.313469	0.22978	0	0.0476605	0.291063	0.127597	0.0500289	0.0925533	0.308837	0.102268	0.255716	0.175661	0.248513	0.161059	0.0759079	0.210193	0.540902	0.54371	0.330751	0.303156	0.533663	0.451806	0.549178	0.208163	0.487246	0.54142	0.346669	0.538591	0.249057	0.124791	0.192468	0.085183	0.161789	0.162717	0.112401	0.369738	0.223377	0.167372	0.215849	0.394698	0.204396	0.104644	0.165387	0.0441262
HC14-H0	0.139373	0.277749	0.0935777	0.394475	0.170387	0.305397	0.243196	0.0476605	0	0.327863	0.168841	0.0790576	0.0871782	0.344779	0.14034	0.286455	0.178952	0.290985	0.202256	0.100027	0.248628	0.574922	0.574019	0.364548	0.34614	0.566432	0.48608	0.5786	0.235555	0.521682	0.578043	0.381046	0.573315	0.285005	0.147859	0.22577	0.111538	0.201696	0.171523	0.155083	0.400067	0.253164	0.173119	0.232995	0.438368	0.231879	0.137694	0.207046	0.0846849
HC2-D7	0.212252	0.292085	0.263928	0.112339	0.172662	0.553096	0.227919	0.291063	0.327863	0	0.197766	0.266028	0.333755	0.0886644	0.235496	0.0765864	0.375913	0.27278	0.171493	0.272039	0.114368	0.36936	0.296052	0.136477	0.155922	0.389106	0.199226	0.295515	0.117478	0.230714	0.280369	0.170058	0.363543	0.155529	0.203097	0.117201	0.284776	0.178251	0.304226	0.207869	0.240839	0.126672	0.39864	0.282993	0.152137	0.234394	0.221774	0.17335	0.277312
HC3-D5	0.0767996	0.220164	0.111801	0.267857	0.0659312	0.403263	0.165995	0.127597	0.168841	0.197766	0	0.119228	0.193775	0.210732	0.0570732	0.159013	0.246785	0.1527	0.0726474	0.100629	0.11117	0.433332	0.440049	0.227233	0.193111	0.44571	0.344417	0.437933	0.127802	0.379102	0.434728	0.240227	0.431762	0.15281	0.0748288	0.104854	0.123743	0.0499203	0.170892	0.0304989	0.295438	0.133211	0.223059	0.157247	0.282634	0.128895	0.0720204	0.0620904	0.105618
HC5-D3	0.0868843	0.239312	0.0478304	0.336698	0.111943	0.325336	0.230256	0.0500289	0.0790576	0.266028	0.119228	0	0.0895975	0.295271	0.100812	0.233694	0.142819	0.229533	0.144853	0.0737311	0.208745	0.537676	0.535997	0.329433	0.299052	0.533201	0.44964	0.540117	0.191251	0.484443	0.539137	0.344294	0.536363	0.220564	0.108928	0.182429	0.101872	0.140885	0.128392	0.104668	0.381256	0.190086	0.196374	0.212591	0.388987	0.194463	0.0838138	0.156394	0.071127
HC5-D5	0.147258	0.230644	0.100147	0.395467	0.183522	0.26725	0.24084	0.0925533	0.0871782	0.333755	0.193775	0.0895975	0	0.362703	0.168276	0.302857	0.107191	0.251102	0.206702	0.127829	0.277254	0.606744	0.600246	0.399506	0.366593	0.598306	0.519967	0.608313	0.260244	0.553647	0.608274	0.414542	0.605424	0.276909	0.186811	0.251565	0.133423	0.200122	0.150193	0.181765	0.430921	0.235284	0.228525	0.215192	0.457557	0.272751	0.144221	0.22882	0.107122
HC6-D3	0.259782	0.340107	0.302858	0.15684	0.194474	0.554013	0.231705	0.308837	0.344779	0.0886644	0.210732	0.295271	0.362703	0	0.235404	0.1395	0.402451	0.282609	0.170027	0.292574	0.117754	0.389725	0.250853	0.152604	0.175485	0.409224	0.204838	0.257933	0.14454	0.19815	0.254597	0.186306	0.384255	0.203824	0.227326	0.144383	0.276951	0.185238	0.332991	0.219789	0.262811	0.159769	0.416503	0.305997	0.182894	0.232516	0.239754	0.180774	0.294648
HC6-D5	0.0824723	0.222987	0.0988943	0.305112	0.0844515	0.382048	0.196187	0.102268	0.14034	0.235496	0.0570732	0.100812	0.168276	0.235404	0	0.200926	0.222688	0.191681	0.0933553	0.0981757	0.137954	0.468159	0.456972	0.259423	0.216135	0.480145	0.379651	0.45109	0.159582	0.413161	0.468807	0.275131	0.466086	0.170798	0.0816465	0.136248	0.0908743	0.0974887	0.169812	0.0629878	0.332001	0.164697	0.222709	0.193961	0.326122	0.140618	0.0607545	0.105454	0.0907187
HC7-D5	0.179415	0.252963	0.231542	0.139378	0.159215	0.518187	0.158268	0.255716	0.286455	0.0765864	0.159013	0.233694	0.302857	0.1395	0.200926	0	0.340592	0.262844	0.175626	0.229989	0.0803333	0.335484	0.342964	0.121859	0.12129	0.354606	0.235731	0.330207	0.0609233	0.271304	0.331475	0.135461	0.330599	0.128204	0.151348	0.0691895	0.251335	0.150096	0.275588	0.172521	0.186792	0.0817017	0.357841	0.229429	0.176412	0.19593	0.18589	0.124021	0.244215
HC7-D7	0.200371	0.169338	0.153948	0.431956	0.235401	0.243226	0.287189	0.175661	0.178952	0.375913	0.246785	0.142819	0.107191	0.402451	0.222688	0.340592	0	0.197675	0.261963	0.189443	0.321208	0.647359	0.63808	0.440687	0.409113	0.639528	0.5605	0.643813	0.301439	0.594144	0.649005	0.455545	0.645975	0.281682	0.234102	0.295134	0.219952	0.25135	0.160178	0.235374	0.478717	0.275722	0.316639	0.171694	0.50011	0.318135	0.193561	0.279473	0.192625
HC7-H0	0.205879	0.208916	0.236548	0.32658	0.15155	0.300098	0.23603	0.248513	0.290985	0.27278	0.1527	0.229533	0.251102	0.282609	0.191681	0.262844	0.197675	0	0.143834	0.211456	0.207105	0.532825	0.516356	0.306342	0.312795	0.552407	0.420097	0.520548	0.251069	0.453612	0.507183	0.335502	0.527822	0.265565	0.192609	0.217928	0.252837	0.13324	0.292787	0.148368	0.403868	0.211995	0.335288	0.11758	0.356276	0.222568	0.173265	0.190155	0.228306
HC8-D7	0.10865	0.250519	0.158723	0.237319	0.0509384	0.422381	0.185722	0.161059	0.202256	0.171493	0.0726474	0.144853	0.206702	0.170027	0.0933553	0.175626	0.261963	0.143834	0	0.141824	0.107844	0.449846	0.401117	0.212306	0.22073	0.469755	0.318216	0.4176	0.158268	0.351187	0.405511	0.249177	0.444705	0.175206	0.110606	0.120672	0.137194	0.065867	0.192743	0.0712854	0.321007	0.143892	0.263559	0.192983	0.25645	0.136021	0.100348	0.0873165	0.139109
HC8-H0	0.0831144	0.207692	0.0613994	0.324335	0.11661	0.335599	0.176133	0.0759079	0.100027	0.272039	0.100629	0.0737311	0.127829	0.292574	0.0981757	0.229989	0.189443	0.211456	0.141824	0	0.193567	0.514539	0.537371	0.310921	0.281953	0.506239	0.428479	0.53328	0.186618	0.461962	0.517299	0.323398	0.513468	0.227025	0.12126	0.174467	0.149001	0.120047	0.180162	0.0849628	0.338683	0.185602	0.154524	0.161585	0.365543	0.192459	0.0836305	0.139196	0.0701526
HC9-D5	0.152951	0.246756	0.212432	0.176183	0.116163	0.480599	0.130548	0.210193	0.248628	0.114368	0.11117	0.208745	0.277254	0.117754	0.137954	0.0803333	0.321208	0.207105	0.107844	0.193567	0	0.354639	0.349914	0.125584	0.13151	0.374085	0.244918	0.355506	0.0592431	0.278761	0.334432	0.151316	0.348792	0.149107	0.140042	0.0373925	0.189383	0.0953316	0.252206	0.122156	0.226353	0.0690402	0.311711	0.208305	0.191644	0.147835	0.147813	0.0746049	0.191299
HT2-D3	0.481291	0.551982	0.535355	0.292294	0.465175	0.795387	0.42455	0.540902	0.574922	0.36936	0.433332	0.537676	0.606744	0.389725	0.468159	0.335484	0.647359	0.532825	0.449846	0.514539	0.354639	0	0.300769	0.245906	0.286232	0.0215805	0.18708	0.265711	0.34953	0.197366	0.204812	0.205493	0.010021	0.431366	0.457303	0.364994	0.519095	0.431978	0.579332	0.441758	0.274112	0.37477	0.587257	0.50926	0.219442	0.469428	0.475109	0.386363	0.521276
HT2-D5	0.492917	0.557132	0.538577	0.238978	0.436835	0.78954	0.459374	0.54371	0.574019	0.296052	0.440049	0.535997	0.600246	0.250853	0.456972	0.342964	0.63808	0.516356	0.401117	0.537371	0.349914	0.300769	0	0.25804	0.315305	0.319642	0.16631	0.104654	0.381455	0.12631	0.153138	0.256882	0.295575	0.424666	0.45563	0.381323	0.497712	0.429741	0.569772	0.456525	0.316342	0.396845	0.623883	0.546256	0.201288	0.438273	0.485544	0.410668	0.528357
HT3-D7	0.273841	0.352979	0.330241	0.115061	0.228773	0.592689	0.224209	0.330751	0.364548	0.136477	0.227233	0.329433	0.399506	0.152604	0.259423	0.121859	0.440687	0.306342	0.212306	0.310921	0.125584	0.245906	0.25804	0	0.0900404	0.265276	0.127688	0.280466	0.14255	0.170173	0.239433	0.0501585	0.240284	0.225312	0.250008	0.150479	0.310248	0.212083	0.372392	0.236671	0.1632	0.168521	0.395816	0.308404	0.0903482	0.254537	0.265872	0.178284	0.310916
HT5-D7	0.240504	0.296879	0.295341	0.166877	0.236053	0.563515	0.209455	0.303156	0.34614	0.155922	0.193111	0.299052	0.366593	0.175485	0.216135	0.12129	0.409113	0.312795	0.22073	0.281953	0.13151	0.286232	0.315305	0.0900404	0	0.295635	0.207179	0.317176	0.124768	0.245083	0.305535	0.101352	0.284544	0.183437	0.247874	0.14229	0.277288	0.210114	0.342222	0.214719	0.169122	0.154833	0.363948	0.286028	0.149792	0.268666	0.244736	0.14965	0.280751
HT6-D3	0.473325	0.544893	0.527174	0.311624	0.484666	0.787011	0.416048	0.533663	0.566432	0.389106	0.44571	0.533201	0.598306	0.409224	0.480145	0.354606	0.639528	0.552407	0.469755	0.506239	0.374085	0.0215805	0.319642	0.265276	0.295635	0	0.20596	0.285095	0.351108	0.216652	0.223685	0.224603	0.0285478	0.45056	0.475638	0.383611	0.534447	0.451018	0.57709	0.458204	0.265722	0.393588	0.578703	0.500624	0.238903	0.487953	0.481648	0.395235	0.513343
HT7-D5	0.393428	0.468829	0.448286	0.136911	0.348492	0.70876	0.343164	0.451806	0.48608	0.199226	0.344417	0.44964	0.519967	0.204838	0.379651	0.235731	0.5605	0.420097	0.318216	0.428479	0.244918	0.18708	0.16631	0.127688	0.207179	0.20596	0	0.174514	0.261766	0.0527719	0.120936	0.118439	0.180998	0.340632	0.366376	0.270131	0.430183	0.327399	0.491111	0.353501	0.205507	0.287488	0.50657	0.421786	0.068486	0.366495	0.386503	0.298109	0.433283
HT7-D7	0.496765	0.532741	0.53335	0.233218	0.442177	0.793041	0.448235	0.549178	0.5786	0.295515	0.437933	0.540117	0.608313	0.257933	0.45109	0.330207	0.643813	0.520548	0.4176	0.53328	0.355506	0.265711	0.104654	0.280466	0.317176	0.285095	0.174514	0	0.378207	0.133392	0.131884	0.277328	0.260419	0.411765	0.445385	0.38169	0.510688	0.427462	0.57788	0.459491	0.327216	0.395824	0.647017	0.539817	0.22165	0.43436	0.485874	0.422571	0.533133
HT7-H0	0.13838	0.223698	0.191059	0.175427	0.141836	0.476327	0.115653	0.208163	0.235555	0.117478	0.127802	0.191251	0.260244	0.14454	0.159582	0.0609233	0.301439	0.251069	0.158268	0.186618	0.0592431	0.34953	0.381455	0.14255	0.124768	0.351108	0.261766	0.378207	0	0.300295	0.363481	0.156389	0.348166	0.126779	0.138752	0.0420031	0.215672	0.134271	0.233322	0.144775	0.199836	0.0530785	0.31732	0.180878	0.208784	0.192215	0.138864	0.0853071	0.198556
HT8-D3	0.427564	0.500787	0.481764	0.168816	0.38307	0.742382	0.386677	0.487246	0.521682	0.230714	0.379102	0.484443	0.553647	0.19815	0.413161	0.271304	0.594144	0.453612	0.351187	0.461962	0.278761	0.197366	0.12631	0.170173	0.245083	0.216652	0.0527719	0.133392	0.300295	0	0.0756885	0.164912	0.19161	0.3757	0.402432	0.304255	0.465	0.36198	0.526208	0.388489	0.250197	0.320651	0.539755	0.461818	0.112824	0.400208	0.421555	0.333405	0.467901
HT8-D5	0.482009	0.556863	0.536591	0.226163	0.437678	0.796726	0.44991	0.54142	0.578043	0.280369	0.434728	0.539137	0.608274	0.254597	0.468807	0.331475	0.649005	0.507183	0.405511	0.517299	0.334432	0.204812	0.153138	0.239433	0.305535	0.223685	0.120936	0.131884	0.363481	0.0756885	0	0.234119	0.19878	0.430718	0.459766	0.362152	0.519599	0.416138	0.579283	0.442954	0.310803	0.37891	0.593074	0.523083	0.174518	0.455437	0.47612	0.393037	0.522941
HT8-D7	0.287821	0.365543	0.343295	0.133729	0.261923	0.605105	0.233427	0.346669	0.381046	0.170058	0.240227	0.344294	0.414542	0.186306	0.275131	0.135461	0.455545	0.335502	0.249177	0.323398	0.151316	0.205493	0.256882	0.0501585	0.101352	0.224603	0.118439	0.277328	0.156389	0.164912	0.234119	0	0.199834	0.2382	0.262545	0.164648	0.325087	0.230083	0.386231	0.248657	0.137806	0.183366	0.407445	0.318747	0.079529	0.277612	0.281365	0.193368	0.327842
HT9-D3	0.479121	0.550777	0.533745	0.287061	0.459742	0.793797	0.423283	0.538591	0.573315	0.363543	0.431762	0.536363	0.605424	0.384255	0.466086	0.330599	0.645975	0.527822	0.444705	0.513468	0.348792	0.010021	0.295575	0.240284	0.284544	0.0285478	0.180998	0.260419	0.348166	0.19161	0.19878	0.199834	0	0.427109	0.453642	0.358978	0.516912	0.427139	0.577633	0.440007	0.27289	0.372815	0.585142	0.507966	0.213651	0.463956	0.473415	0.385126	0.519723
P10	0.16231	0.175685	0.199753	0.242053	0.149932	0.512744	0.217437	0.249057	0.285005	0.155529	0.15281	0.220564	0.276909	0.203824	0.170798	0.128204	0.281682	0.265565	0.175206	0.227025	0.149107	0.431366	0.424666	0.225312	0.183437	0.45056	0.340632	0.411765	0.126779	0.3757	0.430718	0.2382	0.427109	0	0.161797	0.12145	0.230249	0.167397	0.185228	0.165895	0.302294	0.12411	0.355089	0.249895	0.278685	0.21937	0.178751	0.160566	0.231266
P3	0.0779144	0.214539	0.110879	0.2778	0.0680746	0.413508	0.17577	0.124791	0.147859	0.203097	0.0748288	0.108928	0.186811	0.227326	0.0816465	0.151348	0.234102	0.192609	0.110606	0.12126	0.140042	0.457303	0.45563	0.250008	0.247874	0.475638	0.366376	0.445385	0.138752	0.402432	0.459766	0.262545	0.453642	0.161797	0	0.113099	0.142525	0.0835807	0.162385	0.0754068	0.3149	0.135473	0.255637	0.175653	0.320236	0.105738	0.0593876	0.106763	0.127088
HC12-D7	0.126077	0.220512	0.182844	0.179354	0.104912	0.468794	0.120341	0.192468	0.22577	0.117201	0.104854	0.182429	0.251565	0.144383	0.136248	0.0691895	0.295134	0.217928	0.120672	0.174467	0.0373925	0.364994	0.381323	0.150479	0.14229	0.383611	0.270131	0.38169	0.0420031	0.304255	0.362152	0.164648	0.358978	0.12145	0.113099	0	0.186877	0.0997351	0.223255	0.115828	0.2351	0.0427719	0.303109	0.183392	0.214179	0.159132	0.121721	0.0669377	0.184138
HC13-D3	0.138357	0.283421	0.130566	0.356783	0.13549	0.34534	0.253832	0.085183	0.111538	0.284776	0.123743	0.101872	0.133423	0.276951	0.0908743	0.251335	0.219952	0.252837	0.137194	0.149001	0.189383	0.519095	0.497712	0.310248	0.277288	0.534447	0.430183	0.510688	0.215672	0.465	0.519599	0.325087	0.516912	0.230249	0.142525	0.186877	0	0.158474	0.172257	0.124044	0.385567	0.217592	0.216559	0.261589	0.374125	0.198154	0.125857	0.151333	0.0899658
HC3-D7	0.107958	0.223108	0.145278	0.229535	0.0665625	0.408456	0.148442	0.161789	0.201696	0.178251	0.0499203	0.140885	0.200122	0.185238	0.0974887	0.150096	0.25135	0.13324	0.065867	0.120047	0.0953316	0.431978	0.429741	0.212083	0.210114	0.451018	0.327399	0.427462	0.134271	0.36198	0.416138	0.230083	0.427139	0.167397	0.0835807	0.0997351	0.158474	0	0.195304	0.060187	0.299191	0.11008	0.256255	0.149501	0.265767	0.117624	0.0795366	0.0698694	0.138396
HC6-D7	0.130605	0.234864	0.131565	0.387276	0.15602	0.388383	0.282817	0.162717	0.171523	0.304226	0.170892	0.128392	0.150193	0.332991	0.169812	0.275588	0.160178	0.292787	0.192743	0.180162	0.252206	0.579332	0.569772	0.372392	0.342222	0.57709	0.491111	0.57788	0.233322	0.526208	0.579283	0.386231	0.577633	0.185228	0.162385	0.223255	0.172257	0.195304	0	0.17195	0.427636	0.236147	0.306365	0.266511	0.430427	0.245297	0.148012	0.20024	0.168275
HC8-D5	0.0725542	0.238877	0.104899	0.282028	0.0641071	0.391466	0.182141	0.112401	0.155083	0.207869	0.0304989	0.104668	0.181765	0.219789	0.0629878	0.172521	0.235374	0.148368	0.0712854	0.0849628	0.122156	0.441758	0.456525	0.236671	0.214719	0.458204	0.353501	0.459491	0.144775	0.388489	0.442954	0.248657	0.440007	0.165895	0.0754068	0.115828	0.124044	0.060187	0.17195	0	0.308934	0.145062	0.203109	0.173768	0.29171	0.129864	0.0674336	0.0744331	0.0911107
HT12-D7	0.321636	0.37111	0.36144	0.192255	0.335862	0.620624	0.234743	0.369738	0.400067	0.240839	0.295438	0.381256	0.430921	0.262811	0.332001	0.186792	0.478717	0.403868	0.321007	0.338683	0.226353	0.274112	0.316342	0.1632	0.169122	0.265722	0.205507	0.327216	0.199836	0.250197	0.310803	0.137806	0.27289	0.302294	0.3149	0.2351	0.385567	0.299191	0.427636	0.308934	0	0.244002	0.419573	0.331571	0.156622	0.275968	0.333396	0.246747	0.349547
HT12-H0	0.144667	0.194785	0.195626	0.172296	0.133929	0.455557	0.107103	0.223377	0.253164	0.126672	0.133211	0.190086	0.235284	0.159769	0.164697	0.0817017	0.275722	0.211995	0.143892	0.185602	0.0690402	0.37477	0.396845	0.168521	0.154833	0.393588	0.287488	0.395824	0.0530785	0.320651	0.37891	0.183366	0.372815	0.12411	0.135473	0.0427719	0.217592	0.11008	0.236147	0.145062	0.244002	0	0.330686	0.169915	0.232777	0.189031	0.122996	0.0945151	0.213669
HT14-D7	0.203923	0.345072	0.189731	0.463474	0.252305	0.384756	0.292761	0.167372	0.173119	0.39864	0.223059	0.196374	0.228525	0.416503	0.222709	0.357841	0.316639	0.335288	0.263559	0.154524	0.311711	0.587257	0.623883	0.395816	0.363948	0.578703	0.50657	0.647017	0.31732	0.539755	0.593074	0.407445	0.585142	0.355089	0.255637	0.303109	0.216559	0.256255	0.306365	0.203109	0.419573	0.330686	0	0.297654	0.44586	0.293308	0.233772	0.2474	0.153875
HT6-H0	0.167591	0.130149	0.19822	0.317334	0.177205	0.318494	0.133675	0.215849	0.232995	0.282993	0.157247	0.212591	0.215192	0.305997	0.193961	0.229429	0.171694	0.11758	0.192983	0.161585	0.208305	0.50926	0.546256	0.308404	0.286028	0.500624	0.421786	0.539817	0.180878	0.461818	0.523083	0.318747	0.507966	0.249895	0.175653	0.183392	0.261589	0.149501	0.266511	0.173768	0.331571	0.169915	0.297654	0	0.365401	0.239322	0.152773	0.164633	0.205392
HT9-D5	0.330512	0.403802	0.387233	0.0965118	0.286478	0.649335	0.291783	0.394698	0.438368	0.152137	0.282634	0.388987	0.457557	0.182894	0.326122	0.176412	0.50011	0.356276	0.25645	0.365543	0.191644	0.219442	0.201288	0.0903482	0.149792	0.238903	0.068486	0.22165	0.208784	0.112824	0.174518	0.079529	0.213651	0.278685	0.320236	0.214179	0.374125	0.265767	0.430427	0.29171	0.156622	0.232777	0.44586	0.365401	0	0.318342	0.333641	0.236649	0.371407
P1	0.160551	0.275089	0.201404	0.299497	0.122292	0.474518	0.209473	0.204396	0.231879	0.234394	0.128895	0.194463	0.272751	0.232516	0.140618	0.19593	0.318135	0.222568	0.136021	0.192459	0.147835	0.469428	0.438273	0.254537	0.268666	0.487953	0.366495	0.43436	0.192215	0.400208	0.455437	0.277612	0.463956	0.21937	0.105738	0.159132	0.198154	0.117624	0.245297	0.129864	0.275968	0.189031	0.293308	0.239322	0.318342	0	0.15088	0.146723	0.194871
P6	0.062193	0.197359	0.0945084	0.271334	0.0684095	0.36731	0.166847	0.104644	0.137694	0.221774	0.0720204	0.0838138	0.144221	0.239754	0.0607545	0.18589	0.193561	0.173265	0.100348	0.0836305	0.147813	0.475109	0.485544	0.265872	0.244736	0.481648	0.386503	0.485874	0.138864	0.421555	0.47612	0.281365	0.473415	0.178751	0.0593876	0.121721	0.125857	0.0795366	0.148012	0.0674336	0.333396	0.122996	0.233772	0.152773	0.333641	0.15088	0	0.102797	0.10082
HC14-D5	0.103199	0.227424	0.1602	0.233418	0.0938857	0.439512	0.126292	0.165387	0.207046	0.17335	0.0620904	0.156394	0.22882	0.180774	0.105454	0.124021	0.279473	0.190155	0.0873165	0.139196	0.0746049	0.386363	0.410668	0.178284	0.14965	0.395235	0.298109	0.422571	0.0853071	0.333405	0.393037	0.193368	0.385126	0.160566	0.106763	0.0669377	0.151333	0.0698694	0.20024	0.0744331	0.246747	0.0945151	0.2474	0.164633	0.236649	0.146723	0.102797	0	0.140089
HC15-D3	0.0794944	0.246354	0.0752316	0.351006	0.118529	0.331377	0.211202	0.0441262	0.0846849	0.277312	0.105618	0.071127	0.107122	0.294648	0.0907187	0.244215	0.192625	0.228306	0.139109	0.0701526	0.191299	0.521276	0.528357	0.310916	0.280751	0.513343	0.433283	0.533133	0.198556	0.467901	0.522941	0.327842	0.519723	0.231266	0.127088	0.184138	0.0899658	0.138396	0.168275	0.0911107	0.349547	0.213669	0.153875	0.205392	0.371407	0.194871	0.10082	0.140089	0
HC2-D5	0.135486	0.280048	0.0919473	0.394824	0.168832	0.30548	0.235709	0.0409322	0.0348711	0.323089	0.155867	0.081267	0.108407	0.332299	0.128047	0.287779	0.197745	0.277901	0.193772	0.0860323	0.233706	0.562484	0.568025	0.353124	0.330486	0.554453	0.47386	0.572131	0.235087	0.509056	0.563373	0.36856	0.560296	0.282124	0.152899	0.22201	0.104665	0.189277	0.186438	0.139939	0.38989	0.251426	0.148922	0.230734	0.422424	0.224547	0.131912	0.191868	0.0756096
HC3-H0	0.0397854	0.199669	0.0801607	0.284185	0.0707861	0.382991	0.170588	0.0992642	0.121041	0.211909	0.0654989	0.0793037	0.1511	0.240945	0.0570468	0.169287	0.201277	0.196312	0.103789	0.0866491	0.14034	0.462883	0.47364	0.255673	0.237121	0.461456	0.375118	0.473699	0.120716	0.409911	0.466544	0.269626	0.461509	0.170361	0.0497044	0.113321	0.12735	0.0944302	0.131799	0.0656355	0.314624	0.13421	0.223679	0.15951	0.326618	0.138645	0.0388338	0.100507	0.094741
HC8-D3	0.0478042	0.215745	0.0830132	0.285307	0.0537023	0.382825	0.19536	0.0938607	0.129679	0.20552	0.0521459	0.0811377	0.158073	0.241122	0.0581792	0.174661	0.211117	0.173061	0.0969533	0.0752998	0.145784	0.469033	0.4821	0.261315	0.237642	0.480977	0.38144	0.480013	0.142086	0.415574	0.469927	0.276051	0.467345	0.161985	0.0551162	0.116359	0.124078	0.0851051	0.147966	0.0364069	0.332225	0.146686	0.206032	0.174258	0.318767	0.138037	0.0402643	0.0963434	0.0802215
HC9-D7	0.12504	0.250652	0.115454	0.333833	0.132398	0.321378	0.201592	0.0847639	0.115229	0.291067	0.135738	0.077121	0.102248	0.290096	0.103362	0.238177	0.170851	0.231378	0.137115	0.115078	0.204984	0.533188	0.515445	0.32761	0.29675	0.534132	0.447553	0.514256	0.207331	0.480065	0.533913	0.342616	0.531617	0.247067	0.128896	0.195551	0.076869	0.137696	0.155727	0.1311	0.363032	0.196441	0.22669	0.215586	0.388817	0.182172	0.0988063	0.163906	0.0813729
HC9-H0	0.19521	0.237782	0.229642	0.196799	0.205695	0.49762	0.120838	0.244816	0.270683	0.142343	0.177382	0.253196	0.301729	0.158721	0.209525	0.107493	0.353266	0.296005	0.20772	0.202144	0.114242	0.349505	0.391863	0.159053	0.116795	0.341461	0.276162	0.384343	0.086963	0.315393	0.3767	0.165661	0.348669	0.172211	0.213904	0.114824	0.266126	0.185602	0.297198	0.195044	0.180275	0.12594	0.312957	0.202906	0.216483	0.247016	0.207844	0.139043	0.227422
HT15-D7	0.133361	0.273586	0.13508	0.376423	0.163807	0.396699	0.190522	0.141	0.155166	0.313651	0.130929	0.150413	0.208296	0.327866	0.143732	0.264915	0.269916	0.250889	0.174449	0.0887053	0.22151	0.495776	0.541229	0.299008	0.272612	0.486442	0.410306	0.561574	0.217684	0.450438	0.512156	0.309609	0.493906	0.269469	0.17282	0.212807	0.202572	0.162871	0.254365	0.112397	0.323932	0.240371	0.106794	0.200509	0.353621	0.215951	0.157475	0.15505	0.121946
HT2-H0	0.223012	0.152704	0.257188	0.347486	0.235261	0.307282	0.16666	0.28118	0.29316	0.326821	0.227999	0.271249	0.273339	0.356992	0.258166	0.258418	0.224679	0.138058	0.255968	0.225141	0.259017	0.544566	0.572301	0.351657	0.33489	0.536321	0.462219	0.558125	0.227801	0.497734	0.559017	0.366064	0.543361	0.292733	0.219348	0.230173	0.320952	0.21825	0.323616	0.238552	0.357856	0.212799	0.353148	0.0744136	0.408112	0.265251	0.212054	0.22454	0.270162
P2	0.190911	0.293305	0.12875	0.464317	0.233127	0.307523	0.302158	0.123094	0.092	0.381284	0.226925	0.133477	0.120999	0.415712	0.206675	0.350635	0.193501	0.355344	0.269627	0.166816	0.327099	0.655954	0.639871	0.444322	0.405932	0.647644	0.56743	0.644757	0.308319	0.603016	0.657604	0.462874	0.654574	0.297187	0.221642	0.300305	0.171981	0.267239	0.178377	0.221373	0.478209	0.316904	0.200763	0.303194	0.506503	0.307403	0.209799	0.2726	0.154758
P7	0.275732	0.351718	0.322988	0.0987829	0.231823	0.604798	0.281017	0.348008	0.377892	0.0756963	0.263483	0.322476	0.387355	0.0857243	0.28737	0.136552	0.427581	0.332735	0.22804	0.337787	0.169671	0.348317	0.229243	0.142484	0.184827	0.368011	0.166014	0.233766	0.171884	0.172943	0.226706	0.153314	0.342665	0.213286	0.253527	0.173437	0.336605	0.24283	0.359313	0.273333	0.227323	0.179695	0.463768	0.33882	0.14185	0.282521	0.277012	0.237396	0.343455
P9	0.134486	0.242089	0.177076	0.219828	0.0815728	0.450793	0.152494	0.182526	0.219914	0.1516	0.079434	0.176002	0.250289	0.157784	0.11641	0.129471	0.292557	0.166646	0.0700052	0.168551	0.079052	0.415721	0.384327	0.175525	0.193461	0.435007	0.294032	0.383362	0.123542	0.328099	0.382397	0.213796	0.41052	0.166805	0.0945314	0.0885486	0.164281	0.0609121	0.22178	0.0904141	0.272616	0.121409	0.28488	0.190111	0.235644	0.108667	0.122403	0.0676871	0.165789
P5	0.198762	0.305724	0.154733	0.455108	0.230351	0.318206	0.295048	0.131807	0.128011	0.390867	0.205523	0.150795	0.170175	0.392759	0.183977	0.360191	0.259113	0.315756	0.240176	0.140396	0.311339	0.61742	0.615878	0.409518	0.358395	0.609514	0.53009	0.612168	0.316516	0.565024	0.619904	0.42519	0.615741	0.316986	0.240058	0.304142	0.164484	0.234712	0.255194	0.194614	0.442293	0.320792	0.107298	0.288694	0.467528	0.29068	0.208018	0.244054	0.134315
HC15-D5	0.332097	0.319903	0.280269	0.557243	0.353417	0.100264	0.377362	0.260974	0.232892	0.502166	0.360086	0.26566	0.205847	0.51643	0.338761	0.466567	0.189922	0.268276	0.380716	0.276804	0.439979	0.763065	0.762948	0.558269	0.531982	0.754527	0.675508	0.76452	0.421405	0.709575	0.764157	0.570405	0.76144	0.45694	0.352436	0.411067	0.304773	0.366217	0.331808	0.348326	0.587498	0.403037	0.326386	0.258414	0.617916	0.435223	0.307064	0.395837	0.288227
HC7-D3	0.0724733	0.227159	0.0592555	0.327158	0.105903	0.336387	0.194023	0.048663	0.086112	0.262553	0.0909852	0.053858	0.116108	0.281956	0.0771962	0.221384	0.173548	0.216032	0.129928	0.0525072	0.181338	0.511431	0.515281	0.303237	0.271504	0.503093	0.422868	0.516494	0.178529	0.458447	0.512681	0.31812	0.509865	0.219095	0.101613	0.168373	0.104305	0.121459	0.155077	0.0781121	0.337306	0.194348	0.168929	0.1879	0.361563	0.174794	0.0808799	0.128176	0.0345098
HT3-D3	0.432758	0.488814	0.476137	0.275585	0.448049	0.736181	0.355191	0.481206	0.506077	0.354992	0.411205	0.496711	0.544725	0.375292	0.443029	0.320376	0.59584	0.520612	0.432928	0.448386	0.336802	0.0796702	0.283942	0.22824	0.258485	0.0695305	0.175436	0.250099	0.314705	0.182811	0.191167	0.190993	0.0792673	0.414424	0.442231	0.346177	0.497284	0.418706	0.540511	0.423199	0.218141	0.357559	0.524343	0.444959	0.207499	0.45878	0.444489	0.357681	0.46149
P4	0.112074	0.275175	0.10545	0.329105	0.10099	0.371738	0.230375	0.0922056	0.117233	0.254791	0.0930581	0.0923104	0.176901	0.24697	0.0731334	0.222082	0.225505	0.19314	0.112236	0.0917965	0.1627	0.483694	0.479164	0.268157	0.271269	0.501773	0.386586	0.488618	0.195833	0.421724	0.478385	0.281632	0.477677	0.218298	0.0815609	0.159685	0.117099	0.110299	0.197367	0.0696075	0.355505	0.194887	0.192908	0.227147	0.339074	0.132788	0.0864718	0.130738	0.101258
HC5-D7	0.0333842	0.182033	0.090689	0.284281	0.0645181	0.405843	0.182362	0.122426	0.157112	0.201951	0.0584679	0.0966049	0.169505	0.250392	0.0756015	0.171657	0.220974	0.199992	0.110483	0.0995701	0.149126	0.474941	0.473415	0.267224	0.226695	0.471754	0.385531	0.471033	0.133561	0.420173	0.475213	0.282283	0.47335	0.144253	0.0712787	0.122759	0.142439	0.0963575	0.142011	0.0718473	0.321053	0.139127	0.222382	0.165881	0.323468	0.147346	0.0698093	0.100239	0.100791
HT15-H0	0.128141	0.268578	0.0963039	0.339626	0.11846	0.358192	0.238127	0.0880781	0.107618	0.273818	0.0969938	0.0818643	0.165424	0.260716	0.0730243	0.232153	0.211754	0.212873	0.13231	0.0956807	0.182177	0.505459	0.485595	0.29261	0.277856	0.523459	0.411733	0.483499	0.20726	0.447021	0.502976	0.306975	0.500177	0.218506	0.0924889	0.177347	0.0970667	0.123864	0.189351	0.0871143	0.37179	0.206603	0.197088	0.238741	0.363267	0.152139	0.101411	0.149395	0.0962171
HT4-D7	0.202181	0.265203	0.243179	0.220629	0.215289	0.509978	0.128652	0.245199	0.268668	0.177796	0.176409	0.262159	0.31285	0.1674	0.210771	0.138547	0.367232	0.295089	0.2044	0.211778	0.114131	0.312236	0.378642	0.122164	0.107994	0.303949	0.238036	0.399231	0.0977313	0.28627	0.347678	0.123905	0.310275	0.213839	0.208469	0.117922	0.262792	0.183172	0.307573	0.188919	0.146315	0.142612	0.295508	0.213155	0.191396	0.236545	0.209308	0.123654	0.225623
HT5-D3	0.463789	0.508425	0.505641	0.306728	0.479069	0.764894	0.357832	0.512289	0.529237	0.383855	0.440567	0.527673	0.575349	0.403574	0.474158	0.349741	0.626849	0.548854	0.464151	0.472925	0.367981	0.0931732	0.316234	0.261527	0.29336	0.0767354	0.209293	0.280006	0.345879	0.215508	0.224735	0.222074	0.0913613	0.444869	0.471493	0.37749	0.528426	0.447219	0.571844	0.452828	0.246394	0.388538	0.529443	0.463935	0.236004	0.487522	0.475509	0.388693	0.492228
HC11-D3	0.160356	0.221144	0.210842	0.174619	0.164721	0.496928	0.140215	0.244611	0.275346	0.124247	0.157223	0.206553	0.273334	0.181524	0.194062	0.0626865	0.310913	0.262969	0.176442	0.211529	0.113886	0.375513	0.384698	0.171682	0.141359	0.383039	0.289115	0.368677	0.074534	0.322939	0.380004	0.185859	0.374658	0.123947	0.156052	0.0903856	0.247895	0.152866	0.252262	0.17403	0.196001	0.0771095	0.349152	0.211476	0.22781	0.187352	0.164942	0.122416	0.232906
HC13-H0	0.189456	0.188438	0.156374	0.385986	0.197181	0.234882	0.268415	0.189483	0.218103	0.328342	0.204292	0.14516	0.170223	0.361654	0.187644	0.292982	0.108967	0.100894	0.223913	0.173336	0.284429	0.59894	0.597938	0.396631	0.368046	0.609765	0.512342	0.594861	0.271266	0.546128	0.600464	0.408894	0.597864	0.288442	0.189848	0.257189	0.216919	0.207939	0.238632	0.192495	0.452439	0.234874	0.307577	0.145871	0.450306	0.271318	0.158831	0.24328	0.193097
HT3-D5	0.363249	0.428201	0.413899	0.136259	0.325837	0.675454	0.303652	0.422073	0.451709	0.210613	0.311874	0.416363	0.487228	0.234389	0.349163	0.188369	0.524115	0.396359	0.303932	0.396682	0.21966	0.239104	0.225023	0.122175	0.18366	0.257667	0.123709	0.237421	0.231976	0.150102	0.175644	0.119019	0.233387	0.308444	0.319402	0.24105	0.400217	0.297006	0.458471	0.323305	0.165928	0.256603	0.480466	0.393401	0.114204	0.321449	0.356894	0.26798	0.403021
HC4-D5	0.115885	0.163767	0.14862	0.268158	0.137224	0.448715	0.0845126	0.187567	0.20085	0.212045	0.130746	0.167206	0.211855	0.248505	0.169815	0.146194	0.268541	0.24918	0.157464	0.1345	0.14998	0.455228	0.483876	0.253154	0.230197	0.446309	0.36711	0.468161	0.117763	0.410962	0.472985	0.263491	0.45436	0.167979	0.122188	0.118586	0.220593	0.13212	0.214084	0.142381	0.256641	0.123552	0.252763	0.138836	0.307269	0.177799	0.134109	0.114236	0.173024
HC1-D3	0.243235	0.262617	0.243182	0.379897	0.279587	0.487417	0.293434	0.257846	0.252796	0.312229	0.296936	0.257217	0.246064	0.348447	0.281699	0.281526	0.268095	0.406048	0.304192	0.287077	0.273985	0.555019	0.549916	0.348938	0.333511	0.547064	0.466281	0.559912	0.246904	0.501344	0.558609	0.361521	0.552761	0.205181	0.266231	0.253421	0.274845	0.31496	0.147906	0.301464	0.387548	0.253434	0.4043	0.332889	0.419731	0.328392	0.269844	0.290153	0.264067
HC15-D7	0.0760492	0.207593	0.0824778	0.304209	0.0723802	0.398972	0.23417	0.124377	0.15908	0.221285	0.0884173	0.0909933	0.154881	0.253971	0.0683976	0.197505	0.206442	0.202424	0.108348	0.110583	0.168748	0.508704	0.477337	0.288914	0.25355	0.527397	0.408422	0.469076	0.18109	0.442109	0.49737	0.305548	0.502961	0.153792	0.0842838	0.145858	0.120333	0.107205	0.137102	0.0880798	0.378542	0.16648	0.246824	0.216797	0.34609	0.161399	0.0775386	0.138068	0.11775
HC9-D3	0.0605033	0.185165	0.0712197	0.321508	0.100918	0.390201	0.212377	0.107009	0.140501	0.238696	0.102559	0.0875764	0.138022	0.275445	0.0680904	0.207988	0.191597	0.237448	0.125818	0.11043	0.178281	0.508364	0.496863	0.300803	0.239795	0.501481	0.420291	0.482831	0.164997	0.455191	0.510897	0.314594	0.506409	0.157217	0.105063	0.153291	0.110943	0.1416	0.125949	0.107958	0.352769	0.17261	0.23548	0.20309	0.360832	0.188625	0.0825948	0.133655	0.0968283
HT2-D7	0.109925	0.240489	0.10754	0.348802	0.139757	0.371845	0.175466	0.0898573	0.108969	0.297561	0.111326	0.1045	0.156646	0.294522	0.0931373	0.242774	0.226588	0.233468	0.145436	0.0722506	0.18642	0.484171	0.50893	0.274453	0.251863	0.475801	0.396305	0.536571	0.19042	0.431448	0.491933	0.290848	0.482883	0.253423	0.130484	0.182912	0.142845	0.142096	0.214468	0.100559	0.310438	0.204591	0.14759	0.177364	0.345162	0.193774	0.102924	0.127889	0.0807901
HC4-D7	0.0929866	0.144953	0.101956	0.313522	0.133361	0.393168	0.135282	0.145164	0.159853	0.258303	0.12998	0.129928	0.153957	0.294805	0.142136	0.19879	0.195398	0.233493	0.172956	0.100636	0.19426	0.514104	0.53318	0.309675	0.284834	0.505583	0.425759	0.521064	0.171081	0.462084	0.517697	0.321538	0.51285	0.194241	0.0969739	0.164682	0.193529	0.129597	0.163268	0.138467	0.322569	0.159178	0.229587	0.135213	0.368068	0.187631	0.0971413	0.142915	0.135547
HC13-D5	0.171295	0.209114	0.219024	0.175299	0.197958	0.52033	0.15927	0.254281	0.285194	0.132347	0.185445	0.233623	0.287154	0.205832	0.219214	0.076052	0.300439	0.300445	0.211918	0.234825	0.128416	0.361349	0.381455	0.161884	0.147281	0.354529	0.272755	0.378435	0.080736	0.308945	0.371606	0.172455	0.359963	0.122841	0.19354	0.106473	0.274343	0.193035	0.245296	0.203113	0.192938	0.104445	0.359666	0.226713	0.211299	0.242158	0.203628	0.144568	0.243354
HC1-H0	0.0906058	0.174384	0.0898716	0.361145	0.140804	0.407102	0.202536	0.116806	0.136589	0.281539	0.137916	0.113655	0.157239	0.326335	0.151603	0.24454	0.181515	0.273031	0.185387	0.113988	0.222467	0.546554	0.565425	0.33783	0.310486	0.538544	0.457854	0.56545	0.203337	0.493557	0.549168	0.352994	0.544775	0.176979	0.135042	0.191437	0.170334	0.171041	0.103655	0.140213	0.371839	0.211305	0.212192	0.199262	0.396376	0.226842	0.123949	0.166726	0.11526
HC3-D3	0.201569	0.269826	0.182136	0.354093	0.234954	0.367078	0.239266	0.164565	0.147128	0.319318	0.256296	0.166888	0.136737	0.35529	0.220018	0.270667	0.213704	0.337943	0.250112	0.198617	0.277268	0.552811	0.535547	0.355351	0.340949	0.544803	0.466818	0.531972	0.253185	0.499791	0.556195	0.36715	0.551561	0.284095	0.217962	0.259989	0.165369	0.264749	0.214285	0.252249	0.362557	0.240446	0.298393	0.271945	0.420262	0.288001	0.202379	0.266641	0.174449
HT11-H0	0.22628	0.342355	0.182683	0.481176	0.256547	0.236159	0.331272	0.158427	0.140398	0.417526	0.27065	0.162885	0.129043	0.44083	0.249296	0.388204	0.217179	0.349174	0.292755	0.186373	0.360558	0.690782	0.676325	0.481405	0.45042	0.682709	0.602227	0.689327	0.345607	0.637063	0.691774	0.496838	0.688798	0.36668	0.260388	0.33365	0.210202	0.281394	0.230845	0.251999	0.516468	0.323358	0.232595	0.313278	0.54041	0.344392	0.219081	0.306392	0.185829
HC6-H0	0.225929	0.300585	0.167006	0.480684	0.263025	0.309684	0.313431	0.152771	0.125751	0.417496	0.273266	0.159698	0.120234	0.439544	0.245659	0.386698	0.183173	0.367169	0.290635	0.185942	0.358563	0.689433	0.679612	0.48068	0.449271	0.681259	0.60078	0.690993	0.343715	0.635751	0.690443	0.495537	0.68744	0.325427	0.259433	0.332497	0.201003	0.283453	0.187782	0.257392	0.514913	0.324988	0.251456	0.314814	0.541019	0.348029	0.217639	0.307657	0.184048
HC11-D7	0.0559101	0.189442	0.0539256	0.340561	0.113351	0.377667	0.197695	0.0906622	0.110729	0.261026	0.113115	0.083682	0.12663	0.304496	0.114945	0.225937	0.18094	0.239117	0.157037	0.0670554	0.20209	0.528247	0.545251	0.320485	0.291086	0.520006	0.440518	0.54568	0.183691	0.475296	0.529925	0.334679	0.526665	0.192453	0.115632	0.172438	0.153103	0.145454	0.132899	0.100171	0.353934	0.189734	0.176378	0.179513	0.378214	0.203401	0.0917275	0.146311	0.0707387
HT3-H0	0.34577	0.329703	0.302125	0.567493	0.366492	0.0915048	0.374137	0.280011	0.252909	0.516585	0.373102	0.288637	0.231821	0.540627	0.36107	0.479464	0.21323	0.274102	0.396367	0.28545	0.458946	0.776585	0.780229	0.574682	0.543518	0.768128	0.689831	0.775998	0.44347	0.723772	0.77823	0.586235	0.775232	0.470145	0.371815	0.434191	0.330622	0.376957	0.361513	0.358807	0.594195	0.425774	0.314665	0.270782	0.626764	0.446587	0.33269	0.410222	0.296579
HC11-H0	0.124633	0.269747	0.0871337	0.403632	0.172904	0.318357	0.245144	0.066961	0.0451667	0.320252	0.171687	0.0795944	0.0924332	0.365383	0.159979	0.287768	0.18001	0.296088	0.214572	0.0967687	0.263267	0.593067	0.598815	0.384638	0.352657	0.584312	0.504573	0.601644	0.245885	0.539418	0.59413	0.399235	0.591397	0.273763	0.167945	0.236679	0.137828	0.204969	0.16932	0.154021	0.415438	0.255106	0.14777	0.241464	0.442784	0.254862	0.151332	0.211051	0.088724
HC1-D7	0.167024	0.306497	0.137772	0.428414	0.198175	0.309351	0.25895	0.0940599	0.0668312	0.351751	0.201927	0.124309	0.107348	0.371779	0.168369	0.316898	0.20916	0.324522	0.229645	0.151168	0.277803	0.600711	0.600923	0.391343	0.375635	0.592603	0.511826	0.607331	0.265372	0.547284	0.606171	0.406837	0.598318	0.309155	0.17608	0.254362	0.12067	0.234736	0.180715	0.192006	0.434729	0.28046	0.211838	0.26344	0.467745	0.268758	0.163413	0.236452	0.114272
HT13-H0	0.228891	0.233257	0.263388	0.161983	0.250657	0.517978	0.125343	0.297291	0.302548	0.152822	0.23854	0.28027	0.300001	0.202983	0.271862	0.114453	0.348237	0.317875	0.262347	0.243168	0.168561	0.332829	0.388675	0.148703	0.156021	0.324469	0.260284	0.380462	0.115484	0.30583	0.370331	0.146639	0.331621	0.208245	0.239856	0.154702	0.329433	0.221491	0.330568	0.255915	0.163192	0.120325	0.37605	0.204489	0.211873	0.294124	0.226143	0.19685	0.286755
HC10-D3	0.108835	0.255614	0.0902286	0.373789	0.143851	0.32102	0.220783	0.0407537	0.0567989	0.299218	0.128196	0.0775185	0.0936899	0.318149	0.111259	0.266266	0.196221	0.256669	0.165087	0.0814258	0.216437	0.547229	0.553235	0.338143	0.30613	0.539241	0.458347	0.558543	0.220917	0.493641	0.54809	0.352948	0.545282	0.256534	0.145851	0.205297	0.074818	0.163008	0.16977	0.11761	0.372653	0.235907	0.158937	0.212794	0.396435	0.21671	0.118286	0.164563	0.04029
HC15-H0	0.216789	0.186187	0.171062	0.468958	0.259642	0.249767	0.290007	0.189154	0.170678	0.405979	0.271526	0.168598	0.122362	0.442996	0.260031	0.364398	0.0802098	0.239347	0.294729	0.18288	0.36465	0.681551	0.675299	0.481708	0.44992	0.673324	0.596401	0.668316	0.3428	0.628442	0.683171	0.492915	0.680221	0.325772	0.249076	0.335739	0.249954	0.275772	0.207575	0.25681	0.488866	0.316223	0.264221	0.196649	0.532218	0.329442	0.226492	0.311283	0.19544
HC14-D7	0.291438	0.26189	0.318886	0.174362	0.31477	0.61932	0.25715	0.373161	0.403829	0.211269	0.29395	0.343316	0.391401	0.275232	0.321996	0.170414	0.392229	0.400751	0.325866	0.336024	0.242754	0.341312	0.358126	0.226345	0.174354	0.333606	0.266047	0.318042	0.196916	0.303776	0.360512	0.217543	0.340467	0.198519	0.298847	0.229593	0.386796	0.294908	0.345999	0.319912	0.181132	0.216059	0.468242	0.331729	0.225816	0.342991	0.310905	0.267632	0.360576
HC10-H0	0.209762	0.351865	0.164588	0.468862	0.237142	0.259853	0.303786	0.108452	0.0791305	0.397717	0.228206	0.148591	0.137253	0.392506	0.193496	0.362308	0.23441	0.348478	0.255319	0.159766	0.305732	0.633589	0.625412	0.423846	0.403328	0.625447	0.544518	0.636425	0.310153	0.579755	0.635238	0.439415	0.631461	0.352658	0.220892	0.296133	0.152645	0.262507	0.21907	0.212049	0.462528	0.326083	0.199753	0.302234	0.495502	0.285916	0.205649	0.264448	0.13915
HT11-D5	0.272121	0.320021	0.313109	0.196472	0.283962	0.575982	0.175487	0.31518	0.333631	0.201359	0.245446	0.33262	0.382104	0.209361	0.279093	0.164295	0.435755	0.357041	0.271722	0.281441	0.174363	0.260806	0.342998	0.0873838	0.113294	0.252678	0.202211	0.363686	0.152882	0.250263	0.318887	0.0950432	0.258557	0.254203	0.273596	0.183704	0.332746	0.251461	0.377703	0.258309	0.144989	0.197336	0.346004	0.273089	0.165371	0.296766	0.279779	0.194374	0.295587
HC10-D7	0.0736081	0.138677	0.0943931	0.316983	0.120224	0.413192	0.17931	0.131419	0.155186	0.236917	0.123596	0.123745	0.163869	0.283231	0.135889	0.200892	0.187168	0.256663	0.157131	0.103759	0.176205	0.502788	0.520616	0.294688	0.265476	0.494515	0.41503	0.521278	0.158939	0.449182	0.504164	0.309367	0.500845	0.141987	0.116467	0.146424	0.166317	0.144132	0.113858	0.129688	0.32806	0.165997	0.230169	0.173333	0.352561	0.195806	0.110484	0.124064	0.117134
HT4-H0	0.157142	0.275394	0.0955227	0.420972	0.199571	0.31739	0.253322	0.0863651	0.0600316	0.34628	0.199558	0.0999287	0.0947191	0.375789	0.180925	0.311937	0.173511	0.316934	0.237179	0.121212	0.285023	0.610735	0.620788	0.400131	0.379524	0.602281	0.522316	0.6205	0.264352	0.557933	0.612471	0.41724	0.609563	0.286453	0.181152	0.255335	0.159422	0.226758	0.163457	0.184669	0.435138	0.26683	0.172898	0.256128	0.468173	0.272396	0.160021	0.235945	0.121514
HT1-H0	0.107082	0.176156	0.145145	0.263918	0.12343	0.429109	0.0836875	0.166444	0.175723	0.214963	0.119937	0.155799	0.200381	0.238612	0.142281	0.158766	0.256121	0.236116	0.138187	0.122857	0.132154	0.445289	0.477585	0.239382	0.22084	0.436847	0.358053	0.477853	0.103615	0.399736	0.463316	0.252639	0.444109	0.173944	0.120952	0.106874	0.199351	0.125687	0.20796	0.131448	0.269646	0.11237	0.245517	0.121765	0.307117	0.193324	0.111762	0.104069	0.15739
HT14-H0	0.206147	0.328823	0.146202	0.477375	0.24787	0.29864	0.304885	0.131321	0.0885719	0.397614	0.250871	0.145804	0.126179	0.417734	0.218197	0.362759	0.21278	0.371539	0.278518	0.178126	0.33071	0.654467	0.647168	0.444795	0.428458	0.646033	0.566057	0.655439	0.313813	0.601348	0.660492	0.461059	0.653121	0.333052	0.222719	0.307265	0.183343	0.283025	0.199194	0.236434	0.484378	0.32251	0.219152	0.313008	0.520767	0.312951	0.216341	0.288197	0.164805
HT1-D5	0.316686	0.455656	0.267353	0.572646	0.342239	0.323944	0.384953	0.220028	0.191136	0.500537	0.32268	0.254741	0.253932	0.486481	0.296063	0.466445	0.339041	0.439207	0.350479	0.263674	0.404487	0.708744	0.703091	0.499255	0.481309	0.700113	0.619743	0.732194	0.414136	0.654585	0.709076	0.514859	0.706096	0.455923	0.324806	0.400479	0.259234	0.356116	0.321409	0.30309	0.537187	0.430101	0.227893	0.405838	0.570456	0.378555	0.30955	0.349865	0.250065
HC5-H0	0.107693	0.255711	0.078522	0.394695	0.165777	0.342353	0.231747	0.0678127	0.0676711	0.315381	0.166918	0.0772242	0.0936334	0.357978	0.154557	0.282527	0.175207	0.287994	0.202929	0.0908375	0.255419	0.585129	0.595349	0.37832	0.345019	0.577031	0.496699	0.59929	0.239911	0.532061	0.587565	0.391827	0.583754	0.260139	0.16957	0.229132	0.142668	0.198478	0.162484	0.149266	0.410195	0.2442	0.154601	0.232494	0.435377	0.255081	0.145331	0.202514	0.0766985
HT5-H0	0.162676	0.216982	0.199861	0.21725	0.175732	0.477936	0.0806543	0.208269	0.221368	0.163203	0.150735	0.219126	0.270092	0.178511	0.184742	0.104811	0.321953	0.278989	0.187043	0.172036	0.087583	0.367896	0.417166	0.171692	0.155705	0.359324	0.287042	0.409934	0.0533599	0.333551	0.397201	0.174759	0.366501	0.174498	0.167089	0.0747471	0.241035	0.158183	0.265809	0.168002	0.190956	0.0979096	0.289465	0.167154	0.236061	0.212173	0.17138	0.110622	0.200221
HT9-H0	0.224523	0.274734	0.266742	0.190632	0.236571	0.527315	0.123184	0.269612	0.285084	0.168586	0.2055	0.282941	0.327045	0.167451	0.231676	0.12707	0.38273	0.316776	0.223293	0.233932	0.12848	0.310839	0.365633	0.125462	0.114971	0.302092	0.242065	0.370858	0.106514	0.287288	0.354789	0.125866	0.309862	0.212589	0.237032	0.141119	0.286494	0.209462	0.329217	0.219614	0.149897	0.146779	0.332516	0.226288	0.196272	0.262408	0.234903	0.15704	0.249177
HT11-D3	0.270559	0.324462	0.3163	0.178865	0.284951	0.579117	0.174072	0.317938	0.336463	0.198108	0.249336	0.333641	0.383001	0.214536	0.279425	0.161576	0.4352	0.3646	0.27229	0.285931	0.173957	0.255975	0.324672	0.0858525	0.107854	0.247346	0.197409	0.347675	0.152989	0.242492	0.313237	0.0810817	0.254094	0.256167	0.28225	0.184542	0.332926	0.258022	0.378408	0.262642	0.134828	0.197853	0.35982	0.278865	0.154706	0.30641	0.282276	0.195003	0.297888
HT10-H0	0.312319	0.307882	0.253811	0.556097	0.345445	0.172498	0.35781	0.245859	0.213417	0.496831	0.350592	0.241613	0.18621	0.515273	0.3275	0.463214	0.179253	0.303856	0.377975	0.266065	0.438763	0.763482	0.759707	0.556152	0.532753	0.755043	0.675741	0.762823	0.417283	0.710287	0.765136	0.570286	0.762002	0.445664	0.334372	0.408816	0.293054	0.359039	0.309855	0.338116	0.585917	0.392625	0.303572	0.264571	0.620136	0.42317	0.29581	0.390256	0.279087
HT4-D5	0.627961	0.666014	0.632844	0.597019	0.643546	0.825254	0.577531	0.633027	0.623786	0.626203	0.629092	0.640251	0.656968	0.642861	0.632384	0.578189	0.701034	0.728565	0.639484	0.631471	0.606266	0.524798	0.602557	0.579485	0.594987	0.515493	0.580849	0.583138	0.588875	0.588351	0.591706	0.569032	0.522499	0.620803	0.609234	0.607232	0.633558	0.638905	0.642847	0.63309	0.458938	0.613356	0.675466	0.665923	0.590078	0.577112	0.637771	0.613249	0.629162
HT7-D3	0.257704	0.309816	0.299842	0.183934	0.269923	0.562283	0.150318	0.304009	0.321252	0.183321	0.23557	0.318563	0.367504	0.197554	0.267473	0.146582	0.419957	0.348897	0.260128	0.268567	0.161864	0.285905	0.352663	0.109625	0.11767	0.277293	0.224132	0.358254	0.137433	0.270873	0.339036	0.108536	0.284054	0.239591	0.26478	0.171084	0.320466	0.242486	0.361764	0.247886	0.143432	0.183166	0.355727	0.260392	0.18094	0.291919	0.265535	0.184305	0.283968
HT12-D3	0.456611	0.500821	0.498116	0.29923	0.471626	0.757456	0.350266	0.50526	0.522244	0.375939	0.433484	0.520127	0.567768	0.395966	0.466866	0.342106	0.619448	0.540449	0.456779	0.465269	0.360957	0.0989538	0.30934	0.253829	0.285529	0.0822155	0.199757	0.272793	0.338381	0.206698	0.217562	0.213427	0.0979751	0.43722	0.462744	0.370448	0.521293	0.438742	0.564414	0.445951	0.238574	0.381134	0.521271	0.455318	0.228152	0.479885	0.468154	0.38117	0.48478
HT15-D5	0.440877	0.486378	0.484767	0.281483	0.456532	0.744198	0.33174	0.489085	0.501433	0.366304	0.420701	0.501076	0.549592	0.386978	0.451164	0.326964	0.599176	0.531329	0.440387	0.453406	0.345233	0.111344	0.290734	0.240826	0.268997	0.095307	0.190727	0.265191	0.321464	0.197772	0.210634	0.203717	0.11158	0.426901	0.450331	0.357014	0.505641	0.426494	0.548383	0.433902	0.224565	0.365883	0.511178	0.442539	0.219612	0.465813	0.454953	0.366693	0.468802
HT11-D7	0.137013	0.260998	0.162969	0.319525	0.15333	0.44851	0.125055	0.164828	0.192589	0.257059	0.102725	0.181084	0.239072	0.265218	0.149839	0.207053	0.302603	0.230786	0.154299	0.129885	0.161834	0.426874	0.485832	0.233168	0.208166	0.41846	0.345499	0.506101	0.157967	0.393496	0.45523	0.23556	0.42515	0.244771	0.148935	0.152706	0.214442	0.122845	0.243285	0.109503	0.257389	0.182966	0.190489	0.167511	0.289116	0.199762	0.145607	0.0935517	0.150095
HC4-H0	0.154589	0.308255	0.129157	0.43908	0.204977	0.309307	0.275422	0.103362	0.0779152	0.354954	0.207079	0.121182	0.116127	0.397596	0.193122	0.32467	0.20772	0.327318	0.244915	0.131209	0.296266	0.625334	0.631488	0.417812	0.384711	0.616964	0.538151	0.635656	0.282778	0.571659	0.626079	0.432497	0.623246	0.310467	0.208402	0.269008	0.16582	0.240701	0.192658	0.18836	0.450449	0.292524	0.133291	0.277419	0.475001	0.288024	0.18663	0.246147	0.118961
HT12-D5	0.278532	0.331247	0.318363	0.208477	0.292774	0.582423	0.171731	0.325503	0.34229	0.207833	0.25335	0.340418	0.388193	0.218557	0.286904	0.173424	0.441248	0.368625	0.277489	0.285468	0.181392	0.261642	0.349997	0.101227	0.122864	0.252442	0.209882	0.370803	0.159899	0.256782	0.325247	0.0987552	0.258902	0.262895	0.283794	0.190982	0.342012	0.259025	0.38464	0.26549	0.15453	0.20429	0.342873	0.280275	0.172748	0.302878	0.289019	0.202858	0.30571
HT6-D5	0.12772	0.256093	0.161635	0.32937	0.147967	0.440039	0.12376	0.155299	0.172044	0.272127	0.111742	0.177488	0.223084	0.270845	0.120986	0.219696	0.290164	0.239498	0.129011	0.131433	0.159201	0.432502	0.474553	0.229248	0.218454	0.424003	0.345714	0.502845	0.161463	0.391559	0.460954	0.239566	0.430304	0.238156	0.148912	0.156889	0.178814	0.137845	0.236318	0.113934	0.27098	0.186193	0.198673	0.167159	0.305653	0.200465	0.131919	0.108618	0.139862
P8	0.0683347	0.192435	0.0989859	0.329734	0.120337	0.419261	0.151568	0.123995	0.134631	0.2595	0.119611	0.128059	0.171595	0.292585	0.113048	0.211911	0.232973	0.255878	0.158264	0.104002	0.181364	0.494446	0.5164	0.286077	0.268454	0.48602	0.405812	0.518834	0.161458	0.441346	0.510704	0.301727	0.492417	0.202563	0.0989853	0.156338	0.165612	0.155691	0.168484	0.126048	0.329663	0.174162	0.210744	0.165912	0.362862	0.193295	0.0926724	0.135756	0.121687
HT10-D5	0.339038	0.385116	0.37904	0.197124	0.353192	0.638702	0.231522	0.385988	0.401213	0.260309	0.313243	0.399956	0.448874	0.277666	0.349647	0.221904	0.50057	0.424408	0.340267	0.346866	0.243437	0.204542	0.295276	0.143555	0.171269	0.195821	0.158764	0.315459	0.218263	0.208385	0.273968	0.0990033	0.203326	0.318706	0.34155	0.252931	0.402521	0.318838	0.444903	0.326614	0.127677	0.263058	0.408608	0.334909	0.117141	0.363884	0.349171	0.26184	0.366329
HT1-D7	0.274646	0.325321	0.314735	0.203178	0.287155	0.577915	0.168982	0.317581	0.333345	0.203822	0.247961	0.333764	0.384382	0.212705	0.282746	0.166103	0.438108	0.361502	0.276136	0.282367	0.177779	0.268593	0.35094	0.0983625	0.120344	0.260094	0.212153	0.371737	0.154733	0.26198	0.331342	0.099256	0.267095	0.257669	0.275871	0.186772	0.335413	0.254736	0.379481	0.260625	0.147911	0.201279	0.346134	0.273354	0.170578	0.300924	0.281937	0.195857	0.297364
HC4-D3	0.151069	0.293415	0.111242	0.408009	0.189392	0.310527	0.235122	0.0637124	0.0493092	0.344617	0.172106	0.101496	0.119705	0.362962	0.157949	0.300901	0.20915	0.300089	0.21827	0.0989395	0.258527	0.586443	0.597569	0.37659	0.348409	0.577551	0.497611	0.601243	0.254256	0.533053	0.588909	0.392666	0.584732	0.301844	0.178505	0.240367	0.129039	0.208599	0.198766	0.157792	0.410255	0.269493	0.13651	0.24269	0.439278	0.253442	0.157365	0.207771	0.0942539
HT14-D5	0.269546	0.324613	0.311447	0.203397	0.282601	0.574865	0.164715	0.312849	0.330502	0.198276	0.245206	0.330012	0.379863	0.209264	0.278002	0.15808	0.433556	0.362234	0.271186	0.279855	0.172858	0.273195	0.353233	0.102043	0.1061	0.264214	0.215642	0.375853	0.149811	0.26364	0.332528	0.101905	0.270943	0.253442	0.274804	0.181907	0.330296	0.254158	0.374787	0.257375	0.152951	0.19738	0.342381	0.273338	0.178203	0.302073	0.276724	0.190833	0.295204
HT13-D5	0.416482	0.461527	0.458953	0.261204	0.432041	0.718073	0.311259	0.465003	0.481995	0.336438	0.393266	0.480457	0.528748	0.356602	0.426918	0.302528	0.58001	0.501407	0.417958	0.425972	0.320589	0.131576	0.28173	0.214171	0.243814	0.11678	0.158899	0.273884	0.298642	0.16887	0.208836	0.172449	0.131553	0.395831	0.423593	0.330099	0.481071	0.399367	0.524669	0.405689	0.200859	0.34175	0.481457	0.415485	0.188055	0.442162	0.428343	0.3418	0.444919
HT1-D3	0.356746	0.367263	0.383855	0.199224	0.381651	0.671754	0.265337	0.428175	0.438322	0.280881	0.371181	0.415023	0.44466	0.329828	0.402669	0.250056	0.485653	0.467311	0.391782	0.375258	0.298488	0.212053	0.308079	0.222677	0.25028	0.203828	0.216553	0.291973	0.249167	0.232143	0.275782	0.184138	0.210718	0.317845	0.375334	0.285393	0.459867	0.362227	0.443141	0.38716	0.20554	0.268405	0.486605	0.35976	0.207384	0.42426	0.366634	0.327442	0.417354
HT6-D7	0.260768	0.301034	0.298345	0.212601	0.273664	0.560947	0.145844	0.30495	0.316017	0.203054	0.233394	0.317477	0.367722	0.199331	0.269171	0.155484	0.41749	0.347845	0.261076	0.266883	0.164124	0.292376	0.36518	0.113433	0.11355	0.283781	0.232617	0.381688	0.137835	0.277926	0.347018	0.119728	0.291108	0.245075	0.256152	0.173056	0.322652	0.238794	0.365616	0.24738	0.144637	0.185353	0.330264	0.257735	0.192762	0.281163	0.269253	0.182842	0.283954
HT13-D7	0.211171	0.29835	0.244095	0.387809	0.248144	0.508432	0.212162	0.241113	0.260442	0.326273	0.231381	0.253605	0.297132	0.347498	0.249535	0.272621	0.355965	0.352864	0.248923	0.226642	0.238639	0.528696	0.528975	0.330004	0.294046	0.519973	0.447906	0.547925	0.246632	0.477888	0.521357	0.345218	0.526923	0.292334	0.238717	0.239083	0.258569	0.24646	0.296816	0.234276	0.267562	0.262268	0.257736	0.286242	0.386227	0.216952	0.252113	0.208816	0.216462
HT8-H0	0.160214	0.24369	0.100239	0.429974	0.202199	0.350661	0.264732	0.112596	0.102217	0.347981	0.20383	0.107298	0.120998	0.380366	0.180119	0.316687	0.142227	0.321779	0.239529	0.133282	0.287699	0.61503	0.619902	0.407372	0.381517	0.606869	0.527289	0.62258	0.270234	0.561771	0.616457	0.421397	0.613336	0.231631	0.189438	0.258867	0.182912	0.235581	0.103853	0.189327	0.440646	0.275801	0.224653	0.26574	0.471156	0.280768	0.17075	0.240527	0.140864
HT10-D3	0.556025	0.569692	0.586979	0.399413	0.567893	0.852763	0.463301	0.601589	0.617669	0.469122	0.519868	0.61575	0.66345	0.492738	0.542037	0.446265	0.714783	0.635943	0.552893	0.565782	0.46326	0.201727	0.391962	0.363908	0.342573	0.189371	0.309179	0.330643	0.445736	0.309902	0.311159	0.330878	0.201255	0.510681	0.558765	0.474354	0.60725	0.535388	0.658571	0.543009	0.355818	0.483807	0.621233	0.562288	0.340816	0.574313	0.565277	0.485106	0.581808
HT13-D3	0.506396	0.548459	0.523504	0.425047	0.516115	0.734266	0.444924	0.526157	0.527736	0.467833	0.496651	0.535115	0.563494	0.480722	0.50896	0.434371	0.609259	0.595788	0.506668	0.514108	0.455631	0.349699	0.403881	0.402352	0.42561	0.340524	0.386864	0.398358	0.441084	0.391297	0.390924	0.38516	0.347594	0.486463	0.493395	0.461095	0.527644	0.503288	0.550135	0.503237	0.3551	0.469428	0.566097	0.534801	0.397705	0.488612	0.514846	0.469856	0.517142
HT5-D5	0.380624	0.401896	0.416899	0.362907	0.390979	0.675606	0.294117	0.420515	0.437024	0.349856	0.351903	0.439073	0.4735	0.360361	0.357369	0.322459	0.534517	0.467541	0.369324	0.39886	0.289384	0.388504	0.431981	0.302038	0.242829	0.379797	0.386084	0.428288	0.294704	0.404924	0.437059	0.312143	0.389731	0.367759	0.39075	0.308066	0.39475	0.369115	0.478509	0.373774	0.324153	0.325098	0.453023	0.397033	0.366201	0.403765	0.392928	0.313251	0.398372
HT9-D7	0.311933	0.373408	0.314079	0.469599	0.324882	0.515854	0.285161	0.308852	0.303748	0.393564	0.310844	0.320393	0.340786	0.383649	0.313114	0.354037	0.392639	0.427132	0.325478	0.314156	0.31323	0.587711	0.568298	0.38815	0.374333	0.578489	0.498841	0.604693	0.316137	0.536959	0.580702	0.398736	0.585512	0.363606	0.291376	0.309881	0.31167	0.322305	0.322862	0.314415	0.379431	0.336679	0.370589	0.362076	0.461405	0.29818	0.313748	0.292319	0.31004
HT14-D3	0.300977	0.42899	0.287055	0.528199	0.321104	0.487998	0.376902	0.282554	0.28868	0.457684	0.29627	0.292788	0.315707	0.449102	0.295106	0.417899	0.366232	0.399538	0.321625	0.294211	0.374671	0.65694	0.621786	0.455077	0.444299	0.648827	0.567739	0.661083	0.383491	0.597967	0.658864	0.469629	0.655223	0.4239	0.297942	0.372959	0.315133	0.323947	0.317224	0.285145	0.449488	0.395765	0.373563	0.382898	0.524014	0.316654	0.302961	0.328607	0.287141
[truncated: 76 more columns]

## Sheet: Weighted_unifrac_PC
Eigvals	125
4.51247	0.815983	0.482521	0.385002	0.301698	0.25976	0.166622	0.13938	0.111198	0.0955869	0.0679541	0.0605819	0.0559942	0.0445563	0.0433688	0.0369575	0.032312	0.0280025	0.0238547	0.0221171	0.0190451	0.0183875	0.01478	0.0138487	0.012269	0.0119074	0.0101332	0.00927705	0.00818513	0.00720725	0.00660685	0.00585419	0.00534842	0.00500697	0.00452735	0.00392863	0.00371244	0.00359782	0.00297379	0.00281012	0.00245727	0.00197847	0.00178721	0.00149654	0.00145106	0.00121023	0.000971214	0.00075522	0.000650098	0.000448798
Proportion explained	125
0.573432	0.103693	0.0613173	0.0489249	0.0383389	0.0330096	0.0211739	0.0177119	0.0141307	0.0121469	0.0086354	0.00769857	0.00711558	0.00566208	0.00551118	0.00469645	0.00410612	0.00355848	0.00303138	0.00281057	0.00242019	0.00233662	0.00187819	0.00175985	0.00155911	0.00151316	0.0012877	0.0011789	0.00104014	0.000915877	0.000839579	0.000743934	0.000679661	0.000636271	0.000575323	0.000499238	0.000471765	0.000457201	0.0003779	0.000357102	0.000312263	0.000251419	0.000227113	0.000190175	0.000184396	0.000153792	0.000123419	9.59711e-05	8.26126e-05	5.70319e-05
Species	0	0
Site	125	125
HC1-D5	0.0814312	-0.0361211	0.00858904	-0.000903056	0.0289867	-0.0125618	-0.0352733	0.0231262	-0.00419749	0.00403555	-0.0045551	0.013152	-0.0155737	0.0225524	-0.00561196	-0.0094863	0.0176607	0.00784136	-0.0151845	0.00894255	-0.00516781	0.0173039	-0.000776882	0.00766223	-0.00688193	0.00476685	-0.00251377	0.00110196	-0.00160342	-0.0118375	0.00637267	0.00180007	-0.00277227	-0.00496813	-0.00272905	0.0025344	0.00967558	0.00670978	-0.00112868	-0.000144188	-0.00256123	-0.0045753	-0.00323412	-0.00370795	-0.00606181	0.0100892	0.00549808	0.0060987	0.000917152
HC10-D5	0.0890601	-0.0657187	-0.110305	-0.140026	0.0132582	-0.0624457	-0.0289688	-0.0467181	-0.0255244	-0.0281886	0.0488986	-0.0337581	0.00148215	-0.0120464	-0.00915732	0.0132536	-0.00386929	-0.029561	-0.0328755	-0.00388603	-0.00110148	0.00205996	0.0145206	0.00102165	0.00941747	0.0104885	-0.00125241	0.00994069	0.000534481	-0.00121603	0.00955833	-0.00565191	-0.00120654	-0.000905995	-0.00355098	-0.00240841	0.00422518	-0.000478293	0.00591775	-0.00190358	0.00167185	-0.00429228	-0.00100155	0.00112919	-0.00212791	-0.0011051	-6.98066e-05	0.00103523	0.00175229
HC11-D5	0.132187	-0.0128321	0.0112736	-0.00891313	0.025989	0.0166901	-0.0345405	0.0106275	-0.00997502	3.92679e-05	0.0214118	0.0229247	0.00897397	-0.0056014	-0.0160165	-0.0173316	0.000493411	-0.0115101	0.00791349	0.0146275	0.00169693	0.00508736	0.00387637	-0.00739095	-0.00601479	-0.00873542	0.00174352	-0.00847779	0.0183105	0.00174584	-0.0113041	-0.00418221	0.00558554	0.00879229	0.00536468	0.00566516	-0.0179403	0.00210151	0.00843588	0.00542726	-0.00182385	0.000230069	-0.0066693	0.00663694	0.00151323	0.0024006	-0.000514541	0.000126043	-0.00357211
HC12-D3	-0.182337	-0.123827	-0.00686645	-0.0547899	-0.0171935	0.053323	0.0290782	0.00943776	-0.0239293	0.0340554	-0.0126083	0.0241736	0.00804637	0.0296214	0.0241045	0.00803207	-0.0165391	0.011229	0.00934979	-0.0165566	0.0224712	-0.0222984	0.0228377	0.0153706	0.0254172	-0.00576517	-0.00809764	0.0192679	-0.00108747	-0.0069292	-0.00514592	0.00564114	-0.00568087	-0.00510754	0.000980384	-0.00444315	-0.00224464	-0.000290842	0.00371932	-0.00451212	-0.00195088	-0.00181244	0.00168767	0.0016729	-0.00219012	-0.00022017	-0.00174893	-0.000368675	0.000177469
HC12-D5	0.0625508	-0.0961059	0.048671	0.0172847	0.00224	-0.00350155	-0.00219943	0.0100882	-0.0278315	-0.0127105	-0.0245792	-0.0041666	-0.0171306	0.019673	0.00475818	0.002239	0.00532765	0.0105322	-0.00382738	-0.0220352	0.00917398	0.0094275	-0.0073103	0.00929251	0.0169004	-0.00268405	-0.00603228	0.00360731	-0.00209166	0.00260554	-0.00332816	0.00694133	0.000245488	-0.00158974	0.00871283	-0.0059315	0.00303638	0.00480753	-0.00273173	8.52724e-06	-0.00427468	-0.00477134	-0.00172852	-0.000718951	0.00776546	0.00232559	0.00445711	0.00122676	-0.00676161
HC12-H0	0.37398	-0.036016	-0.0907747	0.000151411	-0.184013	0.0704889	0.023102	-0.0329779	0.0790293	0.0232297	0.0423383	-0.021864	0.0119916	-0.00151451	-0.0172801	0.00933162	-0.00862113	0.017618	0.00500976	0.0158187	0.00460595	0.0152053	0.00538147	-0.00260942	0.00122394	-0.00140766	-0.00761882	-0.012986	0.0144028	-0.0106778	-0.00271484	-0.00573703	0.00215636	-0.00423451	-0.00171419	-0.00216257	-0.0024802	0.000993695	0.000170212	0.00209931	-0.000556335	0.00176317	-0.00126882	0.00274004	0.000507942	-0.00110138	0.00193106	0.00122615	0.00103428
HC13-D7	-0.0096554	0.0138033	-0.075292	-0.0330376	-0.0286039	-0.0562968	0.037617	-0.0258178	-0.00461875	0.000878984	-0.0195285	0.0123423	0.0109014	-0.000500981	0.0116761	0.0488778	-0.0197928	0.00257687	-0.00244558	-0.00122801	-0.032481	-0.00975589	0.00344425	0.00697852	0.00275569	0.0216696	0.0148073	-0.00315763	0.0127772	-0.00749461	0.00948924	-0.00784535	-0.00740257	0.0132791	0.000474895	0.0026826	0.00481192	-0.0036733	0.00278699	0.00279927	0.00341726	-0.00203256	0.00393032	-0.00238303	0.0037708	0.0013096	-0.00394308	-0.000366961	-0.000259594
HC14-D3	0.143467	0.00489776	0.0264151	0.0343866	0.00165187	0.0265717	-0.0129304	0.00347968	0.0242594	0.0200203	0.0060307	0.00469601	-0.0122514	-0.00264723	-0.0144109	-0.00517572	0.00163483	0.0014108	0.0105345	0.0105524	0.00657536	-0.00119206	0.0126017	-0.00986283	0.0020132	-0.00211568	-0.00109464	0.0089983	0.00181363	0.00236776	-0.000677205	0.00365387	-0.00800755	0.00762219	0.00773586	0.00414986	-0.00741863	-0.00825829	-0.00826035	0.00996853	-0.00838428	-0.00518366	0.00017606	0.00613906	0.00247762	0.0101166	-0.00142191	-0.000831839	0.000738559
HC14-H0	0.168734	0.0405668	0.0207199	0.0229103	0.00307752	0.0376317	0.0061004	-0.000722008	0.0188979	0.0144586	-0.0112593	0.0118363	-0.0118867	-0.0244002	-0.0177749	-0.00346955	0.0147172	-0.00842288	0.00398958	-0.0026439	0.00291985	-0.0091371	-0.00587233	0.00899017	0.0188638	0.0047855	0.0104375	0.0171906	-0.00765287	0.00821913	-0.00690856	-0.00214375	0.00354421	-0.00670676	0.00904963	0.00299653	-0.00805348	-0.00231118	-0.00694777	-0.00715281	0.000608981	0.000106098	-0.00246008	-0.00187686	-0.0117755	-0.00141474	-0.00276225	-0.00346136	-5.30736e-05
HC2-D7	-0.0979772	-0.132843	0.0307312	-0.0282848	0.0389514	0.0134379	0.0597769	0.00814006	-0.0309758	0.0177029	-0.011566	-0.00883253	0.00644295	0.0366681	-0.0185012	-0.039046	0.0108147	-0.00505822	0.0177	0.0017269	0.00206389	0.0136229	-0.00372737	-0.00592703	0.00324018	0.0164465	-0.0096931	0.00694738	0.0105114	-0.00384031	0.00893352	0.00846842	0.00814456	0.0059216	0.00378449	-0.000555982	-0.00413443	-0.00552125	0.00656833	0.0061799	0.00739089	0.00392857	-0.00383709	-0.00205023	0.000671334	-0.00533387	-0.00144746	-0.00118427	0.00196688
HC3-D5	0.0441902	-0.0587632	0.0245619	0.0441585	-0.00502568	-0.0231721	-0.0338087	-0.00869625	-0.00414817	-0.0178531	0.0113234	-0.00124528	0.00832264	0.00235239	-0.0117912	-0.00344288	-0.00876747	0.0242558	0.00773239	-0.00068189	0.00278749	0.000418143	-8.08205e-05	0.000491936	-0.00226459	0.00785797	0.00265573	-0.0147825	-0.0110395	-0.000935537	-0.00441128	-0.00536871	0.0022094	-0.00661315	-0.00708292	-0.00207309	-0.0134306	-0.00453304	0.00631732	-0.00203181	0.00361969	-0.0025448	0.000107076	0.000786135	-0.00230002	0.00597889	-0.00541779	-0.00351048	0.00119386
HC5-D3	0.144892	-0.0316256	0.0336564	0.000567854	0.00717289	0.0313225	-0.0260426	0.0190642	0.00751384	0.0143207	-0.00448838	0.0161437	0.0148736	0.0114422	0.00939981	-0.0130058	-0.00741367	-0.00454879	0.00816948	0.0248672	-0.000699014	-0.00208775	-0.00777186	0.00953089	-0.00576678	-0.00947512	1.8917e-07	0.0147143	-0.0084348	0.0175385	-0.00849346	0.00828667	-0.00403596	-0.000336323	-0.000238707	0.00202371	0.00518061	0.00338994	0.00187095	0.0114917	0.006964	-0.00107757	0.00236593	0.00769835	0.000333538	-0.0050129	-0.00202039	0.00282947	0.00181342
HC5-D5	0.202834	-0.00605292	0.00289826	-0.0383174	0.000320074	0.0421751	-0.00988087	0.000103948	0.0261276	0.0150585	0.00123702	0.02671	-0.016904	0.0309671	0.0135349	0.00694175	-0.0185694	-0.013024	-0.00743405	-0.00847714	-0.00139144	0.00185555	-0.00899529	-0.00835376	-0.00321836	0.012497	0.0118011	0.00546412	0.0142913	-0.00997936	-0.0113152	-0.0115477	0.0147515	0.00736095	-0.00482585	-0.00547288	-0.00222806	-0.00944011	-0.000286069	0.00374995	-0.00297065	0.00621863	0.00149665	-0.00661865	-0.00845902	0.00401256	-0.00153415	-0.00215298	-0.000827242
HC6-D3	-0.105476	-0.147665	0.065566	0.0210028	0.00956418	0.00114071	0.119891	-0.0249737	-0.0109384	-0.00288689	0.00752737	-0.00420274	0.00473078	0.00404911	-0.0438548	0.0203036	-0.0305147	-0.0286741	0.00988475	0.0162066	-0.0250403	-0.0115509	-0.0161232	-0.000748102	-0.0206213	-0.0116264	-0.00628848	0.0007291	-0.012446	0.00098964	0.00080879	0.000659374	0.00186908	-0.00498571	0.00243623	-0.00357775	-0.00056951	0.00254443	-0.00223921	-0.00269788	-0.00193019	-0.00086771	0.000500489	-0.00103294	0.00166248	0.00155106	0.000380547	-0.00204623	-0.000742373
HC6-D5	0.0748546	-0.0520524	0.0443211	0.0428304	0.00275179	0.000867194	-0.0361909	-0.0451038	0.0121359	-0.0220612	0.00689498	-0.000654506	-0.00166497	-0.0206489	-0.00958955	-0.0068746	-0.00997817	0.0028367	-0.0159237	0.00301342	-0.00286349	-0.00409496	0.011106	0.0145897	-0.0051027	-0.0106902	-0.000603468	-0.00666608	-0.00379693	-0.0062764	0.0093573	-0.00538269	0.0028626	0.0092448	-0.00865782	3.41811e-05	0.00186908	-0.0144321	-0.000463148	-0.00132715	-0.00544917	0.00349425	0.000302558	0.00235496	0.00134058	-0.00200568	0.000175535	0.00652489	-0.00108786
HC7-D5	-0.0822884	-0.0768538	0.00807197	-0.0428127	0.0118286	-0.0109805	0.00998642	0.0109165	0.00499114	0.0239936	-0.0273542	-0.00119096	0.0322151	-0.00380463	0.00154	-0.018846	0.0204885	0.0118882	0.0127358	0.00336681	-0.010622	-0.0109633	-0.00904474	-0.0108765	0.00745012	0.00785778	0.000500931	-0.00923045	-0.00678447	0.00263553	0.013346	0.00743022	0.00608023	0.00597187	-0.000559886	-0.00702997	-0.00586986	0.0119718	-0.00555374	-0.00180589	-0.00542642	0.00190673	-0.00136122	-0.00506564	0.00138241	0.00295906	0.00220213	-0.00167846	0.00400166
HC7-D7	0.236503	-0.0593397	-0.0316419	-0.106289	-0.0250381	0.0234126	-0.0389895	0.018086	0.0302351	-0.0244445	0.0370071	-0.0160752	-0.0314553	-0.0140387	0.0181944	-0.00386532	-0.0323262	-0.0134689	0.0145782	0.0235922	-0.00452446	0.00397678	0.000447489	0.00657779	0.0104662	0.000878323	0.00424669	0.0123492	-0.00567136	-0.00156372	-0.00265597	0.00857026	-0.000612941	-0.00114908	0.00189766	0.00382492	-0.00133557	0.00293844	-0.00238672	0.00299412	-7.81286e-05	-0.000309229	0.00692651	-0.00290239	9.75127e-05	0.00120897	0.00275854	-0.000705788	-0.000467503
HC7-H0	0.0996887	-0.179448	-0.0539896	0.00792527	-0.147888	-0.0544894	-0.0103795	-0.0145859	-0.0148685	-0.0409125	0.0101015	-0.0326852	-0.0227664	0.00649663	0.0185842	-0.0192774	-0.0197765	-0.00270034	0.0126386	-0.020031	0.000691911	0.024123	0.00190071	-0.0023384	-0.00286875	0.00887875	-0.00606638	-0.0038603	-0.000743345	-0.0031054	-0.00509167	0.00184621	0.000106916	-0.000397463	0.000703798	0.00387651	0.00310761	0.000826759	-0.000672388	0.00184452	0.00068046	-0.00401645	2.04394e-05	-0.00249391	-0.000201637	0.000184411	-0.000816582	-0.00122991	0.00147843
HC8-D7	0.0375635	-0.0998116	0.0623623	0.0422475	-0.0160974	-0.0116177	0.00861122	-0.0132257	-0.0226653	-0.0120631	-0.00392979	-0.00508194	-0.0457814	0.0232271	0.020478	0.0171799	-0.0195338	0.00601802	-0.00467719	-0.0140057	0.00521731	0.0123741	-0.0155873	0.0116104	-0.00420236	-0.0094322	-0.0087794	-0.00142108	0.0161875	0.0130744	0.00106904	0.00333466	0.00132634	0.000691063	0.0013609	-0.00157293	-0.00134589	-0.000806491	0.0022507	-0.00800162	-0.00163702	0.00202093	-0.001787	-0.000165892	-0.00421112	0.0025355	-0.00683002	0.00162678	0.00185624
HC8-H0	0.11327	0.000307497	-0.0207343	0.02696	-0.00716506	-0.00143196	-0.0263841	0.0145093	-0.0147372	0.0133778	0.0145767	0.0243823	0.00222653	0.0104655	-0.0169562	0.0109433	-0.00361738	-0.0140532	0.0143756	-0.0150401	-0.0090967	-0.0130886	0.0180999	0.00926224	0.00903551	-0.0207917	-0.00456693	-0.00578152	0.0143362	0.00106577	0.00199713	-0.000622902	-0.00259369	-0.00200689	-0.000939422	-0.00820144	0.000805136	0.0101737	0.00930552	-0.00688688	0.0047548	-0.000648745	-0.00564364	0.00626522	-0.00449402	-0.000872302	-0.00274151	-0.000399157	0.000474465
HC9-D5	-0.0507434	-0.0748059	0.0244311	0.0226134	0.00546584	-0.0258057	0.021436	-0.0175754	0.0245784	-0.00269563	-0.0213345	-0.0206845	-0.00955885	0.00613419	-0.00764611	0.0205708	0.00307603	-0.00415633	0.00563137	0.00648321	-0.0105083	0.00481194	0.0185775	-0.00509374	0.0147554	-0.00283055	0.011504	-0.00486414	0.00843726	-0.00621718	-0.00292705	0.00797227	0.00285056	-0.00210728	-0.0111777	0.00474827	0.00611063	-0.000937403	0.00311198	0.0070205	-1.47341e-05	-0.00810995	-0.00125224	-0.0031758	0.00235508	-0.0031133	0.00204833	0.00290751	0.00545988
HT2-D3	-0.39775	0.00126293	-0.00626029	0.0333198	-0.0388681	0.0192324	-0.0981227	0.032151	0.0645585	-0.0205656	-0.0405316	-0.0145441	0.0352071	0.00654153	0.00894651	-0.00495434	-0.0078319	0.000294618	-0.000351265	-0.0110366	-0.0123369	-0.00215639	-0.00471414	-0.0123182	-0.000476911	-0.00355744	0.00141637	-0.000923156	-0.00813005	0.00424359	-0.00241059	-0.00718304	-0.0029802	-0.00272207	-0.000836434	-0.00282601	-0.00539212	-0.00551457	0.00508944	-0.00229391	-0.00312719	0.00104636	-7.3833e-05	-0.00498024	0.000106524	-0.00961375	-0.00448027	0.00376477	-0.000458221
HT2-D5	-0.360722	-0.120406	0.13913	0.00810433	-0.0354737	0.0729154	0.0716826	-0.0481081	-0.0306197	-0.0110495	0.0457293	0.0260528	-0.0319684	-0.0153693	0.027333	-0.00666217	-0.0180289	0.0167819	-0.0428977	0.0150894	-0.0143768	0.0104905	-0.0112653	-0.0161505	0.0224468	-0.00909523	0.0106119	0.000182011	-0.0168678	-0.0121607	-0.00682825	0.00421344	0.0022413	0.00339953	0.00969275	0.00161919	0.00104429	0.00312624	0.00554447	-0.000253298	0.00323838	-0.000258667	-0.00341851	0.000270258	2.73733e-05	-0.000121172	-0.000433763	-0.000317411	0.00105372
HT3-D7	-0.178365	-0.0632598	0.0169387	0.0383532	-0.00151501	-0.0218825	0.0305963	0.00951381	0.0375698	0.000213164	0.00207706	-0.00949279	0.00169848	-0.0153247	0.0276187	-0.0106981	0.000975246	-0.00679087	-0.00956136	-0.0176825	0.00101427	0.003027	0.00227879	0.0111574	0.0123392	0.0143871	-0.0289633	0.00813905	0.00908889	0.000307957	-0.0194541	0.00319826	-0.00315528	0.00398676	0.00249181	0.000870322	-0.0049161	0.00699991	-0.00474986	0.00315674	0.000727625	-0.00486236	0.000292329	-0.000124509	0.00315217	-0.00177155	-0.00102889	0.00192512	0.0011128
HT5-D7	-0.142486	-0.0527312	-0.0091593	0.0304655	0.0352691	-0.0363599	-0.0130001	-0.0527465	0.0414674	0.0236165	0.0489241	-0.0165995	0.0336521	0.0207485	0.011605	-0.032265	-0.0114968	0.00392085	-0.022043	0.018667	0.00714588	-0.0138778	0.00996371	0.0142067	-0.00428082	0.00201936	-0.00467644	-0.00722017	-0.00289578	-0.000168431	0.00427932	-0.00430763	0.000615322	0.0015907	-0.000282535	-0.0037582	0.00229126	-0.0057785	-0.0116035	-0.00312962	0.000308944	0.00337452	8.62213e-05	-0.000763909	-0.00417902	0.00107653	0.000246741	0.00243063	0.000603873
HT6-D3	-0.389204	0.0436295	-0.0332838	0.0226029	-0.0301716	0.0226243	-0.0954438	0.037853	0.0735752	-0.00224911	-0.00298121	0.0181842	0.00457752	0.0136308	-0.0209404	0.0039978	-0.00216555	0.00995023	-0.0028876	0.0263832	-0.00280948	0.00231603	-0.0210009	0.0109141	-0.0153285	0.00328153	-0.00784525	0.021673	0.00457676	-0.00768631	-4.85908e-05	0.00959413	-0.00245807	-0.00381453	-0.00588497	0.00233392	0.0119205	0.00154415	0.00814416	-0.000820552	0.00368396	-0.00557091	-0.0016569	0.0032324	-0.000607315	0.0027468	0.000855845	-0.00301094	0.000654627
HT7-D5	-0.302022	-0.0830295	0.0329395	0.0421768	-0.023432	0.0174931	0.0284947	0.0340776	-0.00606312	-0.00233677	0.00740364	0.000328007	-0.0128403	-0.0138238	0.00838414	-0.000404948	-0.00528611	0.00167462	0.00335145	-0.0125507	0.0250698	0.00918263	-0.0106094	0.00769329	-0.00383195	-0.00132118	0.00585112	0.0144215	0.0219003	0.0111524	0.0158093	0.00485379	0.00312636	-0.00978414	0.00352689	-0.00315333	-0.00239665	-0.01026	-0.00581471	0.00775971	0.00481322	0.00470018	0.00232459	-0.00729523	0.00764907	-0.000732418	-0.00489572	0.0012725	0.000408745
HT7-D7	-0.373458	-0.13021	0.106764	-0.0413999	-0.0401011	0.108662	-0.0127365	-0.0902895	-0.0646151	-0.00763658	-0.00537153	0.01035	0.0102024	-0.0352126	-0.0598411	0.0142414	-0.0050146	0.021091	-0.0122484	-0.0091872	-0.0165725	-0.0176214	0.00164035	0.00590318	-0.00772228	0.0151259	0.00076421	-0.00232443	0.00803346	0.00966942	0.00559191	-0.00287901	-0.0023294	0.0037127	-0.00165319	0.000862794	0.000890817	-0.00126222	-0.00115576	0.000979024	1.1587e-05	-0.00110226	0.00203764	0.00102406	0.000449006	0.000178785	0.00104141	4.017e-05	0.000988951
HT7-H0	-0.0494697	-0.0459852	-0.0141914	-0.018579	0.0184347	-0.0107437	0.00883616	0.00726207	0.0365144	-3.35662e-05	-0.0202205	0.00333363	0.0118492	0.00907088	-0.0194306	-0.00449837	0.00934504	0.00547574	0.00083836	0.0279021	0.00299411	-0.00340115	-0.0094085	0.0125837	0.00140737	-0.00969448	0.0112876	0.00534005	-0.00147186	-0.00231739	-0.00347437	0.000328919	0.00122306	-0.00280659	0.00639967	-0.00207318	-0.00442682	-0.00238511	0.00654273	-0.00160303	-0.00278185	-0.00558602	0.00357592	-0.00310873	0.00700716	-0.00249001	0.00135275	0.0018947	-0.00296725
HT8-D3	-0.334564	-0.0958866	0.0499557	0.041999	-0.0299456	0.0377021	0.028916	0.0253325	-0.0269236	-0.00454304	0.00524968	-0.000860423	-0.0379684	-0.00270307	-0.00732719	-0.000456086	-0.00370691	-0.0186549	-0.00267467	0.00601277	0.00343987	0.00113322	-0.0048614	0.00794014	-0.00649149	-0.00984553	-0.00365664	-0.00329834	-0.000437881	-0.00854232	0.00925186	-0.0154458	-0.0112871	-0.00671066	-0.00628432	-0.0132091	-0.0104413	0.0121917	-0.0106497	0.0102946	0.000547036	-0.00143918	0.000500807	1.79863e-05	-0.00134966	-0.003061	0.0017124	-0.00332633	-0.00296355
HT8-D5	-0.387075	-0.100045	0.0740973	0.0408383	-0.0451733	0.0602017	0.00823154	0.0203187	-0.0482134	-0.00359006	-0.00711107	-0.0346935	-0.0453787	0.0437613	-0.0181301	0.016002	0.0161643	-0.0476953	0.0280595	0.0257434	0.0125207	0.000305934	0.00848309	0.00683696	-0.00488379	0.00348745	-0.00464196	-0.0107718	-0.00597098	-0.000552859	-0.00498268	-0.003508	0.00501673	0.00276677	-0.00366932	0.0080943	0.00528074	-0.0076815	0.00224443	-0.00674092	-0.0020259	0.00137548	-0.00044936	0.00163243	-0.00153482	0.00251929	0.000897424	0.000164567	0.000939158
HT8-D7	-0.199164	-0.0470478	0.00426335	0.0346431	-0.00731625	-0.0118827	0.00750024	0.0232256	0.0472005	-0.00356338	0.00726198	-0.00386858	0.0157307	-0.0197922	0.0229587	-0.0147768	0.00189863	-0.000952055	-0.0135229	-0.0175047	-0.00361829	-0.00667379	0.00786821	-0.00594164	-0.00740314	0.000348055	0.0220144	-0.00565097	-0.00177531	-0.00428007	0.00178765	-0.000173896	0.00501722	-0.00293941	0.00031392	0.00681013	0.00802212	0.0038663	-0.00155894	-0.00180106	0.00515855	0.00559998	9.67932e-05	0.00819232	5.93539e-05	0.00164763	0.00543168	-0.00297206	-0.0021625
HT9-D3	-0.396668	-0.00211215	-0.00116875	0.0346233	-0.0404582	0.0199854	-0.0945163	0.0325669	0.0603751	-0.0225664	-0.042715	-0.0206182	0.0366983	0.00315029	0.0101161	-0.00371788	-0.00733516	-0.00425261	0.000388781	-0.0203593	-0.00906815	0.00494099	-0.000420802	-0.0143509	0.00790689	-0.000740988	0.001223	0.00111014	-0.000715233	0.000179837	-0.00103397	0.00574294	0.0030837	0.00242754	0.00127957	0.00197729	-6.00154e-05	0.00729853	-0.00668703	0.000379616	-0.000792502	0.000648378	0.000563095	0.00202181	4.98695e-05	0.00731641	0.00275511	0.000130037	0.000843958
P10	-0.011158	-0.0968277	0.0235802	-0.0769336	0.0976938	-0.0181593	-0.0257215	0.00447287	-0.00280258	-0.0206023	0.0210777	-0.0708329	0.0381718	-0.00345694	0.00329457	-0.00692141	-0.00907887	-0.00276506	-0.0135669	-0.0276617	-0.0191724	0.00284304	-0.00995768	0.00389307	0.00421976	-0.0175687	-0.0114957	-0.00586764	-0.00595784	0.00191471	0.00574558	-0.00539363	0.00322549	-0.00274508	0.00392911	0.00670278	-0.00535614	-0.00747546	0.00511115	-0.00217078	-0.0023999	-0.000146974	0.00115033	-0.000181255	0.0019781	0.00379257	0.00191809	-0.00314029	-0.00207144
P3	0.0634684	-0.0581817	0.0531728	-0.00489865	-0.0043985	-0.0148628	-0.0182717	0.01276	-0.00924103	-0.0247956	-0.0362903	0.0122289	0.0232532	-0.036968	-0.00204811	0.00398066	0.0296529	0.000606372	0.00315584	-0.00586553	0.00931821	-0.00956171	-0.00807277	-0.00319706	-0.00279888	0.012668	0.00445963	-0.0011409	-0.0102306	-0.000618724	0.0128713	-0.00410536	0.00271861	-0.00243448	0.00882652	0.00282958	-0.00466456	0.000251238	0.00216232	0.00403819	-0.00944861	0.00367327	-0.00162506	0.00382798	0.000318341	0.00214499	-0.000456271	0.00509517	0.00492076
HC12-D7	-0.0307119	-0.0687666	0.00697705	-0.00143437	0.0151203	-0.016375	0.00950963	0.00396039	0.0225719	-0.00883074	-0.0333536	-0.0139884	0.00872834	0.0135848	-0.0103505	0.00525843	0.0139223	-0.00499666	0.000261128	0.00799704	0.00412725	-0.00260542	0.00689835	-0.00937033	0.0167437	-0.00901873	0.0210915	-0.00330994	0.00153777	-0.000805438	-0.000600876	0.000455381	-0.00903599	0.00747066	0.00395961	0.00136287	0.00209541	0.000642663	-0.00817041	-0.00066352	0.00105915	-0.00485623	0.00952444	0.00518772	-0.00620239	0.00478627	-0.00305072	-0.00245758	-0.000917433
HC13-D3	0.124722	-0.0329082	0.0819317	0.0461003	0.000227089	0.0371507	-0.010861	-0.0542414	0.0449992	0.0161834	-0.0173064	-0.0391621	-0.00797542	0.00987019	0.0218556	0.000945646	-0.00950176	0.00570276	-0.0221474	0.00531231	0.011098	-0.00929652	-0.0101209	-0.0367963	-0.0066607	0.000414916	0.00782213	0.00417177	-0.00661608	0.00490855	0.00510488	0.000392778	-0.0116478	-0.00791235	-0.00562175	-0.0014829	-0.0108449	0.000661571	0.0063291	0.000142268	0.000115458	0.000911253	0.00381045	-0.00211456	0.000599176	-0.000256326	0.00148552	-0.00112297	-0.000771769
HC3-D7	0.0345039	-0.0887435	0.0212933	0.0302443	-0.0256991	-0.0243405	-0.0115842	0.00429145	-0.0179115	-0.013449	-0.00424468	0.00936819	0.0121671	0.0206036	0.0108839	0.0301987	-0.0178993	0.00330629	0.0193612	-0.020031	8.82341e-05	-0.0108458	-0.000790026	-0.00172991	-0.00244401	0.00907554	0.0058104	0.00090871	-8.48963e-05	-0.00918185	-0.00604064	0.00104206	0.0119679	-0.00892238	-0.0111984	0.00830819	-0.00339749	0.00126458	-0.00332166	0.00411306	0.00448388	0.00746992	0.00108147	0.00795947	-0.00161529	-0.000908952	0.00610867	-0.00177687	-0.000405398
HC6-D7	0.160616	-0.0404001	0.0718732	-0.0726166	0.0811174	0.00424222	-0.0320611	0.0471745	0.0385348	-0.038251	0.00745345	-0.0364847	-0.0109683	0.0136696	-0.0012726	0.0215385	-0.00906734	0.02949	0.00596227	0.00146404	0.0184363	0.00286823	-0.0179983	0.0191198	-0.0137944	0.00626966	0.00910191	-0.00841178	-0.00798848	-0.00555787	-0.0120316	-0.0023371	0.004179	0.000296939	0.000775328	-0.00894098	0.00276647	0.0073135	-0.00071808	-0.00541582	0.0027335	0.00074411	-0.00414075	-0.00184215	0.00157496	-0.00117236	-0.00136752	9.59833e-05	-0.001346
HC8-D5	0.0593057	-0.056434	0.0317754	0.0560003	-0.0135488	-0.0160085	-0.032971	0.014818	-0.000908627	-0.0117938	0.00511416	-0.00583712	0.00507706	0.00844379	-0.00136866	-0.0102264	-0.00555129	0.0120537	0.0172628	-0.0086319	-0.0130618	0.00560883	0.000776747	0.000145207	-0.00585115	-0.00352324	-0.00164552	-0.0169561	-0.00355931	0.0038018	0.00183781	-0.00574629	-0.00130479	-8.42021e-05	-0.00082024	0.00669836	-0.00853474	-0.00228771	0.000598338	-0.00189018	-0.00204858	-0.00583277	0.00599416	-0.0101898	-0.00352198	-0.00159099	0.00130816	-0.00188177	0.00494
HT12-D7	-0.202914	0.0320108	0.0139138	-0.0425537	-0.0358665	-0.0777281	0.0118412	0.0210673	0.0145826	0.105378	0.036902	0.0449884	0.0199205	-0.0310494	-0.00593628	0.00880992	-0.00786916	0.00738556	0.00229181	0.000164713	0.00967423	0.0304641	0.0175979	-0.011061	-0.00940791	-0.0158242	0.00600771	0.0035144	-0.00511764	-0.00474534	-0.00213927	-0.0045774	0.0032573	0.00421132	0.00459443	0.00177778	-0.00485311	-0.00279951	-0.0027524	-0.00243163	-0.00310687	0.000380397	0.00173428	-0.00259392	0.000781821	-0.000507641	0.000500754	-0.0014901	-0.00179664
HT12-H0	-0.0276343	-0.0816043	-0.0221045	-0.0425025	0.00174069	-0.00924746	0.0121352	0.00401577	0.0293325	-0.0064373	-0.0316973	0.00776876	0.0244709	0.0350296	0.0203552	0.0136987	-0.00731342	-0.0276407	-0.010146	0.00377507	-0.0138275	-0.00266334	0.00353117	-0.000645075	0.0037889	-0.00213544	0.0155611	-0.00453643	0.00447747	-0.00428098	-0.00366209	-0.0143171	-0.00489078	-0.0011846	-0.00520306	0.0018489	-0.00400234	-0.0024838	-4.25747e-05	0.00710057	-0.00368122	-0.000965728	-0.00521111	-0.00356422	0.00148784	-0.00142251	-0.00239993	0.000946957	-0.00121933
HT14-D7	0.159463	0.0737989	-0.0260835	0.149478	0.009916	-0.0196019	-0.0508175	0.031071	-0.0483741	0.0725282	0.0131949	-0.0229996	-0.00345529	0.0139743	0.0245149	0.00366209	0.0349239	-0.0250411	-0.0198044	0.00896031	-0.00376966	3.02904e-05	-0.00330434	-0.0201528	-0.00587442	-0.0083576	-0.00711354	0.012096	0.00717278	-0.0060229	0.00653268	-0.00798811	0.00389079	-0.00649505	-0.0091663	-0.00361258	-0.00274394	0.00270239	0.00143834	-0.00398218	0.00689389	-0.00306001	0.00768856	-0.00101455	0.00232242	0.00473337	-0.00327605	-0.0017307	0.000111223
HT6-H0	0.077849	-0.0510817	-0.130959	-0.0389609	-0.0806896	-0.0661078	0.00166643	0.00293855	0.00795011	-0.0271439	0.00350679	0.0125111	-0.0189912	0.00255411	-0.0134645	0.0049339	-0.00701624	-0.00200959	0.000763161	-0.0051221	0.00342756	0.0112008	0.00503634	0.00464526	-0.00503346	0.0165349	0.00783678	0.00311758	-0.0106491	0.00557496	0.0006953	0.0137295	0.00135594	-0.0166267	-0.002811	-0.00872911	-0.0112446	-0.00583034	0.000650524	-0.00699293	-0.00663367	0.00104167	0.00890937	0.00651151	0.000145885	0.0013259	0.00201448	0.000252981	-0.00508286
HT9-D5	-0.239669	-0.0894231	0.0157755	0.034764	-0.015197	0.0029919	0.0133244	0.0365968	-0.0161577	0.0293148	0.0384423	-0.0158812	-0.00255298	0.0206017	0.0217907	-0.00327331	-0.0123568	0.0294215	-0.00326088	-0.0166356	0.0105404	0.014895	0.00510919	-0.0157754	0.0010136	0.000920096	0.0140989	0.00381706	0.00948702	0.0156391	-0.00129277	-0.00201074	0.00135915	0.0113528	-0.00571946	-0.00630536	0.0078443	0.000434468	0.00483334	-0.00567847	-0.0036633	-0.00377053	-0.00279294	0.00227518	0.00196165	-0.000668006	0.00108171	0.00151585	0.000452326
P1	0.0334832	-0.0676583	0.115775	0.00642853	-0.0300425	-0.0844138	-0.0214095	-0.00201466	-0.031924	0.0180134	-0.0444604	0.00149772	0.0226244	-0.0530653	-0.01477	0.0428584	0.0244224	0.0101689	-0.0116594	-0.0114245	-0.00962179	0.0346349	0.0244398	-0.00064675	-0.00785825	-0.0142437	-0.00458934	0.0239461	-0.00520936	-0.00966761	-0.011872	0.00295157	0.00741418	0.00260918	-0.00190883	-0.00472327	-0.000888193	-0.00544646	-0.00142583	0.00247452	0.00549141	0.0029656	0.00107708	-0.0023546	-0.0019565	-0.00209862	-3.69914e-05	-0.00191334	-0.00141343
P6	0.085241	-0.0577486	0.011126	0.00580224	-0.00667941	0.000938164	-0.019248	0.0128778	0.0115702	-0.0214146	-0.0210651	0.0256113	0.00834673	0.0133774	0.00603544	0.0114552	-0.00750581	-0.0119967	-0.00715802	-0.00660405	0.0147425	-0.0185103	0.0129247	0.010593	-0.00568208	-0.00910037	-0.00834225	0.00534186	-0.00888439	-0.0135039	0.00230176	-0.00208631	-0.0123565	0.000788467	0.00882095	-5.25514e-05	0.00588872	-0.0109059	0.0012996	-0.00642833	0.00328617	0.00235493	-0.0024585	-0.0043195	0.00387729	0.000544292	0.00189306	-0.000833741	0.00184048
HC14-D5	-0.00282324	-0.0470994	0.00870606	0.041062	-0.000149095	-0.0389592	-0.0155666	0.00375491	0.0172956	-0.00608809	0.00301614	-0.00835967	0.000237047	0.0223638	0.00324586	0.0219249	-0.002444	0.0139981	-0.00321302	0.0213731	0.00456281	-0.00396724	-0.00336442	-0.00560064	-0.00413308	0.00602139	0.00132411	-0.0117987	-0.00851191	0.00973759	5.14521e-05	-0.00216048	-0.0128524	-0.00310794	0.00313044	-0.00135197	0.00674223	0.0123369	0.00331614	0.007123	-0.00133696	0.0115906	0.000522343	-0.00294195	-0.00119684	-0.00578176	-0.00252503	-0.00231147	-0.0070688
HC15-D3	0.122504	0.000246372	0.0196506	0.0408068	0.00150774	0.00774012	-0.0258881	-0.00336423	0.0167984	0.0296546	0.0157975	-0.00477525	-0.0282598	0.00951011	-0.0105143	-0.00103309	0.00180375	0.00917857	0.00152424	-0.00298579	-0.0110567	-0.00371977	0.00283237	-0.0110662	-0.00631492	0.00789859	-0.0113025	0.00562824	0.0093	-0.0112198	0.00491413	-0.00202788	0.00464582	-0.00625907	0.00651389	0.00485946	0.00616349	0.000943834	0.00492893	0.00782245	-0.0136253	-0.00347427	0.000863047	0.000675827	0.00310792	-0.00401569	0.000456693	-0.00345306	0.00241684
HC2-D5	0.158823	0.0345258	0.0148655	0.0511156	-0.00035905	0.0325786	0.000212276	0.00104586	0.0166107	0.0198428	0.00154336	0.00206221	-0.00905721	-0.0171804	-0.0267108	0.00670986	0.0074778	-0.0132009	0.00219326	-0.0014995	-0.00349449	-0.00571574	0.0100985	-0.000337877	0.00180715	0.0053858	0.00610723	-0.00297152	-0.00105124	0.00250703	-0.00390209	0.0093848	-0.0114784	0.000717211	-0.00210436	0.00942208	-0.00529265	-0.00498549	0.00263996	0.000938588	0.0115084	0.00620387	0.000427686	-0.00826961	0.0050057	0.000838678	0.00429832	0.00739446	-0.000878379
HC3-H0	0.0721841	-0.0345996	0.0208839	0.00418471	0.00463577	-0.000587467	-0.0215048	0.0146457	0.0148593	-0.0232202	-0.018223	0.0185264	-0.00658151	-0.0094726	-0.00993868	-0.0101872	0.0111259	-0.000958072	-0.00618139	0.014177	0.0103469	0.00303592	0.00168189	0.019049	-0.00356493	0.00169325	-0.000420122	0.00289491	-0.00195226	-0.00729735	0.000435802	-0.00613249	0.00804459	-0.000504935	-0.0119668	0.00492845	-0.0045887	0.00435411	0.00313152	-0.00910634	0.00915273	-0.00451846	0.00118324	-0.00113508	0.000535794	-0.00265066	-0.000986481	-0.00399659	0.00234016
HC8-D3	0.0833675	-0.058831	0.0278128	0.0271151	0.00371145	-0.00328975	-0.0321905	0.0243411	-0.00525835	-0.00954301	-0.011294	0.00192862	0.0110628	0.012189	-0.00916299	-0.020412	0.0104905	0.00450765	0.00808904	-0.00965425	0.00200532	-0.000754352	0.00141681	-0.0046753	0.00271972	-0.00397776	-0.00475006	0.00540287	-0.00633187	-0.00608289	0.00680701	-0.0128719	-0.00685797	0.0063906	0.00425868	-0.00711149	0.00316854	-0.0103574	-0.00708575	-0.0058263	-0.00427788	-0.00569475	0.000474734	0.00141077	-0.00477582	-0.00840319	0.00148767	0.00311493	-0.00195657
HC9-D7	0.133466	-0.0267198	0.0584783	-0.0128103	-0.0333379	0.0184673	-0.019247	-0.0313995	0.0223026	0.038999	-0.012727	0.0103959	-0.00422718	0.00186028	0.02597	0.0364029	-0.0146498	0.0174449	0.00017746	0.00957406	-0.00995052	-0.0359058	-0.0137472	0.00704548	-0.0172778	-0.00411681	0.00168357	0.0057232	-0.00301425	-0.00840311	0.00233702	0.0126421	0.00328646	0.0107557	0.000130223	7.02583e-05	-0.00359835	0.00161171	-0.00358858	-0.00333554	0.00119601	-0.00314775	-0.00175034	-0.00122518	-0.00138551	0.00101603	-0.000114561	0.00365469	-0.00116706
HC9-H0	-0.0755009	0.00807537	-0.0561836	-0.00562585	0.0277735	-0.0174782	0.0308412	-0.0280724	0.000643149	0.0126669	0.0159153	-0.00668596	0.0226422	0.0224069	-0.0448593	-0.00741945	-0.00590079	0.00932203	0.0178936	-0.00363225	-0.0067524	-0.00343132	0.00141833	-0.0091267	-7.97927e-05	-0.0156428	-0.00929947	-0.00645649	-0.00660385	-0.0085082	-0.00538405	0.0123539	0.00402858	0.00591446	-0.00515758	-0.0136983	-0.00405081	0.00642166	0.00395153	0.000243264	-0.00235199	-0.000198785	-0.00148563	-0.00264251	0.00482092	0.001993	0.00207679	0.0019109	-0.00280485
HT15-D7	0.0845298	0.0521851	-0.0360768	0.101496	-0.00728112	-0.0419778	-0.0370263	0.0270174	-0.0392758	0.0136917	0.0189355	-0.00226845	0.00359336	-0.0047468	0.0208942	-0.00739887	0.00305905	-0.0102828	0.01216	-0.00336613	-0.0233249	0.0269793	-0.0254298	0.0229215	0.0106437	-0.0115862	0.00538022	-0.00149325	0.00456023	-0.00089904	0.00634125	0.00716837	-0.00897416	-0.000389788	-0.00132292	-0.00269313	-0.00218729	-0.00499083	-0.00192637	-0.00225188	-0.00305194	0.0030152	-0.00324926	0.0015819	0.00256234	-0.00235047	0.00258547	0.00228391	-0.00140021
HT2-H0	0.0824928	-0.0665603	-0.161497	-0.0933525	-0.126769	-0.0971894	0.00494027	-0.0166141	-0.00688239	-0.00876475	-0.0219664	0.00632694	-0.0162854	-0.0188695	-0.011151	0.00831454	0.0334423	0.0261575	-0.00718406	0.00705132	0.010919	0.00022279	-0.0100712	-0.0015506	0.000928097	-0.0228394	-0.00891748	-0.00806605	-0.00061561	0.00119704	-0.00438143	-0.00547594	-0.00324961	0.0068919	0.00335601	0.00377072	0.000803662	0.00536972	-0.0042948	0.00406587	0.00300793	0.00204994	-0.00452747	-0.00347083	-0.000713579	0.00027292	0.000425013	-0.000247031	0.00285492
P2	0.231954	0.0699048	0.0149222	-0.00335863	0.0643776	0.0514112	0.00687664	-0.0115902	-0.0354852	-0.0100887	0.0176469	-0.00631249	0.0287281	-0.0161081	-0.00554938	-0.0114604	-0.00554507	0.022888	-0.00509354	0.0172008	0.00540291	0.0109379	-0.0165699	-0.0203154	0.0287474	0.00743208	-0.0115352	-0.0061844	-0.00515438	0.000121997	-0.00963882	-0.00712127	-0.000545987	-0.000906211	-0.001917	-0.00429941	0.00580835	-0.00844633	0.00316109	-0.00365684	0.00339295	0.00504057	0.00255098	-0.0015471	-0.00197718	0.00551251	-0.00205728	0.00134585	0.00032518
P7	-0.153914	-0.139513	0.047957	-0.0507515	0.0325991	0.0579568	0.083976	0.0151045	-0.0210213	0.00426169	-0.0117749	0.0170122	-0.00125798	-0.00675261	-0.0108065	-0.0425938	0.0105491	-0.0151977	0.00743779	0.000118542	0.0134215	0.0266491	0.00469499	-0.00668127	-0.021861	-0.00356258	0.00350383	0.00559857	-0.00553359	-0.00151899	-0.00120987	-0.00721235	-0.0055641	0.00011198	-0.00682495	0.00878855	0.00411933	0.0025922	-0.00140713	-0.00629238	-0.00451924	0.00236519	0.00297135	0.000853851	-0.00363909	0.00240093	-0.000141388	0.00286633	-0.00196194
P9	0.0012469	-0.0870017	0.0540406	0.0266893	-0.0192686	-0.03901	0.0100444	-0.0145591	-0.02176	-0.00632499	-0.00737785	-0.0161117	-0.00133143	-0.01422	-0.00276574	0.0234705	0.00416486	0.0106275	0.0169946	0.00622933	0.013819	-0.00217346	-0.0156784	-0.0044314	0.00780001	0.0246178	-0.00610569	0.00918367	0.0125697	0.0104895	-0.00851205	-0.012113	-0.0121689	0.00878902	-0.000500302	0.00509148	0.000313868	0.00309018	-0.000837777	-0.00143545	-0.00170769	0.000220459	-0.00311277	0.00463686	0.00155867	-0.00128229	0.0011254	0.00146419	-0.000874717
P5	0.195926	0.0437009	0.00121974	0.0957659	0.013963	0.0228499	-0.0362898	-0.0549658	-0.0371672	0.0550564	0.0597027	-0.0130043	0.0305009	0.00534042	-0.0146751	0.00702614	-0.00861061	-0.00906755	-0.0250158	-0.0352348	0.00708805	-0.0173376	-0.0159185	0.0143857	-0.0122135	0.00576772	0.000470849	0.00154552	-0.00493064	0.00533948	-0.0137824	0.00089811	-0.00400792	-0.00618992	0.00247944	0.0101563	0.00187796	0.00320044	-0.00375865	0.00599343	0.000629005	-0.0024782	-4.72239e-05	0.000478146	-0.00093705	-0.000894262	0.000393793	0.00027907	-0.00143865
HC15-D5	0.347728	0.00203773	-0.104819	-0.025134	-0.116992	0.0523683	0.033564	-0.012952	0.0211681	-0.00979383	-0.00340711	-0.00501845	0.00368501	0.00624988	-0.025796	-0.0061923	0.0172011	-0.0144663	-0.0133794	-0.0132137	0.0273463	-0.00497404	-0.0178208	-0.00522095	0.00384018	-0.0187637	0.000364095	-0.0055548	-0.0120167	0.00931069	-0.00479265	0.0107009	-0.00522505	0.0101026	-0.00813035	0.00530789	0.00442433	0.000554251	-0.00639959	-0.000463576	0.000731809	0.00139052	-0.000329723	-0.00475186	0.00160641	0.000418528	-0.00456122	-0.0032368	0.000990186
HC7-D3	0.113929	-0.0089933	0.0208611	0.0232734	-0.00535961	0.00390312	-0.0263162	0.00230412	0.00748287	0.0197574	0.0143486	0.00796939	-0.0105918	-0.00379172	-0.0101625	0.000385921	-0.00392826	0.0137325	0.0148226	0.0183436	-0.00662646	-0.00761762	0.0121657	0.00298684	0.0111582	0.00157312	-0.00957163	0.00834645	0.00504094	0.00387207	0.0126526	-0.0021173	0.016784	-0.00368754	0.00425132	0.000189913	0.0111786	0.0069032	0.00401561	-0.00400178	0.00108518	0.0012932	0.00946225	-0.00193227	0.00434981	0.000905948	-4.95061e-05	-0.000116012	-0.00169758
HT3-D3	-0.338211	0.0728584	-0.0446672	0.0167214	-0.0218749	0.0347037	-0.0435851	0.0173416	0.0415212	0.00664876	0.029953	0.0235925	-0.0373706	0.0128774	-0.0382538	0.0225634	0.0238363	-0.0137557	-0.0137426	-0.00696404	-0.00168835	-0.00249908	0.00742266	0.00268819	0.0144535	0.0087735	-0.00375994	-0.0144372	0.00395509	0.00736527	0.00143903	-0.000368692	0.0019719	0.00369086	0.01526	-0.000336616	-0.0090299	-0.00126979	0.00252123	0.00149459	-0.000630758	0.00561162	0.00055322	0.00163057	-9.56489e-05	0.000771112	-0.000170315	0.000419424	-0.000286597
P4	0.0966937	-0.0520917	0.0620242	0.0813753	-0.018737	0.018012	-0.0190585	0.0161804	0.00432093	-0.0158311	-0.00890028	-0.0101198	0.0143816	-0.0387743	0.0104879	-0.00567258	0.0040555	-0.0311385	0.011302	-0.00825316	-0.0124794	0.00840613	0.00847696	-0.000442058	0.00248938	-0.00339279	0.000909103	0.000921138	0.00643636	-0.00496831	-0.000632091	0.00755422	-0.0113306	0.00128994	0.00237	0.000749356	0.00895105	-0.000456744	0.00418861	0.00372242	0.00130996	0.00554371	-0.00420497	0.000263345	-0.00516565	0.00408382	0.00292244	-0.00094667	-0.00337592
HC5-D7	0.0710518	-0.051834	0.015021	0.000319437	0.0303864	-0.0177884	-0.0411642	-0.00334503	-0.0192635	-0.00361418	0.00222138	0.0122983	0.00405255	0.0146788	-0.0151056	-0.0126876	0.0188243	0.0188466	-0.0172705	0.00447742	0.00108896	0.0149026	-0.00652355	0.0175929	0.00227652	0.0100261	0.00852185	0.00732517	-0.0148595	-0.0129822	-0.00302227	0.0011409	-0.00576296	-0.00594832	-5.70719e-05	0.001625	0.000164157	-0.00325977	0.0101974	0.00624147	0.000951297	0.00661843	-0.00712554	0.00305219	0.00252566	0.000991716	-0.00539123	-0.00523065	0.00359898
HT15-H0	0.114172	-0.0512883	0.0724741	0.06208	-0.0153259	0.026216	-0.0284126	-0.0208753	-0.00350157	-0.00906634	0.00296796	-0.00730412	0.032189	-0.0484781	0.00714613	-0.00658545	-0.00568076	-0.0215035	0.00939503	0.00427989	-0.0161547	-0.0131003	0.000566978	-0.00280778	0.0159622	0.00210243	0.0080479	0.0037222	0.00258769	0.0064789	0.0019515	0.000367627	0.00399513	-0.0097274	0.00243274	-0.00128914	0.0051157	0.00740215	0.000165884	-0.00448835	0.0012993	-0.000232446	-0.00098435	-0.00219281	0.00432578	-9.31542e-05	-0.00412639	-0.00440339	0.00290637
HT4-D7	-0.0901655	0.0140951	-0.0369749	0.0402213	0.00941521	-0.0459277	0.0205828	0.00751082	0.0388367	0.00271584	0.0299942	0.00508122	0.00185364	0.00895576	-0.0262528	0.0219261	0.0114849	-0.0305819	0.0029075	0.00306674	0.0108894	0.00472419	-0.0173992	-0.0137196	-0.00302939	-0.0010418	0.01395	0.00411245	0.000588671	0.00176475	-0.00165727	-0.00257709	0.00183715	-0.00236458	0.0143273	0.00224877	0.00417472	0.00274953	0.0044659	-0.00343363	-0.00157226	-0.000705406	-0.00203118	-0.00489392	-0.00380936	0.00115149	0.0023619	0.00329956	0.00294656
HT5-D3	-0.351123	0.124298	-0.0764487	0.0275759	-0.0129826	0.0311648	-0.0114568	0.0213327	-0.0204696	-0.0113861	-0.0142541	-0.00570735	-0.0142268	-0.00263699	-0.01374	0.0041311	-0.00893022	0.00628313	0.00216632	-0.00811598	-0.0113508	-0.00128996	0.00462333	-0.00572317	-0.00786927	0.0022729	-0.00511609	0.00240158	-0.00276638	0.0060212	-0.00234892	-0.000697281	-0.0077164	0.00998023	-0.00253379	0.000353508	-0.000227668	0.00633269	0.00124515	-0.00589191	-0.00337285	-0.00390921	-0.0070201	-0.00356513	-0.000130154	0.00111128	-0.00217643	-0.00334903	-3.23225e-05
HC11-D3	-0.0517007	-0.05701	0.0112171	-0.0808415	0.00934068	-0.023398	-0.002637	0.00712811	0.00508315	0.036957	-0.0238858	0.00934293	0.0314121	0.0118729	0.0119666	-0.00748633	0.00286422	0.0115349	-0.0108543	0.0154957	-0.0179445	-0.00174869	0.0063818	0.0112202	-0.0197655	0.000144035	-0.0182371	-0.0141214	0.000527293	0.0170268	-0.00919326	-0.00580324	-0.00146179	-0.00147378	0.00385831	-0.00983429	0.00164849	-0.00849286	-0.0018369	0.00270772	0.0086945	0.00302874	0.00307	0.00715285	-0.000647033	0.000172639	0.000474516	-0.0010908	0.00089602
HC13-H0	0.191957	-0.128106	-0.0432451	-0.0551679	-0.100644	-0.00211832	-0.0483655	0.00352936	0.00442274	-0.00571017	-0.0173634	-0.00611314	0.00259385	-0.00419437	0.0149974	-0.0511768	0.00822853	-0.0147619	-0.00602663	0.02228	-0.00769989	-0.0220917	0.0141365	-0.0100773	-0.00884353	-0.0118688	0.00258491	0.00517999	0.00548386	0.0105572	0.00320229	-0.00346725	0.00259041	0.00298018	0.00489941	0.000397474	0.00189365	0.000551311	0.00246655	-0.00194174	0.00183332	0.00199618	-0.00582932	0.00168539	0.00242043	-0.00165516	-0.00249787	0.001819	-0.0013964
HT3-D5	-0.258676	-0.0594325	0.0513375	-0.00810795	-0.0410078	-0.0232202	0.0168236	0.0087459	-0.00764838	0.0340947	0.00546157	-0.00820746	0.0165668	-0.0305097	0.064769	0.0124317	0.0506463	-0.00309874	0.0297856	0.00891926	0.0241506	-0.023826	-0.00270873	0.0159293	0.00484954	0.00492751	-0.00427176	-0.0312716	0.00108878	-0.00777494	0.000108399	0.0121698	0.0063416	-0.00484729	0.000933737	0.00440416	-0.00112725	-0.00406068	0.00777648	-0.00177704	-0.00231441	-0.00470312	-0.000631448	0.000641871	-0.00539744	-9.40902e-05	-0.000537216	0.000439223	-0.0014698
HC4-D5	0.0258014	0.0146245	-0.0394712	-0.0444763	0.0241598	-0.0515552	0.0087117	0.00606865	-0.046989	0.00043648	-0.0250559	0.0134066	0.0231963	0.00110991	0.00238024	0.0215828	0.00994763	0.0198114	-0.00376293	-0.0059805	0.000921035	0.00165843	-0.0209108	3.91207e-05	-0.013127	-0.00812257	0.000762763	0.00165892	0.0112588	0.0185363	0.000829361	0.0017701	0.000130388	0.00454492	0.00487469	-0.00706361	0.000641684	-0.00280672	0.00909934	0.00533895	0.000851693	-0.00676217	0.00715798	-0.000597814	-0.0112169	0.0015762	0.00390785	0.000133349	0.00176181
HC1-D3	0.071922	0.0164564	0.037516	-0.147791	0.142686	0.026528	0.0500293	0.0293827	0.114426	0.012084	0.0085718	-0.0634301	-0.0456513	-0.0199777	-0.00761931	0.00485087	0.0178713	-0.00138492	-0.00865404	-0.0222505	-0.00464602	-0.000250875	0.0118681	0.0157676	-0.00247529	0.00640997	0.00902392	0.0012685	0.00895721	0.00292004	-0.0077784	-0.00567042	0.00505064	0.000414351	0.000332989	-0.00490913	0.000919081	-0.00021957	-0.00331233	0.00239204	0.000220122	-0.00184055	-0.0034822	0.00132993	-0.000912176	-0.000221678	-0.00133558	0.000498174	0.000798975
HC15-D7	0.103382	-0.0886239	0.0602315	0.00146501	0.0397377	0.0112326	-0.040745	-0.028003	-0.0295567	-0.0289465	-0.00639985	0.0103837	0.0163799	0.00377146	0.00953408	-0.0162767	8.78785e-05	-0.00732554	-0.0164531	-0.00964052	0.0111174	0.00136461	0.0118892	-0.0112944	0.00977049	0.00142872	0.00522593	-0.0141717	0.00745273	0.00693481	-0.00357936	0.0053619	0.0153243	0.00234592	-0.00307469	-0.00778799	0.00409833	0.01037	-0.0094038	0.00473936	0.00398642	-0.00166308	0.00593866	0.00071543	0.000284171	-0.00140133	0.00132456	0.00246133	-0.00030123
HC9-D3	0.0981793	-0.0408534	0.0273679	-0.0150901	0.0539781	0.00306232	-0.046725	-0.0430282	0.000863151	-0.0167899	0.0104864	0.0150251	-0.00100929	-0.000913899	-0.0132817	-0.0120707	0.000241405	0.00773051	-0.0284068	0.0223139	0.0148947	-0.00188818	-0.00486275	-0.00202811	-0.0133143	-0.00318894	8.70281e-05	0.00305992	0.0232244	0.00308272	0.00551544	0.0116169	-0.00285175	0.00413969	0.00125772	0.00571315	0.00696848	-0.00257911	-0.00764326	-0.00870387	-0.00352803	-0.00200552	-0.00260485	-0.00143578	-0.00133601	-0.000618381	0.00276645	-0.00407777	-0.000371364
HT2-D7	0.0824486	0.0382081	-0.0142697	0.0714017	-0.0149419	-0.0188966	-0.0199105	0.00435751	0.0088641	-0.00309246	0.0186889	0.0134897	-0.0296742	-0.0188032	0.0244733	0.00791756	-0.00181333	-0.0309449	-0.00654408	0.0105571	0.0100713	-0.00570516	-0.00334479	0.00866897	0.0103212	-0.0108298	-0.00990672	-0.000774295	-0.018994	0.00764503	-0.00251157	-0.00543453	0.0112699	0.00846863	-0.00546337	-0.0130366	0.00725479	-0.00504774	-0.000565325	0.009839	-0.00941106	0.00163274	0.000158034	-0.00109757	-0.00200628	-0.000961286	0.00174757	-0.0013788	0.00284208
HC4-D7	0.0913268	0.000599754	-0.030445	-0.0516554	0.0217051	-0.03564	-0.0145901	0.0203187	-0.0359109	-0.00690738	-0.00593006	0.0283016	0.00636276	-0.0133682	0.000122482	0.0312421	0.0153228	-0.0112217	0.000329602	-0.00210355	0.0136879	-0.0227038	-0.00236183	-0.0136867	-0.00609189	0.0117519	-0.0102057	-0.00554009	-0.000738082	-0.00570247	-0.0028744	-0.00430166	0.00701579	0.0032684	-0.0183704	0.000938216	0.00737964	-0.00144693	-0.00584048	-0.00305173	-0.008373	0.00414973	-0.00285775	-0.000964695	0.00763772	0.000811796	-0.00246801	-0.00299096	-0.00261463
HC13-D5	-0.0704276	-0.0437173	-0.019788	-0.0850575	0.0599062	-0.00190942	-0.00933362	0.031499	0.0193103	0.0185196	0.0097311	0.00136751	-0.0137927	-0.00934752	0.0172283	3.80229e-05	0.000475909	0.0196983	0.0116236	0.0332797	-0.0161432	0.0213081	-0.00443735	-0.00932837	0.0144879	0.0147968	-0.0166164	-0.00421377	0.00368819	0.000430803	0.00695728	0.00232148	-0.01312	-4.30873e-05	-0.0123039	0.00414027	-0.000278202	-0.00899949	-0.00799756	-0.000767177	-0.00124962	0.00262032	-0.0006628	0.00274137	-0.000260769	-0.000653674	-0.000674159	-0.00243842	-0.00166732
HC1-H0	0.120645	0.0237018	-0.0137398	-0.0325849	0.080721	-0.0258261	-0.0216347	0.036935	-0.027814	-0.0215425	0.00461077	-0.0269447	-0.0236626	-0.00262037	-0.00470848	0.00937699	-0.00503316	0.00907026	0.00601005	-0.00605268	0.0143972	-0.0108594	0.0157869	-0.0105447	-0.00636628	0.00529755	-0.00567584	0.00698641	-0.0150708	0.00309918	0.00415995	-0.000122861	0.00152927	-0.00411511	0.00023425	0.00935037	-0.00848579	0.00160761	-0.00111439	0.00375597	0.00586936	-0.0105665	-0.00563391	-0.00158363	0.00349866	0.00378718	-0.00118798	0.00322218	-0.000382136
HC3-D3	0.115143	0.0489046	0.0292386	-0.0933121	0.00375624	0.0798953	0.0192036	-0.0663058	0.0439669	0.0709664	-0.0253678	0.0418095	-0.0478255	-0.0142479	0.0530443	-0.0151483	0.0205106	-0.0116698	0.00793304	-0.0205695	0.000164262	-0.00166461	-0.00455955	-0.00258415	-0.00949997	0.00281879	-0.00129131	-0.00372764	-0.00139817	0.00694717	0.00400435	-0.00635395	-0.0107831	6.39399e-05	-0.00247946	-0.00295705	0.00144834	0.00159495	0.00454015	-0.00331791	0.00295264	-0.000963992	0.00227501	0.00120424	0.00499779	0.00103609	0.00128951	-0.000528987	0.000389561
HT11-H0	0.283316	0.0255955	0.0302123	0.0146204	-0.00110564	0.0755209	0.0164794	0.0177248	0.0186219	0.0138368	0.00304017	0.0499984	0.0599296	0.0644064	0.000237477	0.0327132	0.0120443	-0.00119839	-0.0156364	-0.00956958	0.00174051	0.0223788	0.00517125	0.0130579	0.0187704	0.00594138	-0.00553846	-0.00568004	0.000290207	0.00186768	0.0160585	-0.0106714	0.000419355	-0.000764832	0.00571637	0.00275613	0.000263438	0.00395123	0.00156043	0.00261232	-0.00260541	-0.00356209	0.00128544	-0.00175267	0.00359635	0.00187605	0.000453135	-0.00146212	-0.00239313
HC6-H0	0.264221	0.076839	0.00782601	-0.0324055	0.0692483	0.0554576	0.0200229	0.00955429	-0.0181562	-0.034199	0.00539361	0.0126027	0.0101056	0.021978	0.0361837	0.0343453	-0.0346556	0.00255811	0.014631	-0.00487757	-0.00657578	-0.00875418	0.010512	-0.018028	0.000298324	-0.0208263	-0.0132289	0.00887395	-0.00275777	-0.000735643	0.0116769	0.00634037	-0.00645773	-0.00471739	-0.000149436	0.00632971	-0.00201671	-0.00563788	-0.00707815	-0.00259435	0.000444126	0.00436613	-0.00782707	0.0021123	-0.00329546	-0.00219575	0.00178183	0.000513659	0.00299369
HC11-D7	0.118023	0.0013306	-0.0104843	-0.00725108	0.0459642	-0.00990091	-0.0297377	0.0321181	-0.0211003	0.000565857	0.00764742	0.0156372	-0.0172332	0.0098332	-0.0121092	-0.00766485	0.0118441	-0.00977515	-0.00689105	-0.00785615	-0.00683619	-0.000291251	0.00480799	-0.0163331	-0.00196001	0.00112422	-0.00859205	-0.0173024	-0.000414289	-0.000653033	-0.00885253	0.00510145	0.00457008	-0.00512414	0.010423	0.00583092	0.00749082	-0.00397377	-0.00455182	-0.0107263	0.00284551	-0.00547945	0.00746262	-0.00223865	0.00504027	-0.00721632	-0.00336034	-0.000923359	-0.00122498
HT3-H0	0.349726	0.0294399	-0.134437	-0.0190506	-0.128018	0.0320246	0.0292512	-0.0244542	-0.0375592	0.021363	-0.0126489	-0.0419688	-0.00594607	0.00310677	-0.00190744	-0.0274204	-0.00406638	0.0312316	0.017414	-0.0110389	-0.00450579	-0.0168095	-0.00480139	0.00205322	0.010378	-0.00589031	-9.33147e-05	0.00831741	0.00568479	-0.0112401	0.00164821	-0.0122598	0.00492532	-0.00314197	0.00845131	0.00340834	0.00473993	-0.00136904	0.00176813	-0.000134115	0.00320321	0.00257413	-0.00198972	-0.000251042	-0.00194261	0.000662374	0.00273248	-0.00028325	-0.0023951
HC11-H0	0.17954	0.0482444	-0.0020308	0.0163742	0.0285248	0.0276646	-0.000316005	0.0127859	-0.0233783	0.0223045	-0.0135028	-0.000719084	0.00112214	0.00969252	-0.00467303	-0.0235441	0.00907842	0.00581732	0.00712833	0.00144526	-0.00306105	0.00340732	-0.000608912	0.0057743	0.00843298	0.00613282	0.00490113	0.00171857	-0.00724735	0.0153118	0.00801577	-0.00179014	0.00435048	0.00684755	-0.0133063	0.00336036	-0.00388716	-0.00212332	0.0073336	0.00345504	0.00685041	4.42402e-05	-0.00632486	-0.00593868	-0.00322103	-0.000387915	0.0100959	-0.00154546	-0.00356259
HC1-D7	0.183075	0.076067	0.0172041	0.0186318	0.0169247	0.0406757	0.0313505	-0.0237887	0.0224998	-0.0180265	-0.0454976	-0.000820971	-0.026704	-0.00473596	-0.00874777	-0.0117695	0.00667375	0.0163204	0.000959283	-0.0181283	0.0206705	-0.00974749	-0.0126108	-0.00465128	-0.00871543	0.0010449	-0.00757423	0.00703969	-0.0098593	-0.0175881	0.0124212	-0.00437646	0.00981957	0.0051712	0.00688821	0.000520705	0.00254616	-7.27603e-05	0.00548107	0.00650516	-0.0014906	0.0021839	0.00829143	0.00605429	0.000945562	-0.00119256	-0.000401582	-0.000920895	-0.000807494
HT13-H0	-0.0995103	-0.00329708	-0.0974283	-0.0725146	0.00837492	0.0136786	0.0454812	0.0109683	0.0189531	0.0165705	-0.00359951	0.0475358	0.0242003	0.0156599	0.00658561	-0.0135474	-0.00114139	-0.0285275	-0.000860013	-0.0217754	-0.0048987	0.00449532	-0.00477877	0.00530327	-0.00570365	0.0140281	-0.000874082	0.00922366	-0.00710829	0.00556086	0.00709182	0.000858073	0.0115233	0.00193089	-0.000518542	0.0046533	0.00238095	0.00445861	-0.00679551	-0.00135213	0.00315086	0.00372693	-0.00610435	-0.00271186	-0.000990198	7.43901e-05	-0.000857307	-0.000974879	-0.00123609
HC10-D3	0.142238	0.0263113	0.0145301	0.0362666	0.00593609	0.0145848	-0.00796791	-0.0134517	0.0170783	0.0255185	0.00294463	-0.00907083	-0.032213	0.0133547	-0.0153094	0.00615279	0.000724164	0.0107995	0.00285978	-0.0136699	0.0082997	-0.00737137	0.00722358	-0.0227075	-0.00834341	0.0101924	-0.00478777	0.000945175	-0.006229	0.00438271	0.00511336	0.00309493	0.0066358	0.000754839	-0.000161223	-0.0057964	-0.00316823	-0.00437503	0.00328361	-0.00434593	0.00701594	0.000682899	-0.00437018	0.00285536	-0.00188401	-0.00524303	0.00360858	0.00258018	0.00120007
HC15-H0	0.265407	-0.00917816	-0.0435357	-0.0962502	-0.029849	0.0121336	-0.0426891	0.0158597	-0.0449483	0.0252121	0.0379506	0.00230834	-0.0155873	-0.0225105	0.00889248	0.00843098	0.014959	-0.0233255	0.0101204	-0.0150149	-0.0312292	0.00735324	-0.0248119	-0.000317892	-0.00595555	0.0230671	0.0110484	-0.00478847	-0.00839839	-0.00489652	0.0049168	0.0133294	-0.0078262	0.000782631	0.00306702	-0.0085925	-0.00139992	-0.00122186	-0.00100956	-0.00300383	-0.00166319	-3.72764e-05	-0.000551475	0.00155558	-2.42614e-05	-0.00257838	-0.000798281	0.000968064	0.000473864
HC14-D7	-0.159658	-0.0536761	-0.0485266	-0.147572	0.0946952	0.0213115	-0.0571971	-0.0317482	-0.0185138	0.0243685	0.0676472	0.0256523	0.0349551	-0.017612	0.0134676	0.0173923	-0.0066152	0.0104369	0.0352704	0.00865526	0.0260891	0.00471364	-0.00401766	0.000777042	-0.00547715	-0.0105581	0.00396888	0.00302967	-0.00156031	-0.0035986	0.00606616	-0.000202145	-0.00113621	-0.0023659	0.00203543	0.00268539	-0.00164169	0.00719504	-0.00397944	0.00458685	0.000266341	-0.00142961	0.00202956	-0.00400143	0.00052414	-0.000887308	-0.000809322	0.00177722	0.00165817
HC10-H0	0.221567	0.0697125	0.0416926	0.0627083	-0.00372768	0.0616395	0.0334425	-0.0136324	0.0433676	0.00587721	-0.00228574	0.00289767	0.0031032	-0.0164983	-0.0313881	0.0229401	0.00899711	0.00357714	0.00565632	-0.0087763	-0.00355493	0.0178366	-0.00218614	-0.00055742	0.00468132	-0.00703815	-0.00202636	-0.0112998	-0.000621881	-0.000995624	0.00162087	0.0120556	0.00111645	-0.00746683	-0.00530573	-0.0122342	0.00915791	-0.00334514	-0.00364276	-0.00471883	0.000424475	-0.000840565	-0.00294093	0.00473832	-0.00121891	-0.000449679	-0.0024002	0.00256985	0.000460604
HT11-D5	-0.153994	0.0394084	-0.0497593	0.0348572	0.0128841	-0.0334459	0.0375014	0.0165444	0.0202066	0.00393362	0.0188109	0.000672265	0.00878569	-0.00845505	-0.005353	-0.00669311	0.00709322	-0.0125832	-0.00869561	-0.0118831	0.00392768	-0.0121425	-0.0213864	-0.00934749	0.00941417	0.00292972	-0.0208509	0.00971674	-0.00367608	-0.00267279	-0.00620333	0.00100583	-0.00322655	0.00196635	-0.0118342	-0.000290163	-0.000181763	-0.00877418	0.00251498	0.00534204	0.00214456	-0.00346703	0.00301857	0.00206863	0.000234105	0.0040466	-0.00451663	0.00464658	-0.00203406
HC10-D7	0.0839925	-0.00936644	-0.00881218	-0.0425283	0.0679969	-0.0258132	-0.0255728	0.0323243	-0.00355587	-0.00905191	0.0164016	-0.0160618	-0.0221024	0.00233197	-0.0152772	0.0285986	0.0116078	-0.0105267	-0.00627962	0.00601263	0.0119084	0.00303938	0.00779858	-0.0179697	0.00899783	-0.00429531	-0.00718601	0.00484873	0.0054382	0.0051261	0.00741908	0.000656899	-0.00674128	-0.00143865	0.000249986	0.000452474	-0.00548328	0.0127689	0.00259193	-0.00248009	9.32913e-05	0.0122137	0.00372921	0.00317698	-0.00389289	-0.00497004	0.00154961	0.000105297	0.00370037
HT4-H0	0.192839	0.0638104	-0.00867943	0.00362073	0.0420991	0.0374326	0.00857231	0.0196148	-0.0247706	-0.00125057	-0.0187321	0.00151843	0.0101515	-0.0145608	0.000759412	-0.00744163	-0.00760668	-0.0162854	0.0161375	0.00561785	0.00724531	-0.0076682	-0.000352536	0.00137931	-0.0125256	0.00537939	0.00522505	-0.00144356	0.0143404	-0.00523291	-0.0287102	-0.00518201	-0.00989923	-0.00238592	0.00386664	-0.0110263	0.0015092	-0.00421907	7.96204e-05	-7.48656e-05	0.00416611	0.00226451	0.00560777	-0.00568835	0.00526556	0.000843234	0.00749038	-0.0020539	0.00311802
HT1-H0	0.0275092	0.0173524	-0.0485002	-0.018253	0.0214685	-0.0302527	0.0166372	2.21152e-05	-0.0129945	-0.0159792	-0.0341051	0.0118062	-0.00858511	0.0113484	0.00103564	0.0116554	-0.00203301	0.00641907	-0.0143196	-0.00581133	0.00651778	0.0046877	-0.00475199	0.0184919	0.0101486	-0.0221309	0.00201695	-0.00129252	-0.000820012	0.0137306	-0.00672889	-0.00605719	-0.00356081	-0.00870973	-0.0054624	0.0107381	-0.00409923	0.00104298	0.000373382	-0.00121112	-0.00458437	0.00714412	0.00455069	0.00378484	0.00624171	0.00197512	0.00297907	0.0012908	0.00540534
HT14-H0	0.232605	0.0926895	0.0205972	0.00710823	0.0432218	0.063461	0.0332686	0.00382453	-0.00470571	-0.0274328	-0.0207905	0.0141239	0.0116032	-0.0256922	0.000549165	-0.00765775	0.00852514	0.00492829	-0.00810437	0.013638	-0.00918372	0.00581823	-0.0146199	-0.00376392	0.00166024	-0.00655126	-0.00735182	-0.00801465	0.0175611	-0.00463702	-0.00227567	0.00168187	0.00808006	-0.0132476	-0.00699352	0.013092	-0.00478438	0.00104935	-0.00371995	0.00217739	-0.00647607	-0.0034716	-0.00334564	0.00162253	0.000570266	-0.00510942	-0.00104083	0.000807755	-0.00236445
HT1-D5	0.267915	0.153186	0.0505946	0.153427	-0.00103772	0.0549135	0.0639626	0.00480686	0.0151349	-0.0165106	0.0101	-0.0131136	0.0335687	-0.0202847	0.0236752	0.0286072	-0.00755801	0.000244015	-0.00331935	0.015806	0.0135361	0.0202695	0.0153566	0.0144102	-0.0117222	0.00918367	-0.00299449	-0.00677946	-0.00757183	0.0048084	0.00138341	-0.00334294	0.00305005	0.0140073	0.00700989	0.00406483	-0.00221732	0.00497046	0.00224158	-0.00176707	-0.00112817	-0.00273463	-0.00237175	-5.6266e-05	1.01888e-05	-0.00224869	-0.000234226	-0.000711879	0.000628995
HC5-H0	0.168481	0.0473545	-0.0114691	0.00783027	0.0426207	0.0149423	-0.00898881	0.0126663	-0.0337368	0.0188011	-0.0179715	-0.00195283	-0.0174818	0.0187328	0.00858905	-0.0262622	-0.00418916	0.00377565	0.00197827	0.000554469	-0.0180347	-0.0103898	0.00552995	0.00204018	-0.0109991	-0.00468916	0.0114183	-0.00294191	-0.000137348	0.00790342	-0.00437783	0.0123302	0.00507122	-0.00451773	0.00473639	3.34784e-05	0.00709722	-0.00124139	0.00122204	0.0108987	-0.00823686	0.00108216	-0.00187091	-0.00228425	-0.00337291	0.00132415	-0.0069282	0.000391592	-0.00128399
HT5-H0	-0.0448558	0.0146077	-0.0481431	-0.00562589	0.0198034	-0.0264418	0.0306662	-0.000629814	0.00986466	-0.000939285	-0.0163483	0.00143367	0.00990404	-0.00312199	-0.0406254	0.00829506	0.0117804	0.00590207	0.0114149	0.00186837	-0.000994709	-0.00519318	-0.00319399	-0.00408453	0.0162315	-0.00442748	0.020502	0.00674842	0.00059315	0.00855658	0.00474739	0.00323329	0.000732568	0.000681194	-0.00188393	0.00250253	0.00173687	-0.00848507	-0.00548302	-0.00174626	0.00344016	-0.00646205	-0.00341531	0.00404918	0.0004139	-0.00380075	-0.00123724	-0.00303983	-0.00366884
HT9-H0	-0.107217	0.0278479	-0.0503164	-0.000694265	0.0223262	-0.0111366	0.0433028	-0.0175975	0.0282761	0.0168557	-0.00766493	0.00399895	-0.0136228	-0.00574806	-0.00958266	-2.88131e-05	-0.0077589	0.00972892	0.0114756	-0.0139211	-0.0221059	0.00773256	0.00441009	0.00093915	-0.00979585	-0.0147557	-0.00670651	-0.00694404	-0.00111278	0.0108348	-0.00186536	-0.00397885	0.0106456	-0.0185691	-0.00811955	0.00072079	0.00590231	0.000258804	-0.00214431	0.00506919	-0.000245892	-0.000290158	-0.00384814	-0.00111939	-0.000715412	0.00262382	-0.00148011	-8.58185e-05	0.00273759
HT11-D3	-0.160155	0.0408742	-0.0481099	0.0234448	0.0201846	-0.0122263	0.0419461	0.00825173	0.0264888	0.0105977	0.015215	0.00752558	-0.0111451	-0.00818187	0.00552854	-0.0135322	0.00189961	0.00727885	-0.0152161	-0.0130316	-8.85565e-05	-0.00288936	0.00693501	0.00713752	0.00681469	0.00492665	-0.00889721	-0.00825923	-0.011157	0.00510954	0.00131124	0.00566056	-0.00819281	0.012269	-0.0112241	0.00824001	0.00446385	0.00485116	0.00507119	0.0031577	0.00496866	-0.00389596	0.00308056	0.000682946	-0.00158115	-0.00314167	0.0007296	-0.00336013	-0.00134498
HT10-H0	0.344567	0.057788	-0.0837722	-0.031357	-0.0691923	0.0517069	0.0440198	-0.00778925	-0.0301667	-0.0560285	-0.0161959	0.0150317	0.0252858	0.00107715	0.0168918	-0.00447971	-0.0139626	-0.0219096	-0.0191377	0.0172947	0.00237829	0.0199492	0.0206234	0.00349369	-0.0174997	0.0191302	0.00366604	0.00325186	-0.0077735	0.0103667	0.00349136	0.0042554	0.00170158	-0.00302015	-0.00140919	-0.00382263	-0.00672076	0.00323307	0.00416035	-0.00127887	-0.00269609	-0.00853124	0.00300971	0.00356238	0.000215703	-0.000667506	-0.000767424	0.00191543	0.000984207
HT4-D5	-0.215775	0.381263	0.24296	-0.210577	-0.146914	-0.00970018	-0.0586539	0.00146225	-0.0110868	0.041095	-0.0450809	-0.0235372	0.0123994	-0.00520982	-0.0182207	-0.0129668	-0.0547595	-0.022916	0.000705261	-0.00487304	0.0229932	0.0193613	-0.00967303	0.000265019	0.00737366	0.00180226	-0.00839913	-0.00751605	0.000661244	-0.0012167	0.00523097	0.000588404	0.000422451	-0.002157	-0.00103246	0.000228548	0.00156642	0.00223854	0.0008502	-0.000839979	0.000180854	-0.00155103	-0.00160891	0.000199678	-0.000627119	-0.000158635	-0.000870716	1.50213e-05	6.06586e-05
HT7-D3	-0.138713	0.0422616	-0.0545397	0.00998646	0.0246021	-0.00780409	0.0529155	0.00282044	0.0111572	0.00504276	-0.00858751	-0.00712181	0.0110092	-0.0123088	-0.00519133	-0.0118917	-0.011471	0.0182188	0.00597007	-0.00933421	-0.00402067	0.00279545	0.0234245	0.00344053	-0.0111981	0.00774156	-0.0116849	-0.00603876	0.0017069	-0.00390702	2.99824e-05	0.00691565	-0.0114024	-0.0099887	0.00755547	0.0125722	0.00495342	0.00389369	0.00504375	-0.00260068	-0.00210596	0.00738905	0.00741877	-0.00570329	-0.00660207	0.00126806	-0.00478984	0.00199515	-0.00295546
HT12-D3	-0.344245	0.119879	-0.0742034	0.0271114	-0.0139263	0.0285375	-0.00568099	0.0228554	-0.024237	-0.0117407	-0.00797573	-0.00355725	-0.0149726	-0.00453288	-0.0123646	0.00452677	-0.00588784	0.0045037	-0.000219059	-0.00767189	-0.00835445	-0.006997	0.000390554	-0.00514911	-0.0111587	0.00314999	-0.00258342	-0.00108961	0.00176474	0.00341934	0.00236784	-0.00215195	-0.00463796	0.00561506	-0.00224534	-0.000478073	0.00464512	0.00220977	0.000181842	0.00112823	-0.00395876	0.00378975	0.00349666	0.00312274	0.00207895	0.00209077	0.00111231	0.00143826	0.00228993
HT15-D5	-0.32993	0.11647	-0.0672987	0.0198345	-0.00993953	0.0332324	-0.00396356	0.0076207	-0.0205342	0.00285998	-0.0187166	0.00273794	-0.0341076	-0.00731359	0.0050393	0.0106879	-0.013132	0.015238	-0.00628734	0.0287082	-0.013906	-0.00463357	0.000817299	0.0150271	0.0219365	0.00616312	0.00293024	0.00492279	-0.00865156	0.0113598	-0.00139483	-0.00226026	0.0169993	-0.00103079	-0.00205865	0.00340411	-4.84379e-05	-0.00221556	-0.00374904	3.33695e-06	0.000304037	0.00451327	0.00428484	-0.00422336	-0.00182094	-0.000607656	0.00232458	0.00348283	-0.000816289
HT11-D7	0.0171956	0.0448839	-0.0430265	0.0826869	0.00799778	-0.0621049	-0.0121265	0.0228664	-0.0195733	-0.0315354	0.0020654	0.0136784	0.00263314	0.00740436	0.00822223	0.0047176	-0.0197693	0.0149242	0.0302065	0.00423754	0.00984773	0.0159957	0.00311476	-0.0193528	-0.00849631	0.0133147	0.00709765	-0.00176706	-0.0111626	-0.000307997	-0.00593393	-0.00441019	0.00567652	0.00524254	0.00876322	0.00075547	0.00920952	-0.000762526	-0.00914335	0.00514227	0.00750734	0.000296112	-0.00286257	0.00267078	0.00123092	-0.000256844	-0.00398535	0.00157644	0.000305162
HC4-H0	0.206805	0.0683702	-0.00373369	0.0339855	0.0344446	0.03578	0.00421132	0.0116192	-0.034205	0.034439	-0.022324	-0.0195884	-0.000124928	0.0281679	-0.00912796	-0.0276451	0.0105761	0.0165784	-0.00107738	-0.00604253	-0.0107058	0.0122556	-0.00516165	0.0185619	0.00212974	0.00459728	0.0158894	-0.00319388	-0.000424916	-0.0151237	-0.000592858	-0.00240557	-0.00852819	0.00526708	-0.00139639	-0.000192788	-0.000719925	0.00694525	-0.010591	-0.0065166	-0.00149538	0.00340535	0.00431701	0.00348375	0.00222344	-0.0030161	-0.000847743	0.00150117	0.00595318
HT12-D5	-0.156485	0.0553014	-0.0568608	0.0392122	0.0141762	-0.0337717	0.0437659	0.0203338	0.00258989	-0.00361902	0.0035528	-0.00947416	0.0141716	0.000760252	0.00369195	-0.0115333	-0.00906067	-0.00547073	-0.00950635	0.00138348	-0.00661031	-0.00487242	-0.00949262	0.00347351	-0.00500161	-0.006931	0.00265634	0.00728615	0.00926135	-0.0201552	0.00240288	0.0139656	0.0070362	0.0165729	-0.00790868	0.00112126	-0.0143514	0.00809433	-5.84266e-05	-0.00214069	0.0029838	0.00424814	0.00503379	0.00191571	-0.00245852	-0.00263039	-0.00473932	0.00385832	0.00117038
HT6-D5	0.0227273	0.0559199	-0.0273278	0.0717132	0.00278311	-0.0496907	-0.00630252	-0.00275935	0.00578892	-0.0404904	-0.0148758	0.00522519	-0.0426331	-0.0145795	0.0274368	0.00527307	-0.0155134	0.0115717	-0.0158269	-0.000610727	0.00521329	0.00448512	-0.00965877	0.00547217	-0.0110023	-0.00539566	-0.000183409	-0.00491224	0.0142492	0.00360626	0.00840569	0.00250925	0.00570866	0.00325043	0.00555012	0.0053894	-0.00806315	-0.00239795	-0.00457994	-0.00819326	0.00238997	-6.02255e-05	-0.00170083	-0.00131544	0.000855538	0.00164938	0.00192333	-0.00327077	-0.00324631
P8	0.0748687	0.035178	-0.025722	0.00305413	0.04738	-0.022366	-0.00464857	0.00549805	-0.0243809	-0.0464741	-0.0354105	0.0149139	-0.0171509	-0.0264566	0.000335054	-0.00865749	0.00655692	0.0024455	-0.0283895	0.00662364	0.00731611	-0.00101663	0.015277	0.00198644	-0.000352476	0.00596557	-0.00953893	-0.000941023	0.0059708	-0.00931277	0.00410166	0.00166804	-0.00444995	-0.00589276	0.00245092	-0.0139069	0.000583172	0.00724806	0.00250121	0.00480778	-0.000758967	0.00237926	-0.00591228	-0.00578551	-0.00290444	0.00152428	-0.00102073	0.00212834	-0.00265134
HT10-D5	-0.223183	0.0677412	-0.0595227	0.0226163	0.00203897	0.0021825	0.0419599	0.0283593	-0.0116232	0.0121643	0.0242206	0.00172091	0.00448341	-0.0223719	0.0215219	-0.00914817	-0.00150996	0.0211778	-0.00368462	-0.00504996	0.0195969	0.000251563	0.00699657	-0.00343977	-0.00434587	-0.00648641	0.0292695	0.00399395	0.000991133	0.00452279	0.00109716	-0.00375894	-0.00101652	-0.00700055	-0.00799461	-0.00433252	0.00449391	-0.00232796	0.0104651	-0.00619954	-0.00746045	0.00163861	-0.00386128	0.000987404	0.00591063	0.000823519	-0.000652781	0.000527213	0.00121611
HT1-D7	-0.150965	0.052821	-0.0557698	0.036695	0.017895	-0.0295853	0.0491774	0.0193818	0.00523162	-0.00362738	0.00469161	-0.00838572	0.0193801	-0.00960317	0.00354647	-0.0114271	-0.00745383	0.00179235	-0.00641617	-0.000213332	0.00169874	-0.00783981	-0.00120728	-0.00478307	-0.00115068	0.00674992	-0.00766456	0.0095158	0.00105662	-0.00250618	-0.00675213	0.00539663	-0.00121517	-0.00112145	0.0021818	-0.000359504	0.000340524	-0.00368919	0.00133909	0.00284728	-0.0136018	-0.00336485	0.000524757	-0.000577841	-0.00471948	-0.00896918	0.00704188	-0.00547686	0.00261518
HC4-D3	0.170808	0.0688413	-0.00777824	0.0523353	0.00972938	0.0241775	0.0101721	8.45485e-05	-0.0169019	0.0176105	-0.0169494	-0.01437	3.52907e-05	-0.00568981	-0.00550841	-0.00199275	-0.012613	0.0170369	0.0149925	0.0115895	0.00326336	-0.0177313	0.0217121	0.00082668	0.00883157	0.00504811	0.00837741	0.00300283	0.00306523	0.00106367	-0.00377505	0.00352975	-0.0105621	-0.00315328	-0.0086465	-0.00961221	-0.0038574	0.00265526	-0.00339534	-0.00136286	-0.00449832	-0.00232986	-0.00137982	-0.0033552	-0.00216372	0.00313091	-0.00224138	-0.00166641	-0.000521374
HT14-D5	-0.147129	0.0541815	-0.0537775	0.0365978	0.0239443	-0.0296313	0.0510303	0.0134648	0.0130104	-0.00177583	-0.0027644	-0.0115604	0.0115731	4.18142e-05	0.00887615	-0.0135638	-0.00953727	-0.0035024	-0.0057457	0.0107776	-0.000832389	-0.004462	0.00780252	0.00219071	-0.00135111	0.00724245	-0.00958772	-0.00608741	-0.00276952	0.00144722	0.0076858	0.0109358	0.00114907	0.00222646	0.0137741	-0.0105348	-0.00499461	-0.00791569	-0.00302278	-0.00215852	0.00563135	0.00318556	-0.00400139	0.00186131	0.00627157	0.00499149	0.00239525	-0.00539473	0.00446115
HT13-D5	-0.306103	0.100042	-0.0649433	0.0258064	-0.0106037	0.0232883	0.0142548	0.0256118	-0.0266119	-0.0026633	0.00998664	-0.00532981	-0.0186754	-0.00988256	0.00161101	0.00109203	-0.00241179	0.000713206	-0.0056109	0.00213379	0.0115764	-0.00410369	-0.00491738	-0.00104969	-0.00162839	-0.00759016	0.0107069	-0.0162018	2.0096e-05	-0.0117492	0.0169226	-0.0090536	-0.00738282	-0.0135483	0.00379557	-0.00307855	0.00217015	-0.00471446	-0.00698732	0.0111912	0.0125707	-0.00901026	-0.00046829	0.00191438	-0.00295343	-0.00177474	0.00052714	6.59098e-05	0.000135727
HT1-D3	-0.237943	0.0538601	-0.110907	-0.0954113	0.0472666	0.0932873	-0.00363999	0.0515338	-0.0491221	-0.0273492	-0.0188952	0.0326887	-0.00614309	0.00188055	0.00952809	0.00667802	-0.014372	-0.00523621	-0.0214891	0.00284364	-0.0034831	-0.00556554	-0.00599217	-0.0178251	0.00664791	-0.00896251	0.00411596	-0.0158878	0.00395807	-0.0124821	-0.0176854	0.00407964	0.00206311	-0.000281196	0.00664049	0.00136999	0.000572467	-0.00304472	0.00463673	-0.00131589	0.00183014	-0.00267093	1.85079e-05	0.00273352	0.000275534	-0.00109353	0.00188854	0.000712552	-0.000357986
HT6-D7	-0.132057	0.0525722	-0.051446	0.0239573	0.0112284	-0.045422	0.046827	0.000503525	0.00288487	0.00602112	0.00229569	-0.00793498	0.0170754	-0.0193279	0.00745322	-0.0107945	-0.00471076	-0.00746903	0.00874126	0.0139109	-0.0154685	-0.00986562	-0.015688	0.00025655	0.00312943	0.00679257	-0.00967637	0.0139736	-0.00161216	0.000907169	-0.00606011	-0.0260069	0.00333177	-0.00669778	0.00677603	-0.000945768	-0.000493942	0.00918554	-0.00201455	-0.0100461	0.00131453	-0.00236312	-0.00374099	0.0033651	0.000245291	0.00174687	0.000219801	0.00448665	-0.000942111
HT13-D7	0.0412073	0.105386	0.0736807	-0.030547	-0.00116046	-0.156223	-0.00508543	-0.0111009	-0.0586148	0.100103	-0.0206639	-0.0403728	-0.0301695	0.0242589	-0.00319271	-0.00293016	-0.00732684	-0.00429145	-0.0241925	0.0147535	-0.00489044	-0.00789074	0.0144316	0.0048315	0.00143318	0.00132935	0.00771489	-0.00414907	-0.00678795	-0.00178078	-0.0056736	0.00232213	0.00181265	1.99265e-05	0.00470149	0.00726068	-0.00204213	0.00181942	-0.00327152	0.0011466	-0.00432495	0.00073906	-0.00335685	0.00214828	0.00218459	-0.00146466	-9.94182e-05	9.11086e-05	-0.000558061
HT8-H0	0.191555	0.0534891	0.00678197	-0.0353685	0.0758814	0.0218484	-0.00778428	0.0321755	-0.00995003	-0.0323062	0.0144292	-0.0295175	-0.0170086	-0.0282269	-0.00212431	-0.00597515	-0.0170846	-0.0113425	0.0293836	-0.00798543	-0.00822867	0.000918368	0.000543866	0.0131225	0.00012436	-0.0214167	0.00327394	-0.00111196	-0.00371928	0.000348328	0.00949922	-0.00803095	0.000977928	0.0201947	0.00139193	0.000429159	0.00437905	0.00130238	0.00832346	0.00326361	-5.04506e-05	0.000472212	0.00698722	0.00157052	0.00165269	0.000809751	-0.00188406	-0.00258518	-0.00199482
HT10-D3	-0.41924	0.134958	-0.0991304	0.041859	0.0482935	0.0251877	-0.0740162	-0.12237	-0.0298034	-0.0327594	0.0195546	-0.00753284	0.0183139	0.00307171	-0.0120627	-0.0259824	6.25102e-05	-0.0118352	0.0161468	-0.00639515	0.0275526	-6.64509e-05	0.00912706	0.0160015	0.000829578	0.0039435	0.00589486	0.00228878	0.00667897	-0.00362254	-0.00310685	0.00119218	0.00114534	0.000416419	-0.00248451	-0.00156596	-0.00226484	-0.00135176	-0.00191555	0.00188421	-0.00213045	0.00299889	-0.000812023	-0.000356031	2.69154e-05	-0.00113344	-0.000250088	-0.00113273	-0.000692829
HT13-D3	-0.255155	0.241035	0.107306	-0.092772	-0.107253	0.088706	0.0100486	-0.0167685	-0.0243691	-0.0852365	0.0666993	-0.0305557	0.00745108	0.0403635	0.0331555	0.0127146	0.0830428	0.0234534	0.00580342	0.000147603	-0.0298212	-0.00177347	0.0159814	-0.00171136	-0.014564	-0.00893396	-0.000387708	0.0181901	-0.00229128	0.0023676	-0.00829998	-0.000339577	0.00113686	-1.75448e-05	0.000470241	-0.00139433	-0.00327392	-0.00131583	-0.00590436	0.000734372	0.000137664	0.00192659	0.00150239	-0.00212102	0.00153471	0.000216769	-0.000210615	-0.000799635	-0.00121568
HT5-D5	-0.171459	0.0797466	-0.0472046	0.0268069	0.103744	-0.0753521	-0.017591	-0.226887	0.0330462	-0.0185022	-0.0425377	0.0203667	-0.0282082	0.0216422	0.0284772	0.00232127	0.0133546	-0.0142489	0.0312929	0.00194947	-0.00819989	0.0270189	-0.00314454	-0.00861011	0.00418322	-0.00538966	-0.00126906	0.00157496	-0.00376172	-0.00264906	-0.00368618	-0.000625176	-0.00215588	-0.000506832	0.00322558	-0.000985813	-0.000234446	0.00196652	0.00270159	-0.00212579	0.00142914	-0.00203683	-0.000486265	0.00124862	0.000817815	-0.000686469	-8.56516e-05	-0.000705768	-0.000818426
HT9-D7	0.0670157	0.174805	0.148478	-0.0560283	-0.032676	-0.154216	0.10924	-0.0110529	0.0081013	-0.0559378	0.0171036	-0.0283134	0.0380327	0.0289339	-0.00161904	-0.0045268	0.0107123	-0.0160784	-0.00118678	0.0100881	0.0126499	-0.0132778	-0.0102423	-0.00269893	0.00511114	0.000425227	0.00639706	0.00139155	0.0113743	3.2967e-06	0.00562117	0.00577085	-0.00204183	-0.00449299	-0.00196468	-0.00148184	0.00633089	-0.00226867	0.0030034	0.000781126	0.00167776	0.0022122	0.00171703	0.000250744	-0.000263015	0.00099258	0.000511282	0.000248487	-0.000417827
HT14-D3	0.165884	0.0959996	0.206395	0.00777773	-0.042782	-0.152792	0.00231678	0.0291766	0.0311198	-0.0630978	0.0575756	0.106548	-0.0336019	0.00639221	-0.0166031	-0.0451382	-0.00667954	0.0140215	0.0131992	-0.0175158	-0.0155229	-0.0232004	0.00403059	-0.000659191	0.00632186	0.00163803	0.00256362	-0.00283936	0.0018207	0.00096183	-0.00277458	-0.00556076	-0.00722917	-0.000359086	-0.004891	0.000238542	-0.00263305	0.000975967	0.000387971	0.00026275	0.000298049	-0.00165568	0.00185698	-0.000998973	1.20735e-05	0.000545622	0.00114079	0.000668853	0.00162668
Biplot	0	0
Site constraints	0	0
[truncated: 76 more columns]
