# Supplementary material for: Antibiotic exposure perturbs the gut microbiota and elevates mortality in honeybees
Source: PLoS Biol. 2017 Mar 14;15(3):e2001861. doi: 10.1371/journal.pbio.2001861 (PMC5349420; doi:10.1371/journal.pbio.2001861)
Supplement: S6 Data — (XLSX) [file pbio.2001861.s016.xlsx]

## Sheet: Control_vs_All
Cox proportional hazard model (coxph)
Non age-controlled bees: Control vs all groups
Group	coef	exp(coef)	se(coef)	z	Pr(>|z|)
TreatmentControl_KZ11	1.1077	3.0274	0.2448	4.524	3.035e-05	***
TreatmentTreat	1.2004	3.3214	0.2414	4.972	3.315e-06	***
TreatmentTreat_KZ11	1.7959	6.0248	0.2347	7.651	9.95e-14	***
Group	exp(coef)	exp(-coef)	lower 0.95	upper 0.95
TreatmentControl_KZ11	3.027	0.3303	1.874	4.892
TreatmentTreat	3.321	0.3011	2.069	5.331
TreatmentTreat_KZ11	6.025	0.166	3.803	9.544
Concordance= 0.659 (se=0.021)
Rsquare	Max possible
0.173	0.998
Test	DF	P-value
Likelihood ratio test
235.3	3	4.441e-15	***
Wald test
205.1	3	1.6315e-12	***
Score (logrank) test
263.4	3	9.99e-15	***
Signif. codes: 0 ‘***’ 0.001 ‘**’ 0.01 ‘*’ (after Bonferroni correction)

## Sheet: ControlKZ11_V_TreatKZ11
Cox proportional hazard model (coxph)
Non age-controlled bees: (Control + KZ11) v (Treatment + KZ11)
Group	coef	exp(coef)	se(coef)	z	Pr(>|z|)
Treat_KZ11	0.6668	1.948	0.1771	3.765	0.00083	***
Group	exp(coef)	exp(-coef)	lower 0.95	upper 0.95
Treat_KZ11	1.948	0.5133	1.377	2.756
Concordance= 0.586 (se=0.025)
Rsquare	Max possible
0.072	0.999
Test	DF	P-value
Likelihood ratio test
14.47	1	0.000714	***
Wald test
14.18	1	0.000832	***
Score (logrank) test
14.69	1	0.000633	***
Signif. codes: 0 ‘***’ 0.001 ‘**’ 0.01 ‘*’ (after Bonferroni correction)

## Sheet: Treat_Vs_TreatKZ11
Cox proportional hazard model (coxph)
Non age-controlled bees: (Treatment) v (Treatment + KZ11)
Group	coef	exp(coef)	se(coef)	z	Pr(>|z|)
Treat_KZ11	0.5999	1.8219	0.1716	3.497	0.002355	**
Group	exp(coef)	exp(-coef)	lower 0.95	upper 0.95
Treat_KZ11	1.822	0.5489	1.302	2.55
Concordance= 0.594 (se=0.025)
Rsquare	Max possible
0.062	0.999
Test	DF	P-value
Likelihood ratio test
12.34	1	0.002212	**
Wald test
12.23	1	0.0023545	**
Score (logrank) test
12.59	1	0.0019385	**
Signif. codes: 0 ‘***’ 0.001 ‘**’ 0.01 ‘*’ (after Bonferroni correction)
