# Supplementary material for: Antibiotic exposure perturbs the gut microbiota and elevates mortality in honeybees
Source: PLoS Biol. 2017 Mar 14;15(3):e2001861. doi: 10.1371/journal.pbio.2001861 (PMC5349420; doi:10.1371/journal.pbio.2001861)
Supplement: S9 Data — (XLSX) [file pbio.2001861.s019.xlsx]

## Sheet: CoxHP
Cox proportional hazard model (coxph)
Control vs all
Group	coef	exp(coef)	se(coef)	z	Pr(>|z|)
Control_K12	0.7665	2.1521	0.4577	1.674	0.84636	.
Control_KZ11	1.9917	7.3281	0.4063	4.902	8.55e-06	***
Control_WKB2	1.2448	3.4724	0.4296	2.898	0.03384
Control_WKB8	1.1542	3.1714	0.434	2.66	0.07038
Treat	1.164	3.2028	0.434	2.682	0.06579
Treat_K12	0.5328	1.7037	0.4756	1.12	2.36313
Treat_KZ11	2.4542	11.6368	0.3979	6.168	6.237e-09	***
Treat_WKB2	1.2838	3.6105	0.4276	3.002	0.02412
Treat_WKB8	0.4506	1.5693	0.4835	0.932	3.1617
Group	exp(coef)	exp(-coef)	lower 0.95	upper 0.95
Control_K12	2.152	0.46466	0.8775	5.278
Control_KZ11	7.328	0.13646	3.3046	16.25
Control_WKB2	3.472	0.28799	1.4962	8.059
Control_WKB8	3.171	0.31531	1.3548	7.424
Treat	3.203	0.31223	1.3682	7.497
Treat_K12	1.704	0.58694	0.6708	4.327
Treat_KZ11	11.637	0.08593	5.335	25.382
Treat_WKB2	3.61	0.27697	1.5616	8.348
Treat_WKB8	1.569	0.63722	0.6084	4.048
Concordance= 0.691 (se = 0.019 )
Rsquare	Max possible
0.069	0.881
Test	DF	P-value
Likelihood ratio test
123.5	9	p=0***
Wald test
124.1	9	p=0***
Score (logrank) test
152.8	9	p=0***
Signif. codes: 0 ‘***’ 0.001 ‘**’ 0.01 ‘*’ (after Bonferroni correction)
