# Supplementary material for: Antibiotic exposure perturbs the gut microbiota and elevates mortality in honeybees
Source: PLoS Biol. 2017 Mar 14;15(3):e2001861. doi: 10.1371/journal.pbio.2001861 (PMC5349420; doi:10.1371/journal.pbio.2001861)
Supplement: S14 Data — (XLSX) [file pbio.2001861.s024.xlsx]

## Sheet: Exposed unweighted unifac DM
	CS1-D7	CS1-H0	CS10-D3	CS10-H0	CS10-H8	CS2-D5	CS2-D7	CS3-D5	CS3-D7	CS3-H0	CS4-D5	CS4-H8	CS5-D5	CS5-H0	CS5-H8	CS6-D3	CS7-D3	CS7-H0	CS7-H8	CS8-D3	CS8-D5	CS8-H8	CS9-H8	TS1-H8	TS2-D5	TS3-D3	TS4-D3	TS6-D7	TS6-H8	WC1-D7	WC11-D7	WC2-D7	WC3-D7	WC4-D3	WC5-D3	WC5-D7	WC6-D3	WC8-D3	WT10-H8	WT4-D3	WT4-H0	WT7-D5	WT8-H8	WT9-D7	CS10-D5	CS12-D7	CS4-D7	CS6-H8	CS8-H0
CS1-D7	0	0.251374	0.312928	0.247215	0.226039	0.261387	0.238609	0.23979	0.256781	0.234247	0.247383	0.340265	0.209714	0.250182	0.28707	0.266958	0.257898	0.275112	0.404601	0.294922	0.291024	0.281437	0.359896	0.298949	0.209287	0.226427	0.227604	0.455988	0.196748	0.198064	0.279113	0.247013	0.22176	0.201041	0.227223	0.325054	0.248061	0.253194	0.256762	0.267925	0.238774	0.293933	0.341758	0.36469	0.302818	0.252946	0.224119	0.261446	0.22747
CS1-H0	0.251374	0	0.231039	0.309432	0.266489	0.260091	0.276254	0.255046	0.281977	0.216883	0.241725	0.279615	0.233416	0.173162	0.23134	0.289295	0.159398	0.249729	0.31607	0.227732	0.282165	0.217484	0.306069	0.196635	0.239129	0.228469	0.311371	0.4541	0.296974	0.288748	0.294859	0.264483	0.217193	0.280314	0.301176	0.276303	0.231183	0.263537	0.247133	0.254911	0.251147	0.215911	0.327289	0.351556	0.302333	0.287175	0.284387	0.187416	0.277991
CS10-D3	0.312928	0.231039	0	0.187252	0.269608	0.308253	0.290969	0.380317	0.302288	0.266753	0.213466	0.269602	0.261359	0.254199	0.21034	0.215664	0.262042	0.290706	0.409653	0.236872	0.238753	0.209402	0.254819	0.224069	0.303378	0.277101	0.356698	0.480301	0.28057	0.284901	0.253041	0.256719	0.256312	0.286534	0.304045	0.357298	0.229656	0.302549	0.286675	0.305192	0.243946	0.222641	0.332046	0.319203	0.324425	0.268562	0.302412	0.166268	0.272273
CS10-H0	0.247215	0.309432	0.187252	0	0.213766	0.252942	0.223595	0.287061	0.226877	0.28139	0.189366	0.308596	0.192796	0.244291	0.213143	0.250402	0.278883	0.291766	0.423714	0.274683	0.199183	0.233216	0.275332	0.244887	0.239579	0.238529	0.28478	0.48113	0.203781	0.201358	0.233455	0.200776	0.189593	0.189017	0.2436	0.334352	0.25586	0.245523	0.244149	0.307706	0.231955	0.247731	0.298988	0.364907	0.361945	0.218063	0.219515	0.260044	0.184443
CS10-H8	0.226039	0.266489	0.269608	0.213766	0	0.234304	0.216478	0.293318	0.237864	0.285537	0.226913	0.343273	0.216747	0.221284	0.292423	0.267746	0.284848	0.281232	0.384132	0.26052	0.239094	0.275242	0.359455	0.282282	0.22702	0.212897	0.261128	0.449942	0.226801	0.230327	0.300783	0.251028	0.206585	0.223911	0.198296	0.340616	0.294273	0.234726	0.241919	0.310601	0.262631	0.276041	0.340308	0.339686	0.333161	0.249468	0.224235	0.277841	0.165653
CS2-D5	0.261387	0.260091	0.308253	0.252942	0.234304	0	0.243755	0.262017	0.295291	0.269746	0.227272	0.369872	0.183152	0.205703	0.278064	0.310044	0.245881	0.2467	0.315646	0.177741	0.285709	0.301057	0.362289	0.285125	0.201122	0.240924	0.153791	0.383706	0.254805	0.234068	0.326271	0.259177	0.210086	0.22278	0.263026	0.23571	0.269248	0.287888	0.190506	0.268176	0.250651	0.269437	0.297242	0.339318	0.282108	0.258464	0.224704	0.297047	0.216224
CS2-D7	0.238609	0.276254	0.290969	0.223595	0.216478	0.243755	0	0.242701	0.260383	0.231377	0.217943	0.288397	0.135095	0.251328	0.254992	0.235774	0.28274	0.223153	0.320934	0.273306	0.274887	0.275578	0.306439	0.251955	0.214997	0.210377	0.272762	0.439503	0.162158	0.222222	0.281766	0.241814	0.179648	0.183706	0.214653	0.264506	0.251359	0.198902	0.187814	0.28556	0.201449	0.233572	0.359574	0.382944	0.309901	0.212205	0.225935	0.235524	0.226167
CS3-D5	0.23979	0.255046	0.380317	0.287061	0.293318	0.262017	0.242701	0	0.269702	0.225704	0.223308	0.358581	0.227145	0.250614	0.32767	0.323	0.195928	0.243408	0.329999	0.270621	0.311124	0.315909	0.348993	0.251849	0.212855	0.265671	0.265477	0.423478	0.219585	0.251553	0.317524	0.214077	0.257175	0.292765	0.25907	0.234347	0.244497	0.322719	0.262153	0.281811	0.280645	0.30311	0.376686	0.429945	0.347678	0.297822	0.261144	0.31803	0.282877
CS3-D7	0.256781	0.281977	0.302288	0.226877	0.237864	0.295291	0.260383	0.269702	0	0.315506	0.220623	0.356466	0.248353	0.311693	0.274266	0.26686	0.308128	0.282418	0.418851	0.28729	0.267029	0.314439	0.313832	0.240175	0.277744	0.297852	0.256365	0.472679	0.278849	0.234022	0.234736	0.243964	0.222394	0.224493	0.273353	0.346838	0.302961	0.258322	0.276467	0.296882	0.222893	0.255719	0.293398	0.352238	0.344403	0.258048	0.24246	0.294491	0.239613
CS3-H0	0.234247	0.216883	0.266753	0.28139	0.285537	0.269746	0.231377	0.225704	0.315506	0	0.278135	0.290044	0.235889	0.198379	0.247252	0.287803	0.207714	0.219802	0.344874	0.228685	0.25947	0.172258	0.33769	0.275821	0.246282	0.220455	0.284846	0.480679	0.217104	0.216306	0.33168	0.259419	0.250843	0.242259	0.279355	0.265256	0.192001	0.298855	0.263453	0.275468	0.236255	0.199374	0.323949	0.397115	0.354588	0.230299	0.258586	0.186504	0.278569
CS4-D5	0.247383	0.241725	0.213466	0.189366	0.226913	0.227272	0.217943	0.223308	0.220623	0.278135	0	0.254686	0.161674	0.247854	0.231376	0.226595	0.233011	0.265287	0.386235	0.221128	0.252958	0.254049	0.238695	0.204478	0.226288	0.240783	0.289325	0.455017	0.233983	0.21264	0.188389	0.17306	0.167162	0.252679	0.244581	0.331349	0.261972	0.260595	0.199279	0.3054	0.223008	0.232066	0.339328	0.338428	0.26438	0.217779	0.240087	0.219365	0.209575
CS4-H8	0.340265	0.279615	0.269602	0.308596	0.343273	0.369872	0.288397	0.358581	0.356466	0.290044	0.254686	0	0.276059	0.340905	0.295496	0.199556	0.329954	0.348972	0.46723	0.37425	0.370285	0.248401	0.207869	0.316844	0.331698	0.281987	0.406386	0.470737	0.314903	0.32725	0.277612	0.289644	0.25892	0.333545	0.338391	0.447166	0.316159	0.325032	0.282051	0.408422	0.262299	0.280773	0.431714	0.279252	0.267202	0.207888	0.34876	0.254826	0.365579
CS5-D5	0.209714	0.233416	0.261359	0.192796	0.216747	0.183152	0.135095	0.227145	0.248353	0.235889	0.161674	0.276059	0	0.201812	0.208306	0.220763	0.202435	0.198365	0.330485	0.230615	0.223524	0.24747	0.289752	0.218715	0.163415	0.200939	0.192403	0.456949	0.179318	0.200179	0.26216	0.207276	0.147305	0.182995	0.173242	0.275266	0.199673	0.192505	0.137523	0.260864	0.172669	0.199375	0.324785	0.357632	0.302509	0.198039	0.157913	0.205251	0.156146
CS5-H0	0.250182	0.173162	0.254199	0.244291	0.221284	0.205703	0.251328	0.250614	0.311693	0.198379	0.247854	0.340905	0.201812	0	0.238451	0.32956	0.170331	0.189397	0.359899	0.224704	0.210279	0.221831	0.385724	0.23083	0.238385	0.200028	0.275387	0.477915	0.253543	0.252704	0.334163	0.281416	0.219396	0.240847	0.270822	0.263059	0.246089	0.28612	0.220579	0.219509	0.295621	0.222126	0.276911	0.411755	0.38762	0.271076	0.251797	0.245026	0.193876
CS5-H8	0.28707	0.23134	0.21034	0.213143	0.292423	0.278064	0.254992	0.32767	0.274266	0.247252	0.231376	0.295496	0.208306	0.238451	0	0.284471	0.245129	0.238885	0.380043	0.265994	0.218996	0.256404	0.277734	0.213177	0.297492	0.271226	0.344782	0.490827	0.257196	0.252565	0.238418	0.242206	0.207468	0.225566	0.288322	0.318709	0.220865	0.235422	0.239137	0.289506	0.239893	0.195116	0.264217	0.384025	0.356028	0.26642	0.283847	0.199318	0.27167
CS6-D3	0.266958	0.289295	0.215664	0.250402	0.267746	0.310044	0.235774	0.323	0.26686	0.287803	0.226595	0.199556	0.220763	0.32956	0.284471	0	0.319206	0.293407	0.39632	0.310256	0.297418	0.242836	0.202363	0.275657	0.239219	0.293316	0.296298	0.422388	0.230362	0.275157	0.204543	0.233702	0.210644	0.263477	0.283074	0.388497	0.228775	0.280487	0.272345	0.344457	0.211155	0.265041	0.416399	0.206158	0.252769	0.184466	0.299524	0.219993	0.300756
CS7-D3	0.257898	0.159398	0.262042	0.278883	0.284848	0.245881	0.28274	0.195928	0.308128	0.207714	0.233011	0.329954	0.202435	0.170331	0.245129	0.319206	0	0.233534	0.3233	0.21938	0.263247	0.228997	0.318733	0.17994	0.20911	0.234219	0.268792	0.471343	0.271923	0.24016	0.331527	0.234481	0.261938	0.274056	0.280214	0.270288	0.222901	0.306165	0.241654	0.259289	0.255857	0.224969	0.292309	0.427396	0.346305	0.286995	0.275253	0.217004	0.295338
CS7-H0	0.275112	0.249729	0.290706	0.291766	0.281232	0.2467	0.223153	0.243408	0.282418	0.219802	0.265287	0.348972	0.198365	0.189397	0.238885	0.293407	0.233534	0	0.295691	0.26173	0.24405	0.280624	0.371846	0.256365	0.210164	0.271456	0.272693	0.434649	0.225628	0.275543	0.323856	0.306323	0.207178	0.226819	0.30446	0.222549	0.211973	0.293704	0.219985	0.197882	0.258631	0.215496	0.336332	0.389811	0.336469	0.250234	0.235473	0.260109	0.250933
CS7-H8	0.404601	0.31607	0.409653	0.423714	0.384132	0.315646	0.320934	0.329999	0.418851	0.344874	0.386235	0.46723	0.330485	0.359899	0.380043	0.39632	0.3233	0.295691	0	0.265641	0.418404	0.361434	0.449597	0.350034	0.316631	0.3695	0.346952	0.318343	0.330806	0.395543	0.443393	0.354947	0.349435	0.39053	0.34266	0.224552	0.274773	0.382244	0.355812	0.334484	0.356996	0.358019	0.426631	0.454154	0.358203	0.370342	0.402556	0.338757	0.426576
CS8-D3	0.294922	0.227732	0.236872	0.274683	0.26052	0.177741	0.273306	0.270621	0.28729	0.228685	0.221128	0.37425	0.230615	0.224704	0.265994	0.310256	0.21938	0.26173	0.265641	0	0.263836	0.257259	0.332134	0.223437	0.250189	0.28622	0.223363	0.415503	0.273696	0.259664	0.334686	0.240666	0.248356	0.273121	0.287311	0.173746	0.192962	0.303658	0.278168	0.238948	0.264601	0.202362	0.283435	0.36861	0.275972	0.261379	0.287547	0.20447	0.263544
CS8-D5	0.291024	0.282165	0.238753	0.199183	0.239094	0.285709	0.274887	0.311124	0.267029	0.25947	0.252958	0.370285	0.223524	0.210279	0.218996	0.297418	0.263247	0.24405	0.418404	0.263836	0	0.251815	0.347819	0.22263	0.295478	0.302083	0.31425	0.513683	0.319242	0.247053	0.29456	0.297612	0.263914	0.277324	0.300445	0.328212	0.28773	0.310954	0.268596	0.292547	0.312573	0.251502	0.246555	0.380013	0.407609	0.313761	0.256008	0.264616	0.202889
CS8-H8	0.281437	0.217484	0.209402	0.233216	0.275242	0.301057	0.275578	0.315909	0.314439	0.172258	0.254049	0.248401	0.24747	0.221831	0.256404	0.242836	0.228997	0.280624	0.361434	0.257259	0.251815	0	0.286602	0.274962	0.289999	0.246256	0.334692	0.489776	0.267055	0.290887	0.307801	0.255486	0.233385	0.277863	0.266434	0.334509	0.226943	0.263838	0.256935	0.327136	0.23308	0.192607	0.316824	0.362019	0.345224	0.230061	0.299852	0.179809	0.284308
CS9-H8	0.359896	0.306069	0.254819	0.275332	0.359455	0.362289	0.306439	0.348993	0.313832	0.33769	0.238695	0.207869	0.289752	0.385724	0.277734	0.202363	0.318733	0.371846	0.449597	0.332134	0.347819	0.286602	0	0.284838	0.305456	0.308859	0.388777	0.47542	0.297784	0.279169	0.23436	0.221504	0.267116	0.33033	0.306165	0.409376	0.273933	0.316352	0.281756	0.409192	0.233251	0.282957	0.430522	0.273159	0.2736	0.234452	0.358544	0.222887	0.368839
TS1-H8	0.298949	0.196635	0.224069	0.244887	0.282282	0.285125	0.251955	0.251849	0.240175	0.275821	0.204478	0.316844	0.218715	0.23083	0.213177	0.275657	0.17994	0.256365	0.350034	0.223437	0.22263	0.274962	0.284838	0	0.248595	0.293211	0.285485	0.442923	0.269782	0.266481	0.230094	0.2456	0.245051	0.293379	0.295255	0.295149	0.241774	0.285217	0.256422	0.26192	0.257455	0.231769	0.280864	0.380137	0.343269	0.290598	0.2772	0.214269	0.283787
TS2-D5	0.209287	0.239129	0.303378	0.239579	0.22702	0.201122	0.214997	0.212855	0.277744	0.246282	0.226288	0.331698	0.163415	0.238385	0.297492	0.239219	0.20911	0.210164	0.316631	0.250189	0.295478	0.289999	0.305456	0.248595	0	0.225732	0.189974	0.409176	0.184483	0.185003	0.282441	0.229979	0.192937	0.206673	0.212356	0.27873	0.211137	0.235735	0.193132	0.260204	0.188731	0.238182	0.386428	0.362034	0.253328	0.212318	0.1944	0.227776	0.246297
TS3-D3	0.226427	0.228469	0.277101	0.238529	0.212897	0.240924	0.210377	0.265671	0.297852	0.220455	0.240783	0.281987	0.200939	0.200028	0.271226	0.293316	0.234219	0.271456	0.3695	0.28622	0.302083	0.246256	0.308859	0.293211	0.225732	0	0.309478	0.451608	0.208468	0.24629	0.310838	0.251035	0.197816	0.22442	0.225993	0.329473	0.262851	0.246757	0.200537	0.299663	0.21363	0.261535	0.363042	0.356109	0.324679	0.233269	0.245833	0.262464	0.24465
TS4-D3	0.227604	0.311371	0.356698	0.28478	0.261128	0.153791	0.272762	0.265477	0.256365	0.284846	0.289325	0.406386	0.192403	0.275387	0.344782	0.296298	0.268792	0.272693	0.346952	0.223363	0.31425	0.334692	0.388777	0.285485	0.189974	0.309478	0	0.435408	0.246205	0.228837	0.312329	0.285614	0.280667	0.234031	0.239017	0.249686	0.267773	0.29895	0.239486	0.259742	0.253931	0.294675	0.289509	0.340306	0.281031	0.286101	0.236019	0.293233	0.258024
TS6-D7	0.455988	0.4541	0.480301	0.48113	0.449942	0.383706	0.439503	0.423478	0.472679	0.480679	0.455017	0.470737	0.456949	0.477915	0.490827	0.422388	0.471343	0.434649	0.318343	0.415503	0.513683	0.489776	0.47542	0.442923	0.409176	0.451608	0.435408	0	0.425347	0.481054	0.438087	0.421147	0.460286	0.466544	0.472008	0.399841	0.425041	0.447276	0.443201	0.439522	0.438772	0.487581	0.525055	0.412033	0.39389	0.450797	0.507069	0.459026	0.496647
TS6-H8	0.196748	0.296974	0.28057	0.203781	0.226801	0.254805	0.162158	0.219585	0.278849	0.217104	0.233983	0.314903	0.179318	0.253543	0.257196	0.230362	0.271923	0.225628	0.330806	0.273696	0.319242	0.267055	0.297784	0.269782	0.184483	0.208468	0.246205	0.425347	0	0.229401	0.247401	0.202339	0.173266	0.178954	0.211815	0.283402	0.205342	0.234517	0.210026	0.254307	0.187479	0.248272	0.354211	0.364215	0.288683	0.1858	0.235184	0.217535	0.232715
WC1-D7	0.198064	0.288748	0.284901	0.201358	0.230327	0.234068	0.222222	0.251553	0.234022	0.216306	0.21264	0.32725	0.200179	0.252704	0.252565	0.275157	0.24016	0.275543	0.395543	0.259664	0.247053	0.290887	0.279169	0.266481	0.185003	0.24629	0.228837	0.481054	0.229401	0	0.242586	0.211401	0.220897	0.194449	0.192934	0.310272	0.225677	0.26426	0.215841	0.28087	0.221305	0.2241	0.322718	0.374085	0.308357	0.204948	0.167774	0.232554	0.212316
WC11-D7	0.279113	0.294859	0.253041	0.233455	0.300783	0.326271	0.281766	0.317524	0.234736	0.33168	0.188389	0.277612	0.26216	0.334163	0.238418	0.204543	0.331527	0.323856	0.443393	0.334686	0.29456	0.307801	0.23436	0.230094	0.282441	0.310838	0.312329	0.438087	0.247401	0.242586	0	0.241639	0.223375	0.25119	0.321248	0.379281	0.288853	0.295032	0.28239	0.314386	0.263908	0.286757	0.349546	0.305737	0.28591	0.249897	0.292074	0.255056	0.284792
WC2-D7	0.247013	0.264483	0.256719	0.200776	0.251028	0.259177	0.241814	0.214077	0.243964	0.259419	0.17306	0.289644	0.207276	0.281416	0.242206	0.233702	0.234481	0.306323	0.354947	0.240666	0.297612	0.255486	0.221504	0.2456	0.229979	0.251035	0.285614	0.421147	0.202339	0.211401	0.241639	0	0.189343	0.243743	0.184705	0.299652	0.171852	0.252842	0.241379	0.294797	0.176404	0.227024	0.36801	0.360552	0.308814	0.187732	0.278597	0.171341	0.283105
WC3-D7	0.22176	0.217193	0.256312	0.189593	0.206585	0.210086	0.179648	0.257175	0.222394	0.250843	0.167162	0.25892	0.147305	0.219396	0.207468	0.210644	0.261938	0.207178	0.349435	0.248356	0.263914	0.233385	0.267116	0.245051	0.192937	0.197816	0.280667	0.460286	0.173266	0.220897	0.223375	0.189343	0	0.146557	0.211387	0.287134	0.22124	0.184117	0.188351	0.252749	0.161609	0.170836	0.323655	0.32645	0.284858	0.169396	0.193585	0.214176	0.217885
WC4-D3	0.201041	0.280314	0.286534	0.189017	0.223911	0.22278	0.183706	0.292765	0.224493	0.242259	0.252679	0.333545	0.182995	0.240847	0.225566	0.263477	0.274056	0.226819	0.39053	0.273121	0.277324	0.277863	0.33033	0.293379	0.206673	0.22442	0.234031	0.466544	0.178954	0.194449	0.25119	0.243743	0.146557	0	0.235	0.300576	0.229402	0.212356	0.225607	0.252643	0.214582	0.198717	0.308831	0.369902	0.309075	0.212418	0.185624	0.261345	0.215326
WC5-D3	0.227223	0.301176	0.304045	0.2436	0.198296	0.263026	0.214653	0.25907	0.273353	0.279355	0.244581	0.338391	0.173242	0.270822	0.288322	0.283074	0.280214	0.30446	0.34266	0.287311	0.300445	0.266434	0.306165	0.295255	0.212356	0.225993	0.239017	0.472008	0.211815	0.192934	0.321248	0.184705	0.211387	0.235	0	0.29106	0.209187	0.219343	0.190388	0.286441	0.201321	0.236201	0.359325	0.383632	0.342791	0.215845	0.198854	0.227414	0.250826
WC5-D7	0.325054	0.276303	0.357298	0.334352	0.340616	0.23571	0.264506	0.234347	0.346838	0.265256	0.331349	0.447166	0.275266	0.263059	0.318709	0.388497	0.270288	0.222549	0.224552	0.173746	0.328212	0.334509	0.409376	0.295149	0.27873	0.329473	0.249686	0.399841	0.283402	0.310272	0.379281	0.299652	0.287134	0.300576	0.29106	0	0.235919	0.346465	0.293665	0.231583	0.326093	0.266461	0.347725	0.433897	0.334078	0.345803	0.309472	0.302198	0.315051
WC6-D3	0.248061	0.231183	0.229656	0.25586	0.294273	0.269248	0.251359	0.244497	0.302961	0.192001	0.261972	0.316159	0.199673	0.246089	0.220865	0.228775	0.222901	0.211973	0.274773	0.192962	0.28773	0.226943	0.273933	0.241774	0.211137	0.262851	0.267773	0.425041	0.205342	0.225677	0.288853	0.171852	0.22124	0.229402	0.209187	0.235919	0	0.280178	0.266307	0.245781	0.225616	0.186337	0.350829	0.349453	0.307997	0.222485	0.275791	0.142598	0.293547
WC8-D3	0.253194	0.263537	0.302549	0.245523	0.234726	0.287888	0.198902	0.322719	0.258322	0.298855	0.260595	0.325032	0.192505	0.28612	0.235422	0.280487	0.306165	0.293704	0.382244	0.303658	0.310954	0.263838	0.316352	0.285217	0.235735	0.246757	0.29895	0.447276	0.234517	0.26426	0.295032	0.252842	0.184117	0.212356	0.219343	0.346465	0.280178	0	0.220855	0.283341	0.179067	0.237337	0.32642	0.352962	0.307278	0.249939	0.246738	0.243625	0.268819
WT10-H8	0.256762	0.247133	0.286675	0.244149	0.241919	0.190506	0.187814	0.262153	0.276467	0.263453	0.199279	0.282051	0.137523	0.220579	0.239137	0.272345	0.241654	0.219985	0.355812	0.278168	0.268596	0.256935	0.281756	0.256422	0.193132	0.200537	0.239486	0.443201	0.210026	0.215841	0.28239	0.241379	0.188351	0.225607	0.190388	0.293665	0.266307	0.220855	0	0.276231	0.196291	0.191555	0.354914	0.372021	0.301522	0.202832	0.208668	0.249019	0.217881
WT4-D3	0.267925	0.254911	0.305192	0.307706	0.310601	0.268176	0.28556	0.281811	0.296882	0.275468	0.3054	0.408422	0.260864	0.219509	0.289506	0.344457	0.259289	0.197882	0.334484	0.238948	0.292547	0.327136	0.409192	0.26192	0.260204	0.299663	0.259742	0.439522	0.254307	0.28087	0.314386	0.294797	0.252749	0.252643	0.286441	0.231583	0.245781	0.283341	0.276231	0	0.264736	0.240056	0.327895	0.406664	0.336183	0.29855	0.26502	0.253424	0.287633
WT4-H0	0.238774	0.251147	0.243946	0.231955	0.262631	0.250651	0.201449	0.280645	0.222893	0.236255	0.223008	0.262299	0.172669	0.295621	0.239893	0.211155	0.255857	0.258631	0.356996	0.264601	0.312573	0.23308	0.233251	0.257455	0.188731	0.21363	0.253931	0.438772	0.187479	0.221305	0.263908	0.176404	0.161609	0.214582	0.201321	0.326093	0.225616	0.179067	0.196291	0.264736	0	0.184156	0.349223	0.333428	0.266733	0.165021	0.245687	0.174925	0.277953
WT7-D5	0.293933	0.215911	0.222641	0.247731	0.276041	0.269437	0.233572	0.30311	0.255719	0.199374	0.232066	0.280773	0.199375	0.222126	0.195116	0.265041	0.224969	0.215496	0.358019	0.202362	0.251502	0.192607	0.282957	0.231769	0.238182	0.261535	0.294675	0.487581	0.248272	0.2241	0.286757	0.227024	0.170836	0.198717	0.236201	0.266461	0.186337	0.237337	0.191555	0.240056	0.184156	0	0.312361	0.380951	0.33554	0.202008	0.245502	0.162242	0.246167
WT8-H8	0.341758	0.327289	0.332046	0.298988	0.340308	0.297242	0.359574	0.376686	0.293398	0.323949	0.339328	0.431714	0.324785	0.276911	0.264217	0.416399	0.292309	0.336332	0.426631	0.283435	0.246555	0.316824	0.430522	0.280864	0.386428	0.363042	0.289509	0.525055	0.354211	0.322718	0.349546	0.36801	0.323655	0.308831	0.359325	0.347725	0.350829	0.32642	0.354914	0.327895	0.349223	0.312361	0	0.428045	0.417447	0.392433	0.324048	0.349895	0.325329
WT9-D7	0.36469	0.351556	0.319203	0.364907	0.339686	0.339318	0.382944	0.429945	0.352238	0.397115	0.338428	0.279252	0.357632	0.411755	0.384025	0.206158	0.427396	0.389811	0.454154	0.36861	0.380013	0.362019	0.273159	0.380137	0.362034	0.356109	0.340306	0.412033	0.364215	0.374085	0.305737	0.360552	0.32645	0.369902	0.383632	0.433897	0.349453	0.352962	0.372021	0.406664	0.333428	0.380951	0.428045	0	0.22696	0.319475	0.384695	0.343871	0.382046
CS10-D5	0.302818	0.302333	0.324425	0.361945	0.333161	0.282108	0.309901	0.347678	0.344403	0.354588	0.26438	0.267202	0.302509	0.38762	0.356028	0.252769	0.346305	0.336469	0.358203	0.275972	0.407609	0.345224	0.2736	0.343269	0.253328	0.324679	0.281031	0.39389	0.288683	0.308357	0.28591	0.308814	0.284858	0.309075	0.342791	0.334078	0.307997	0.307278	0.301522	0.336183	0.266733	0.33554	0.417447	0.22696	0	0.273062	0.316407	0.292919	0.387841
CS12-D7	0.252946	0.287175	0.268562	0.218063	0.249468	0.258464	0.212205	0.297822	0.258048	0.230299	0.217779	0.207888	0.198039	0.271076	0.26642	0.184466	0.286995	0.250234	0.370342	0.261379	0.313761	0.230061	0.234452	0.290598	0.212318	0.233269	0.286101	0.450797	0.1858	0.204948	0.249897	0.187732	0.169396	0.212418	0.215845	0.345803	0.222485	0.249939	0.202832	0.29855	0.165021	0.202008	0.392433	0.319475	0.273062	0	0.219686	0.189318	0.260264
CS4-D7	0.224119	0.284387	0.302412	0.219515	0.224235	0.224704	0.225935	0.261144	0.24246	0.258586	0.240087	0.34876	0.157913	0.251797	0.283847	0.299524	0.275253	0.235473	0.402556	0.287547	0.256008	0.299852	0.358544	0.2772	0.1944	0.245833	0.236019	0.507069	0.235184	0.167774	0.292074	0.278597	0.193585	0.185624	0.198854	0.309472	0.275791	0.246738	0.208668	0.26502	0.245687	0.245502	0.324048	0.384695	0.316407	0.219686	0	0.292469	0.156107
CS6-H8	0.261446	0.187416	0.166268	0.260044	0.277841	0.297047	0.235524	0.31803	0.294491	0.186504	0.219365	0.254826	0.205251	0.245026	0.199318	0.219993	0.217004	0.260109	0.338757	0.20447	0.264616	0.179809	0.222887	0.214269	0.227776	0.262464	0.293233	0.459026	0.217535	0.232554	0.255056	0.171341	0.214176	0.261345	0.227414	0.302198	0.142598	0.243625	0.249019	0.253424	0.174925	0.162242	0.349895	0.343871	0.292919	0.189318	0.292469	0	0.295699
CS8-H0	0.22747	0.277991	0.272273	0.184443	0.165653	0.216224	0.226167	0.282877	0.239613	0.278569	0.209575	0.365579	0.156146	0.193876	0.27167	0.300756	0.295338	0.250933	0.426576	0.263544	0.202889	0.284308	0.368839	0.283787	0.246297	0.24465	0.258024	0.496647	0.232715	0.212316	0.284792	0.283105	0.217885	0.215326	0.250826	0.315051	0.293547	0.268819	0.217881	0.287633	0.277953	0.246167	0.325329	0.382046	0.387841	0.260264	0.156107	0.295699	0
CS9-D7	0.166228	0.232015	0.345489	0.284535	0.211146	0.213646	0.18826	0.167458	0.263504	0.188696	0.252212	0.308374	0.185678	0.208734	0.284056	0.279264	0.228038	0.207713	0.368144	0.273668	0.284777	0.264195	0.368218	0.291858	0.213757	0.21694	0.2194	0.433745	0.179181	0.218518	0.28425	0.281344	0.204555	0.188924	0.25308	0.271979	0.262965	0.253247	0.216591	0.266005	0.261224	0.269775	0.322379	0.37047	0.298955	0.260947	0.19444	0.293091	0.218468
TS2-D7	0.238136	0.161256	0.279978	0.280078	0.299147	0.233856	0.255918	0.221052	0.28952	0.20789	0.283654	0.355615	0.216465	0.174896	0.275151	0.337543	0.166634	0.238607	0.346176	0.216905	0.288748	0.22125	0.352449	0.227768	0.22132	0.273036	0.245996	0.494254	0.269416	0.235091	0.336814	0.285935	0.26193	0.246151	0.248887	0.230669	0.231635	0.282867	0.234302	0.235873	0.259974	0.200415	0.317866	0.45386	0.377643	0.285907	0.220804	0.229425	0.236609
TS3-D5	0.300692	0.235247	0.246261	0.340017	0.305518	0.341041	0.354399	0.347857	0.280024	0.315763	0.320108	0.354531	0.362016	0.274687	0.338193	0.282362	0.323345	0.269619	0.420925	0.310864	0.303272	0.324868	0.341618	0.276425	0.323639	0.348997	0.338051	0.435681	0.354012	0.290666	0.291994	0.353406	0.329177	0.316256	0.375313	0.338975	0.29353	0.373194	0.363467	0.262271	0.341279	0.312246	0.40001	0.319006	0.336188	0.314533	0.320452	0.275657	0.300373
TS3-H0	0.280646	0.256517	0.270676	0.275912	0.315693	0.348136	0.28428	0.292656	0.250569	0.289483	0.247282	0.210965	0.293614	0.312041	0.298634	0.246257	0.316328	0.291483	0.423081	0.319455	0.375691	0.284327	0.261326	0.317316	0.282911	0.233432	0.347463	0.479706	0.253732	0.280727	0.215965	0.259518	0.211002	0.228219	0.313971	0.373487	0.267042	0.302061	0.302353	0.280609	0.204608	0.234935	0.392881	0.316013	0.259319	0.212632	0.299387	0.26846	0.325771
TS4-D5	0.241271	0.260335	0.271541	0.21226	0.202755	0.222843	0.16772	0.27508	0.225571	0.221046	0.218955	0.275712	0.168254	0.280974	0.264635	0.250046	0.275937	0.254846	0.37076	0.266175	0.303062	0.255825	0.299572	0.267389	0.209568	0.196517	0.223353	0.466912	0.206997	0.179221	0.262172	0.242619	0.191812	0.187839	0.192894	0.308587	0.253278	0.217215	0.185666	0.288991	0.165499	0.218689	0.346187	0.358392	0.284498	0.161175	0.170899	0.235026	0.232389
TS5-H8	0.292918	0.298712	0.300586	0.269648	0.240728	0.314948	0.220648	0.286674	0.29345	0.258	0.303383	0.327012	0.252193	0.329481	0.306809	0.264281	0.348838	0.299518	0.357356	0.337016	0.337705	0.304034	0.329697	0.320995	0.231571	0.263554	0.336514	0.427326	0.223079	0.239778	0.29945	0.259395	0.236116	0.246995	0.206657	0.312845	0.254801	0.262026	0.268352	0.346917	0.229366	0.275391	0.420014	0.35583	0.344889	0.205477	0.25943	0.279043	0.278601
TS6-D3	0.2645	0.244056	0.217408	0.221048	0.29349	0.2926	0.235642	0.281573	0.2325	0.195194	0.210408	0.293686	0.230182	0.254266	0.228711	0.244769	0.219859	0.239321	0.354629	0.224372	0.201947	0.21897	0.251241	0.168596	0.243786	0.291345	0.291634	0.486319	0.229983	0.183791	0.251642	0.230584	0.217059	0.245695	0.271868	0.289539	0.21525	0.283829	0.248503	0.263235	0.210101	0.180816	0.305138	0.35177	0.308503	0.212473	0.255024	0.180197	0.286101
WC10-H8	0.263994	0.227085	0.233979	0.187888	0.244949	0.22811	0.260794	0.254811	0.280529	0.240283	0.237892	0.371803	0.199506	0.163387	0.217443	0.314648	0.187984	0.21021	0.375088	0.25009	0.143534	0.261668	0.351724	0.176244	0.246764	0.277167	0.270131	0.47111	0.266467	0.206213	0.270892	0.260225	0.249759	0.254815	0.294711	0.262692	0.253761	0.309216	0.254017	0.220803	0.282968	0.236158	0.266681	0.404739	0.40449	0.293709	0.2346	0.254917	0.180916
WC4-D7	0.185816	0.222715	0.29712	0.229748	0.221517	0.213582	0.197953	0.210129	0.227372	0.24577	0.220052	0.333528	0.145731	0.217962	0.30365	0.242083	0.209614	0.213841	0.328095	0.251587	0.284929	0.293573	0.325756	0.226852	0.123856	0.259312	0.163395	0.427017	0.206138	0.176489	0.285952	0.23109	0.19713	0.198894	0.216326	0.283355	0.219015	0.229999	0.193222	0.229952	0.209345	0.254636	0.352916	0.345893	0.277206	0.208356	0.175923	0.225862	0.227681
WC4-H8	0.23176	0.181239	0.273156	0.253443	0.266885	0.292267	0.233134	0.198256	0.25389	0.186157	0.221499	0.319245	0.223007	0.194188	0.206933	0.253458	0.171517	0.230274	0.328262	0.234914	0.251347	0.223481	0.30091	0.211555	0.231591	0.239986	0.289223	0.4856	0.23287	0.238259	0.248892	0.226366	0.202906	0.227697	0.275425	0.26212	0.205074	0.23884	0.304376	0.245166	0.248703	0.216358	0.297716	0.372095	0.317635	0.287361	0.265929	0.223573	0.284245
WC5-H8	0.220394	0.262449	0.316834	0.231429	0.270976	0.304664	0.218167	0.179099	0.264806	0.237439	0.245578	0.27605	0.206999	0.266993	0.239444	0.278142	0.23423	0.302445	0.365526	0.3054	0.299808	0.253897	0.27345	0.296318	0.226993	0.227823	0.301182	0.462015	0.219588	0.224126	0.268976	0.180209	0.21471	0.225199	0.205118	0.298178	0.229122	0.223854	0.229061	0.326586	0.208006	0.2433	0.347881	0.394809	0.321136	0.239436	0.263815	0.238876	0.286761
WT10-D3	0.253184	0.283166	0.275352	0.225259	0.241558	0.234332	0.159302	0.251704	0.238331	0.203105	0.222642	0.307583	0.178602	0.275153	0.266464	0.243412	0.289381	0.246866	0.340836	0.282576	0.308092	0.25987	0.302468	0.270164	0.232194	0.210943	0.247315	0.472473	0.146433	0.194058	0.237397	0.261609	0.192658	0.197895	0.198391	0.278796	0.256592	0.242492	0.193671	0.277671	0.186165	0.232482	0.348981	0.352269	0.314907	0.202178	0.197116	0.246258	0.228098
WT3-D7	0.263409	0.31699	0.349573	0.270283	0.257555	0.32013	0.23398	0.270086	0.253958	0.291828	0.2688	0.358416	0.264121	0.31493	0.311768	0.31213	0.315847	0.304451	0.398337	0.349911	0.334901	0.344084	0.323405	0.299023	0.252776	0.285034	0.326575	0.420299	0.219519	0.183402	0.255178	0.265154	0.286519	0.271254	0.252073	0.360083	0.298432	0.248314	0.266747	0.303615	0.278656	0.30606	0.359487	0.376461	0.331347	0.24282	0.25926	0.294748	0.281644
CS1-D3	0.243783	0.194955	0.238207	0.233653	0.246469	0.213211	0.256837	0.290998	0.237413	0.227633	0.243383	0.376939	0.178826	0.145249	0.188891	0.314601	0.204936	0.179427	0.325866	0.204798	0.204496	0.245474	0.366826	0.243851	0.20972	0.251219	0.23122	0.481089	0.259958	0.236535	0.326844	0.260075	0.204956	0.209817	0.251341	0.256029	0.207058	0.25372	0.207515	0.202796	0.22632	0.191971	0.254677	0.400427	0.364691	0.268415	0.235907	0.208655	0.211518
CS3-D3	0.248028	0.215504	0.230291	0.243183	0.23743	0.24759	0.249648	0.273403	0.272054	0.306673	0.212213	0.241638	0.204012	0.242097	0.28843	0.198507	0.230606	0.228666	0.367231	0.275015	0.300085	0.300933	0.258109	0.214715	0.183102	0.229715	0.265256	0.39477	0.239732	0.244296	0.276086	0.204193	0.21013	0.270409	0.258145	0.332743	0.235453	0.263632	0.219347	0.275876	0.196544	0.2605	0.386002	0.285163	0.227775	0.202702	0.266698	0.227995	0.278116
CS5-D3	0.22752	0.282653	0.274379	0.199591	0.213007	0.256388	0.163761	0.211012	0.225891	0.245638	0.198247	0.306711	0.178618	0.241287	0.252204	0.233638	0.236585	0.249294	0.38927	0.259946	0.2062	0.272047	0.276566	0.211048	0.189245	0.249581	0.234892	0.4443	0.194971	0.153458	0.229321	0.219926	0.205602	0.222486	0.24781	0.314547	0.248253	0.230436	0.222314	0.301491	0.207062	0.232755	0.298519	0.34843	0.290524	0.256014	0.230064	0.239779	0.226457
CS6-H0	0.241399	0.194649	0.319688	0.256608	0.225263	0.180798	0.21706	0.190178	0.261535	0.220999	0.226137	0.296941	0.149573	0.153764	0.260337	0.302667	0.212236	0.219528	0.35267	0.224198	0.273211	0.258107	0.327598	0.265376	0.190345	0.191657	0.218818	0.439741	0.253925	0.23194	0.311121	0.227335	0.198563	0.220917	0.211365	0.245803	0.246183	0.239104	0.136289	0.267654	0.241418	0.216848	0.327772	0.394517	0.340502	0.239025	0.208142	0.268414	0.213565
TS2-H0	0.278975	0.239945	0.317392	0.315309	0.321903	0.227701	0.308716	0.322288	0.296455	0.285487	0.318166	0.431848	0.286621	0.239204	0.301726	0.359055	0.283382	0.259385	0.308039	0.204708	0.313546	0.338628	0.407136	0.23862	0.258015	0.321271	0.211909	0.421952	0.277546	0.272501	0.323576	0.31239	0.28579	0.260472	0.301652	0.207152	0.253929	0.321561	0.275414	0.167602	0.315458	0.271265	0.286016	0.37278	0.301136	0.299245	0.266267	0.277145	0.293533
TS8-H0	0.260657	0.254391	0.311184	0.265087	0.265792	0.256719	0.236575	0.186368	0.283127	0.277723	0.251818	0.322664	0.221021	0.282508	0.337372	0.256944	0.264889	0.264245	0.325585	0.25361	0.328832	0.3076	0.300464	0.240721	0.167752	0.278086	0.246039	0.396557	0.229428	0.2485	0.316454	0.207406	0.213722	0.241323	0.217161	0.261424	0.206607	0.261788	0.237016	0.269751	0.235924	0.277009	0.400201	0.350765	0.262839	0.238578	0.249261	0.270991	0.29722
WC4-D5	0.229246	0.260062	0.252645	0.190924	0.240607	0.246316	0.204923	0.309003	0.222013	0.240829	0.238821	0.243958	0.179102	0.271191	0.221883	0.221768	0.277679	0.260291	0.36471	0.273955	0.275416	0.231886	0.258181	0.263998	0.203979	0.201782	0.271522	0.442966	0.194429	0.220466	0.252498	0.192432	0.145819	0.170056	0.224781	0.344291	0.226689	0.195193	0.230096	0.261785	0.140294	0.199442	0.32829	0.330007	0.311428	0.15461	0.218889	0.191278	0.235382
WT2-D3	0.295804	0.311657	0.314693	0.28556	0.307961	0.226621	0.283663	0.335479	0.313377	0.208729	0.343084	0.403046	0.272853	0.288699	0.270418	0.331514	0.312759	0.255092	0.31972	0.218588	0.298997	0.292851	0.385533	0.324702	0.290189	0.329681	0.243601	0.470471	0.268031	0.261532	0.348979	0.324253	0.274274	0.238491	0.311729	0.218752	0.249405	0.335212	0.322763	0.281641	0.310256	0.26689	0.298018	0.356442	0.350149	0.255483	0.240966	0.26906	0.282219
WT7-H0	0.194721	0.233591	0.250431	0.177589	0.199764	0.208021	0.20648	0.280704	0.232824	0.247714	0.224243	0.281765	0.134436	0.223442	0.192973	0.230735	0.259191	0.255443	0.380878	0.255658	0.242831	0.232337	0.281827	0.24786	0.207251	0.223248	0.241878	0.419004	0.157031	0.220114	0.224578	0.178377	0.141154	0.165161	0.205549	0.308975	0.2151	0.151976	0.170545	0.263719	0.188286	0.198604	0.31466	0.330751	0.307053	0.18286	0.193122	0.18352	0.192257
CS2-H8	0.22474	0.166909	0.278567	0.262572	0.288114	0.233848	0.261084	0.226534	0.288196	0.217124	0.2495	0.314468	0.176676	0.135935	0.241717	0.306674	0.187034	0.194597	0.334053	0.238433	0.22657	0.238714	0.362018	0.227085	0.209516	0.247868	0.247126	0.506544	0.266741	0.258091	0.336012	0.278016	0.230398	0.263968	0.248691	0.273267	0.225326	0.284687	0.211816	0.239727	0.267944	0.208073	0.303339	0.4021	0.360728	0.246956	0.202304	0.246136	0.227551
CS9-D3	0.240561	0.233238	0.305115	0.270114	0.253301	0.21435	0.1246	0.195948	0.27618	0.220685	0.206005	0.322034	0.137863	0.217594	0.291141	0.255569	0.222972	0.200877	0.319071	0.236918	0.288676	0.298465	0.31315	0.217493	0.151477	0.277863	0.222373	0.417833	0.192871	0.207447	0.274388	0.243453	0.205748	0.211682	0.234567	0.242054	0.244882	0.224988	0.177509	0.26215	0.228987	0.221485	0.372983	0.388565	0.316351	0.227521	0.222771	0.235333	0.222955
CS9-H0	0.197972	0.288349	0.304388	0.189603	0.192083	0.290583	0.292622	0.277732	0.223891	0.284834	0.249976	0.343907	0.261633	0.205006	0.284777	0.333047	0.249437	0.316111	0.466079	0.317551	0.231182	0.276649	0.369978	0.266472	0.275459	0.234073	0.275364	0.494176	0.259123	0.195331	0.267978	0.275106	0.253419	0.233831	0.270615	0.389527	0.326497	0.279674	0.268445	0.317163	0.302794	0.295663	0.265493	0.39077	0.370457	0.294604	0.231124	0.31468	0.205051
TS8-H8	0.363513	0.291885	0.31913	0.375164	0.371948	0.389079	0.314895	0.347674	0.325529	0.302767	0.337485	0.370014	0.33771	0.361149	0.318652	0.314551	0.341493	0.317471	0.266566	0.300217	0.379109	0.295943	0.342009	0.319055	0.324086	0.348145	0.398919	0.395755	0.333357	0.340489	0.370565	0.293659	0.277193	0.310224	0.307792	0.322327	0.234502	0.307757	0.344286	0.328044	0.281363	0.236019	0.437959	0.432395	0.364172	0.315343	0.364656	0.248444	0.403784
WC2-H8	0.274162	0.297717	0.267386	0.193306	0.278918	0.30648	0.257847	0.322948	0.235545	0.308656	0.228674	0.336369	0.220056	0.310824	0.240917	0.258653	0.26908	0.312463	0.413054	0.316736	0.292623	0.294706	0.263667	0.273948	0.258853	0.263857	0.307972	0.512748	0.252424	0.22411	0.258426	0.220613	0.19904	0.228018	0.222087	0.341412	0.273758	0.232403	0.232649	0.279902	0.202599	0.209678	0.354631	0.364123	0.346434	0.237236	0.225023	0.267196	0.244874
WC7-D3	0.210143	0.273963	0.295901	0.244486	0.238336	0.237876	0.197426	0.205543	0.21651	0.263109	0.230889	0.309189	0.167684	0.279254	0.250169	0.246119	0.2563	0.219048	0.318219	0.250143	0.304856	0.306297	0.322522	0.24977	0.165615	0.246555	0.216012	0.414041	0.19127	0.203928	0.274093	0.192109	0.164278	0.183134	0.171037	0.261795	0.165555	0.211096	0.237138	0.262325	0.17271	0.225638	0.31195	0.353649	0.291407	0.210545	0.208864	0.24536	0.265154
WC7-D7	0.36613	0.27288	0.268672	0.317106	0.304702	0.321232	0.30616	0.418271	0.353322	0.339681	0.353429	0.384736	0.281317	0.254448	0.318155	0.321513	0.275939	0.292677	0.414177	0.356011	0.273815	0.298537	0.375617	0.26262	0.270131	0.327147	0.351248	0.476088	0.338317	0.33061	0.341897	0.348723	0.303348	0.334204	0.334117	0.385324	0.322127	0.302281	0.282146	0.33408	0.303615	0.291829	0.363725	0.42168	0.439831	0.317323	0.32385	0.264295	0.304311
WC9-D3	0.203999	0.248277	0.249831	0.218586	0.222351	0.246057	0.203033	0.285621	0.230858	0.217491	0.241703	0.274308	0.183438	0.263154	0.27029	0.210928	0.2657	0.2652	0.376224	0.261664	0.281763	0.252822	0.259478	0.262964	0.191592	0.240653	0.241471	0.424326	0.160582	0.194953	0.248902	0.200107	0.178201	0.189126	0.213554	0.308681	0.220232	0.201392	0.220902	0.285376	0.169746	0.215641	0.361754	0.307154	0.299881	0.18501	0.240904	0.181742	0.225934
WT3-D3	0.246901	0.191844	0.225298	0.270405	0.324378	0.274693	0.253236	0.262648	0.274483	0.174068	0.246663	0.26004	0.228046	0.201653	0.237532	0.261648	0.186547	0.240224	0.364665	0.224159	0.304523	0.176426	0.265848	0.241048	0.257233	0.248465	0.293398	0.467629	0.247656	0.262498	0.302815	0.224751	0.226164	0.241716	0.25785	0.279635	0.16767	0.264763	0.245928	0.28581	0.203438	0.158488	0.323827	0.356669	0.307469	0.218195	0.265219	0.171533	0.297325
WT5-D3	0.247573	0.306899	0.316872	0.231753	0.273347	0.285694	0.239194	0.197121	0.243791	0.285641	0.208093	0.330722	0.227686	0.2818	0.291459	0.269286	0.258934	0.275526	0.365298	0.281818	0.318664	0.291978	0.250474	0.260043	0.196855	0.254273	0.256526	0.440155	0.19885	0.191659	0.245347	0.16149	0.209652	0.231092	0.161149	0.279617	0.198479	0.269391	0.217028	0.293302	0.207061	0.25071	0.385003	0.371823	0.3014	0.208536	0.254592	0.222473	0.283218
WT8-D7	0.326432	0.348497	0.354508	0.27783	0.320127	0.326283	0.269338	0.282391	0.254083	0.302848	0.275447	0.322573	0.283247	0.337433	0.301108	0.317792	0.325911	0.278097	0.419954	0.328039	0.326086	0.354723	0.312759	0.30765	0.292375	0.333423	0.344109	0.506247	0.267041	0.1927	0.291589	0.26901	0.262073	0.255776	0.292963	0.350288	0.289247	0.299512	0.289118	0.30493	0.283446	0.259482	0.376436	0.400858	0.351458	0.232932	0.23524	0.300879	0.296461
WT9-H0	0.275487	0.280326	0.255965	0.177982	0.23063	0.261432	0.186632	0.293279	0.245618	0.253562	0.216134	0.295336	0.200868	0.267023	0.233306	0.235013	0.268819	0.283952	0.367917	0.291779	0.244603	0.239946	0.246489	0.257584	0.236701	0.221141	0.292895	0.475603	0.195702	0.177237	0.227993	0.191548	0.184963	0.19814	0.212072	0.339342	0.245635	0.220495	0.205875	0.300221	0.216689	0.229015	0.326934	0.339892	0.349827	0.221755	0.264927	0.216331	0.266542
CS2-D3	0.199487	0.244932	0.25752	0.219085	0.19682	0.21581	0.205415	0.281622	0.262166	0.25109	0.213184	0.269325	0.140779	0.248232	0.232497	0.197892	0.25967	0.265812	0.373055	0.275697	0.243423	0.261067	0.298134	0.227113	0.163882	0.230137	0.230058	0.424584	0.193685	0.201024	0.22513	0.221612	0.162303	0.191867	0.215377	0.350964	0.230934	0.175487	0.199796	0.289188	0.176532	0.237896	0.309546	0.307997	0.274189	0.214951	0.200414	0.235139	0.222911
CS4-D3	0.205407	0.258584	0.291822	0.223742	0.207445	0.201786	0.170118	0.245424	0.230718	0.22354	0.210423	0.322369	0.142268	0.222195	0.235173	0.233265	0.269012	0.234084	0.372613	0.249897	0.262803	0.2709	0.307201	0.271238	0.153398	0.209819	0.210556	0.414451	0.165538	0.196782	0.218138	0.217916	0.187339	0.141012	0.203877	0.288295	0.209234	0.213116	0.152405	0.252209	0.213303	0.185726	0.330747	0.344822	0.279744	0.204088	0.198255	0.235755	0.198378
CS6-D7	0.171407	0.255623	0.257291	0.19534	0.196576	0.194413	0.197917	0.267719	0.230187	0.242053	0.184043	0.313417	0.137351	0.179413	0.241181	0.271976	0.256615	0.25578	0.404569	0.230912	0.224717	0.258945	0.32513	0.266168	0.217677	0.207141	0.207912	0.46738	0.182574	0.180737	0.246883	0.224176	0.170869	0.156603	0.20434	0.30354	0.230268	0.222144	0.171764	0.240909	0.21322	0.219574	0.291496	0.359452	0.318482	0.217694	0.188307	0.237613	0.13468
WT2-H8	0.276824	0.265468	0.327557	0.213686	0.285264	0.203267	0.189251	0.218096	0.23605	0.283588	0.199923	0.331588	0.135127	0.235557	0.218761	0.314623	0.200026	0.227934	0.354076	0.271558	0.253417	0.294929	0.28193	0.227868	0.21123	0.269659	0.247624	0.481669	0.243378	0.206963	0.299383	0.23233	0.186023	0.220681	0.234972	0.278319	0.266548	0.20005	0.161324	0.274049	0.200236	0.233082	0.299934	0.428017	0.352144	0.225032	0.215222	0.263471	0.231035
WT5-H0	0.327726	0.317696	0.31347	0.28819	0.308271	0.316787	0.291691	0.316014	0.332392	0.313741	0.310649	0.347496	0.254423	0.342516	0.27889	0.317448	0.340479	0.348466	0.315271	0.317519	0.334087	0.353649	0.342404	0.341663	0.322987	0.284864	0.368525	0.358345	0.288776	0.306711	0.353174	0.226775	0.25961	0.290182	0.275476	0.357301	0.237844	0.315943	0.306278	0.368443	0.269717	0.284588	0.418363	0.41456	0.400233	0.286675	0.306585	0.285909	0.307566
CS11-D7	0.312371	0.299455	0.246157	0.202029	0.263463	0.321902	0.308823	0.316625	0.265956	0.273731	0.167502	0.231495	0.277359	0.31468	0.283739	0.259016	0.297295	0.339744	0.470566	0.298401	0.294373	0.273726	0.224681	0.292621	0.281023	0.282655	0.335206	0.502445	0.26359	0.214893	0.23175	0.225901	0.237699	0.284839	0.302848	0.391567	0.310826	0.303167	0.255871	0.364003	0.252154	0.250693	0.390452	0.317625	0.287998	0.180051	0.284544	0.235959	0.259458
CS5-D7	0.175077	0.212385	0.283232	0.218195	0.219385	0.2016	0.16143	0.199172	0.274926	0.198328	0.203268	0.25913	0.133714	0.16207	0.268585	0.267163	0.190056	0.241239	0.356674	0.252103	0.294233	0.21357	0.283441	0.258962	0.169933	0.147334	0.243069	0.449791	0.159461	0.215341	0.290711	0.197047	0.169544	0.221917	0.187724	0.287524	0.241657	0.206641	0.160867	0.269243	0.162663	0.227166	0.352233	0.387497	0.300014	0.194308	0.215047	0.209821	0.205552
CS8-D7	0.210238	0.291506	0.287224	0.21594	0.224905	0.251554	0.154129	0.243912	0.278412	0.210479	0.248496	0.32781	0.181738	0.246863	0.293637	0.254124	0.260683	0.250341	0.380806	0.26715	0.275794	0.262966	0.325544	0.264358	0.205122	0.245233	0.253655	0.446415	0.175159	0.216777	0.295823	0.255858	0.206811	0.201328	0.236022	0.280623	0.243219	0.222535	0.249859	0.291106	0.220543	0.240485	0.373387	0.339677	0.343553	0.227225	0.225453	0.240728	0.202027
TS1-D7	0.280594	0.352206	0.335976	0.272258	0.266129	0.237146	0.220395	0.301729	0.337662	0.285271	0.323576	0.396061	0.221108	0.302781	0.327673	0.301791	0.327404	0.284655	0.374764	0.275798	0.266048	0.338258	0.389689	0.308601	0.27062	0.303215	0.207415	0.406135	0.240257	0.310653	0.343615	0.306218	0.278925	0.284362	0.316968	0.260097	0.301721	0.297694	0.291142	0.329692	0.303033	0.327084	0.321117	0.311772	0.332792	0.334559	0.301423	0.312052	0.255191
TS1-H0	0.249305	0.265332	0.349725	0.29463	0.229153	0.243221	0.195004	0.238482	0.274312	0.259809	0.285316	0.384048	0.231995	0.273308	0.327629	0.315405	0.273067	0.239853	0.294132	0.29518	0.348288	0.359196	0.39151	0.292387	0.199426	0.282328	0.252191	0.401526	0.233607	0.211517	0.328122	0.28489	0.259193	0.256387	0.27075	0.275816	0.289834	0.2915	0.231669	0.271367	0.259848	0.291184	0.408696	0.416829	0.3417	0.254024	0.209297	0.308702	0.239591
TS4-D7	0.204771	0.244897	0.296199	0.236543	0.187693	0.213339	0.118588	0.182862	0.230631	0.228657	0.215186	0.329805	0.138716	0.23077	0.262681	0.234361	0.236529	0.198623	0.304844	0.234351	0.271456	0.264361	0.306702	0.258159	0.18515	0.206496	0.204012	0.447481	0.138807	0.208776	0.293825	0.229702	0.161687	0.194464	0.182257	0.226775	0.224382	0.214227	0.1585	0.254727	0.20785	0.230592	0.357156	0.351132	0.286229	0.219653	0.188877	0.232263	0.203191
WC10-D5	0.21871	0.246411	0.267687	0.219681	0.207819	0.227401	0.197726	0.259345	0.219121	0.21993	0.214414	0.249782	0.173093	0.256848	0.227813	0.218884	0.274832	0.267198	0.36714	0.242324	0.271486	0.259765	0.266827	0.243507	0.188162	0.205765	0.231457	0.445884	0.182282	0.198311	0.232762	0.195217	0.152331	0.193728	0.189385	0.3115	0.209423	0.217776	0.226628	0.269988	0.183818	0.212993	0.318959	0.337408	0.305569	0.152412	0.165069	0.193049	0.225376
WT6-H8	0.259821	0.303727	0.282404	0.179974	0.242863	0.269319	0.161078	0.250529	0.208815	0.248149	0.228379	0.313213	0.175303	0.27447	0.226694	0.264855	0.277379	0.232895	0.396157	0.299316	0.254252	0.26713	0.271971	0.254597	0.225395	0.242852	0.249052	0.476814	0.184665	0.189733	0.247374	0.232305	0.186293	0.158567	0.217321	0.313923	0.243434	0.194224	0.231707	0.28869	0.200506	0.193973	0.290195	0.368239	0.345194	0.249698	0.231863	0.262143	0.229218
WT8-H0	0.273382	0.224993	0.20793	0.228043	0.298988	0.285731	0.221807	0.330396	0.268707	0.226574	0.243785	0.282527	0.207645	0.253526	0.174405	0.263886	0.246907	0.243518	0.34138	0.256323	0.272442	0.176443	0.278192	0.200576	0.262128	0.247435	0.319626	0.475186	0.249582	0.260643	0.287995	0.226529	0.184808	0.233616	0.23216	0.299908	0.188098	0.196449	0.231008	0.252455	0.156173	0.125191	0.306457	0.362532	0.335436	0.225835	0.264271	0.157647	0.287858
TS6-H0	0.311479	0.326782	0.287118	0.272386	0.298561	0.26921	0.303319	0.381716	0.326828	0.344246	0.259787	0.296004	0.256528	0.341377	0.268676	0.301377	0.333199	0.328586	0.380594	0.29035	0.374557	0.317353	0.308603	0.349033	0.302781	0.279855	0.287241	0.429064	0.239854	0.300075	0.281696	0.271701	0.206603	0.244485	0.287001	0.326322	0.311964	0.266803	0.269778	0.287367	0.260351	0.285397	0.336488	0.311256	0.260258	0.253922	0.290948	0.251554	0.315022
TS7-H8	0.275682	0.286423	0.305069	0.250925	0.210326	0.233631	0.265019	0.291468	0.245515	0.30452	0.247457	0.375873	0.215484	0.226923	0.291042	0.311809	0.300964	0.261612	0.408108	0.290927	0.267723	0.339027	0.366138	0.275695	0.229245	0.245374	0.237663	0.489675	0.255629	0.2101	0.290351	0.309708	0.264223	0.263489	0.242885	0.324172	0.306774	0.325036	0.213882	0.307389	0.277592	0.287168	0.338309	0.39628	0.368763	0.265563	0.188795	0.308553	0.158996
CS3-H8	0.248308	0.292155	0.309621	0.240919	0.233612	0.24335	0.150056	0.221984	0.246062	0.242446	0.226563	0.319854	0.162775	0.267083	0.284633	0.249649	0.274127	0.21733	0.367947	0.248757	0.264649	0.290245	0.34128	0.237262	0.195516	0.279111	0.249573	0.449089	0.193695	0.240663	0.285644	0.26535	0.184007	0.210094	0.260579	0.268242	0.25882	0.253941	0.225486	0.309413	0.244106	0.228426	0.349959	0.359278	0.317583	0.222263	0.192696	0.281626	0.223608
CS9-D5	0.289087	0.204658	0.277693	0.243047	0.273926	0.268116	0.234673	0.272788	0.239652	0.267953	0.24265	0.358027	0.227531	0.232415	0.199581	0.312078	0.200251	0.25802	0.32261	0.24334	0.233213	0.24604	0.314642	0.193691	0.240836	0.27971	0.280115	0.478363	0.303014	0.237991	0.299765	0.248019	0.222367	0.259212	0.257092	0.283824	0.24802	0.230114	0.218077	0.241131	0.218391	0.176894	0.288448	0.422941	0.368111	0.294324	0.298012	0.218151	0.286804
TS4-H0	0.227597	0.240721	0.25309	0.206001	0.210848	0.171548	0.211191	0.224072	0.236615	0.263448	0.205217	0.329202	0.158136	0.203082	0.267555	0.267843	0.212946	0.234587	0.348933	0.219683	0.280268	0.288568	0.328299	0.226085	0.151717	0.249957	0.195762	0.422796	0.192257	0.212488	0.289421	0.243146	0.221968	0.216378	0.24	0.291002	0.236477	0.252024	0.17379	0.273992	0.200937	0.249019	0.323004	0.383031	0.302563	0.213509	0.206852	0.255977	0.197606
WC8-D5	0.232643	0.250743	0.243882	0.181923	0.217986	0.222342	0.199139	0.276264	0.224601	0.262703	0.237004	0.270531	0.144865	0.251345	0.214902	0.230295	0.255407	0.265993	0.397619	0.267447	0.223171	0.256725	0.274349	0.221839	0.206593	0.237033	0.24445	0.435904	0.220735	0.216274	0.250303	0.238627	0.185225	0.182572	0.213822	0.316431	0.236144	0.237772	0.190463	0.283716	0.183336	0.196921	0.311884	0.30718	0.316365	0.200621	0.163746	0.246978	0.184519
TS9-H0	0.258577	0.315066	0.339411	0.244567	0.283751	0.173037	0.286025	0.263896	0.260308	0.320534	0.278941	0.437769	0.262303	0.279695	0.303561	0.344117	0.278577	0.298665	0.374018	0.26347	0.291263	0.338153	0.369268	0.293874	0.238158	0.320004	0.182772	0.414864	0.285288	0.200214	0.290544	0.267631	0.287498	0.249455	0.27914	0.264656	0.325927	0.307071	0.237586	0.241846	0.292933	0.322566	0.294594	0.357896	0.297257	0.316167	0.241256	0.33097	0.256037
WC2-D3	0.546514	0.465578	0.460792	0.548566	0.518882	0.539439	0.507976	0.552754	0.509997	0.485589	0.532939	0.486005	0.536018	0.503899	0.521676	0.484579	0.513834	0.4687	0.568113	0.514065	0.491099	0.485543	0.507031	0.455401	0.512644	0.561608	0.519852	0.618521	0.524045	0.511593	0.491604	0.565774	0.535561	0.542174	0.543414	0.512583	0.503222	0.540233	0.528312	0.466084	0.53234	0.501231	0.533008	0.470568	0.489276	0.502305	0.507676	0.467671	0.509917
WC9-H8	0.299243	0.283791	0.325669	0.28005	0.312739	0.267224	0.273933	0.3004	0.269042	0.256997	0.298237	0.380839	0.254025	0.281894	0.208665	0.326852	0.269061	0.26272	0.30127	0.221057	0.265526	0.321538	0.331782	0.257434	0.262874	0.305779	0.239232	0.453975	0.263606	0.255659	0.291335	0.266871	0.263876	0.257034	0.291844	0.227792	0.238658	0.276372	0.292295	0.250897	0.261515	0.225231	0.267286	0.351443	0.315632	0.28689	0.289341	0.24488	0.310832
WT9-H8	0.25991	0.338564	0.339108	0.231949	0.268597	0.299194	0.231413	0.299804	0.205492	0.299171	0.273186	0.357147	0.265932	0.296664	0.26248	0.300815	0.351094	0.281475	0.441616	0.360737	0.275783	0.334959	0.313494	0.287474	0.277398	0.266541	0.313744	0.492883	0.248137	0.21614	0.284196	0.271782	0.208418	0.209464	0.238604	0.371374	0.308124	0.234213	0.282839	0.288135	0.217376	0.267925	0.313243	0.351497	0.376748	0.239982	0.243277	0.304592	0.245416
TS3-H8	0.302578	0.295717	0.337043	0.338371	0.290328	0.320216	0.291603	0.299393	0.248486	0.347911	0.290861	0.309139	0.282964	0.328854	0.355872	0.283594	0.351485	0.308668	0.387231	0.332925	0.355468	0.348688	0.318713	0.292586	0.266548	0.286426	0.308664	0.417124	0.320703	0.261388	0.299123	0.244164	0.269308	0.32599	0.211143	0.35014	0.267266	0.308264	0.260989	0.311913	0.252106	0.289008	0.429163	0.371474	0.340608	0.230537	0.268525	0.271793	0.30958
WT6-H0	0.297217	0.2799	0.271432	0.241373	0.285676	0.305426	0.267497	0.308884	0.268412	0.231517	0.270156	0.34661	0.242323	0.253611	0.183313	0.300332	0.237007	0.235423	0.404266	0.281477	0.237438	0.240005	0.303344	0.256088	0.293749	0.296173	0.311874	0.534886	0.277543	0.233275	0.31619	0.26145	0.215233	0.229927	0.278793	0.328795	0.235089	0.255128	0.264082	0.266489	0.243323	0.188853	0.284695	0.394685	0.399159	0.241717	0.268314	0.22043	0.270171
TS1-D5	0.270583	0.238085	0.234521	0.219802	0.244919	0.25792	0.220529	0.294337	0.249161	0.24789	0.207163	0.213095	0.22632	0.264338	0.259371	0.174412	0.286048	0.282505	0.382855	0.250677	0.310019	0.22579	0.175125	0.264551	0.22647	0.20818	0.295975	0.43305	0.208478	0.229177	0.218027	0.191806	0.155413	0.215136	0.246085	0.333207	0.227208	0.250581	0.208499	0.307146	0.170915	0.192851	0.382214	0.298867	0.26256	0.137793	0.272545	0.192348	0.262552
WC8-H8	0.254115	0.268556	0.300529	0.199647	0.235974	0.231359	0.231844	0.273553	0.225966	0.314331	0.247211	0.353296	0.171056	0.235259	0.214288	0.279962	0.234912	0.24425	0.389115	0.323195	0.221461	0.322525	0.3131	0.223285	0.2245	0.250704	0.241141	0.472863	0.253499	0.220566	0.263853	0.259302	0.200655	0.207103	0.249615	0.333151	0.298415	0.25824	0.226116	0.277665	0.222438	0.266894	0.272885	0.379748	0.386603	0.269342	0.218358	0.305009	0.211286
WC1-D3	0.177939	0.23325	0.269316	0.174023	0.178189	0.214754	0.178635	0.258075	0.235537	0.232078	0.218884	0.29657	0.115189	0.234641	0.236933	0.227591	0.245004	0.23695	0.382139	0.26769	0.229859	0.233308	0.276826	0.251794	0.184731	0.221598	0.200636	0.45351	0.181242	0.18302	0.258936	0.21984	0.151829	0.168022	0.193257	0.294874	0.225202	0.209977	0.186567	0.269235	0.172865	0.208714	0.312305	0.328178	0.309119	0.207373	0.172337	0.205524	0.162119
TS5-D3	0.166629	0.225555	0.341229	0.278966	0.214938	0.249867	0.231283	0.157263	0.262141	0.21466	0.247901	0.317289	0.177584	0.193215	0.310736	0.275234	0.24346	0.249937	0.356812	0.276204	0.291863	0.278706	0.353886	0.305981	0.202091	0.192213	0.231199	0.453481	0.21453	0.188584	0.314137	0.212657	0.197584	0.211657	0.171715	0.281273	0.187107	0.267448	0.242844	0.260081	0.252957	0.271753	0.345858	0.359604	0.318953	0.242634	0.201433	0.265451	0.221348
TS9-D5	0.237523	0.216575	0.254305	0.225925	0.243309	0.214242	0.20234	0.296274	0.250656	0.203973	0.240078	0.330581	0.176111	0.179544	0.196762	0.285919	0.223161	0.198372	0.330927	0.212137	0.232295	0.226119	0.333544	0.236534	0.222404	0.243841	0.241855	0.491023	0.212284	0.205492	0.300059	0.237315	0.188823	0.147362	0.212289	0.240484	0.199496	0.244953	0.21613	0.239662	0.225262	0.147667	0.271202	0.396216	0.331021	0.210961	0.156799	0.208066	0.220772
CS1-D5	0.190194	0.209529	0.250034	0.214431	0.19351	0.191325	0.176376	0.243825	0.257485	0.204126	0.170609	0.281952	0.13091	0.222571	0.218814	0.225855	0.218591	0.221928	0.342069	0.216422	0.259514	0.240485	0.264422	0.247405	0.131949	0.157871	0.228633	0.43382	0.180156	0.163101	0.257998	0.188898	0.14218	0.157583	0.172708	0.282679	0.174382	0.184562	0.159009	0.257409	0.177549	0.182618	0.355405	0.32516	0.240999	0.182591	0.153407	0.176299	0.190443
TS5-D5	0.275748	0.253153	0.262408	0.266796	0.264327	0.273144	0.252544	0.327759	0.312784	0.328957	0.247896	0.278388	0.222307	0.289344	0.31226	0.239983	0.266462	0.319373	0.404317	0.333923	0.313652	0.276707	0.274202	0.2672	0.248714	0.286185	0.272999	0.436199	0.285079	0.267581	0.303709	0.278006	0.271618	0.306282	0.264698	0.377566	0.306667	0.246066	0.232168	0.342479	0.242358	0.309707	0.379799	0.31625	0.320754	0.268681	0.281385	0.230774	0.277794
TS7-H0	0.230075	0.18934	0.197555	0.241202	0.26561	0.264017	0.251536	0.252097	0.320243	0.195038	0.221707	0.25459	0.204289	0.171043	0.225991	0.262557	0.174397	0.208126	0.35781	0.229518	0.269756	0.204011	0.290962	0.245998	0.244056	0.185153	0.292408	0.47814	0.209507	0.271979	0.311751	0.228874	0.208397	0.253531	0.252794	0.302264	0.165851	0.286557	0.249343	0.247736	0.225221	0.20842	0.340748	0.340145	0.310859	0.226464	0.28112	0.168156	0.272721
WC6-H8	0.253177	0.326888	0.267411	0.18051	0.22772	0.261718	0.256804	0.297299	0.251663	0.257657	0.250712	0.355887	0.233944	0.288238	0.23705	0.266337	0.297039	0.302698	0.455948	0.307938	0.208132	0.297198	0.317536	0.262027	0.268614	0.29051	0.263916	0.508314	0.2354	0.147418	0.206927	0.241403	0.233108	0.200758	0.270025	0.342131	0.266318	0.310377	0.274973	0.331166	0.280869	0.273332	0.289101	0.3796	0.384971	0.254085	0.193086	0.277098	0.211866
TS10-D5	0.257953	0.316135	0.394816	0.315216	0.274832	0.292604	0.290551	0.246493	0.250721	0.324003	0.318097	0.413325	0.246785	0.291797	0.326994	0.350901	0.305407	0.239359	0.400215	0.33155	0.340596	0.378982	0.419637	0.333761	0.233096	0.303518	0.235849	0.474701	0.277353	0.260799	0.361892	0.274037	0.252897	0.208269	0.217557	0.275259	0.274747	0.326218	0.259758	0.269283	0.2566	0.266757	0.379161	0.440048	0.38275	0.299228	0.225979	0.329082	0.27372
CS4-H0	0.257664	0.257608	0.371291	0.279406	0.275968	0.258911	0.287179	0.224263	0.286012	0.318731	0.300993	0.381632	0.226057	0.235488	0.30849	0.349083	0.286285	0.277404	0.38483	0.308298	0.31754	0.328798	0.397973	0.317686	0.253396	0.265694	0.274669	0.495507	0.297043	0.270761	0.348083	0.267344	0.217592	0.246209	0.225057	0.301448	0.275862	0.287479	0.246695	0.255783	0.255853	0.247542	0.340894	0.438769	0.407754	0.274513	0.230007	0.330684	0.2248
TS9-D7	0.254916	0.30825	0.349475	0.326591	0.280931	0.28819	0.220148	0.245569	0.311244	0.241642	0.256923	0.30977	0.229673	0.326021	0.340057	0.247805	0.274064	0.282609	0.38289	0.284797	0.371	0.312068	0.300297	0.328081	0.193325	0.267196	0.275401	0.428448	0.203713	0.230796	0.330006	0.27224	0.260533	0.260616	0.27448	0.321468	0.249974	0.256419	0.252548	0.31312	0.245163	0.261133	0.425769	0.360882	0.280206	0.235497	0.254289	0.247907	0.304985
WT2-D5	0.258631	0.311718	0.349646	0.24374	0.252809	0.253463	0.213578	0.215751	0.213614	0.268466	0.233988	0.370104	0.190583	0.283893	0.259682	0.310546	0.266592	0.253797	0.349115	0.288417	0.281452	0.332329	0.346049	0.260959	0.238923	0.272871	0.24039	0.442805	0.208437	0.210392	0.271641	0.250747	0.223473	0.205712	0.235117	0.28887	0.276643	0.270722	0.255694	0.303379	0.26522	0.261648	0.334232	0.402051	0.3579	0.251019	0.225245	0.301297	0.251627
TS8-D5	0.279098	0.345675	0.366427	0.310068	0.26487	0.293991	0.204021	0.309623	0.291734	0.275551	0.290952	0.378739	0.231521	0.328222	0.371145	0.330247	0.337763	0.291151	0.427146	0.365023	0.357356	0.356971	0.406888	0.344171	0.245149	0.322795	0.280308	0.521026	0.243563	0.2231	0.340923	0.327482	0.277962	0.245569	0.248793	0.361506	0.341671	0.314606	0.268328	0.325944	0.287695	0.327344	0.414327	0.437402	0.361012	0.258107	0.174839	0.331318	0.248269
WT2-H0	0.256352	0.29215	0.261406	0.251425	0.279972	0.317226	0.272717	0.344529	0.24966	0.28098	0.315344	0.379915	0.243625	0.25818	0.247583	0.322299	0.29134	0.248992	0.399671	0.277434	0.266709	0.296617	0.368763	0.27003	0.302012	0.294105	0.304567	0.530688	0.25296	0.265384	0.324558	0.310699	0.224502	0.200984	0.259877	0.301199	0.254018	0.276536	0.275078	0.196359	0.272181	0.204955	0.314829	0.416237	0.398039	0.283622	0.22987	0.260759	0.239094
WC1-H8	0.323723	0.360297	0.32667	0.314435	0.314181	0.381551	0.319995	0.342125	0.374618	0.263462	0.382221	0.45653	0.323404	0.318783	0.338234	0.347404	0.354153	0.299465	0.410256	0.365588	0.290584	0.324578	0.445513	0.335107	0.338399	0.337937	0.352873	0.517548	0.284807	0.336776	0.366213	0.337356	0.340622	0.306552	0.318204	0.323082	0.275701	0.373681	0.381164	0.333454	0.363382	0.333884	0.399183	0.397041	0.469993	0.360697	0.304464	0.315524	0.288787
WC3-D5	0.225587	0.280552	0.262302	0.217966	0.227881	0.25734	0.207105	0.265294	0.201525	0.268291	0.211088	0.310146	0.188018	0.261212	0.210956	0.225781	0.274262	0.245624	0.374248	0.309515	0.233444	0.280088	0.267207	0.250147	0.223165	0.20745	0.275203	0.442514	0.199181	0.166182	0.215728	0.202144	0.201019	0.207163	0.199274	0.336551	0.248897	0.238976	0.201737	0.279073	0.193846	0.253902	0.329922	0.315309	0.299922	0.207765	0.199125	0.226327	0.231149
WT1-H0	0.342069	0.319143	0.35732	0.304233	0.32513	0.304662	0.259059	0.267024	0.30708	0.296306	0.312685	0.42276	0.279474	0.277641	0.314377	0.367718	0.281759	0.264755	0.289392	0.278077	0.320833	0.334029	0.385045	0.24656	0.285512	0.346876	0.280541	0.451371	0.290172	0.269848	0.334933	0.28194	0.306283	0.333106	0.239627	0.205259	0.255679	0.307006	0.300981	0.231256	0.320239	0.295864	0.343973	0.446164	0.405749	0.295124	0.318782	0.292609	0.335216
WT3-D5	0.309793	0.331486	0.246261	0.274541	0.338204	0.359968	0.279218	0.354653	0.302203	0.321113	0.265954	0.2315	0.274256	0.354914	0.311696	0.220566	0.35286	0.329491	0.439608	0.336062	0.371487	0.299592	0.194789	0.323214	0.307094	0.270273	0.348155	0.524461	0.256369	0.262675	0.261625	0.268798	0.247991	0.275443	0.249507	0.382764	0.279959	0.326593	0.270381	0.33965	0.236053	0.262459	0.435709	0.336481	0.299769	0.17632	0.266447	0.233551	0.319405
WC7-H8	0.276075	0.257042	0.263124	0.270084	0.336184	0.345221	0.298676	0.303231	0.290203	0.231617	0.285948	0.310851	0.281629	0.251201	0.205481	0.312608	0.234099	0.273505	0.425666	0.292644	0.269606	0.25248	0.317351	0.253223	0.299433	0.287675	0.353836	0.472066	0.295721	0.270694	0.291095	0.258349	0.274173	0.250471	0.329162	0.340748	0.234218	0.278047	0.32002	0.306477	0.324193	0.233394	0.286416	0.375696	0.395083	0.307478	0.3172	0.245779	0.319271
CS6-D5	0.221979	0.253527	0.297376	0.197707	0.205904	0.221344	0.187542	0.20808	0.194725	0.194915	0.189756	0.318465	0.164477	0.213024	0.263948	0.257078	0.278937	0.226379	0.344928	0.211708	0.237467	0.265355	0.323032	0.256929	0.204127	0.233418	0.235453	0.431409	0.182965	0.188021	0.265087	0.232787	0.178735	0.180227	0.222184	0.254268	0.225777	0.236035	0.209572	0.256085	0.233081	0.215556	0.321765	0.342412	0.313428	0.205627	0.189926	0.265132	0.176086
WT11-D7	0.241426	0.259614	0.268892	0.227224	0.314811	0.313691	0.303131	0.311086	0.272794	0.245697	0.264222	0.336616	0.253955	0.234981	0.21168	0.325442	0.231795	0.267961	0.427432	0.301738	0.282606	0.251822	0.348701	0.252656	0.306549	0.282604	0.322204	0.523302	0.263393	0.233396	0.268865	0.254769	0.232576	0.20925	0.273344	0.347165	0.255421	0.297886	0.290206	0.230732	0.27317	0.212665	0.254087	0.42973	0.405567	0.269527	0.227085	0.265006	0.266344
WC2-D5	0.267893	0.262589	0.286569	0.247068	0.250405	0.276554	0.242263	0.316796	0.259197	0.270438	0.233961	0.254239	0.218832	0.301394	0.267872	0.276108	0.312388	0.32392	0.388971	0.289808	0.346929	0.290866	0.27046	0.276481	0.259074	0.255416	0.29661	0.479182	0.230154	0.20225	0.248848	0.259452	0.199356	0.217077	0.217649	0.346752	0.270523	0.246829	0.246024	0.31006	0.219755	0.248995	0.385627	0.343907	0.310547	0.162178	0.21746	0.221343	0.240359
WC9-D7	0.280524	0.290233	0.293637	0.253899	0.285951	0.333627	0.312105	0.300779	0.259797	0.293711	0.205558	0.29643	0.263598	0.335485	0.283259	0.283611	0.301383	0.341991	0.456252	0.318068	0.331815	0.306243	0.260095	0.284088	0.293837	0.30292	0.317975	0.513359	0.28246	0.205145	0.232431	0.241568	0.243917	0.252779	0.268149	0.375243	0.291954	0.318949	0.298903	0.321644	0.294563	0.260682	0.409502	0.362584	0.317082	0.218059	0.213594	0.253999	0.266524
WT10-D5	0.278027	0.261186	0.299256	0.288641	0.286839	0.292122	0.279866	0.299953	0.240683	0.248015	0.279693	0.377656	0.255261	0.257834	0.206607	0.345313	0.246452	0.285568	0.402453	0.269081	0.271512	0.313027	0.324158	0.211099	0.296516	0.299522	0.295174	0.504042	0.272247	0.192095	0.275245	0.274996	0.280614	0.264718	0.259461	0.308959	0.242684	0.308513	0.265262	0.272519	0.277986	0.231765	0.281119	0.425262	0.372623	0.274703	0.250921	0.247298	0.286228
TS7-D7	0.396938	0.318123	0.359808	0.432553	0.378108	0.316906	0.371549	0.39446	0.365992	0.323368	0.363631	0.381681	0.383483	0.374826	0.358617	0.344655	0.359337	0.280585	0.320067	0.291009	0.402949	0.358791	0.390073	0.360653	0.326134	0.38023	0.329924	0.413277	0.377926	0.379336	0.392087	0.401886	0.373466	0.381986	0.411636	0.304574	0.344748	0.411816	0.350866	0.306576	0.334118	0.332849	0.402013	0.343341	0.293209	0.34871	0.417445	0.326704	0.421855
WC10-D7	0.203788	0.257961	0.27583	0.20239	0.218961	0.183304	0.204152	0.253179	0.23839	0.24365	0.228362	0.338347	0.152401	0.202256	0.233913	0.26308	0.261204	0.249078	0.392659	0.248665	0.266353	0.28913	0.319132	0.2688	0.19699	0.224528	0.221511	0.465294	0.175301	0.181578	0.242481	0.23239	0.157351	0.14664	0.192236	0.279809	0.22471	0.220208	0.196357	0.225178	0.209043	0.228784	0.312554	0.360826	0.305286	0.204261	0.123461	0.246277	0.184725
WC3-H8	0.272683	0.273911	0.245229	0.236282	0.27821	0.29065	0.291073	0.309351	0.242514	0.220743	0.222514	0.362974	0.229408	0.236224	0.206923	0.325885	0.241196	0.260288	0.408255	0.246522	0.219997	0.252559	0.315931	0.253556	0.290198	0.313182	0.289114	0.534734	0.28331	0.159948	0.280946	0.261351	0.263233	0.253327	0.249339	0.301677	0.235355	0.297846	0.257739	0.282177	0.259252	0.206002	0.289002	0.422754	0.394276	0.271867	0.22801	0.212693	0.219963
TS7-D3	0.280664	0.32529	0.38619	0.323855	0.267804	0.270931	0.283943	0.208846	0.306771	0.286444	0.310812	0.434082	0.251204	0.27385	0.363793	0.359862	0.304598	0.257687	0.370935	0.336053	0.35686	0.377307	0.425899	0.330996	0.224477	0.29957	0.263445	0.462327	0.253504	0.267033	0.355488	0.286081	0.286512	0.265054	0.212357	0.279321	0.276191	0.316621	0.249646	0.268701	0.328126	0.33358	0.407538	0.429701	0.382712	0.307714	0.199027	0.352208	0.254897
TS10-D7	0.252395	0.272025	0.287571	0.311761	0.269983	0.301573	0.276679	0.313594	0.254411	0.245577	0.30652	0.372129	0.25992	0.258857	0.291994	0.293711	0.276098	0.246728	0.38064	0.28307	0.297896	0.303429	0.368942	0.26146	0.226772	0.302334	0.263831	0.459794	0.230337	0.245283	0.278627	0.286343	0.286232	0.262873	0.263355	0.301759	0.262016	0.311004	0.276591	0.205087	0.244852	0.24693	0.326079	0.409029	0.329518	0.26427	0.224827	0.244147	0.288915
WT10-H0	0.31332	0.339003	0.332879	0.304387	0.245156	0.350272	0.307101	0.385338	0.253012	0.351491	0.312341	0.331829	0.278054	0.346953	0.314179	0.271393	0.370922	0.319993	0.442339	0.371686	0.361811	0.330665	0.339391	0.340796	0.31758	0.286153	0.340812	0.495051	0.289364	0.289851	0.30041	0.328287	0.242727	0.271922	0.260602	0.399364	0.324434	0.265794	0.299455	0.326051	0.28083	0.294063	0.392589	0.340306	0.370304	0.258181	0.247254	0.320531	0.249186
WC10-D3	0.168959	0.238647	0.294895	0.218716	0.196453	0.204241	0.190912	0.247504	0.21256	0.237056	0.223209	0.332369	0.158645	0.228825	0.24952	0.27367	0.249903	0.256727	0.358694	0.243804	0.282768	0.28911	0.318659	0.254892	0.185234	0.210454	0.20803	0.445921	0.167949	0.187653	0.268004	0.205334	0.184396	0.15418	0.165556	0.284628	0.220852	0.220755	0.183176	0.232163	0.211135	0.22862	0.318724	0.37288	0.289283	0.191047	0.148993	0.231874	0.187366
CS7-D7	0.298338	0.262102	0.333835	0.246702	0.280269	0.278071	0.226073	0.27761	0.227758	0.321615	0.242833	0.310174	0.209016	0.258536	0.250989	0.283658	0.265722	0.245294	0.360521	0.33213	0.288134	0.302241	0.270845	0.233527	0.211722	0.253057	0.277524	0.479138	0.252812	0.201072	0.259679	0.242856	0.203734	0.238118	0.217754	0.347125	0.283368	0.249324	0.194	0.253957	0.18456	0.227096	0.322001	0.38241	0.323569	0.213886	0.239891	0.266846	0.287655
WT8-D5	0.281008	0.300231	0.287702	0.225622	0.261193	0.292366	0.311854	0.303324	0.268879	0.300762	0.218496	0.298559	0.226938	0.304428	0.270129	0.27257	0.286949	0.300241	0.433856	0.336026	0.275719	0.294561	0.287205	0.306451	0.268005	0.276423	0.292774	0.504741	0.274535	0.184375	0.253588	0.230891	0.227975	0.262378	0.237772	0.378308	0.273964	0.292723	0.280194	0.308118	0.263007	0.287004	0.363071	0.331625	0.339932	0.247922	0.207614	0.269235	0.255922
WT2-D7	0.24779	0.262765	0.292531	0.208732	0.242754	0.264648	0.194593	0.243354	0.18493	0.302688	0.178587	0.291965	0.168543	0.243318	0.202781	0.269254	0.243273	0.234309	0.391791	0.273351	0.273199	0.299685	0.258728	0.217438	0.239682	0.214978	0.27179	0.439376	0.214385	0.20481	0.218259	0.179144	0.155319	0.189008	0.235805	0.32058	0.261984	0.220819	0.184533	0.227818	0.173471	0.222859	0.29881	0.380598	0.286138	0.202328	0.230471	0.235341	0.253154
WT3-H0	0.212176	0.329223	0.339787	0.235661	0.27003	0.337593	0.308223	0.293996	0.226224	0.329828	0.283222	0.398851	0.285664	0.285749	0.308458	0.384423	0.310553	0.326411	0.467404	0.353055	0.298364	0.357097	0.388797	0.335701	0.311869	0.280029	0.321073	0.531145	0.297348	0.241185	0.296	0.334357	0.299963	0.243789	0.303233	0.383408	0.342724	0.306117	0.315951	0.310423	0.345046	0.331763	0.282163	0.435739	0.396607	0.336368	0.245507	0.362903	0.24807
WC3-D3	0.209395	0.254091	0.223288	0.184728	0.240202	0.241883	0.197211	0.2741	0.237458	0.26218	0.20539	0.282471	0.150364	0.262546	0.234131	0.205848	0.259974	0.263228	0.346314	0.269187	0.288811	0.236228	0.265416	0.240533	0.215073	0.203201	0.236528	0.475563	0.165016	0.182931	0.229889	0.195591	0.165994	0.172483	0.165792	0.297962	0.208933	0.2303	0.204502	0.250897	0.187993	0.227729	0.326298	0.345883	0.300431	0.205811	0.166728	0.209207	0.218006
WC5-D5	0.206903	0.278337	0.300817	0.202071	0.22884	0.257329	0.210104	0.259158	0.191084	0.276509	0.235124	0.364556	0.169838	0.26205	0.232913	0.27707	0.246604	0.281399	0.386782	0.295389	0.239182	0.294858	0.315417	0.240308	0.221853	0.246971	0.238969	0.446382	0.229734	0.165785	0.218981	0.210829	0.21631	0.191453	0.200064	0.311154	0.25241	0.23648	0.234284	0.231128	0.251151	0.262727	0.300503	0.381697	0.342349	0.268044	0.211472	0.236291	0.221158
WT8-D3	0.215548	0.270542	0.33366	0.263212	0.21841	0.266193	0.238526	0.270557	0.240661	0.329328	0.277314	0.383564	0.227089	0.227357	0.311538	0.287635	0.298771	0.254685	0.408341	0.320847	0.307484	0.341146	0.370483	0.278923	0.210006	0.294423	0.231771	0.469643	0.210679	0.216083	0.255789	0.291159	0.221763	0.212315	0.226219	0.306295	0.296383	0.288521	0.213242	0.212029	0.289899	0.283191	0.350564	0.395533	0.342917	0.243848	0.192666	0.288601	0.194945
WC12-D7	0.255199	0.296159	0.249944	0.202449	0.220269	0.282289	0.229999	0.304525	0.225599	0.276197	0.242585	0.32223	0.234164	0.275077	0.283172	0.22169	0.348456	0.295456	0.41422	0.323095	0.282524	0.295808	0.321773	0.281696	0.260964	0.270638	0.278164	0.481329	0.227546	0.214017	0.219522	0.270154	0.218429	0.217339	0.229403	0.379824	0.25989	0.273985	0.259465	0.304308	0.256897	0.25318	0.332212	0.307027	0.342244	0.227237	0.197942	0.281094	0.206753
WC8-D7	0.226717	0.266815	0.285811	0.20344	0.223097	0.241297	0.221318	0.208452	0.198932	0.250582	0.171754	0.302216	0.193664	0.264021	0.234756	0.267109	0.224015	0.274777	0.380834	0.241366	0.288525	0.297196	0.272364	0.212342	0.216679	0.238578	0.248171	0.452343	0.187023	0.184556	0.23061	0.15989	0.188435	0.174424	0.215796	0.326004	0.23181	0.264862	0.228328	0.264443	0.233051	0.222374	0.342703	0.375796	0.315825	0.176326	0.20194	0.221654	0.224333
WC7-D5	0.275906	0.313529	0.280624	0.199444	0.246279	0.266889	0.240856	0.265223	0.261889	0.282358	0.235429	0.306319	0.211212	0.287131	0.219711	0.273686	0.262706	0.30804	0.363542	0.299875	0.279088	0.305062	0.292477	0.287586	0.25149	0.239687	0.314635	0.447552	0.258601	0.175027	0.271681	0.166918	0.243124	0.234116	0.185364	0.30257	0.225881	0.283248	0.245632	0.31891	0.218879	0.254194	0.364276	0.387906	0.353525	0.207094	0.2151	0.258351	0.24029
WT7-D7	0.271522	0.304014	0.317467	0.217924	0.247231	0.292098	0.2271	0.316974	0.225972	0.29456	0.232247	0.289927	0.196601	0.307999	0.256976	0.279191	0.299385	0.299091	0.440394	0.347608	0.275	0.278452	0.302381	0.254333	0.274016	0.292493	0.285693	0.501464	0.268417	0.187255	0.236557	0.255314	0.229979	0.248656	0.262038	0.372841	0.32319	0.247661	0.234394	0.336779	0.22287	0.252342	0.339105	0.373784	0.369575	0.212214	0.188127	0.278623	0.209138
TS1-D3	0.276943	0.290154	0.355024	0.335952	0.317311	0.330887	0.277802	0.282798	0.304543	0.232541	0.338853	0.41604	0.283676	0.261951	0.31741	0.376701	0.27154	0.23642	0.386214	0.321867	0.334903	0.305563	0.439629	0.332238	0.317218	0.273549	0.332601	0.561588	0.254088	0.296066	0.393676	0.35653	0.27839	0.257272	0.296223	0.308949	0.288944	0.358452	0.314744	0.26219	0.326297	0.28458	0.323747	0.475904	0.428044	0.324886	0.239688	0.318802	0.285473
WT10-D7	0.390749	0.325475	0.333978	0.370211	0.338003	0.41295	0.353265	0.445848	0.326932	0.340977	0.394132	0.414455	0.338592	0.330236	0.353472	0.378894	0.363148	0.37764	0.441212	0.362638	0.328212	0.361045	0.405172	0.277568	0.388557	0.356254	0.387458	0.528208	0.371049	0.350111	0.366779	0.376316	0.350825	0.372228	0.345367	0.393526	0.34973	0.342252	0.371286	0.358021	0.351928	0.331645	0.38011	0.440047	0.458112	0.361981	0.332242	0.287239	0.320841
TS6-D5	0.237541	0.354783	0.405876	0.307562	0.265179	0.301454	0.245913	0.287741	0.257213	0.296377	0.312663	0.423446	0.252406	0.316718	0.34227	0.370911	0.351659	0.258013	0.431002	0.363307	0.353186	0.38025	0.455949	0.364384	0.286284	0.280953	0.293758	0.511457	0.233583	0.262724	0.351107	0.337332	0.246053	0.193686	0.275951	0.327693	0.345576	0.29599	0.285376	0.25826	0.304173	0.325557	0.392173	0.449515	0.37972	0.290745	0.183972	0.369	0.2539
WC6-D5	0.26605	0.263218	0.282495	0.215047	0.228443	0.260262	0.267757	0.303922	0.177197	0.311358	0.199193	0.321883	0.240081	0.283622	0.261419	0.2819	0.294656	0.327007	0.424759	0.298909	0.296656	0.324539	0.291475	0.228588	0.268973	0.246773	0.299497	0.438875	0.27526	0.204821	0.206236	0.225525	0.23298	0.259295	0.255364	0.358683	0.303006	0.267339	0.270905	0.316061	0.248737	0.286074	0.33896	0.348789	0.335196	0.233881	0.221585	0.280763	0.222245
TS2-D3	0.265005	0.347369	0.399712	0.308693	0.262749	0.278416	0.278223	0.278632	0.288171	0.308692	0.335207	0.462757	0.290166	0.278504	0.387872	0.371128	0.333	0.285705	0.450266	0.350945	0.343705	0.391726	0.442032	0.336768	0.240429	0.294653	0.238723	0.490428	0.272222	0.26676	0.354053	0.353643	0.311032	0.271251	0.290961	0.311462	0.360216	0.34938	0.281437	0.294496	0.339101	0.348062	0.408045	0.437858	0.415947	0.324852	0.215955	0.378043	0.251522
WC6-D7	0.245471	0.308501	0.313727	0.215386	0.264739	0.238857	0.216861	0.220886	0.236533	0.216558	0.235563	0.35412	0.190835	0.278135	0.221536	0.288763	0.233437	0.219243	0.365267	0.279193	0.272571	0.316543	0.309073	0.286741	0.19383	0.243914	0.260046	0.469505	0.197105	0.146038	0.259381	0.226475	0.190522	0.185306	0.220566	0.286136	0.238793	0.271775	0.234211	0.273459	0.20255	0.234262	0.323579	0.389116	0.342787	0.207559	0.179968	0.260121	0.240338
WT6-D3	0.324621	0.305665	0.370115	0.331154	0.288457	0.252732	0.323122	0.374292	0.279512	0.380697	0.341081	0.409343	0.284864	0.314327	0.366268	0.348216	0.348287	0.358652	0.400716	0.30567	0.373266	0.385738	0.411869	0.318556	0.301366	0.33461	0.224414	0.462565	0.359295	0.290432	0.339506	0.323738	0.287373	0.294834	0.275587	0.309145	0.379643	0.333967	0.311586	0.295706	0.30188	0.336128	0.35333	0.366911	0.329471	0.306821	0.239048	0.345046	0.305545
TS8-D7	0.229958	0.307405	0.256308	0.191521	0.219494	0.270378	0.223283	0.296012	0.230857	0.244234	0.253384	0.344601	0.220078	0.215674	0.271207	0.262334	0.324229	0.270273	0.439946	0.28093	0.255252	0.299803	0.338036	0.290285	0.247142	0.263716	0.2592	0.494252	0.181045	0.186226	0.238889	0.239513	0.207632	0.160888	0.251396	0.307108	0.262173	0.279505	0.263662	0.26826	0.261133	0.238685	0.319362	0.376817	0.358276	0.233508	0.175716	0.253534	0.144784
TS10-D3	0.265382	0.29878	0.324216	0.256977	0.252463	0.23446	0.243492	0.277054	0.28762	0.297976	0.271565	0.372032	0.17417	0.214167	0.289906	0.335758	0.271048	0.244445	0.403002	0.324399	0.277507	0.320666	0.378145	0.275628	0.222717	0.232865	0.259964	0.4992	0.246304	0.226072	0.333945	0.300277	0.227287	0.238729	0.221419	0.315552	0.316584	0.282949	0.176324	0.289173	0.275317	0.277878	0.342556	0.401667	0.378716	0.270162	0.129476	0.318628	0.181939
WT1-D7	0.326004	0.335934	0.345356	0.312407	0.270313	0.347249	0.31252	0.348172	0.275005	0.344575	0.287048	0.334338	0.301939	0.356299	0.345959	0.300693	0.330527	0.350068	0.474322	0.383209	0.362074	0.352022	0.31766	0.333725	0.323316	0.302977	0.363363	0.46042	0.308665	0.23798	0.305601	0.301313	0.316025	0.311695	0.289769	0.426754	0.351367	0.308771	0.315494	0.349366	0.291181	0.343715	0.409312	0.375081	0.328004	0.26663	0.257889	0.327243	0.29031
WT7-D3	0.294601	0.344817	0.35426	0.223042	0.275011	0.281805	0.285092	0.304313	0.278399	0.360016	0.290759	0.423319	0.228143	0.23808	0.290747	0.358317	0.307402	0.316392	0.48236	0.377923	0.200459	0.360657	0.378727	0.261322	0.291501	0.312959	0.274341	0.518031	0.280683	0.22459	0.260479	0.321118	0.277548	0.259017	0.278242	0.356868	0.364554	0.316753	0.251182	0.301767	0.336212	0.324916	0.29267	0.436916	0.436316	0.333883	0.217361	0.352515	0.173183
WT9-D3	0.241144	0.268904	0.306727	0.208147	0.216876	0.245954	0.238556	0.275775	0.137208	0.281015	0.221096	0.354118	0.202003	0.262963	0.224305	0.286674	0.29004	0.284126	0.406433	0.310984	0.24843	0.282984	0.310572	0.248116	0.258788	0.24139	0.258572	0.492644	0.240067	0.196658	0.253592	0.232512	0.175291	0.194084	0.204784	0.356889	0.284215	0.215412	0.249226	0.286761	0.224014	0.245809	0.241289	0.356159	0.353393	0.251912	0.188854	0.267851	0.225607
TS10-H0	0.26713	0.234365	0.307249	0.319224	0.251929	0.346429	0.279452	0.297457	0.308923	0.240464	0.300801	0.409525	0.309226	0.215328	0.317307	0.361054	0.297697	0.288547	0.397999	0.291524	0.304289	0.285629	0.443872	0.307225	0.335757	0.280727	0.359047	0.554935	0.299311	0.278613	0.351475	0.364519	0.289289	0.295786	0.309226	0.33439	0.303503	0.347177	0.3463	0.29895	0.359033	0.29783	0.33138	0.449404	0.421392	0.334013	0.265682	0.308735	0.250039
TS5-H0	0.289328	0.3168	0.36627	0.304856	0.275759	0.303333	0.294919	0.293648	0.282488	0.309962	0.301064	0.375147	0.249378	0.318884	0.350199	0.313748	0.344991	0.328819	0.397028	0.323313	0.369663	0.323465	0.350658	0.349953	0.262664	0.326399	0.295435	0.506484	0.280628	0.216885	0.3097	0.252298	0.239019	0.243018	0.184948	0.340355	0.241632	0.289663	0.291581	0.333241	0.269524	0.256939	0.41413	0.406335	0.37671	0.233765	0.195468	0.298032	0.243536
WC1-D5	0.230867	0.286255	0.278613	0.182395	0.257182	0.233305	0.26607	0.27654	0.235987	0.276628	0.176311	0.327799	0.186405	0.248981	0.265471	0.270407	0.258774	0.292613	0.431952	0.275472	0.251417	0.291412	0.30314	0.230261	0.255265	0.267879	0.22527	0.486196	0.247285	0.150798	0.209277	0.205231	0.210731	0.217372	0.247106	0.354043	0.271352	0.289898	0.220823	0.275348	0.23025	0.270016	0.308541	0.370198	0.347727	0.213849	0.199592	0.265675	0.189004
WT9-D5	0.26021	0.333099	0.299383	0.188741	0.226343	0.262145	0.266787	0.28555	0.205822	0.288414	0.235536	0.376737	0.189351	0.254043	0.271379	0.329732	0.283146	0.317733	0.461472	0.306778	0.224853	0.31834	0.353854	0.259003	0.265797	0.286355	0.244663	0.514403	0.278806	0.178269	0.27024	0.23989	0.265987	0.240392	0.231881	0.363896	0.296745	0.298967	0.257355	0.302992	0.285187	0.277005	0.289177	0.414615	0.41548	0.28711	0.167862	0.292377	0.159756
WT1-D5	0.225548	0.282945	0.318579	0.242686	0.241902	0.257963	0.25743	0.29451	0.228304	0.292336	0.247644	0.354771	0.181552	0.254354	0.240972	0.307708	0.300166	0.264841	0.421645	0.286033	0.296237	0.321686	0.367924	0.284082	0.228639	0.241288	0.256991	0.486273	0.236247	0.184604	0.276396	0.249876	0.181834	0.17911	0.184694	0.315585	0.262678	0.239424	0.234144	0.224233	0.233265	0.233594	0.324111	0.406877	0.336879	0.230951	0.141974	0.267418	0.191141
WT4-D5	0.347233	0.284246	0.329864	0.36851	0.316792	0.359688	0.335673	0.351518	0.296536	0.359612	0.311303	0.311406	0.293609	0.351646	0.37474	0.282938	0.34523	0.353198	0.458014	0.384493	0.388639	0.35467	0.273657	0.316806	0.283569	0.331363	0.325783	0.49877	0.338714	0.276896	0.31816	0.345561	0.312753	0.33713	0.268506	0.408577	0.350229	0.327207	0.269625	0.338178	0.288378	0.321408	0.453041	0.318399	0.327099	0.284373	0.244927	0.289969	0.305976
WT6-D5	0.303109	0.38511	0.42822	0.361191	0.330757	0.381974	0.338384	0.344108	0.283434	0.391925	0.376305	0.471197	0.30809	0.39623	0.397956	0.408854	0.404542	0.389125	0.361794	0.385578	0.414492	0.440368	0.467087	0.407688	0.335424	0.37974	0.345385	0.428723	0.332324	0.295044	0.38487	0.311752	0.335591	0.299603	0.252778	0.376663	0.325603	0.353114	0.333632	0.34257	0.344945	0.355978	0.450279	0.494838	0.44499	0.338352	0.256988	0.36396	0.317565
TS2-H8	0.365489	0.347495	0.373988	0.392235	0.368612	0.287948	0.340455	0.361678	0.307595	0.373372	0.34178	0.381208	0.349215	0.387117	0.38704	0.36778	0.371458	0.333286	0.423339	0.309724	0.422954	0.411823	0.397031	0.369411	0.311234	0.3742	0.255775	0.455737	0.383447	0.290196	0.363478	0.382663	0.33778	0.299615	0.326877	0.30956	0.379841	0.363187	0.338772	0.280836	0.305414	0.325489	0.397297	0.365601	0.282534	0.3119	0.280043	0.351968	0.348477
TS8-D3	0.417054	0.289785	0.35551	0.433223	0.399739	0.335875	0.373201	0.38903	0.369437	0.359102	0.352414	0.354907	0.367109	0.365712	0.383086	0.375849	0.350201	0.340311	0.362533	0.277803	0.410455	0.376086	0.361766	0.328038	0.350591	0.377956	0.347477	0.481936	0.40434	0.362954	0.393211	0.390101	0.361674	0.395489	0.367159	0.310812	0.365666	0.398453	0.346476	0.30051	0.345638	0.311039	0.41242	0.35332	0.294002	0.310233	0.32043	0.308061	0.394698
WT6-D7	0.323316	0.321689	0.334533	0.282045	0.261832	0.301576	0.294673	0.350109	0.245613	0.377668	0.296961	0.396766	0.271071	0.286563	0.326046	0.346501	0.370377	0.294895	0.462479	0.353432	0.314946	0.363964	0.421444	0.331981	0.310084	0.323638	0.337665	0.540843	0.332888	0.291662	0.352979	0.359202	0.250173	0.278526	0.320507	0.391914	0.393925	0.338816	0.262675	0.330054	0.294564	0.313116	0.377092	0.455219	0.418263	0.291045	0.232815	0.38058	0.222194
TS9-H8	0.284642	0.334514	0.33943	0.308147	0.263154	0.317663	0.265005	0.336054	0.262442	0.317473	0.27943	0.378195	0.30171	0.339027	0.358657	0.300232	0.385443	0.346069	0.441578	0.343553	0.385361	0.370934	0.381397	0.334363	0.303339	0.302993	0.329469	0.493618	0.262961	0.255657	0.2945	0.311023	0.28136	0.255096	0.291349	0.37932	0.323453	0.336378	0.340502	0.335426	0.323378	0.336303	0.418896	0.412574	0.366062	0.274129	0.246019	0.324623	0.264523
WT1-D3	0.337118	0.337482	0.324739	0.307344	0.276462	0.338181	0.301556	0.400852	0.284841	0.367701	0.33546	0.369925	0.268102	0.325417	0.317442	0.341597	0.376143	0.35606	0.495678	0.407399	0.295964	0.351106	0.397185	0.324906	0.334903	0.320173	0.331331	0.560618	0.344099	0.295717	0.332686	0.366827	0.283356	0.29303	0.264806	0.443664	0.373278	0.276294	0.294884	0.362772	0.320118	0.306311	0.341252	0.380082	0.435016	0.328506	0.239922	0.32669	0.247309
WT7-H8	0.361924	0.428913	0.437094	0.362711	0.345629	0.402143	0.368756	0.405335	0.340397	0.414107	0.419742	0.492687	0.358583	0.379301	0.438912	0.429387	0.4381	0.387093	0.476924	0.455626	0.358116	0.433991	0.479297	0.404779	0.369077	0.369189	0.348779	0.558857	0.382078	0.334902	0.40792	0.418709	0.365202	0.364264	0.312032	0.42849	0.41401	0.398257	0.332293	0.396896	0.398902	0.409499	0.440205	0.48477	0.523454	0.389206	0.317927	0.400236	0.322406
[truncated: 128 more columns]

## Sheet: Exposed unweighted unifrac PC
Eigvals	177
0.91969	0.771322	0.755893	0.660268	0.488361	0.388814	0.373653	0.351558	0.306191	0.286333	0.23991	0.210814	0.203684	0.190927	0.162783	0.156613	0.14389	0.136456	0.130914	0.121351	0.118884	0.11537	0.107279	0.101569	0.100465	0.0933143	0.0899504	0.0880617	0.0805358	0.0776629	0.0737928	0.0696075	0.0686117	0.0655068	0.0621595	0.058726	0.0584257	0.0568307	0.0538731	0.0508509	0.0478982	0.0460975	0.0432268	0.0417604	0.0390467	0.037804	0.0339121	0.0327906	0.0287139	0.0282478
Proportion explained	177
0.0989524	0.082989	0.081329	0.0710404	0.0525443	0.0418338	0.0402025	0.0378253	0.0329441	0.0308075	0.0258127	0.0226822	0.0219151	0.0205425	0.0175143	0.0168505	0.0154816	0.0146818	0.0140855	0.0130566	0.0127911	0.012413	0.0115425	0.0109281	0.0108093	0.01004	0.00967805	0.00947485	0.00866511	0.008356	0.00793961	0.0074893	0.00738215	0.00704809	0.00668794	0.00631852	0.00628621	0.00611459	0.00579638	0.00547121	0.00515352	0.00495978	0.00465091	0.00449314	0.00420116	0.00406746	0.00364872	0.00352805	0.00308942	0.00303927
Species	0	0
Site	177	177
CS1-D7	-0.0197644	0.063224	-0.00878685	0.0211545	-9.94963e-05	0.043136	-0.0273755	0.0530959	-0.0185904	-0.0745668	0.0290141	-0.0557439	0.00519402	-0.0141804	0.0171912	-0.00081831	0.00917696	-0.049191	0.0255515	-0.0191057	0.00826231	0.0409089	-0.0383836	0.00837084	0.00614316	0.0156544	-0.0107107	0.0065561	-0.00178473	0.0266295	-0.0220934	0.0129338	-0.0360112	0.0118951	-0.0174767	0.0500666	-0.00587303	0.0271354	-0.0150655	0.0016808	-0.0155636	0.0154501	-0.0183021	0.00170018	-0.0147885	0.00342426	-0.0208187	0.00518458	0.000133169
CS1-H0	0.0946625	-0.0428219	-0.0681755	-0.0406686	0.00529059	0.0103553	0.0756877	0.0565736	0.00457913	-0.0725207	0.0215728	-0.00235395	-0.0293184	0.0395657	0.022899	0.00897223	-0.0272533	0.025501	0.0152211	0.028913	-0.0122872	-0.00808576	-0.0484154	0.00598422	-0.051563	-0.00416592	0.00459336	0.022459	-0.0153462	0.0326003	0.0076659	-0.0161453	0.00119576	0.0245486	0.0237007	0.00437771	0.00499788	-0.017818	-0.00731764	0.016671	-0.012626	-0.00139526	-0.0189652	-0.0173521	-0.0370014	0.00177885	-0.000734305	-0.0100611	0.000134491
CS10-D3	0.117308	-0.0561442	0.0354443	-0.116351	0.031379	0.0423777	-0.00358068	-0.0109755	-0.0466491	-0.0498091	-0.0289976	0.058019	-0.0197271	-0.0413701	-0.0252806	0.0203328	0.0354983	-0.00460238	0.0112381	0.0124276	0.00799677	-0.00364416	-0.0347821	-0.0233637	0.0560551	-0.0470909	-0.0259235	0.0234537	0.0395948	-0.00411707	0.0109799	0.00559133	0.015006	-0.014627	0.0172702	-0.0107709	-0.00208956	-0.0110353	-0.00343654	0.00582611	-0.0346829	-0.00105804	0.000214233	-0.0079469	0.00592179	0.0178719	-0.000972536	-0.0268665	-0.0158936
CS10-H0	-0.0015639	0.0801121	0.0661358	-0.0728161	0.0343206	-0.0046361	-0.0388048	-0.0144362	-0.0118319	-0.00648462	-0.00670447	0.0577131	0.00696759	-0.0192786	-0.0323761	0.0406158	0.0142481	0.0226886	0.00969519	-0.0283647	0.0265845	0.0265732	-0.0248642	0.00801236	0.0404555	-0.0163064	-0.035897	-0.00324572	0.0338309	-0.017204	-0.0145039	0.00548572	-0.00800762	0.0210388	0.0105685	-0.00493538	0.00783667	0.0107927	0.00971566	-0.0299688	0.0162371	0.00880681	0.0374576	-0.00693544	0.0141054	0.00210381	0.0111797	0.0143558	-0.0193994
CS10-H8	-0.0390912	0.0304068	0.0181706	0.0148028	0.0596035	0.0589826	-0.0104825	-0.00846708	-0.0255336	-0.0429767	0.0213548	0.0331276	-0.0309931	0.0494564	0.00295336	0.0495095	-0.00500887	-0.0155943	0.0678626	-0.00618883	-0.0127305	-0.0264323	0.0301044	0.0201324	0.0258159	0.00601731	-0.0107816	0.0352868	0.00752144	0.0281927	-0.0206835	-0.0391585	0.0561065	-0.00221717	-0.00591802	-0.0210377	-0.0158641	-0.00346992	0.0201746	0.0018184	0.00507039	-0.0346969	-0.00521446	-0.00308866	-0.00374209	-0.00680975	-0.0101295	0.013461	0.00981104
CS2-D5	0.0200301	0.0417856	-0.0756875	0.0587587	0.0952764	-0.043638	-0.017495	0.0456465	-0.0483999	0.0215684	-0.0549173	0.0477316	-0.0102754	0.0455214	-0.00368671	0.021059	-0.024151	-0.01134	0.00196279	-0.00889002	0.0213156	0.00287918	0.00192779	0.00709576	-0.0133262	-0.00831096	0.0199894	-0.00665854	-0.0156636	-0.0503677	-0.0106235	-0.0191527	-0.0159908	-0.0379344	0.0144356	0.0136585	0.0176146	0.0137362	-0.00412715	0.00908101	-0.0382934	-0.0216955	0.00281854	0.00643986	0.00299429	-0.0153698	0.00586153	-0.00163729	-0.0044055
CS2-D7	0.0172916	0.0519839	-0.00187159	0.0403936	0.00476305	0.0650268	0.00376838	-0.0151705	0.012099	0.0818469	0.0328842	0.00214006	-0.0477136	0.0112596	0.0226385	0.0138504	0.0172932	0.0306788	-0.0322327	0.00333987	-0.0156944	0.00306634	-0.00964612	-0.0126563	0.0454422	0.00317904	-0.000303882	0.0147216	0.0102267	0.0180724	-0.0104888	-0.039089	-0.0365059	-0.0106539	-0.0285353	-0.0195684	0.0133204	0.0191456	0.0190868	-0.00193806	0.0100188	0.00479008	-0.021775	-0.0145218	0.00917701	-0.0133469	-0.00104513	-0.0290048	-0.0221119
CS3-D5	0.0123177	0.084413	-0.0718491	0.0772632	-0.0341429	0.00377191	0.00458894	0.0592592	0.13442	-0.0344019	0.0495028	0.0390014	0.0575721	0.0189748	-0.00813409	-0.0346929	0.00417073	0.0205116	-0.00643494	0.00226963	-0.00446108	0.0262898	-0.0113476	-0.00914622	0.00396778	0.0193677	-0.0144157	-0.0147889	-0.00232546	-0.00955687	0.0164343	-0.011567	-0.00832556	-0.000563334	0.0105126	0.0103475	0.021749	-0.0128669	-0.0227208	-0.019341	0.0148335	-0.0182512	-0.0107266	0.0122178	-0.0174954	-0.0071939	0.00585059	0.00433368	0.0226239
CS3-D7	-0.0451541	-0.00875037	0.041809	-0.0141405	0.00367197	-0.0656126	-0.029721	-0.0198174	0.0124603	-0.0154418	0.084724	0.0185564	-0.0258207	-0.0362634	0.0757982	-0.00885522	-0.00909187	-0.00330801	0.0499759	-0.0127398	-0.0190551	-0.00379	0.0136015	0.00836202	-0.00163339	0.0487949	-0.00997769	-0.0103021	0.0492054	-0.0105026	0.00834117	0.0111224	0.0143277	-0.0125749	0.0429785	0.0103959	-0.0211995	-0.018219	0.0249461	-0.0121789	0.00561191	0.0141928	-0.00867942	-0.0138198	-0.0313878	-0.00893278	0.0309345	-0.0196431	0.00264097
CS3-H0	0.0677729	0.0179642	-0.0749959	-0.0419282	-0.0748664	0.100744	-0.0337267	0.034436	0.0157252	0.0110677	-0.0244459	0.0225765	-0.00468633	0.0275214	0.0074568	-0.025506	0.00429653	-0.051294	-0.00418016	-0.033356	0.0219037	0.00216809	0.0110052	-0.00960901	-0.0468909	-0.0115314	0.028303	-0.0102163	0.00394183	0.0133309	0.0388679	-2.13711e-05	-0.0296537	0.00666002	-0.00253145	-0.00959968	0.0165288	-0.00826086	0.0016012	-0.0180511	0.0206028	0.0101194	-0.0220814	0.000784471	0.000402411	0.0214286	-0.00132552	-0.00405606	0.00298086
CS4-D5	0.0536007	0.02936	0.0648873	-0.0118072	0.0219174	-0.0239301	-0.0103281	0.0664961	0.0467918	-0.0157532	-0.00552532	0.0649259	-0.0284329	0.0037638	-0.0100432	0.0023632	0.0247683	0.0417284	0.046759	0.0239274	-0.0142586	-0.00358833	-0.00144618	0.017297	0.0430095	0.0154591	0.00530648	-0.00290995	-0.0132131	0.00306151	-0.00927918	0.0407329	-0.0049596	-0.0707723	0.0235961	-0.00180312	0.0197664	0.0128006	-0.0134083	0.00512858	-0.00924721	-0.000919332	-0.0232403	-0.00624356	-0.00700943	0.000151426	-0.0124924	0.00494583	-0.00156493
CS4-H8	0.164636	-0.0622261	0.161202	-0.00960262	0.00402825	0.0589019	0.0362674	0.0756386	-0.0035136	-0.0104338	0.024652	0.0107544	-0.00454368	0.0498355	0.000730051	-0.0644897	-0.0312464	0.0161083	-0.0694185	-0.00492182	0.0220429	0.0453452	0.02106	0.0249402	0.00828073	-0.00104468	0.0178157	-0.0250076	-0.00468726	0.033223	0.0243647	-0.00907849	-0.00269019	-0.0055817	-0.00818933	-0.026279	-0.0122472	0.000805361	0.00678108	0.00217563	0.00885769	0.00672634	-0.00191621	-0.0112606	0.00644622	0.00580844	-0.0221065	-0.00734063	-0.00188135
CS5-D5	0.00819915	0.0754443	0.00358867	0.00784905	0.0309609	0.0156481	0.0420524	0.0113001	-0.0189712	0.0354506	-0.0339849	-0.00168041	-0.00968147	0.0167136	-0.012581	-0.0232795	-0.0052572	0.0103499	-0.00430709	0.043217	-0.0378298	0.0107629	-0.000395804	0.0113928	0.0307565	0.0172948	0.00455695	-0.0104043	-0.00970407	0.0150187	-0.0031783	0.0138909	-0.0150778	-0.0127647	0.00179273	-0.0122108	0.00643368	-0.00426738	0.0125369	-0.0278795	-0.0285849	0.0106675	0.00196955	0.0115262	-0.0177776	-0.00548123	-0.00413254	-0.00126708	-0.0110473
CS5-H0	0.00979055	0.042159	-0.109995	-0.0815485	0.0357793	0.0324269	0.0528892	0.0599493	-0.00286732	-0.0595248	0.00918723	0.0160418	-0.00634796	0.0256517	-0.0123425	0.0389417	0.00283964	0.0149721	-0.0348014	-0.00546156	0.0297594	-0.0272664	0.0323936	0.0146208	-0.0136447	-0.00499307	0.00680774	0.0157023	-0.0143487	-0.00938626	-0.00565634	-0.0122232	0.0024358	-0.0100389	-0.0118575	-0.0262028	0.00213149	-0.0214463	-0.0118891	0.0024832	-0.00944233	0.00883991	0.000456119	-0.0110978	0.031385	-0.000281146	0.00531903	0.00675802	-0.0162973
CS5-H8	0.0730422	0.0362736	0.00577475	-0.123124	-0.022245	-0.0555246	-0.0202283	-0.0217113	-0.0391096	0.0198481	0.019125	0.0227667	-0.0319147	0.0197039	-0.0485347	-0.0204766	-0.00163861	0.0060389	-0.0264041	0.0348851	-0.0314454	-0.0255049	-0.0112228	-0.0290391	-0.0057876	-0.0106028	0.0292376	-0.00918767	-0.00348745	0.0353427	-0.0308643	-0.0128345	-0.00387172	-0.00376934	0.00289743	0.0488026	-0.0135031	-0.0232853	-0.016931	0.00783647	-0.00476174	0.00133966	0.00943653	-0.0140721	0.00602691	-0.00457796	-0.0184035	-0.0129248	-0.00494974
CS6-D3	0.111036	-0.038134	0.107544	0.0282257	0.0401923	0.077666	-0.0246458	-0.0100792	-0.0101678	-0.00895258	0.0181911	0.00689467	0.0191129	-0.0571114	-0.000607196	0.0143608	-0.0364268	-0.00785417	-0.00171775	0.0439908	-0.0526175	0.0166899	-0.0117804	0.0237605	0.0122845	0.00886315	0.00586791	0.00955249	0.00748543	-0.0148064	0.0272978	-0.00459559	0.0154578	-0.0217568	-0.0145455	0.0328327	-0.000656038	0.00534811	0.0340967	-0.0204984	-0.00743488	0.00651004	-0.0119373	0.0179232	0.0263621	0.00583308	0.00812803	-0.0234111	0.0158495
CS7-D3	0.0795906	0.0418963	-0.0912323	-0.0640737	0.00390273	-0.0192388	0.0460379	0.0650627	0.0817271	-0.0216133	-0.0250635	-0.0207969	-0.00609066	0.0385187	-0.0372047	-0.033086	0.00777045	-0.0123899	0.0264227	-0.0219987	-0.0295841	0.0375119	-0.0267468	-0.0108527	-0.0083085	-0.0149841	0.00944054	0.0222951	-0.00313874	-0.0172549	0.0110581	0.00699413	0.0488273	0.0214369	0.0102466	-0.00534716	-0.00237824	-0.0131699	0.00598509	0.0115865	-0.0165616	0.0111481	0.00773958	-0.00493118	-0.0119647	0.0153308	-0.00122068	0.00794884	-0.00844641
CS7-H0	0.0373272	-0.000859784	-0.116245	-0.00261406	0.00218342	0.0302991	0.0137265	0.027182	9.05183e-05	0.0493115	0.0726733	0.0132465	0.00426394	-0.0443856	-0.0630535	-0.0244631	-0.00267278	-0.0157261	-0.0523544	-0.00609084	-0.0292104	-0.0402697	0.041905	0.0262292	0.00254968	-0.0140304	-0.00188612	0.00418012	-0.0314689	-0.0124984	-0.0276391	0.022992	0.0122181	-0.0329604	0.0169066	0.00443069	-0.0225623	-0.00796612	0.00612481	-0.0311221	-0.00288992	-0.00474665	0.0011189	-0.0116941	-0.0165622	0.000397009	0.0125432	-0.00151526	-0.0208901
CS7-H8	0.153008	-0.0109702	-0.197805	0.136586	-0.0422118	-0.0374927	0.0337075	-0.1138	-0.00582891	0.0204398	0.00925764	0.0414033	-0.0292129	0.0584574	-0.0194939	0.0408655	0.0481153	-0.00623969	-0.0016338	0.0490679	-0.0270064	0.0389592	-0.0361374	0.058958	0.013833	0.00634114	-0.00274497	0.0071889	-0.0378571	-0.022629	-0.0233703	0.0210605	0.0162321	0.0232222	-0.0108077	-0.0160134	0.00991953	0.00510089	0.0269215	0.010265	0.0225552	-0.0013873	0.000784543	-0.000987902	-0.0151217	-0.00929941	-0.00733933	0.00213189	0.00105482
CS8-D3	0.110648	-0.00411539	-0.118341	0.00333565	-0.000121211	-0.0414397	-0.0318283	0.0322773	-0.0327667	-0.0190823	-0.0709003	0.0729197	-0.0186234	-0.00832253	0.0464926	-0.00118553	0.0211549	0.0256607	0.0633076	-0.00200088	0.0188733	-0.0134136	0.0328572	-0.00308915	0.0365654	0.0203653	0.00344542	0.0160158	0.0145236	-0.0149617	0.00755283	-0.00812546	0.0079115	-0.00202696	-0.0167537	-1.60055e-06	0.00317259	0.000831624	0.000841736	0.00804517	-0.00893495	0.00131882	0.0165096	0.0291613	-0.0128156	-0.00568883	-0.00354305	0.00959478	0.00662249
CS8-D5	0.00531742	0.0456224	-0.0423778	-0.153954	0.0786922	0.0140102	-0.0291643	-0.0440413	0.0126803	-0.0108669	0.0166772	0.0671323	0.023071	-0.00537125	-0.00102494	-0.0225567	-0.002414	-0.0190078	0.00164085	0.0170848	-0.0315608	-0.0374019	0.0417853	0.0549681	0.00421767	-0.0145019	-0.0273802	-0.00651888	0.012218	0.0364258	0.00641707	-4.46912e-07	-0.00216392	0.00666305	-0.00956806	0.00630671	0.0197475	0.0224967	-0.0126432	0.0207843	0.00462558	-0.00472908	-0.0106526	0.0273701	0.00386347	-0.00899132	0.0242282	-0.000330119	-0.00737628
CS8-H8	0.122448	-0.00110363	-0.00387227	-0.101117	-0.0253938	0.0765346	0.0237878	0.0235997	-0.0225519	-0.00680246	-0.0118334	0.0044316	0.0114206	0.0495097	0.0143273	0.0335387	-0.00325614	-0.0114206	0.0178466	-0.0209938	0.0145114	0.0111009	-0.0240042	0.0672853	0.0237153	-0.0151482	0.0108573	-0.0393648	0.020115	-0.018719	0.0496673	-0.0101509	-0.00514727	-0.00661014	0.0173827	0.0142156	-0.0146004	0.00941071	-0.00744756	-0.00796135	0.0451793	-0.0341357	-0.00480991	0.0204438	0.0077203	0.0250422	0.0149748	0.0285856	-0.00673879
CS9-H8	0.165894	-0.0457486	0.171707	-0.0223062	0.00788626	-0.0236141	-0.00324922	0.00326087	0.0701239	0.0193176	-0.0302979	0.00168447	0.0330713	-0.0174636	0.00472769	-0.00407773	0.0256739	0.0202017	-0.0176798	0.00703738	-0.0265406	-0.0133713	-0.0168323	-0.00376452	-0.0201489	0.0239359	0.00827055	-0.0239449	0.0286061	-0.0308104	-0.00390381	-0.0449913	-0.000133553	0.0260744	0.0113151	0.0272748	0.0259922	-0.0130018	0.00967082	0.0203737	-0.0093585	0.0225524	0.0173767	0.0253427	-0.00144796	-0.00738644	0.00235428	-0.00234625	-0.00497984
TS1-H8	0.0655308	-0.019538	-0.0411263	-0.0829149	0.052937	-0.0306966	0.0166245	-0.0296909	0.0804629	-0.0128227	0.00847077	0.0117231	-0.0373664	-0.0299527	0.0181791	-0.0113373	-0.00960056	0.0696304	0.0114745	0.0442814	-0.0290503	0.0453744	0.00614656	-0.0456723	-0.011474	0.00110125	-0.0237251	-0.00219398	0.00608897	-0.00755979	0.00537573	0.0111895	0.0030347	-0.0116581	-0.00641885	-0.0200485	-0.0155329	-0.00921809	-0.0235519	0.00925017	0.0196077	0.00995722	-0.000427726	0.0142028	-0.0246066	0.02613	-0.0233399	0.00946279	0.00316918
TS2-D5	0.0282087	0.0361433	-0.0278241	0.0802648	0.0404539	0.0202925	0.0313848	0.0289409	0.0337836	0.0208238	-0.0132225	-0.0262513	0.00656789	-0.036587	-0.00967262	0.021123	-0.0221534	-0.0413645	0.00628097	0.0106113	-0.00241969	-0.00386027	-0.00746039	-0.0120941	-0.0172206	-0.0211436	0.0164995	0.0325111	0.00243417	0.0215745	-0.0193454	0.0287639	0.0427701	0.0101562	0.0308962	-0.00513283	0.0286021	0.0244486	-0.00372593	-0.00915608	0.0130684	0.0145111	0.0288175	0.0421011	-0.0016772	0.00652516	0.0123013	0.0318264	-0.00340017
TS3-D3	0.0314077	0.0505541	0.0247885	0.0101004	-0.00463357	0.0463305	0.0397563	0.045373	-0.0400993	-0.0381759	0.0392588	-0.00123334	-0.00965381	0.0891475	-0.0324146	0.0444712	0.0589538	-0.0120691	-0.0185733	-0.0345289	-0.020959	0.00595859	0.037513	-0.0373546	-0.0386407	-0.013391	0.000316513	0.0173016	0.019566	-0.0224189	-0.00221008	-0.0168357	-0.0162154	-0.00336472	0.00678349	-0.0265047	0.018315	0.036171	0.00606175	0.0220028	-0.0019873	0.0297207	0.0074659	0.0152343	-0.0121308	0.0173944	0.00434359	0.0043736	0.0102402
TS4-D3	-0.0226346	0.0220031	-0.0817159	0.0735055	0.0924962	-0.0397781	-0.0384376	0.0284404	-0.0266749	0.0234328	-0.0519286	-0.0270814	0.0595341	-0.0187634	0.0682161	-0.00340196	0.00320725	-0.0410885	0.0424883	-0.00753877	-0.00612417	0.0407209	-0.000425271	-0.0110495	-0.0096599	0.0269133	0.0113462	-0.0324452	-0.0254073	-0.00815348	0.0142364	0.0169558	0.0214702	-0.00883259	-0.00939923	-0.012062	-0.0229162	0.0162476	0.0195241	-0.0396225	-0.0121284	-0.00874718	0.00449172	0.00338953	0.0104317	0.00130675	0.00179759	-0.0104831	0.0105529
TS6-D7	0.170253	-0.0368412	-0.0725938	0.245981	0.111269	-0.049175	-0.0673186	-0.161016	0.0226287	-0.126091	0.0578835	0.00111835	-0.0741857	0.0514687	-0.0510507	-0.0160404	-0.0412982	-0.00324229	-0.0583333	-0.0601229	0.0337335	-0.0158397	-0.0182197	0.000792693	0.0333986	0.015719	0.0105728	-0.0336005	-0.0126364	-0.0467015	0.0179786	0.00762203	0.00791915	-0.0199418	-0.0043402	0.0119614	0.0185819	0.00451542	-0.0134001	0.00668874	0.000870691	0.00366827	0.00329186	0.0119132	0.00696063	0.0220799	-0.0133377	0.01431	-0.00837216
TS6-H8	0.0220667	0.0630192	0.0110218	0.0483076	-0.0234214	0.0723898	-0.0484111	0.00458348	-0.00810877	0.0229245	0.00520127	-0.0319678	-0.0229154	-0.0323303	-0.0368922	0.0352688	0.0545926	0.0132359	-0.0301725	0.0042454	0.00487426	0.0280422	0.00772403	-0.0242469	0.0202306	0.00218645	-0.00102543	-0.0307257	-0.0253053	-0.0209901	-0.0196074	0.00377291	0.0185598	0.0235586	-0.00411053	-0.00162352	0.00297242	-0.0306363	-0.0155904	-0.0186554	0.00485394	-0.00183078	-0.011123	0.00563352	0.00494521	-0.0113928	-0.0137156	0.0217673	0.0347546
WC1-D7	-0.0407604	0.0227574	0.0359292	-0.00581611	-0.0107537	-0.024645	-0.0329006	0.0111949	0.0615008	0.00847818	-0.0410428	0.0127001	0.00467143	-0.0132687	0.0135309	-8.08292e-05	0.0142483	-0.063903	0.0169009	-0.0144303	0.0209271	-0.0142025	-0.00397262	0.0164376	-0.0108322	-0.032175	0.0173565	0.0344249	-0.0208913	0.0126238	0.0115574	0.00287508	-0.0191472	0.0124732	-0.0293337	0.00899428	-0.012327	0.0300259	0.0110476	0.0178938	-0.00882361	0.0274632	0.00734873	0.00693671	0.00890101	-0.00770126	-0.0222939	0.00332448	-0.0147571
WC11-D7	0.0362867	-0.0231014	0.11248	-0.0302965	0.0386718	-0.0293603	-0.0921767	-0.0139615	0.0411467	-0.0430492	0.0265011	-0.00263383	-0.0141162	-0.0479123	0.00663879	0.0337086	-0.000777694	0.0453133	-0.0494749	0.0434883	-0.0024564	0.00656902	-0.029561	-0.032836	0.00192118	0.0143779	0.0179487	-0.0257851	-0.0407517	0.0360534	0.0415803	0.0485769	0.00495096	-0.0188107	0.0152982	0.0298832	-0.0182226	0.0178799	0.0137301	0.0142046	0.0104903	-0.0133216	0.0118068	0.00530068	-0.0152885	-0.00717137	0.0149318	-0.000407838	0.000689084
WC2-D7	0.0759553	0.0653244	0.0584714	0.0223592	-0.0377355	-0.0413268	0.00380139	-0.0338353	0.0418109	-0.0491939	-0.0399439	0.0084355	0.0243025	-0.0182017	-0.0327772	0.0213159	-0.00554436	0.0222452	0.0363914	-0.0101462	-0.000608049	0.0432339	0.0241327	0.00154759	0.0243548	0.00119125	0.0447053	0.00975463	0.0267648	0.0028836	0.0153993	-0.00372936	-0.015699	-0.00029043	0.00952201	0.00813499	0.0202464	-0.0225932	-0.0168311	-0.0167975	0.00639024	-0.0025861	-0.0156355	-0.0149454	0.000538104	-0.0243892	0.0152905	-0.0186245	0.00429733
WC3-D7	0.032367	0.0452822	0.0411836	0.00409247	-0.0148574	0.00198499	0.0237285	0.0161831	-0.0629129	0.0228955	0.0327033	0.00632349	0.000803376	-0.0115659	-0.00523272	0.0184937	-0.0140399	0.0654378	0.00446996	0.00603607	-0.0166327	-0.00307148	0.0131113	0.031996	-0.00633945	-0.0109246	-0.00471697	0.011322	-0.0329476	0.00409353	-0.00442348	-0.0014835	0.00587971	-0.0152342	0.0140132	0.016939	0.0142867	-0.00594102	0.00427533	0.00569889	-0.00160048	0.00270028	0.00328015	-0.00152082	-0.0165034	-0.000214049	0.00879442	0.0215102	-0.00368314
WC4-D3	-0.0257564	0.0584285	0.0123998	0.00608625	-0.0289027	-0.000400064	-0.0384572	0.0184731	-0.0762745	0.0182834	0.0249783	-0.0226047	-0.0059392	-0.0444573	0.00305303	-0.00546211	-0.0160428	0.00173882	-0.0111065	-0.0304508	0.00843747	-0.023981	-0.0328135	-0.00893368	-0.00167726	-0.0317594	0.0155318	0.00935409	-0.0157749	-0.0129637	-0.0107929	-0.0193797	0.00414599	-0.0138674	0.0207599	-0.00111705	-0.000319077	0.0117092	0.0364268	0.01729	0.030737	0.0134719	0.0228976	-0.00552086	0.00966715	-0.0210991	-0.0201993	-0.00240685	-0.0266327
WC5-D3	-0.0296351	0.0403555	0.0261736	0.0493782	-0.0384894	-0.00178738	0.0680766	-0.0481155	-0.00683287	0.00644075	-0.0414279	-0.0372897	0.0559145	0.0327283	0.00907735	0.036131	0.0369372	-0.0191463	0.0351684	0.0315432	0.00923505	0.0125538	0.0206499	0.006863	0.0322058	-0.0121546	0.0100727	-0.00512827	0.0388652	0.0053845	-0.00493958	-0.017969	-0.00368605	-0.0080173	-7.43115e-05	-0.0137444	-0.0195021	0.0106569	0.000364876	0.017103	-0.0122375	-0.0189385	-0.0223325	0.00868304	0.0212591	0.0128233	-0.0191311	0.0122802	0.00304506
WC5-D7	0.0600951	0.00320084	-0.20699	0.0688297	-0.0225075	-0.0358022	-0.0271496	-0.0195196	0.00205334	0.0325156	-0.0385195	0.0334566	0.055096	-0.00152791	0.000675841	0.00562274	0.0303288	0.0498636	-0.0220964	-0.0231598	-0.000512405	-0.0317239	0.00512932	-0.0287915	0.0388849	0.0217334	-0.0197445	0.00607411	-0.00856482	0.0103399	0.0122408	-0.0332892	-0.0182373	0.0275797	0.0279661	0.0134102	-0.0343321	0.0170137	-0.0159915	0.0157957	0.00820743	0.0186195	-0.0174416	-0.0170286	-0.0153806	-0.00217241	0.0134063	-0.00141263	-0.00287776
WC6-D3	0.108621	0.0195285	-0.0475725	0.00338128	-0.0765841	0.0277836	0.00886334	-0.0448592	-0.000212891	-0.0402392	-0.0296053	-0.000480843	0.0503613	-0.05336	-0.0282901	-0.0163128	0.00996506	-0.0260343	0.0197386	0.0520896	0.0199615	0.00417894	0.0117494	-0.0127455	0.00883802	-0.011597	0.0410693	0.00116341	-0.0048081	-0.0227254	-0.0195031	-0.00240225	-0.0104198	0.0101559	-0.0126335	0.0244685	-0.0124545	-0.00755587	0.0222557	-0.00416763	-0.00806351	-0.00355355	0.0212392	0.0151763	-0.00222452	-0.0157379	0.000861344	-0.00253206	-0.00120017
WC8-D3	0.0392616	0.0516132	0.0441076	0.00622445	0.0131221	0.00288299	0.0266666	-0.0373288	-0.0408829	0.0466372	0.0430031	-0.0924057	-0.0421219	0.0513567	0.0395477	0.00458557	-0.01967	0.028084	0.0428861	0.0132594	0.0329579	-0.0513059	-0.0174857	0.00984895	0.0186669	-0.00235714	-0.0194223	0.0295847	0.0081873	0.0182961	-0.0248301	0.0071834	-0.0237932	0.0127915	0.0256092	0.0102574	-0.00376449	-0.0116304	-0.0149347	-0.0331261	0.0120746	0.0010387	0.0173908	-1.8427e-05	0.0351131	-0.00203661	0.00311663	0.00350993	0.0141529
WT10-H8	0.0145066	0.0423489	0.00865592	0.0299308	0.0515224	-0.00876022	0.0788693	0.0316722	0.00117324	0.0490873	-0.0218171	-0.00560216	-0.0175995	0.0175555	-0.0158109	0.0214335	0.0275897	0.00038301	-0.0392917	-0.00721464	-0.0106949	-0.0524836	0.0032933	0.0308251	-0.00036955	-0.0103687	0.0205811	-0.0776563	0.0358992	0.0172943	8.24436e-05	0.0280537	0.00776666	-0.0140763	-0.0103281	0.00248569	-0.0134737	0.00653656	-0.0179423	0.0252526	-0.00783444	0.00192198	0.00856941	-0.010354	0.00124239	0.00958808	-0.0174102	-0.0218043	0.0160322
WT4-D3	0.00576271	-0.0396708	-0.126939	-0.000989722	-0.00966177	-0.0600844	-0.00489333	0.0180763	-0.0301083	-0.011163	0.0405261	-0.07075	0.00212705	-0.0646787	-0.0556542	0.014224	0.0367539	0.0284848	-0.00216926	-0.00709851	0.0192044	-0.0236584	0.0121565	-0.000488825	0.00592812	-0.0012085	-0.022988	0.028208	-0.0166892	0.0219597	0.0358765	0.0247936	-0.0357271	0.00999898	-0.00910567	-0.0205168	0.0135609	-0.00220167	-0.00160054	-0.0157377	-0.0230269	-0.0349196	-0.00575347	0.00604753	0.031967	0.014933	0.011688	0.0072144	0.0225706
WT4-H0	0.0756537	0.017502	0.0595577	0.0282951	-0.0110588	-0.0187853	0.0494147	-0.00164282	-0.0303993	0.0560304	0.0117034	-0.0229281	-0.0139644	-0.0203909	0.0128477	0.0276184	-0.0207723	-0.0429792	0.0224646	-0.0347836	-0.0244812	0.0216649	0.0155408	-0.0328886	0.0139985	-0.0097656	-0.00449309	-0.0063899	0.00741949	-0.00161766	0.0296747	0.019505	-0.0341139	0.0206667	0.0159324	0.0121552	0.0107661	-0.0394572	0.00280096	-0.0106919	-0.0203934	-0.011254	-0.00797939	0.000777819	0.00174457	0.0110758	0.0137294	0.00331861	0.0214511
WT7-D5	0.0755168	0.00116543	-0.0154728	-0.0628372	-0.0626984	-0.0138557	0.0442493	0.00397311	-0.0404756	0.0412682	-0.00968296	0.0111671	-0.00476101	-0.0366587	0.021156	-0.0154643	-0.0262829	0.0133119	-0.00459583	-0.0112983	0.008757	-0.0667363	0.0189815	-0.00445957	0.00923775	0.000102357	0.0276532	-0.00397794	0.0261514	0.00092642	0.0305767	0.0192868	0.0245475	0.013987	-0.015584	-0.013736	0.00417412	0.0151198	0.000686835	-0.000639711	0.0114445	-0.0271771	-0.00367081	0.00149434	-0.0109452	0.0112539	-0.0282103	0.00839725	-0.00384571
WT8-H8	-0.00182811	0.0309171	-0.0985187	-0.159506	0.0582236	-0.106933	-0.088701	-0.00586435	-0.0602119	0.00470872	0.0538577	-0.00850399	0.000788312	0.0755393	0.0668716	-0.0203629	0.00501841	-0.0194301	0.0151644	0.0306494	0.0399455	0.040146	0.0183113	-0.00832334	0.0195773	-0.0379467	0.00400333	-0.0499596	-0.0121763	-0.0382171	0.0289186	-0.00918051	0.0286892	0.00837005	-0.0120733	0.00771424	-0.0154228	-0.0366098	0.000855876	0.00140152	0.0197809	0.0143009	-0.019732	-0.00599862	0.00882298	-0.0055448	0.00795921	0.0141362	-0.00112724
WT9-D7	0.141912	-0.124657	0.104651	0.0584513	0.1283	0.0399469	-0.120221	-0.0120278	-0.0709217	-0.0320254	0.0264179	-0.00826507	0.104868	0.0323239	0.0287493	-0.0125006	-0.0274037	-0.00992364	0.00540806	0.0312945	-0.0183068	-0.0152306	0.0162901	0.0338051	-0.0526702	0.0065136	-0.038001	0.00734129	0.0243242	-0.0298833	-0.0223863	0.0240992	-0.0119462	-0.000657389	-0.00514391	0.00442078	0.0180987	-0.0181651	0.0082256	0.0120803	-0.026749	-0.00999562	0.00387326	-0.0219354	-0.000412318	0.00362871	-0.0228496	-0.0053444	0.00994505
CS10-D5	0.154554	-0.0862186	0.0441429	0.142805	0.054172	-0.0323317	-0.0794647	0.100263	-0.0199331	-0.00174049	-0.00868455	-0.0403729	-0.00430813	0.0011862	0.0448042	-0.0103062	0.0166672	0.00196689	0.0253846	0.0300027	-0.0314555	-0.00481173	0.0126182	0.005048	0.0320691	-0.0555484	-0.0155755	-0.00716368	-0.0216469	0.0159695	-0.0338959	0.0223608	-0.0117338	0.0351719	0.00967711	0.00812404	-0.00753859	0.0117649	-0.0133799	0.0355865	0.0158031	-0.00197247	-0.00700981	0.0014022	0.00664259	-0.0153153	0.0131879	0.00254266	-0.0156643
CS12-D7	0.0506132	-0.0204635	0.0831349	0.0400184	-0.0331312	0.0188362	0.0177583	0.0230388	-0.0149498	0.0351577	-0.0350186	0.0196058	-0.0175715	-0.0263715	-0.0212943	0.0225362	-0.0243524	-0.00493161	-0.0252436	-0.0235142	0.0386573	0.0235463	0.0506321	0.0330835	-0.0165342	0.00195376	0.00684794	-0.0125417	0.018928	0.00873276	-0.0302172	0.00850027	-0.000594132	-0.00469991	-0.0396887	0.0101113	-0.0117286	-0.00907026	0.0334955	-0.0187075	0.00519019	0.00696679	-0.00201819	0.00233657	0.00267597	0.00319631	0.0181524	0.029493	-0.0139137
CS4-D7	-0.101001	0.0111955	0.00651652	0.0133882	-0.00245853	0.00871059	0.0137982	0.0332574	-0.032044	0.016016	-0.0462475	0.00305644	0.00134497	0.00611812	0.00475195	-0.0406141	-0.022199	-0.0172845	-0.0163776	0.0260199	-0.0149828	8.83759e-05	0.000570681	0.0108579	0.00728768	-0.0238972	-0.0488106	0.0249243	0.00773413	-0.00817737	-0.00830657	0.0316719	0.00629627	0.0012575	0.015026	0.00518953	0.00506225	0.0292879	-0.0081104	0.0100818	0.0242465	0.00574733	-0.0158123	0.00723308	0.000629217	0.0063017	0.0290186	0.0170849	-0.0160282
CS6-H8	0.127011	-0.034396	0.0103359	-0.0500962	-0.0333765	0.0269869	0.0286118	-0.0302109	-0.00511746	-0.0070016	-0.062216	-0.0324774	-0.0100769	-0.0330873	0.00961432	0.00101562	0.048225	-0.0101892	0.0255894	-0.00364385	0.00298249	0.00316566	0.00397596	0.000912067	-0.00612998	0.00576635	0.0373669	0.0192567	-0.00523372	0.05023	0.0131254	-0.00465158	0.00460003	-0.00901165	-0.0273596	0.0164066	0.0144411	-0.0264307	-0.0198181	-0.00982717	-0.00843085	-0.00738834	-0.0140528	-0.00335209	-0.00972233	-0.00638646	0.0176076	0.00845165	-0.00866293
CS8-H0	-0.0913112	0.0420421	0.000919628	-0.0387733	0.0579952	0.0475409	0.00410768	0.0140774	-0.0366119	-0.0240134	-0.023724	0.0594008	-0.00568723	0.0115442	-0.0112215	0.00482796	-0.0114682	0.0125762	0.000782074	-0.0128468	0.0180758	-0.0564442	-0.00343376	0.00937039	0.0354086	0.0450897	-0.0313943	0.0164548	-0.00942775	-0.00259252	-0.00949091	0.0178943	-0.00925222	-0.0082037	-0.00258717	0.00165465	0.00397422	-0.0168858	0.00820057	0.000301923	-0.00650147	-0.0119031	-0.0210369	0.0354921	-0.0250472	-0.016425	-0.00643513	-0.0047534	0.00903518
CS9-D7	-0.0198907	0.0739212	-0.0484683	0.0454342	-0.00786748	0.0755289	-0.0472088	0.0745318	0.00884885	-0.0235615	0.0331794	-0.0320365	-0.00126022	0.0504285	0.0157379	-0.0346657	-0.0265884	0.00938919	-0.021521	-0.00385429	-0.0167505	-0.00141586	-0.00729879	0.00137529	-0.00683498	0.0140705	0.00497611	-0.0237321	-0.0312607	0.00199732	0.0127952	-0.0104693	0.0110036	-0.00604585	-0.00514934	0.0105546	-0.0342083	0.0125036	0.00502312	0.0227298	-0.0119669	-0.0160049	-0.00511169	-0.0115181	0.0115235	0.00240978	0.00695958	-0.000791768	-0.00246347
TS2-D7	-0.00453509	-0.0156678	-0.108788	-0.0510416	-0.0372988	-0.00193843	0.0791505	0.0497271	0.0334863	-0.011994	-0.0534924	-0.018953	-0.00870414	0.00394071	0.0444983	-0.00986165	-0.010155	-0.00230379	-0.0319173	-0.0245419	0.0225187	0.0053574	-0.0662453	-0.0136986	0.00537717	0.00560102	-0.00528251	0.0090451	0.0030633	-0.0246483	0.00937571	-0.0195988	-0.00610005	0.00870478	0.00751473	0.00655244	-0.0237403	0.00870249	-0.00967621	-0.00951246	0.000937486	-0.0340673	0.0038948	0.0398513	0.000101163	-0.00927579	0.00119325	-0.00493555	0.00276475
TS3-D5	0.0228143	-0.192325	-0.0422426	-0.0353201	0.043706	0.0186808	-0.0101717	0.0132235	0.0223616	-0.114042	0.043857	0.0148106	-0.000526575	-0.0774464	-0.0168834	-0.00213729	-0.00475211	-0.031995	-0.0001107	-0.0226667	0.00637802	-0.0401811	-0.0160457	0.0175012	-0.0264022	0.0162138	-0.0460019	0.0250033	-0.0139293	-0.0122165	0.0125597	-0.0392109	-0.0228841	-0.01247	0.00558681	0.0215787	-0.0150574	0.0165953	0.00342054	-0.0243159	0.00112269	0.0121271	-0.00431676	-0.00445042	-0.00607628	-0.0427883	-0.00952555	-0.00100317	-0.0171517
TS3-H0	0.0787436	-0.0497379	0.0907265	0.0249493	-0.077945	-0.0130907	-0.00340224	0.0951239	-0.0459772	-0.0433024	0.109662	0.0236639	0.026678	-0.027882	0.0203903	0.0211279	0.0240429	0.0210583	-0.04444	-0.0193761	0.02147	0.0142193	-0.00560606	-0.0364816	-0.0124715	-0.00972739	0.00515716	0.0143145	0.00116387	0.0136825	0.0293448	0.0465371	-0.00147377	0.0278893	0.0218612	-0.0103563	-0.00310719	-0.000984434	0.0321711	-0.0104529	-0.00440729	-0.015434	0.00746315	-0.00490376	-0.00939496	-0.0209413	0.00893404	0.00475695	-0.00455389
TS4-D5	-0.01596	-0.0187625	0.0424943	0.0366076	-0.0262356	0.0190038	0.0197126	0.0155334	-0.0130308	0.0435872	-0.0219273	0.0283931	-0.0395009	0.037202	0.0218397	0.0175785	0.000306654	-0.0231656	0.024385	-0.0156343	-0.0191958	0.00133453	0.00357892	-0.0383319	-0.01629	-0.0405421	-0.0273939	-0.0453621	0.00123173	0.00893898	0.0114629	-0.00256347	-0.0173916	-0.00228074	0.00155809	-0.00425516	-0.02111	0.0348395	0.0396454	-0.0444429	0.00201803	-0.00440844	0.004958	-0.0176019	-0.000713529	-0.0135141	0.00152743	-0.000597531	-0.00522467
TS5-H8	0.00258303	-0.0204621	0.0434158	0.0806172	-0.0658296	0.0748771	-0.0220016	-0.071771	0.0175732	0.0354344	0.0122738	0.0340989	0.0179359	0.0354443	-0.0295387	0.0719151	-0.0597161	-0.0153002	-0.00626856	0.00966522	0.030343	-0.0218873	-0.0169323	-0.0255871	-0.00692174	-0.0484116	-0.0160652	-0.00581443	0.0273725	0.0455118	-0.0068156	-0.0286267	-0.00101113	0.00717379	0.00862106	-0.0213188	-0.0443461	-0.0163634	-0.00885013	0.00492171	-0.0142597	0.0174035	-0.00716881	0.0168893	-0.0350151	0.00855837	0.00704752	0.0101322	-0.00390881
TS6-D3	0.0814561	-0.00338984	-0.00408126	-0.0794549	-0.0341523	-0.00381528	-0.0354354	-0.0217095	0.0560448	0.0413738	-0.00965399	0.015183	-0.00884661	-0.0666623	0.0401489	0.00458025	-0.0098483	-0.0106899	0.00395318	-0.016113	-0.00945193	0.0165683	0.0166513	0.0500878	-0.0104791	-0.025374	-0.0391009	-0.00448654	0.00481116	-0.00102048	0.0146201	0.0120851	-0.0102978	0.00762381	0.0109886	-0.0161265	-0.00815628	0.0236546	-0.0119033	0.0272126	-0.0354298	0.027922	-0.0198173	-0.00254866	-0.0200681	-0.00388043	-0.0133439	0.0298867	0.0142417
WC10-H8	-0.0112151	0.0305489	-0.0799373	-0.113248	0.0722477	-0.0168609	-0.00699148	-0.0148019	0.0417918	-0.0198924	-0.0142936	0.032798	-0.00280305	-0.0304583	-0.0566496	0.00600152	-0.0184824	-0.00762105	-0.0183708	-0.00482296	-0.0027832	0.000222738	-0.011518	0.00242201	-0.00110315	-0.00230031	-0.0153508	0.0104558	-0.0279352	0.00404341	0.0242989	-0.0298	-0.0230888	0.00212848	-0.00154185	-0.0170364	0.0165001	0.0167838	0.00590346	-0.0140242	-0.0202996	-0.00283071	-0.00353846	-0.00544898	-0.0180528	0.00607031	-0.00761396	0.017423	0.00948903
WC4-D7	-0.0108909	0.0192196	-0.0302776	0.0565426	0.0483643	0.01137	0.0321329	0.0282468	0.0264926	-0.000287514	-0.00112222	-0.0315342	0.00520351	-0.0504817	0.00367302	-0.00114417	-0.0244197	-0.0167793	0.0449087	-0.0049759	-0.00230311	0.0227725	-0.0438809	0.031263	-0.0161849	-0.00178761	-0.00803164	0.00474594	0.00166177	0.0018298	-0.0284069	0.0206274	-0.00222813	-0.0143612	-0.0445305	-0.0245533	-0.00322985	-0.0129544	-0.0107757	-0.0139931	0.0162775	0.0361704	0.012571	-0.0124901	-0.00674849	1.92369e-05	0.0182554	-0.0018755	0.00371452
WC4-H8	0.071821	0.0377664	-0.0494634	-0.0645534	-0.0753539	0.00510717	-0.043639	0.0330404	0.0479002	-0.0373397	0.0338355	-0.0265034	0.0144884	0.0196889	0.0402707	0.0213408	-0.0222509	0.0153835	-0.00261868	0.0318782	-0.0547491	0.000273968	-0.00912013	-0.00731224	-0.00261906	0.0191437	-0.0130965	0.0532157	-0.0411202	0.000858553	-0.00311522	-0.00811338	0.000747051	0.00466782	0.0285491	-0.0163308	0.0222712	0.00742122	0.0181719	-0.0106513	0.00801411	-0.00359506	0.00503519	0.0041004	0.0218873	0.00334165	0.0128448	-0.00647957	0.014958
WC5-H8	0.0567834	0.103864	0.045023	0.0123281	-0.0812778	-0.0198311	0.0177522	0.00226583	0.0466542	-0.0204626	0.016368	-0.0267052	0.052048	0.0615239	0.0348642	0.00544754	-0.0116076	-0.0261301	-0.0328071	-0.0098104	0.00214092	-0.00298323	-0.0141203	0.00129107	0.0367513	0.00437934	-0.018053	-0.0158328	0.00121081	0.0442801	-0.00744815	-0.0139966	0.00330077	0.0280298	0.0151056	0.0255637	0.00611457	-0.0167845	-0.00780251	0.00206291	0.0236482	0.011421	0.00965609	-0.00249945	0.0026254	0.00777797	0.00117951	-0.0251069	0.00450436
WT10-D3	-0.0158382	0.00377868	0.0254931	0.0361122	-0.0352047	0.0483129	-0.0182609	-0.00842321	-0.0016588	0.0758004	-0.000828327	0.036998	-0.0152865	0.0155998	0.0172376	0.0343033	0.053367	-0.0200901	-0.0252652	0.0271953	-0.00344303	0.00294907	-0.0219018	-0.0273045	-0.0223157	0.00700453	-0.0219858	-0.0125651	-0.00934628	-0.0130523	0.0439703	0.0159101	-0.0283327	-0.0124185	0.0316323	-0.00980527	-0.0280419	-0.0130939	0.0045863	0.00409119	-0.00924358	-0.0216933	-0.011465	-0.030452	0.00593174	0.00120133	-0.00629364	0.0209952	0.010146
WT3-D7	-0.0501685	-0.0244074	0.0491215	0.0454331	-0.0225154	0.00079685	-0.0700896	-0.0243632	0.0978706	0.00474664	0.03566	-0.0428463	-0.0684268	0.0458508	-0.0285188	0.0283044	0.014187	-0.0213765	0.0044703	0.0328208	0.0549094	-0.0342009	0.00442512	-0.000442535	-0.0167555	-0.0143644	0.00736132	-0.00671993	0.00648287	-0.00466808	-0.00921637	0.006427	-0.0167682	0.0429226	-0.0304495	0.00597129	0.00915716	-0.00352176	-0.0196756	-0.0362486	0.00262215	-0.0119303	-0.00987963	0.00322868	-0.0201867	-0.00455419	-0.00277613	-0.0152706	-0.0283265
CS1-D3	0.0128449	0.029134	-0.0932842	-0.0647431	0.0353108	-0.0305348	0.0653772	0.00671468	-0.0544157	-0.00269639	0.0146238	0.0250817	-0.00709038	-0.0301512	-0.0176908	0.00892249	0.0251993	-0.039631	0.0402819	0.00628902	0.00582799	-0.0330724	0.00696111	-0.00152275	-0.024592	0.0157095	0.0400712	0.00849792	0.00442196	0.000984237	-0.00501152	0.0230153	-0.00372869	0.0089966	0.0269003	0.0146866	-0.00115239	-0.0162158	-0.00190169	-0.0112144	0.00567887	0.000618034	-0.00721244	-0.0234396	0.0139563	-0.00932408	-0.00890276	0.00663459	-0.0198705
CS3-D3	0.0764698	-0.0156533	0.0426765	0.0472798	0.0934354	-0.00719894	0.0636782	0.0279809	0.0174489	-0.0562096	0.0171105	0.0131615	-0.0131693	-0.0476571	-0.0225458	-0.0172249	0.00372739	0.00938829	0.00325616	0.00582883	-0.0204566	0.0206428	0.0392255	-0.0130641	-0.00733304	-0.042826	0.010173	0.0335748	0.00314013	-0.0184392	-0.0326523	0.00349579	-0.00699498	0.0278304	-0.0076481	-0.0210484	-0.0170003	0.000823521	-0.0191258	-0.023223	-0.0181292	-0.0117893	-0.00218558	-0.0341694	0.00549633	0.00800495	0.000987489	0.00278939	-0.000866567
CS5-D3	0.0200861	0.0630627	0.0297211	-0.0167665	0.0492978	0.0161858	-0.0268694	-0.00876293	0.0766294	0.0170955	0.0290856	0.0124455	0.0112621	-0.00533222	0.0667537	-0.0082719	-0.000625522	-0.0282085	0.00591913	-0.00640419	-0.0330433	-0.0163067	0.0125677	-0.0267848	0.0450103	-0.0273455	-0.012112	0.00098498	-0.041365	0.0052121	0.0147719	-0.00499387	0.0163625	0.0098432	-0.0340122	-0.0125816	0.021386	0.00451282	-0.0373003	-0.0085788	-0.00384177	0.00238827	0.0198487	-1.53612e-05	0.0212909	-0.0165961	-0.00515048	0.00395478	-0.0118085
CS6-H0	0.00563538	0.0729493	-0.0473097	0.0319886	0.0189695	-0.00643618	0.068479	0.0524564	-0.00486304	-0.0239738	0.00262686	0.0351224	0.0220081	0.0465577	0.0202936	-0.00519168	-0.0200062	0.0250814	-0.0288488	-0.0156964	0.00202358	-0.0247922	0.00180481	0.0087864	-0.0394083	0.0135645	0.0350026	-0.0174778	0.0320174	0.0205205	0.0228791	-0.00296766	-0.00289767	0.00156694	0.0239698	-0.00863654	-0.0328841	0.0114708	-0.00126542	-0.0146804	-0.00879949	0.011321	0.0191853	0.0176065	0.0127497	-0.00882921	0.00402166	-0.0248841	0.00241552
TS2-H0	-0.00606501	-0.0687751	-0.152519	0.0138564	0.0207071	-0.0699191	-0.0511338	0.0129803	-0.0392148	-0.0371165	-0.0365417	-0.0509362	-0.0137117	-0.0481328	0.00496085	0.0410626	-0.00616127	0.0359425	0.00367195	0.0269081	0.0321579	-0.00440694	-0.00149892	0.0043495	-0.0340786	-0.0365131	-0.00402241	-0.0181099	0.00454141	-0.0111009	-0.0254415	0.00735886	-0.0224102	-0.000235762	-0.0338022	-0.0180646	-0.0050607	0.00326032	-0.0109028	0.00956807	0.00340368	0.0300988	-0.000920072	0.00638537	-0.0225559	0.0199233	0.00408007	-0.0104555	0.0141334
TS8-H0	0.0450452	0.0232709	-0.0223886	0.106612	0.0264047	0.0152784	0.0422564	-0.00236955	0.0483552	-0.0284243	-0.00325634	0.000188901	0.0393348	-0.0658839	-0.00427311	-0.0217016	-0.012644	0.0566142	0.057401	0.0134346	0.0184221	0.0117348	-9.64161e-05	0.00317217	-0.023302	-0.0582826	-0.0323077	-0.0367921	0.0153371	0.00713985	-0.0096765	-0.046975	-0.0127041	0.00923172	0.0296024	-0.0298847	0.00777115	0.00774923	0.0121145	-0.000713292	0.0245698	-0.00480606	0.0054279	0.00976426	0.0139758	-0.0074053	-0.00791797	0.00623881	0.00540705
WC4-D5	0.0369989	0.023983	0.0653074	-0.00234116	-0.00103949	-0.00537627	0.0196143	-0.022056	-0.0764381	0.0295084	0.0169068	-0.0113923	-0.0297282	-0.025217	-0.039693	-0.00547791	-0.0161421	-0.0266981	0.0200056	-0.0124239	0.037929	0.0432694	0.00981124	0.0100659	-0.0250622	0.0209193	-0.0104321	-0.00107924	-0.00672334	0.00962086	0.0201576	-0.0196651	-0.0161364	0.017603	0.00797965	-0.0110282	0.0282891	-0.00122227	0.00989642	0.00704405	0.0331136	0.00681954	0.00996336	0.0114835	-0.0236789	0.00997132	0.00921713	-0.00624416	-0.000758817
WT2-D3	0.00326376	-0.0442294	-0.111506	-0.00340348	-0.05777	0.00766488	-0.122989	-0.0223947	-0.0798036	0.0562895	-0.0790353	0.0400907	0.0159882	0.0215662	0.00609842	0.0085454	-0.0184928	-0.0100438	-0.0264756	0.00302504	0.0351061	0.0253552	-0.000523246	0.0224152	-0.0446013	0.00739365	-0.0245974	0.00143944	0.0116253	0.00984987	-0.0166592	-0.0166913	0.0166008	-0.00308528	0.00542848	0.049318	0.00624159	-0.00957584	0.00888615	-0.0248389	-0.00274532	0.0123084	0.00462978	0.00424924	-0.000876609	0.0109974	0.00174251	-0.00687406	-0.0290395
WT7-H0	0.0210089	0.067634	0.0394932	-0.0034258	0.0171951	0.0107421	-0.00869373	-0.0279722	-0.0582785	-0.0194046	-0.0268722	-0.0374845	-0.0323566	-0.000245101	-0.000838754	0.00456906	-0.0206175	0.0230197	-0.0224561	-0.00797121	0.015107	-0.00609706	-0.01522	0.0325883	-0.0150565	0.0115479	0.00546789	-0.0144529	0.00789017	0.0213677	-0.00844022	0.000613041	0.00977094	0.002273	0.00990791	0.0226118	-0.0208619	-0.0182925	-0.057968	-0.0228687	-0.0148096	-0.00120809	0.0124029	0.00477299	-0.00886605	-0.0165682	0.0100703	0.00664923	0.00296542
CS2-H8	0.0174854	0.0143156	-0.0930233	-0.0574837	-0.00270821	0.00609357	0.0940093	0.062661	-0.00419882	-0.0165006	0.00341339	0.00806487	0.00819651	-6.92084e-05	0.00683777	-0.0297801	-0.0212154	-0.0071246	-0.0297344	0.0455232	0.0233806	0.037226	0.0150934	0.0414113	-0.0202902	0.0106432	-0.0277565	-0.013821	0.00865277	0.00243134	-0.0377304	0.0289101	0.00168835	0.0120333	-0.00793988	0.0152332	0.00691345	0.0411679	-0.00358979	-0.0162422	-0.0100252	0.013281	-0.016044	0.00540618	0.00663337	0.00173939	0.00326104	-0.020576	0.0177792
CS9-D3	0.0192497	0.0416522	-0.0465472	0.0525228	0.042368	0.0441793	0.0300963	0.0160301	0.0655328	0.0612547	-0.0157832	-0.00498225	-0.0130967	-0.0268275	0.028191	-0.00294395	-0.0257657	0.0364718	-0.0277093	0.0265471	0.0189865	-0.0332382	-0.0393023	-0.00248273	0.0189485	0.0297379	0.0337157	0.029416	-0.0122192	0.000395494	0.00684722	0.00871002	-0.0123015	-0.0206094	-0.0154855	-0.0173824	0.0030416	-0.0116609	-0.00765331	-0.00893006	0.000397462	0.030815	-0.0067488	-0.00817624	-0.010713	0.0148527	-0.0159767	-0.0034467	-0.0113394
CS9-H0	-0.0594504	0.077613	0.0262825	-0.0813294	0.0561473	0.00585615	-0.0352255	0.0457753	0.0220523	-0.0953039	0.0363522	-0.0314089	0.00440159	0.0349467	0.0222034	0.0186834	-0.0028118	-0.00650013	0.0149289	-0.0564507	0.0133105	0.0238091	0.0222218	0.0236945	0.00945636	0.00479392	-0.00403887	0.0094844	0.010457	-0.0146023	-0.00425918	0.0382185	0.0350476	0.0150859	-0.0317151	-0.00407583	-0.0344646	0.016354	-0.00778039	0.0315221	0.0316003	0.00380255	0.000336486	-0.0133845	0.00563797	-0.00594426	-0.0168439	0.000681222	-0.000887257
TS8-H8	0.14222	-0.0283058	-0.0298016	0.0465019	-0.176309	-0.0105443	0.0579356	-0.127668	-0.0130658	-0.0179375	0.0458514	0.0165959	-0.0333505	-0.026401	0.0443479	-0.0123612	-0.0155077	0.010883	0.0329595	-0.0184988	-0.0169086	-0.0380638	-0.0190974	0.0267257	-0.0107739	-0.0355186	-0.0459682	-0.0227275	-0.0302629	-0.0155561	0.0220288	0.00480869	0.0302671	-0.0272204	0.000624897	-0.00377222	0.0158019	0.0246961	-0.0230619	0.0196956	-0.010532	0.00920066	0.000746206	0.0152039	0.0159662	0.015492	0.00649449	-0.0199065	-0.00589241
WC2-H8	-0.00507149	0.0200038	0.0819288	-0.0400095	-0.0296737	-0.0436333	0.00766798	-0.0152623	-0.0161626	0.0511867	0.00377366	-0.00901814	0.043287	0.00853077	-0.0482844	0.0240873	-0.00871342	0.0458345	0.0467823	-0.00912798	-0.0162033	-0.0265153	-0.0458015	-0.0166347	0.0109753	0.0146317	-0.00643347	0.00620688	0.0338691	-0.0161768	-0.00359412	0.0570108	0.0211288	0.0611392	0.00280644	0.00447145	-0.00122868	0.0298813	0.0143874	0.00735393	-0.0266738	0.0375187	-0.0503903	0.00898545	0.0207705	0.0221557	0.00224027	-0.012548	0.00494905
WC7-D3	0.0253264	0.0661452	-0.00166681	0.0698762	-0.0260612	-0.0196506	0.0238781	-0.0301756	-0.0260504	0.0143271	0.0497506	0.00490005	0.0283058	-0.0343637	0.016514	-0.0320076	-0.020759	-0.0277531	0.0228523	0.0320563	0.0224374	0.0447157	0.0245975	-0.039667	0.0199553	-0.0232914	-0.0170864	0.00787029	-0.0187423	0.00825248	-0.00391675	-0.00126819	0.0153624	-0.0193031	0.0153366	0.017012	-0.0337267	-0.00900684	-0.00483687	-0.00558218	-0.0111841	0.0128218	0.00113962	-0.00441276	-0.00235334	-0.00493081	-0.0230551	0.00453397	-0.00802689
WC7-D7	0.0538934	-0.0353532	-0.0503409	-0.118337	0.135622	0.0590251	0.0971439	-0.0881191	0.0159145	0.024662	-0.0265514	-0.0757686	-0.0455133	-0.0113948	-0.0153909	0.0541437	-0.0448507	-0.0227608	-0.0417918	-0.0223012	0.0244722	0.0130511	0.0173963	-0.0100664	0.00185929	-0.0122782	0.00521591	0.0331052	-0.0049029	0.00713235	-0.0227343	0.00872056	0.0461438	-0.0294803	0.0245956	0.00248346	0.00383696	0.00242122	0.0191528	0.0208267	0.00535107	-0.00743025	0.00636137	0.0194353	-0.00356315	-0.00547838	0.0259258	-0.0156855	-0.00708221
WC9-D3	0.0425623	0.0462935	0.0443117	0.0207294	0.0112825	0.0530101	-0.0232639	-0.0359831	-0.0153586	-0.00035159	-0.0354089	-0.0402559	-0.010585	-0.0407949	0.0306736	0.00937531	-0.0135079	0.00523008	0.0051848	-0.0531451	0.0289967	-0.0044791	0.00406825	0.0170326	-0.036369	-0.00949949	0.00413114	0.0178922	-0.0132034	0.00914497	0.00715724	-0.0115121	0.0140398	0.0201771	0.0293512	-0.0121134	-0.00909878	-0.0183714	-0.00857303	-0.00769735	-0.0265024	0.00344254	-0.0117034	-0.00492908	-0.0343245	-0.00815923	-0.024084	-0.0262337	0.0150363
WT3-D3	0.106041	-0.0089607	-0.0257551	-0.0559682	-0.0747674	0.0234557	0.0347941	0.0413801	-0.000205839	-0.0343854	-0.0292313	-0.0233674	0.0180887	0.0010121	0.0471332	-0.0174401	-0.0400809	0.00212367	-0.0218082	-0.0259009	0.00787339	-0.0110205	-0.0108636	-0.0250409	0.00715448	0.012879	0.0334102	-0.0249787	0.0137879	-0.0635623	-0.0360723	0.0256883	-0.0245565	0.0175471	0.00187237	-0.00631619	-0.018591	0.0062301	-0.0106881	-0.00515656	-0.0167814	0.00485723	-0.0148457	-0.0238106	0.0129797	-0.00156976	0.0243445	-0.00910557	-0.00299298
WT5-D3	0.03266	0.0558833	0.0408134	0.0511008	-0.0446707	-0.0232214	0.0105733	-0.0196088	0.0902361	-0.0054496	-0.0105806	-0.0347828	0.0793499	-0.0312161	0.0133491	0.0399335	0.0379575	0.00819016	0.00979995	-0.0303659	0.00537457	-0.0088537	0.0193419	-0.0221795	0.0113759	-0.00170489	-0.0164678	-0.0181388	-0.00672183	-0.00345123	-0.0293448	0.0130795	0.0208848	-0.0450213	-0.00692024	0.0155491	-0.0110109	-0.0115461	0.00393178	0.0380413	0.0117697	-0.0120905	0.00980686	-0.000816577	-0.00405532	0.00824447	0.0192334	0.00248047	-0.00824564
WT8-D7	-0.0477678	-0.0375815	0.0577356	0.0116816	-0.0739897	-0.0372853	-0.0360059	0.0125833	0.0669278	0.0839381	0.0260896	0.0321131	-0.0173642	-0.0230475	-0.0151973	-0.0618759	0.0127618	0.00933216	-0.0347956	0.0124349	0.0513634	-0.000790886	0.0427705	0.0568833	-0.00440383	0.00658441	0.0112044	0.0549553	-0.00365109	-0.0527465	0.0209006	0.0175658	-0.000733563	0.0326956	-0.0056762	0.0117347	-0.00916045	-0.00477526	-0.00941807	0.0250152	0.00875256	-0.0174135	0.00999489	-0.0126215	-0.00777235	-0.0237305	0.0065295	-0.0156504	0.00939994
WT9-H0	0.0346084	0.0609481	0.0664629	-0.0367491	0.00938106	0.0038306	-0.0270866	-0.0466907	0.0290839	0.047994	0.00126407	-0.00607711	0.00710629	0.00999814	0.00827061	0.0522912	0.0522904	0.00839594	-0.020101	0.00402264	0.0045311	-0.00234443	-0.012962	0.0589924	-0.01632	-0.0267856	0.0454135	0.0366628	0.0109203	-0.0124686	0.0288972	-0.0126238	0.0206394	-0.00185714	0.00777286	-0.0274516	0.00367276	0.0169665	0.0168922	0.00890592	-0.00707496	0.00396361	0.0102255	-0.0210314	0.00636272	-0.0224756	-0.0198753	-0.000980429	0.0275969
CS2-D3	0.0281164	0.0621196	0.0372056	0.00995815	0.0706379	0.0339048	-0.00319719	-0.00725811	-0.0313012	-0.0107882	-0.0103075	-0.0406205	-0.033706	0.0126748	0.000567485	-0.0077154	-0.0381319	-0.0261606	0.0115371	0.0625922	0.0067243	0.015683	0.0283823	-0.0119562	-0.00188324	-0.0141581	-0.00273289	0.00270536	-0.0257793	0.0337967	0.025362	0.0245108	-0.0149629	0.0052826	0.0121092	0.0149166	0.0174311	-0.00695038	0.0179136	0.0123581	0.018044	0.00492869	0.0289762	0.0220928	0.00571961	-0.000551629	-0.0287646	-0.0127304	0.00248707
CS4-D3	-0.00443545	0.0682956	-0.00098121	0.03971	0.0156058	0.0167552	-0.0298916	0.0133916	-0.0179052	-0.0171507	-0.00964607	-0.0279774	-0.0190671	-0.0226404	0.0177446	0.00602687	-0.0080906	0.00852041	-0.0188489	0.0201113	-0.00753249	-0.0623422	0.0057911	-0.0270739	-0.00793254	-0.0229757	0.0466018	-0.0514429	0.0280023	0.0147039	-0.00451879	0.0101951	0.00543774	-0.00804165	0.00354686	0.00179952	0.030739	0.0250546	0.0359346	-0.0088778	0.00294638	-0.0164332	-0.00636566	0.0178168	-0.0011698	-0.0069577	-0.0060499	-0.00236424	-0.00396945
CS6-D7	-0.0225925	0.0804291	0.0138886	-0.0157668	0.0372886	0.00927775	-0.000160897	0.0365624	-0.0427267	-0.0317301	-0.0173524	-0.00262559	-0.0169396	-0.0244064	0.00586124	-0.000384752	0.0202309	-0.0230565	0.0101913	0.00551112	0.0341227	-0.0246869	0.0268358	0.00371074	0.0195475	0.0428607	0.00406757	-0.0271772	-0.031923	0.0166869	0.00106498	0.00351983	-0.0285067	0.00355605	0.00396077	-0.00646597	-0.00624298	-0.00220834	0.0031207	0.0330808	-0.0130217	-0.00997497	-0.000242951	-0.00124207	0.0132118	0.0160715	-0.014224	-0.0164587	-0.0123106
WT2-H8	0.00722812	0.0788317	-0.00451094	-0.0146837	0.0395317	-0.070921	0.067183	0.0158255	0.0496238	0.0995554	-0.00708067	0.00932158	-0.0170706	0.00708738	-0.00943483	-0.0469176	0.00605426	0.0198329	-0.00548896	-0.00959139	0.0228217	-0.00886465	-0.0258597	0.0166754	0.00440541	0.00474054	-0.0061307	-0.00925024	-0.011834	-0.0133868	-0.0244723	-0.00749195	-0.0205607	0.00580467	0.0183425	0.0214181	-0.00148766	-0.0215156	0.0201335	-0.00520475	-0.00327714	0.0119276	-0.0104198	0.00287999	-0.00491272	-0.0208092	0.0299166	0.0112491	0.00892784
WT5-H0	0.076282	0.0900489	0.0444836	0.0632748	-0.0449276	-0.0225031	0.0604272	-0.14125	-0.0632747	-0.0904706	-0.0147023	0.0993191	-0.0299763	0.0178024	-0.0249917	-0.0858857	0.0145817	-0.015542	-0.0274014	-0.0061598	-0.0183718	-0.00981453	-0.0207698	-0.0196689	-0.00815642	-0.0133259	-0.00735705	-0.00264532	-0.0108758	0.000553607	0.00302444	-0.0169347	-0.00788615	0.0213307	-0.0123776	-0.0131808	0.0209339	0.00328467	0.00561836	-0.0142009	-0.00902258	-0.00868821	-0.0169224	-0.0129933	0.0140765	-0.0123432	0.00259665	0.0161724	0.0133525
CS11-D7	0.0450116	-0.0395463	0.137671	-0.0289254	-0.00574355	0.00163768	-0.0372306	0.0468006	0.0482748	-0.00399755	-0.0449212	0.0733738	-0.00638613	0.00648655	-0.0193298	0.00168909	0.0186734	0.0178742	0.0522652	-0.0556463	0.0550813	-0.0242502	0.0279821	0.00251315	-0.0276285	-0.0156997	-0.0327679	-0.0404489	-0.0183454	0.0430297	-0.0143275	0.030996	0.0433938	0.0211784	0.0148876	-0.0125329	0.0114835	-0.00807618	-0.0108134	-0.0055981	0.00625949	0.000609243	-0.00457604	-0.0114075	0.0115111	0.00553829	0.00224722	-0.0119676	0.00375102
CS5-D7	0.0318701	0.0758719	-0.000525294	0.0153149	0.00114364	0.0440283	0.054382	0.0602311	0.0173597	-3.77878e-06	-0.0155146	-0.0487964	-0.0213059	0.0391834	0.0247522	0.0347161	0.0226512	0.00123571	-0.0366658	-0.0370628	-9.78998e-05	0.0257896	0.0213405	0.00871619	0.0270084	0.0220988	-0.0058013	0.000893237	0.00702833	-0.0109498	0.0079512	0.00890762	-0.0207652	0.0075095	0.0212957	-0.00494668	0.0278687	-0.0152995	-0.00195869	0.00351605	-0.02311	-0.00639867	0.00216023	0.0178751	-0.0166569	-0.00907945	0.00184871	0.0035618	-0.0122132
CS8-D7	0.0132675	0.0775324	-0.00447886	0.0172112	0.0327694	0.10502	-0.0249737	-0.0187389	0.0206311	0.0519483	-0.00633849	-0.0176639	0.00374083	-0.0218258	0.0122055	-0.0262636	-0.000238212	0.00867818	0.0106259	-0.0294253	0.0489142	0.00102122	0.00345899	-0.000871584	0.00592402	0.0296788	-0.0294739	0.0573239	0.00889717	-0.028791	0.0113881	-0.00388006	-0.0247927	0.00195914	-0.01175	0.0118201	0.0127794	-0.00492496	0.00710045	0.0328194	-0.00683193	-0.020011	0.00539971	-0.0225813	-0.0224367	0.0286163	-0.00981951	0.0107049	-0.00106349
TS1-D7	0.0374086	0.0879013	-0.0721576	0.0391131	0.154212	0.0799599	-0.104515	-0.0463054	-0.0451663	0.0397252	-0.00632182	-0.00564265	0.0578414	0.0304631	0.0115721	-0.0436146	0.0158417	0.0438643	0.00689189	-0.0256573	-0.0205828	0.0110469	0.0296315	-0.0265337	0.0281621	-0.00377005	0.0203698	0.0089918	0.018444	0.00344318	0.00346788	0.00519848	-0.0150229	0.0263964	-0.0361032	0.000230687	0.0116824	-0.00743339	0.00569113	-0.0136166	0.00703899	0.00578175	-0.0130164	0.0108584	-0.0214718	-0.000337583	0.00709551	-0.0260398	0.000711971
TS1-H0	-0.0495883	0.00680374	-0.0592956	0.112981	0.00710915	0.0218882	0.0186941	-0.00726044	0.0354436	0.0110838	0.00343326	0.0512496	-0.0821265	-0.000595459	-0.0172111	-0.00601819	0.00226516	-0.0248256	-0.00655722	-0.0229771	-0.0123119	0.00457422	-0.0527858	-0.0118006	-0.0435065	0.00503033	-0.0248454	0.0321626	-0.00441545	0.0247163	0.000783701	0.032899	0.00642543	0.0337939	-0.0395262	-0.00620249	-0.0193935	-0.0154533	0.0264703	-0.00977645	0.00809735	-0.0216564	0.000200486	-0.0125976	0.014848	0.00778141	0.00565271	-0.0289924	-0.00446909
TS4-D7	-0.00253337	0.0538431	-0.0286398	0.0633865	-0.00931978	0.0547524	-0.00421973	0.0140348	0.00146436	0.0461798	0.0227965	0.00453401	0.0105742	0.00655979	0.00796813	0.00355979	0.0344134	0.0278742	0.0207092	0.0034128	-0.0571862	-0.00778285	-0.0105503	0.0201043	-0.00321702	0.0300399	-0.00958717	0.00237537	0.0244531	0.00366468	-0.00243089	-0.0143533	0.0138216	-0.0027395	-0.0294418	-0.000155442	-0.026204	-0.00328892	-0.0283135	0.0154884	-0.0244923	-0.0132825	0.00323683	-0.000215811	0.0144407	-0.0219577	0.0130658	-0.0136814	-0.0036491
WC10-D5	0.00933987	0.0216595	0.0501679	0.0222527	-0.0282412	-0.00345274	0.00184898	-0.00966824	-0.0480768	-2.81407e-05	-0.0164096	0.0176045	-0.0151049	0.00152877	0.0203305	-0.0208555	-0.00428603	-0.0110686	-0.0176883	0.0269055	0.0272167	0.0420235	0.0315401	-0.0169049	-0.0416075	0.0334325	-0.00338319	0.0180485	-0.0145274	0.0246088	0.00160007	-0.0303962	0.0348896	-0.0140256	-0.000784038	0.0100523	0.0121009	0.0265685	-0.0215103	-0.020957	0.00744988	0.000382684	-0.00195325	0.00940294	0.0123291	0.0319243	0.0242204	-0.00435648	0.0155109
WT6-H8	0.0071075	0.0745059	0.0473957	-0.0329721	-0.0193569	-0.0110477	-0.0326282	-0.0237085	0.0160541	0.0668969	0.0625007	-0.00991	0.0208133	-0.00796117	0.039328	0.00054812	-0.00110492	-0.0144461	-0.0119753	-0.0123431	0.00802852	-0.0300168	-0.0174924	-0.0284409	0.0321484	-0.0107857	-0.00334952	-0.0117708	-0.0219538	-0.0245626	-0.00948947	-0.0206884	0.0140356	-0.00567155	0.0123265	-0.0414496	0.0126961	0.0243786	0.00192694	-0.040472	-0.0175888	-0.00890149	-0.00985484	0.0251743	-0.0115932	0.0169781	-0.0140527	-0.0175128	-0.00354152
WT8-H0	0.101603	-0.00515919	0.00528409	-0.0792704	-0.029385	-0.00319875	0.0653025	-0.0473723	-0.054338	0.05156	0.0215419	-0.0214454	-0.00598223	-0.00199804	0.00707029	0.00676225	0.0126429	-0.00367048	0.0132991	0.00199313	0.0149177	0.00965671	-0.0156102	-0.0366034	0.0109512	-0.00504731	0.00255068	0.00748195	0.00547316	-0.0155869	-0.0086351	0.0350473	-0.0511377	-0.0112425	-0.00713879	0.021925	-0.0010412	0.00997109	-0.0176727	-0.0094085	0.0286472	-0.00691331	-0.00998058	-0.0124863	-0.016959	0.0158417	-0.0070695	0.0226295	-0.0154461
TS6-H0	0.0669296	-0.0229419	0.0664813	0.0318826	0.0204847	-0.0742016	-0.0627887	0.00908953	-0.134666	0.0217345	-0.044743	-0.0538629	0.00956501	0.0473154	-0.0613347	-0.00686226	0.0613083	0.0574274	-0.000488416	-0.0275497	0.0389946	0.00530365	-0.0151656	0.00374819	0.0118561	-0.00335224	0.0074828	-0.00863495	-0.0432546	0.0247422	5.92405e-05	-0.00536126	0.0500726	-0.0151259	0.011974	-0.00547747	0.0039575	0.0115983	-0.010614	-0.0143338	-0.00268783	0.00182793	-0.0198917	-0.0289537	-0.0100531	-0.00294132	0.00814234	0.00622109	0.0160867
TS7-H8	-0.0999875	-0.0244633	-0.000691718	-0.00122116	0.0729064	0.00309898	0.0504051	0.0147337	-0.00102831	-0.0138962	-0.0213046	0.0795881	-0.00719929	0.00751268	0.00539685	0.0218127	0.0433566	-0.0467805	-0.020347	0.0259157	0.00034476	-0.0274061	0.0291758	-0.0435876	-0.000346051	-0.000655921	0.000971371	-0.00723957	-0.0291764	-0.0243898	-0.00770542	0.0104982	0.0124782	0.00391563	0.0110067	0.00628481	-0.0256542	0.0191007	0.00259267	-0.0165074	0.0130223	0.0105207	0.00716618	-0.00717727	-0.0304061	-0.00147672	-0.0104728	-0.000232768	0.0333294
CS3-H8	4.15444e-06	0.0656039	-0.0239543	0.0458065	0.0263688	0.0661211	-0.0218224	0.00901676	0.00839085	0.056887	0.0122576	0.0365989	-0.0264869	-0.0313263	0.0333687	-0.0854342	-0.0279819	0.0511216	-0.0169973	0.014357	-0.0125106	0.0198806	0.0171531	0.00231564	0.0123009	-0.0178569	-0.0179096	0.0107182	0.0508815	0.00752123	-0.000115255	0.0152135	0.0101126	-0.00484338	-0.0128114	0.0118784	-0.0127507	0.0096244	0.00879222	0.00126308	0.00864582	-0.0178168	-0.00158777	-0.00058745	-0.0111566	-0.0165901	-0.00334386	0.0261726	0.00537364
CS9-D5	0.0477644	-0.00197238	-0.0531286	-0.0769931	0.0127939	-0.0724894	0.0753883	-0.0292786	0.0409144	0.047532	0.0466773	0.00335113	-0.0221485	0.00707986	0.0046074	0.0145581	0.000852765	0.0150443	0.0726258	-0.0186172	-0.00214068	-0.0156164	-0.0326254	-0.010115	-0.0216255	-0.00197914	0.013573	0.00178821	0.0116336	0.0149984	0.00342392	-0.0115019	-0.00145794	0.00301909	-0.0220741	0.0203884	0.0159466	0.0291638	-0.0208866	-0.0168596	0.0244575	-0.0162945	0.0159426	0.00152482	0.0193363	-0.0161766	-0.00966358	-0.02432	0.0131235
TS4-H0	0.00719507	0.0490736	-0.0239725	0.0378801	0.0738644	0.00191221	0.0461182	0.0431981	0.0116609	0.00790492	0.0015916	0.0553763	-0.0460381	-0.0402324	0.0134532	0.000785177	0.00179876	-0.0455843	0.016042	0.0124088	0.0389407	0.022109	-0.0155924	-0.0381535	0.0199635	0.00211027	-0.00879633	-0.0127132	0.00857186	-0.016715	-0.0290656	-0.0026696	0.0252189	0.00576592	0.00749382	0.01022	-0.0169562	-0.0414155	-0.0086592	-0.00693631	-0.00343841	-0.00112914	0.0124857	0.0159061	0.0111443	0.0113191	-0.00551938	-0.00976277	-0.00268873
WC8-D5	0.000117083	0.0318489	0.0382779	-0.0083292	0.0372183	-0.00025017	0.00761851	-0.00989472	-0.0427138	0.0109034	-0.0128702	0.0227481	-0.00633245	-0.0172393	0.0022572	-0.0459725	-0.0639655	-0.0232154	-0.0341502	0.0177882	-0.0114203	0.0102043	-0.0243957	-0.0153711	0.00506122	0.0236977	-0.0228591	-0.00895671	0.0353506	-0.00838984	-0.00638294	-0.0211178	-0.00751696	0.0246296	-0.00358029	-0.02009	-0.0106133	-0.0176232	-0.0124047	0.0484739	-0.00290068	-0.0196213	0.0183679	0.0023361	0.0134379	0.0337894	0.00429698	0.0197399	0.0142652
TS9-H0	-0.0436333	0.0297344	-0.065015	0.0427086	0.0918704	-0.100503	-0.0939037	0.0185927	0.026569	-0.0107205	-0.0438649	-0.0189429	0.0242968	0.00963799	0.0131269	0.0500376	0.017435	-0.00949409	-0.014226	-0.0362508	-0.0230234	-0.0123876	-0.0327826	0.0362202	-0.00333687	-0.0491096	-0.00859823	0.00682924	0.037411	-0.00550927	0.0202064	0.0073946	-0.0303034	-0.0021523	0.0250046	0.0241196	-0.00486608	-0.0155456	-0.0110499	-0.00204066	0.00808762	-0.0300792	0.0266191	0.00416655	-5.42583e-05	0.00122612	-0.0119103	-0.0226193	-0.00766052
WC2-D3	-0.0169975	-0.390353	-0.0750273	-0.0822328	0.0884067	0.127844	-0.0246961	-0.039368	0.0684818	0.0547974	0.0533647	0.00176659	0.0390412	-0.0039376	-0.0104803	-0.0561918	0.00462652	0.0347826	-0.000915957	0.00221135	0.0325712	0.028567	-0.0242946	0.000644575	0.0423087	-0.0128128	0.0688529	-0.0344086	-0.00517078	0.0325994	-0.0352408	-0.00687118	-0.00390869	0.0495119	0.0211431	-0.00603481	0.00326114	-0.0101945	-0.011245	0.0151796	-0.00716535	-0.0162023	0.0125931	0.00680926	0.0234289	0.00142434	0.0119613	0.0119896	0.00441346
WC9-H8	0.0685912	0.0122479	-0.0730178	-0.0364102	-0.0310911	-0.0992886	-0.0895077	-0.0325842	-0.0175011	0.0372417	-0.0137249	-0.00971704	0.0286492	0.0107012	0.0572689	0.0203911	-0.00219484	-0.0328549	-0.0542092	0.00749014	-0.0430321	0.00187957	0.0255254	-0.0219924	-0.00937515	0.0547709	0.00534615	0.0282442	-0.00445954	0.0403897	-0.0449167	0.011333	0.00905455	0.0239061	-0.0062731	-0.0166465	0.0407511	-0.00541066	0.00365825	-8.3022e-05	0.00907697	-0.0190971	0.0127724	-0.00461477	0.0023575	-0.00891498	-0.0113181	0.00745478	0.0157287
WT9-H8	-0.0576499	0.0110632	0.067066	-0.0313566	-0.0244534	-0.0343939	-0.0250566	-0.052917	0.000196796	0.0464521	0.0897987	-0.0174301	0.0439479	0.000748744	0.0380822	0.0287955	-0.00626513	-0.00489747	-0.0186681	-0.042188	0.0165037	-0.000141335	0.0191213	-0.0165336	-0.040786	0.000449858	-0.0239195	0.0222088	-0.00780821	-0.0195341	-0.0536277	0.00137842	-0.0345605	-0.0316646	-0.00573407	0.00537578	0.0180136	-0.022278	-0.0309908	0.00113841	-0.000481059	-0.00654256	-0.0218347	0.0306363	0.0327609	0.000346689	-0.0167474	0.00679685	-0.0120514
TS3-H8	-0.00972785	-0.0851778	0.0549241	0.0800569	-0.00130308	-0.0403055	0.105742	-0.0588001	0.0392228	-0.0523677	0.0259237	0.00622197	0.0346765	-0.017342	0.010329	0.00207271	-0.0070096	-0.0233351	-0.0092894	0.0134621	0.0393552	0.0211101	0.0889177	0.0149842	0.00797915	0.0284881	0.0183463	0.0180768	0.0179512	0.0124154	0.00409927	-0.0145202	-0.0121631	-0.00792347	0.00841701	0.00440298	-0.0238622	0.0368917	-0.0184848	-0.00285949	0.0129432	-0.023017	-0.0139922	-0.00519227	-0.0179379	0.0152493	0.00191058	-0.0243283	-0.00360404
WT6-H0	0.0268279	0.00424218	-0.0120145	-0.121605	-0.0603088	-0.0258156	-0.000961201	-0.0138558	0.00181049	0.0563877	0.00501333	-0.0117543	0.041563	-0.00599059	-0.0293124	-0.0306243	-0.0415913	-0.0114201	0.042462	-0.0349022	-0.0223963	-0.0414635	-0.0112693	0.0223977	-0.00128893	0.00341885	-0.00420665	-0.0160793	-0.0166924	-0.00137235	-0.0195489	-0.0307906	-0.00699674	-0.0281099	-0.0561866	-0.0146691	0.00745594	-0.0330619	0.0348514	0.000534841	0.00766329	0.006375	0.0194899	-0.0195616	0.0040268	0.0193186	0.0205506	0.00694751	0.0206276
TS1-D5	0.0857356	-0.0123113	0.094738	0.0153888	-0.0160894	0.0156152	0.0174212	0.01907	-0.0143337	-0.0144942	-0.00700142	0.0222104	-0.00163455	-0.0189029	0.0345574	0.0742345	-0.00158995	0.0132334	-0.0158063	-0.0261808	-0.00721786	-0.0342138	0.0211275	-0.0108606	-0.0153893	0.0229365	0.0227133	-0.0189885	-0.0276551	-0.0301053	0.0131631	-0.0283163	-0.00202146	0.0149973	-0.0120202	-0.000199306	0.0194738	0.0054854	-0.00203134	0.00716096	0.00328794	-0.00386631	0.0285076	-0.0178865	-0.00878086	0.0127898	0.00837832	0.0119179	-0.0163509
WC8-H8	-0.0356459	0.0625208	0.00892331	-0.051593	0.0968969	-0.0533799	0.0317261	-0.0133262	6.65845e-05	0.0397823	0.0573045	0.000237807	0.0219505	-0.0106187	-0.0463769	0.00834007	-0.029017	-0.0140046	-0.00749024	0.0172433	-0.0151919	0.0369085	-0.00800775	-0.0196981	-0.0178314	0.0337696	0.000590677	-0.000899262	-0.0294506	-0.0076183	-0.0120212	-0.025211	0.0162926	0.026439	0.0148715	0.0083409	0.0250193	0.0193747	0.0308381	0.00871492	-0.0120754	0.00888884	-0.012231	-0.00667292	-0.00281921	0.0226133	-0.0167599	-0.0170849	-0.0135367
WC1-D3	-0.00836566	0.056601	0.0221359	-0.00519584	0.0280697	0.0383728	-0.00263325	-0.00445949	-0.0287099	0.00257776	-0.0305067	-0.0250751	0.0124548	-0.00599502	-0.00478218	0.00908847	-0.0317058	-0.00670414	0.0258563	-0.0183074	-0.046457	-0.012419	-0.0247402	0.0177263	-0.00835628	0.0221841	-0.0163256	-0.0363767	-0.0214214	0.00984925	0.000361586	-0.0314462	-0.0155293	0.0161715	-0.00561662	-0.000694403	0.00172899	-0.00741626	0.0147974	-0.00417151	0.00506629	-0.0172264	-0.000229676	-0.0212012	-0.0177387	0.0159883	0.00684225	0.0207194	-0.00462936
TS5-D3	-0.0225683	0.066008	-0.0250817	0.0567433	-0.0440882	0.0413891	0.0201269	0.0358912	0.00920363	-0.0794213	0.0269613	-0.0223109	0.0729386	0.0270603	0.00787315	-0.0035973	-0.00653632	-0.0231131	0.0189494	0.0351465	0.0220069	0.00455855	0.0271801	0.0213668	-0.0131568	-0.0059922	-0.00468466	-0.00783364	-0.0344468	0.0157808	0.00412344	-0.023654	-0.0129664	-0.0124588	-0.0139068	-0.013228	0.00802176	-0.010859	0.0232563	0.0102935	-0.0115109	0.021094	-0.0233588	0.00524199	-0.00565706	0.0030031	0.00986466	-0.0130004	-0.00955278
TS9-D5	-0.00278	0.00969998	-0.057311	-0.0511457	-0.0429711	0.00204318	0.0148533	0.00451906	-0.0521345	0.0200747	-0.0512572	-0.0020175	-0.0286289	-0.0181952	0.0136953	-0.0099657	-0.0298984	-0.00120112	-0.0168799	0.00352189	-0.0266071	0.00955309	0.0133585	0.00313983	-0.00115281	-0.010349	0.011737	0.00509916	-0.00233932	-0.0211562	-0.0210201	-0.0150153	0.0107128	0.00403774	0.0122884	-0.00261874	-0.0126155	0.0414118	0.00230625	0.0137932	0.0290653	-0.00405693	-0.0173045	-0.0307003	0.0275635	-0.043163	-0.0132366	0.00709663	-0.0133036
CS1-D5	0.0299677	0.0439711	0.025743	0.0349478	-0.00278344	0.0243494	0.0175004	0.0224198	-0.0265394	-0.0058789	-0.0438701	-0.00879727	0.00039961	0.017792	-0.00842132	-0.0158894	0.0112991	0.000290954	0.0268124	0.00577032	-0.0218183	-0.0499957	-0.00777439	-0.0154672	-0.0173949	-0.0157106	0.0292611	0.0303332	-0.0120606	-0.00432369	-0.0274484	0.0251157	-0.00321994	-0.00929452	0.0055731	0.00123367	-0.00197381	0.00889202	0.0101486	0.0266143	0.0263832	-0.00314967	-0.00571545	0.0165367	-0.00150022	0.0111761	0.0102424	-0.00159371	-0.001571
TS5-D5	0.060706	-0.0291762	0.0608842	-0.00192538	0.155953	0.0391801	0.0933585	-0.011498	0.0215984	0.0161616	-0.00956875	-0.034259	-0.000181449	0.0143266	-0.0163944	-0.0323198	0.0511701	-0.0375486	0.0391471	-0.00670181	0.0375336	0.0284147	-0.0603459	-0.00613696	-0.00033898	0.0297419	-0.0168526	0.00869887	-0.0223919	-0.00593964	0.00172761	-0.0290244	0.00228531	-0.0188122	-0.00141912	0.0245576	-0.010238	0.0152732	-0.00977617	-0.00049733	0.0123045	-0.00976031	-0.017253	-0.0300235	0.01396	-0.0133763	0.00324783	0.006562	-0.006004
TS7-H0	0.0998045	-0.001348	-0.0328081	-0.054588	-0.0405599	0.0567999	0.0288227	0.05985	-0.0172613	-0.0579751	-0.00619936	-0.014593	0.0337192	0.0218546	-0.0327383	-0.00625361	0.0235626	0.0156076	-0.00566197	-0.0383858	-0.0236507	0.0344984	0.0156917	-0.015103	0.0106642	-0.0197668	-0.0199632	0.00274608	0.00409553	-0.00163706	-0.0426285	0.0110223	0.00445535	-0.0141356	-0.0223742	-0.00812157	-0.0050591	-0.0118588	0.0158407	-0.0178879	-0.0407759	-0.0241072	0.0256247	-0.00166826	0.00156317	-0.0136991	4.81491e-05	0.00496713	0.00475596
WC6-H8	-0.0744406	0.0438537	0.0505065	-0.060327	0.0202151	0.00800764	-0.0908405	-0.0310653	0.0172315	-0.000772398	-0.0435843	0.0563713	0.0164255	-0.0283617	-0.00203393	-0.0181871	-0.00244206	-0.00743443	-0.0192301	0.000186589	0.00146199	0.0120369	-0.0247789	-0.00478339	-0.0185849	-0.0513084	0.0257516	0.00281209	-0.0129655	0.00394918	0.0165468	-0.0281487	0.0307438	0.00470854	-0.0117029	0.0234219	-0.0262208	0.00923777	0.0121256	-0.00432608	0.003376	-0.000968263	-0.0332935	0.0186412	-0.00615828	0.0134747	0.0155697	-0.00237564	0.0102647
TS10-D5	-0.104849	0.0233146	-0.050334	0.0794826	-0.0253827	-0.0363868	0.0637755	-0.00534972	-0.0230532	-0.0164506	0.0409547	-0.00460234	0.0848161	-0.0604091	0.00800951	-0.034652	-0.0190387	-0.0155646	0.00608783	-0.0429368	-0.0470987	0.000962226	0.03194	-0.0144899	0.021838	-0.019935	0.043748	-0.00619415	-0.00979258	0.012681	-0.00111047	-0.0177121	0.0247965	0.000505107	0.0392819	0.00566341	0.000259318	-0.0291672	-0.00718367	0.00424137	0.0147634	0.0117013	-0.00858888	-0.0265582	-0.00354131	0.00392478	-0.0294568	0.0107121	-0.00437074
CS4-H0	-0.0689894	0.041503	-0.0420682	0.0269742	-0.0395867	-0.0473697	0.100058	0.031218	-0.0314906	-0.0200696	0.0521409	0.0238957	0.0890882	0.0306297	-0.0275947	0.026602	-0.0669766	0.034493	0.00695113	0.00524854	0.0340649	-0.00913036	-0.01968	-0.0227327	-0.00755325	0.0104477	-0.0116855	-0.00667172	0.00152735	0.00844945	0.0390618	0.016053	0.00406156	0.00671895	-0.0504292	0.0114729	0.00371882	-0.0103453	0.00996954	0.00279644	-0.0074431	-0.0092049	-0.00576134	0.0169951	0.00860566	-0.038785	0.00507484	0.0134349	0.000803962
TS9-D7	0.0411661	0.00334399	0.0101681	0.10367	-0.0323109	0.0847701	-0.0229237	0.0470276	0.0511143	0.0444428	-0.0207113	-0.0600865	-0.0366754	0.00318976	-0.00468848	-0.0436259	0.00768973	-0.0231426	0.0330835	0.00909802	-0.00108318	-0.0407784	0.0213482	-0.000361176	0.0193582	0.0269077	0.00716261	0.0173046	0.00508388	-0.0263915	0.0442026	-0.0112943	0.0395826	0.0028567	-0.0216427	0.050414	0.0287262	0.0259716	-0.0112396	-0.0168999	-0.00544772	0.0421424	0.0219088	-0.0151436	0.0147907	0.00200003	-0.0150896	0.016044	0.0180984
WT2-D5	-0.0409791	0.0801506	-0.0103308	0.0397798	-0.0365816	-0.0155581	-0.058089	-0.0364305	0.039021	0.0190291	0.010825	0.0241123	-0.0365523	0.00786782	0.019325	-0.0545571	0.0219697	0.0381417	0.000316283	0.00306333	-0.0416941	0.0113746	0.00410452	0.0154478	-0.0533423	0.0205786	0.00807717	-0.0154353	-0.00938095	-0.00689432	-0.0177137	0.00317745	0.0073497	-0.00877798	0.0181599	-0.0282916	-0.0453853	-0.00881823	0.0232145	-0.00241946	-0.0182583	-0.0181548	0.00879154	0.0152393	0.0284237	0.027014	-0.00568373	0.00960931	-0.0267161
TS8-D5	-0.139671	-0.0617146	0.0010204	0.054547	-0.0292124	0.0854187	-0.0164287	0.0226452	0.0373447	0.0752023	-0.0453141	-0.0276017	-0.0470494	0.00827778	0.00456384	0.0026206	-0.030474	-0.0179153	-0.00244292	-0.017637	-0.0148148	0.0248527	-0.011921	0.0204748	0.0359299	-0.0277149	0.0215988	-0.00861097	-0.0132548	0.00172988	-0.00590578	0.0173345	-0.0108111	-0.0133937	0.0278292	-0.0361168	0.0157018	-0.00845745	0.018335	0.00623095	-0.0127407	0.00918186	-0.0275574	-0.00366065	-0.00691171	-0.0267382	-0.000642182	0.00295247	-0.0105907
WT2-H0	-0.0516499	-0.0330901	-0.0489621	-0.0859193	-0.0472753	-0.0108058	0.00674475	-0.0153571	-0.0781791	0.00319513	0.0107557	-0.0529502	-0.0168091	-0.0687299	-0.0391824	-0.0333856	0.0276876	0.0128604	0.00452199	0.00325497	0.00815293	-0.000989921	0.0139043	0.020668	0.019468	0.036138	-0.0364078	-0.014401	0.0352837	0.000946272	-0.00449919	-0.0273587	-0.0110408	0.0374554	0.0217289	-0.00550255	-0.006378	0.0217863	0.0338425	0.01853	-0.0128503	-0.024667	0.0190603	0.00726777	-0.0110678	0.00213693	-0.0342384	-0.0160017	0.00775751
WC1-H8	-0.0473069	-0.0353203	-0.0907255	-0.0609436	-0.0481475	0.160289	-0.0648014	-0.116937	-0.0129905	-0.014533	-0.00629366	0.00433416	0.100298	0.00221178	-0.0730226	0.0303407	-0.0325857	-0.020891	0.0228033	-0.0128585	-0.0390187	0.0110751	0.00182907	-0.0452535	-0.000324004	0.0131463	-0.0268872	-0.0199846	-0.00527456	0.00205817	0.00188433	0.0320324	-0.0133355	-0.00961486	0.0159207	-0.00330265	0.0095556	0.0063961	-0.0268277	0.00520477	0.0299581	-0.00235312	0.00653124	-0.016648	-0.00253139	-0.0200898	-0.0140704	-0.00437978	0.000554259
WC3-D5	-0.00899833	0.0168988	0.0605971	-0.00367854	0.010001	-0.0297669	-0.0254979	-0.0348534	0.0162312	0.00480594	0.0228472	0.00520262	0.00231231	0.00149333	-0.00723982	0.0159983	0.0348564	-0.0562948	-0.0454115	0.0119485	-0.04386	0.00141482	-0.00854086	0.0192926	-0.0210158	-0.020973	0.00333851	0.0122812	0.0203024	0.0182022	-0.0395826	-0.00730174	-0.0284611	-0.0244575	0.00485664	-0.00176927	-0.0123495	-0.00586709	-0.0247373	0.0145048	-0.00493701	-0.00929433	-0.0325922	0.0292747	-0.00355216	-0.00230287	0.0168891	-0.0053129	0.00909969
WT1-H0	0.0034319	-0.0283847	-0.120043	0.0027651	-0.0440027	-0.0419523	-0.0207892	-0.0808761	0.109289	0.0552248	-0.0125834	-0.0231034	0.0423745	0.0252356	-0.0232687	0.0562985	0.00706456	0.0534274	0.00552249	0.0281786	0.0628391	0.0289803	0.0443053	0.0119938	0.0251092	0.026343	-0.0271073	-0.00821435	0.0108225	0.0353831	0.00110224	-0.00792644	0.00736565	-0.011739	0.0160066	-0.0079373	-0.0220734	0.0166785	0.0270563	-0.0280259	-0.0270469	0.0183914	-0.00542839	-0.005788	0.0319036	0.0125729	-0.0118536	0.00150915	-0.0146108
WT3-D5	0.0320226	-0.101813	0.137252	0.00862784	-0.0542014	0.0089561	0.0419608	0.0399364	-0.0247576	0.0170807	-0.0243699	-0.000545926	0.0464941	-0.0447702	-0.00217078	0.0122702	0.0815919	-0.0106104	-0.0555913	0.0104813	-0.012693	0.0214981	0.00587102	-0.0144631	0.0304732	0.0346072	-0.0340295	-0.00675046	0.00829258	-0.0205052	0.00967191	-0.0258209	0.010954	-0.00452394	-0.0366322	0.0157545	-0.0104932	0.00989285	-0.00581823	-0.000440341	0.00879763	0.0176089	0.00907127	0.00715696	0.00548325	0.00531652	-0.00165556	-0.0113176	-0.0342572
WC7-H8	0.0915035	0.0349838	-0.0291457	-0.121125	-0.0431079	-0.00164793	-0.065422	-0.0161021	0.0231224	-0.0643565	0.0343495	-0.0586037	0.0155454	0.0154899	0.00143401	-0.0695049	-0.0200841	-0.00103599	-0.0479213	-0.0164859	0.0210511	-0.0179997	-0.0309177	0.00244456	-0.0192272	-0.00413658	0.0397053	0.0300612	0.062705	0.0115813	-0.0251029	-0.00259125	-0.00190581	-0.052821	0.0127653	-0.0155724	-0.0205743	0.0111277	0.0075199	-0.0206197	-0.000352534	0.0349858	0.00334071	-0.00660299	0.00314163	-0.00411479	-0.00951934	0.0189332	0.0182073
CS6-D5	-0.013637	0.0430797	-0.017413	0.0394301	-0.00740714	0.0353422	-0.0436208	0.0180029	-0.0107967	0.00550923	0.0219255	0.0672139	-0.0147273	-0.00475395	0.00685325	-0.0116839	-0.00860679	0.0162193	0.0341025	0.0396949	0.0260606	-0.0345004	0.018432	0.0191894	-0.0170091	0.0375576	0.0060219	-0.0171781	0.0115671	0.00561812	0.0215853	0.00567093	-0.0349209	0.00523557	0.00587281	-0.032517	-0.00166466	-0.00108874	-0.0155308	0.00393959	0.0155043	0.0366638	0.0255216	-0.00697659	0.0159765	0.00236417	0.00573049	0.0140884	0.00752221
WT11-D7	-0.0325852	-0.00784009	-0.0195565	-0.124367	-0.0897058	-0.0482533	-0.0231183	0.0278207	-0.0170147	-0.0295007	-0.00113331	-0.053664	-0.0123277	0.00218129	-0.0480327	0.000101384	-0.0496266	0.0254659	-0.0170815	-0.0217249	0.0137289	0.0523521	-0.0127179	0.00705053	0.0157845	-0.0282148	-0.0032285	-0.00610205	0.00112977	-0.0245603	0.0264532	0.0273408	0.0127745	-0.0183429	-0.0085392	0.0118702	0.0172004	0.00626494	0.0113588	0.00281579	-0.000322383	-0.00452559	0.00403817	-0.00711625	0.00735264	0.0118494	-0.0220159	-0.0187352	0.00287727
WC2-D5	-0.0209893	-0.0682921	0.0846866	0.0247087	-0.0536599	-0.00559657	0.0212408	0.00238719	-0.0259459	0.0222297	-0.0377026	0.0218885	-0.0259484	0.0269607	0.0108139	-0.00165118	0.00449115	0.0166446	0.00247238	-0.0106599	0.0429752	0.0303715	-0.026886	-0.0156971	-0.0422119	0.0202526	-0.0321058	-0.00418568	-0.0214295	0.0340509	-0.0212884	-0.00885812	-0.00541511	-0.011035	-0.00257008	-0.0181211	0.000254077	-0.0187643	-0.0114741	0.015183	-0.00354132	-0.0012768	0.0199652	0.0178018	0.00530561	-0.0402413	-0.034989	0.0140181	0.00556819
WC9-D7	-0.0433808	-0.0681655	0.110166	-0.0121194	-0.0662271	-0.0339372	-0.0352789	0.0405734	0.0284298	-0.0428203	-0.0650456	0.00913459	0.0203197	-0.011054	-0.0327217	-0.0384123	0.00389156	0.0382798	0.0263333	-0.0113652	-0.0288379	-0.0160668	-0.0346404	0.00709773	-0.0142651	0.0169171	0.011694	-0.00378964	-0.0229101	0.00665854	-0.0242366	-0.000572291	0.00700802	0.0152002	-0.00801551	-0.0124034	0.00782981	0.0204067	-0.0129466	-0.0146343	0.0379892	-0.0262279	-0.0296589	0.00287871	-0.0222802	0.0311647	-0.00777494	0.00430938	-0.0283196
WT10-D5	-0.0495724	-0.0539456	-0.0284574	-0.0798533	-0.0663368	-0.0472519	-0.0209384	-0.0230095	0.0601767	-0.00837839	-0.031734	-0.016417	-0.0423519	0.0218227	0.0213604	-0.00609137	-0.0089669	-0.0131027	0.0112681	0.0249942	-0.0160209	-0.0247009	0.0235329	-0.0586316	-0.0169944	-0.0240978	0.0165632	-0.0558477	-0.0133686	-0.00942872	-0.0250175	-0.0254645	-0.00695267	0.018234	-0.0332836	0.0189995	-0.0167904	0.0142481	-0.0128806	0.000448452	-0.0412317	-0.000618814	0.0217705	-0.0101574	-0.0190284	-0.00230874	-0.0134614	0.000322242	-0.00262553
TS7-D7	0.14257	-0.191806	-0.11947	0.051411	0.0320527	-0.0365406	-0.0643958	0.0540639	-0.0250725	0.0709377	0.0708926	0.0230677	-0.00714292	0.00657799	-0.066723	0.018979	-0.0014074	-0.0812963	0.0386959	-0.00938204	-0.0125139	-0.0157574	-0.0015617	0.00776275	-0.00784858	0.0568564	0.0452839	-0.0262377	0.0142652	0.0142485	0.0147087	5.21339e-05	-0.00765076	-0.018094	-0.00406191	-0.0242113	-0.0187773	-0.0105456	0.00673945	0.0210894	0.0192429	0.00643108	-0.00951084	0.0168612	3.37962e-05	-0.0106912	0.00633459	-0.00441358	-0.00234674
WC10-D7	-0.0516177	0.0472702	0.00841347	0.0147446	-0.0107614	-0.00166649	-0.0167405	0.0273998	-0.0348922	-0.0152884	-0.0521039	-0.0300737	-0.0227589	-0.0180097	-0.00932266	-0.00463796	-0.00179957	0.0109877	-0.021103	0.0414457	0.0161093	-0.0212395	-0.000120108	-0.00768626	-0.0192029	-0.00301628	-0.0300318	-0.0129301	-0.00695958	-0.0251801	-0.00424799	-0.0175908	-0.0106536	0.00519954	0.0127629	0.0051097	0.00203197	0.00514756	-0.00429736	0.0126936	-0.0235927	-0.014564	0.014094	-0.0150129	0.0199793	0.00574861	0.0395883	-0.00448986	0.00529319
WC3-H8	-0.0256108	-0.0143353	-0.0154066	-0.120424	-0.057244	-0.0351488	-0.0204443	0.00112257	0.038315	-0.00127524	-0.0700962	0.0230759	-0.00584919	-0.016509	0.0210019	0.00165788	0.0239358	-0.0692561	0.00238188	6.65609e-05	0.00666787	-0.040661	-0.00378224	0.0198616	0.0331656	0.0331704	0.0116535	-0.00324082	-0.0244041	0.00739284	-0.0184195	0.00890223	-0.00573253	-0.0287318	0.0257749	-0.00393328	0.00345291	-0.0208749	-0.00659959	0.00541848	0.000415882	0.00850474	0.00278241	-0.0255885	-0.000828618	0.0301889	-0.00287902	-0.00882746	0.0225612
TS7-D3	-0.117633	0.0171775	-0.0717175	0.109485	-0.0209746	0.0312243	0.0191927	0.000451762	0.0483756	-0.019748	-0.0297343	-0.0193843	0.0472554	0.0217961	-0.0519113	-0.0149736	0.00885887	0.0218642	0.00595657	0.055964	0.0404299	-0.031098	0.0159032	-0.0128088	-0.0224469	-0.0311683	-0.0257239	0.0049573	0.0269313	-0.0136414	0.0203916	0.0154959	0.0182974	-0.03724	0.0223415	0.0217857	0.00477807	-0.0375746	0.0187473	0.00791536	0.0206297	-0.0118137	0.0147567	-0.0301443	0.00221134	0.0137791	0.00138048	-0.0192016	0.00156321
TS10-D7	-0.0262629	-0.065619	-0.0631373	-0.0120641	-0.0349706	0.0048293	-0.0325656	0.00819303	0.0083563	-0.0266262	-0.0160489	-0.0755054	-0.0747299	-0.0583834	-0.00800083	0.0252495	-0.020593	-0.0803638	-0.0261029	0.0277311	-0.0249934	0.0109798	0.0285094	-0.0335616	0.01769	0.0106189	-0.0219167	-0.0241358	0.0320678	0.0210524	0.0346305	-0.0044406	0.0270851	-0.00546152	-0.00121351	-0.0243143	0.00379895	0.0135201	-0.0177768	0.00297964	0.000533268	-0.0177097	-0.0128366	-0.00623071	0.00809578	-0.0216162	0.0244802	0.0183513	0.0166852
WT10-H0	-0.067132	-0.105332	0.0990074	-0.000418011	-0.0176773	0.015165	0.0126391	-0.0303477	-0.0707756	0.0134815	0.04584	-0.0314534	0.0083688	0.0432733	-0.0461853	0.0188847	-0.0111834	0.0126899	0.0265616	-0.00174197	-0.0276238	-0.0334737	-0.000110033	0.00367426	0.00776093	0.0582254	0.0149684	0.021284	-0.00299367	-0.0531428	-0.00800908	0.0058469	0.0297428	0.0147874	-0.00432765	-0.00198202	-0.0748856	0.00667588	-0.00710966	-0.0249864	0.00210902	0.00899012	-0.00436611	0.0444956	-0.0101492	-0.0054067	-0.00936071	0.011463	0.0110709
WC10-D3	-0.0466506	0.0362561	0.00180806	0.0397685	-0.00361942	-0.00813095	0.000441375	0.0215497	-0.0293278	-0.0255007	-0.0330379	-0.0389401	-0.0429718	-0.0116774	-0.00815933	-0.0100929	0.0230007	-0.0021969	0.0136311	0.00598357	0.00908309	0.0122572	-0.00159849	0.000681272	-0.0164588	0.00528753	0.00800924	-0.0155493	0.0246739	-0.00291323	-0.0260426	-0.0181881	-0.000851424	0.0220652	0.00461228	0.00202543	0.010411	-0.0046855	0.0150815	0.0194566	0.018663	0.000962963	-0.0367051	-0.00266205	0.00597041	-0.00242584	8.36746e-05	-0.0123735	0.0096564
CS7-D7	-0.0114298	-0.00285305	0.0453215	-0.000107956	0.0147748	-0.0955765	0.0669994	0.00901507	0.0500551	0.0704368	0.0603485	-0.0183525	-0.00701541	-0.0147314	-0.0067776	0.0502253	-0.000525834	-0.0162451	-0.0229978	0.0302435	0.00303773	0.00750176	0.0170113	0.0314146	-0.0347824	-0.022424	0.0248813	0.00960379	-0.0164881	-0.0241781	0.00944985	0.0013578	-0.00273488	0.0304192	-0.00846995	-0.0233629	-0.00414379	-0.0105655	0.000225964	0.0107099	0.0180967	-0.0132977	-0.00552466	-0.00654627	0.00217382	0.0154464	-0.00360329	0.00646873	-0.00480355
WT8-D5	-0.0455219	-0.0406446	0.0949902	-0.027571	-0.0202114	-0.0266254	-0.0300326	0.00167751	0.00984836	-0.0226753	-0.0267936	0.0104273	0.0569157	0.0406751	-0.0624246	-0.0359668	0.000455554	-0.0257745	0.0234021	0.0195058	-0.0279707	0.0113164	0.00991126	0.0568131	-0.00295313	0.000887583	0.0154066	0.0201995	-0.0570764	0.00108278	0.0126495	0.00850085	-0.00937383	0.0180523	0.0333857	-0.0253732	-0.00851064	0.013065	-0.0330526	-0.0257942	-0.0287543	-0.0132224	0.0422884	0.00995211	0.0151457	0.00280415	0.0133977	-0.00739308	-0.0128898
WT2-D7	0.0140328	0.0456192	0.0482038	-0.00291234	0.00944699	-0.0918843	0.0101702	0.026911	0.00459807	-0.000964056	0.0596627	-0.0387104	-0.0419215	-0.0179457	-0.0337496	-0.00525588	0.0141419	0.025415	0.00466379	-0.0217641	-0.0341057	0.000950496	0.0391248	-0.0131805	0.0150044	0.00720693	6.75288e-07	-0.020709	-0.000933804	0.0230135	0.0069394	-0.0218977	-0.0128986	-0.0216555	-0.0345959	-0.0137578	-0.00850155	-0.00782422	0.00176088	0.017818	0.00306587	0.00284985	0.0154137	-0.00447337	-0.0100771	-0.00465255	0.0254599	-0.00636831	-0.00503792
WT3-H0	-0.104999	0.0296351	0.0209412	-0.0523122	-0.0141032	-0.0491181	-0.0585371	0.058419	0.0126035	-0.0602337	0.0812459	-0.00660196	0.00395085	0.0348646	0.0147598	-0.0308717	0.0685113	-0.0523779	-0.00891804	0.0222126	0.0618065	-0.013986	-0.0475867	-0.00754688	0.0468946	0.0159785	-0.0336864	-0.00146897	0.0174771	0.0145919	-0.0274917	-0.0122833	0.0150499	0.0170515	0.0136519	-0.0353257	0.00551511	0.00466997	0.0195738	0.00406394	0.00647778	0.0257062	0.0367526	0.00184423	-0.0243537	-0.00104887	0.0178832	0.0120322	-0.00235171
WC3-D3	-0.0120801	0.00318138	0.0451302	0.00440963	-0.0268424	0.00219465	0.0140832	-0.00188948	-0.0459157	0.00353129	-0.024366	-0.00805352	0.00778251	-0.0130328	-0.00862008	0.0274867	0.0375174	-0.00359089	-0.00605724	0.0371253	-0.0369287	0.0436999	-0.0505368	-0.00474394	0.00996362	-0.0114942	-0.0107753	0.00975554	-0.00969674	-0.0309899	0.0199524	-0.00952941	-0.0186357	-0.0246587	0.000360184	-0.021428	-0.026846	0.000438821	-0.0303021	-0.000599951	0.0170096	0.0190299	0.0212294	0.0136036	0.00159382	-0.000372156	-0.000324365	-0.0155596	0.0113396
WC5-D5	-0.0551978	0.047371	0.0120894	-0.00919105	0.0162821	-0.0384733	-0.0475904	-0.0419583	0.0237456	-0.0282658	0.000540786	-0.067638	-0.0100611	0.00461058	-0.0177741	-0.00758563	0.0348487	0.01922	0.0129889	0.0196912	-0.0281681	-0.00414699	-0.0281928	0.0136036	-0.0128654	-0.00300772	0.0174211	0.0215965	0.041112	0.0221329	0.0411918	-0.0198083	-0.0190534	-0.0167865	-0.00527515	-0.00262745	-0.00946934	0.0131348	0.0049943	-0.0113292	-0.00734754	-0.00117632	0.0200214	-0.0134523	-0.0217741	-0.0147057	0.0112869	0.0181487	-0.0143991
WT8-D3	-0.113221	-0.018237	-0.0192544	0.0385037	0.0316417	-0.00832322	0.00627832	0.0293979	0.00765827	-0.033217	0.00544113	-0.0518451	-0.00571408	-0.0636863	-0.00052081	0.046928	0.00770622	0.032971	-0.0341298	0.0255754	0.00714354	-0.0210172	-0.0283254	0.0267786	0.000987817	0.0115512	-0.00554328	-0.00093301	-0.00566796	0.0184321	0.00212995	-0.0240041	0.042313	-0.00144062	-0.0386345	0.0105636	-0.00552075	-0.0284686	0.0116112	0.00789143	-0.0133793	0.00130484	-0.0150427	-0.00634176	0.00450168	0.0140703	-0.000101888	0.0260663	-0.00345046
WC12-D7	-0.0659701	-0.0347807	0.0618744	-0.00603993	-0.000226679	0.0430892	-0.0375968	-0.0192839	-0.025426	-0.0318936	0.0225726	0.0306903	0.0150769	-0.0267844	0.0204686	0.0348179	-0.0110723	-0.0139593	-0.0141859	0.0718583	0.0151497	-0.0105128	-0.0348308	0.00237541	0.00102251	-0.0222789	0.0105434	-0.0151219	0.0220843	-0.0456282	-0.0135288	0.0154908	-0.00551264	-0.00629948	-0.0363238	-0.0320395	0.0193198	-0.00402536	0.00268315	-0.0331927	0.0177199	-0.0225582	0.00714314	-0.0314825	-0.00828768	0.0099783	0.00984233	-0.0173915	0.0118721
WC8-D7	-0.0184157	0.0282461	0.0400302	0.0149013	-0.0411707	-0.0351852	-0.0335878	0.017111	0.031212	-0.0231319	-0.0317759	0.00505909	-0.0242298	-0.0193194	-0.0110688	-0.0137177	0.00563079	0.0404325	0.0110418	-0.0239833	-0.00795249	0.0295419	0.00265653	-0.0139084	-0.0309361	0.011866	0.0208588	0.0108048	0.0217648	-0.0107911	-0.0375752	-0.0109265	0.0309011	-0.0293388	-0.0156952	-0.0239802	0.0103434	-0.0143217	-0.0110262	-0.0114022	0.026483	-0.0343252	0.00437062	0.0177457	-0.0168392	-0.0148017	-0.0175315	-0.0139153	0.00555558
WC7-D5	-0.00442155	0.0411198	0.0587368	0.0110752	-0.0415276	-0.0513725	0.00666585	-0.0455719	0.019912	-0.00644271	-0.0393883	0.0504893	0.0261059	0.0494547	-0.0724519	0.00992208	-0.0398546	-0.0282053	-0.00979858	-0.0112916	-0.00162072	0.011614	-0.00180777	-0.0419364	0.0324386	-0.00484805	0.00704562	0.0424178	0.0213923	0.0194458	-0.000305362	-0.00350288	-0.00990904	0.00343871	-0.0210764	0.0036707	-0.0177983	0.00848178	0.0133756	0.0439794	0.0117321	0.0085573	0.00580674	-0.0204983	0.0102565	-0.020915	0.0184902	-0.0100607	0.0193362
WT7-D7	-0.0623007	-0.0246683	0.0843493	-0.0492204	-0.00845008	-0.0147176	-0.00803092	-0.0233732	0.0397291	0.0572618	-0.0281061	-0.000517397	-0.0229578	0.045762	0.0142924	0.0125913	-0.0805352	-0.00632215	-0.0252218	-0.0279663	-0.0167807	0.0318849	-0.00861061	0.0193405	0.0158961	0.034785	-0.0350048	-0.00594944	-0.0176172	0.0170345	-0.00129147	0.0216398	0.00115559	-0.0222477	-0.010677	0.00395126	-0.020443	0.017022	-0.0200631	-0.00812368	0.00666998	-0.0144015	0.011889	-0.0234009	-0.0123301	0.00659294	-0.00106149	-0.00792564	0.00631063
TS1-D3	-0.102684	-0.0525807	-0.111196	-0.0395798	-0.12801	0.061149	-0.000465429	0.0553078	-0.0318881	0.0280887	0.0497185	-0.016846	-0.00339601	0.0220333	-0.0285091	-0.0146365	0.0437821	-0.00571595	0.00790352	-0.00391046	-0.0245407	0.040479	-0.00559442	0.00548185	-0.000476776	-0.0116525	0.00674833	-0.0335593	0.000194032	-0.037373	0.0119502	-0.00656016	0.0242793	-0.00755395	-0.00163468	-0.00389289	0.0390901	-0.0213417	-0.00470816	0.014603	-0.00377364	0.0114806	-0.0103116	0.0210282	-0.019597	-0.00824403	0.00656429	-0.0175957	-0.00949927
WT10-D7	-0.0376989	-0.11372	-0.0247001	-0.101519	0.0125392	0.0671098	0.0531461	-0.146688	-0.00533265	-0.0437652	-0.0553513	-0.0482252	-0.0719819	0.0298269	0.0629647	-0.0362826	0.0412242	0.0553666	0.0173836	-0.0293282	-0.0325484	-0.0024314	0.0622409	-0.0288041	-0.0321254	0.00927465	-0.0294979	0.013982	-0.0318519	-0.014166	0.0285914	0.0273239	-0.00829879	0.0159756	0.00504843	-0.00408168	-0.0254097	-0.0432716	0.0305956	0.0105303	0.0177642	0.0269168	0.0200379	0.0124978	0.00361676	-0.00622343	0.0186067	-0.0181386	-0.00883437
TS6-D5	-0.159776	-0.00133223	-0.0349998	0.0652456	-0.0603431	0.0369363	-0.0491832	0.0461883	-0.0403889	0.0312353	0.0520489	-0.036945	-0.0459056	-0.00694059	-0.0400291	-0.0270965	0.00870241	0.0228296	0.0181509	-0.0281282	-0.0238129	0.00312304	0.021114	0.00839482	0.0123262	-0.00594377	-0.0183016	-0.010717	-0.0142796	0.0201127	-0.015082	-0.00685822	-0.027237	-0.0125461	0.010461	0.0235512	0.00492293	0.020444	-0.0159373	-0.00982041	0.0140207	-0.00189108	0.0172261	-0.00613739	-0.00620911	0.0179436	0.00309403	-0.01517	0.00934602
WC6-D5	-0.0543594	-0.055899	0.069875	-0.0187114	0.0147331	-0.0449993	-0.0141688	-0.0217039	0.044424	-0.049047	0.00210144	0.0291145	-0.0353606	0.0487453	0.00288173	0.0300106	-0.0372617	0.0268502	0.0250819	0.00299429	0.00421062	0.0047832	0.00754881	-0.0548706	-0.00419881	0.0371743	0.0111988	-0.00403446	0.0103336	-0.0134964	-0.0243081	0.0237141	-0.0232637	-0.0139562	0.0142105	0.00185042	0.0265927	0.0181684	0.0193114	0.00330107	-0.0201841	0.0264097	-0.0114187	-0.0226128	0.0043118	-0.0073593	0.0173731	0.0249099	-0.00807172
TS2-D3	-0.164561	-0.0146501	-0.0762981	0.0651687	0.0363839	0.0629682	-0.0269295	0.0286437	0.0266832	0.00611334	0.00880368	0.00249279	0.000875618	-0.0359703	-0.0147287	0.0335241	-0.0242517	0.00945957	0.0165729	-0.0538923	-0.0111141	0.00366206	-0.00207378	-0.0430194	-0.0494159	0.0320654	0.00751193	-0.0140846	0.0320241	-0.0119362	0.00979724	-0.00327511	0.026794	0.0139472	0.0165024	-0.0122895	0.0212738	0.0345941	-0.0409232	0.0158022	-0.0189042	-0.00379328	0.00860551	-0.01295	0.0164406	0.00300427	0.0114281	0.000895353	-0.0119031
WC6-D7	-0.0378603	0.0553665	0.00735992	0.0226655	-0.0520594	-0.025449	-0.0516322	0.00436488	0.0201031	0.0760718	0.0126987	0.0371964	0.00324146	0.00857996	-0.0504177	-0.0130296	0.0061061	-0.0292653	-0.00766659	-0.0104231	-0.0084989	0.0145737	0.00149914	-0.0236564	-0.0353192	-0.0158944	0.00683026	0.0337211	0.0183083	0.00328108	0.0257991	0.0259302	0.0286765	0.00932639	-0.00719879	0.0385255	0.0120256	-0.0161815	-0.00638448	0.0155717	-0.0333213	0.000743789	0.0158874	0.00639801	-0.00393378	0.00102084	0.00217826	0.0114694	-0.00956676
WT6-D3	-0.101516	-0.116878	-0.0303639	0.0644198	0.0626298	-0.097348	0.0067805	0.00354781	-0.0655573	-0.0148711	-0.0507864	-0.00454814	0.0190976	0.0371393	0.0475599	0.0468067	-0.0508281	0.0300098	-0.0107797	-0.0107596	-0.0564618	0.0509922	0.00232109	0.0115075	0.0206199	-0.0116355	0.0283695	0.0414916	0.0129825	0.0114981	0.0252024	-0.0236694	-0.00989389	0.0230966	-0.00584912	-0.0122797	-0.0071803	-0.00709394	-0.00976644	-0.0166022	-0.00437453	0.0229815	0.0118007	-0.0199953	-0.00553628	0.0219801	0.00220922	0.00261284	-0.0145012
TS8-D7	-0.0757361	0.0212745	0.0273816	-0.0179508	-0.0174256	0.0296157	-0.0563279	0.00389708	-0.0469301	-0.037996	-0.0285691	0.0328319	0.00724882	-0.062468	0.0288877	0.025223	-3.39257e-05	0.00932744	-0.050067	-0.0166012	0.0137845	-0.0296185	0.00568318	-0.00211477	0.0172157	0.00524875	8.13382e-05	0.0307094	-0.0174155	-0.000168944	0.0258295	-0.00664607	0.0171621	0.0155903	-0.00594397	-0.0259716	0.00787845	-0.0409325	-0.0273588	-0.0172462	0.0163915	0.0371056	-0.0356774	0.0092245	0.0316395	-0.0163553	0.0023137	-0.0120376	-0.00465043
TS10-D3	-0.114833	0.00868034	-0.015776	0.00823946	0.0456184	0.00894798	0.0539304	0.0171155	-0.0252282	0.0146737	-0.0401259	0.00399251	0.0171971	0.0324627	-0.0459989	-0.0309046	0.0185214	0.00315598	-0.0400867	0.0255992	-0.0262447	-0.0133274	0.010538	0.00951032	-0.00743839	-0.00696981	-0.0146086	-0.00133515	0.0206598	-0.0178368	-0.000230397	0.00620748	-0.00365913	-0.00184128	0.012145	-0.0222957	0.00534574	-0.0202342	-0.0479415	-0.00564273	0.0307766	0.0329322	0.00827473	-0.00295717	0.00527269	-0.000339779	-0.0146349	0.000146463	-0.00208243
WT1-D7	-0.0712334	-0.106212	0.104527	0.0202451	-0.00682412	-0.0150691	-0.0271017	0.0051428	0.088794	-0.0406242	-0.0127196	-0.0502138	-0.0689458	0.0639523	-0.039256	-0.0266704	-0.0188909	-0.0286256	0.018441	-0.028763	-0.0304711	-0.0320488	0.04949	0.0163691	0.0376827	-0.0498168	-0.0229633	0.00904289	0.000553101	-0.0397582	-0.00627495	-0.0294913	-0.0148176	0.00610912	0.00709278	0.014571	-0.00252755	-0.0190864	0.0262444	-0.0185947	-0.00523972	0.00209622	-0.0212064	0.0109468	0.00556681	0.00451148	-0.00558604	-0.00320989	0.0195718
WT7-D3	-0.142218	0.0534487	0.00844418	-0.0832488	0.122162	-0.0359373	0.00150393	-0.023973	0.0454641	-0.0176304	-0.0262688	-0.0191266	0.0245103	-0.00301305	-0.0237685	0.00787541	0.00491131	0.0430817	-0.0569715	0.00511596	-0.000169173	-0.0252513	0.00877431	-0.0120209	-0.00584883	-0.00187564	-0.0187807	-0.0253086	-0.0373231	-0.00855977	0.00798689	-0.00957043	-0.00751334	0.021841	0.000329227	0.020394	0.00516186	0.0150456	0.0115039	0.00676835	0.0209701	-0.00429224	-0.0252883	0.00934116	0.0139238	-0.0144737	-0.00147176	0.00672966	0.013765
WT9-D3	-0.0673459	0.0221224	0.0454733	-0.0345131	-0.00489655	-0.0517782	-0.0152667	-0.0259532	-0.0158895	0.0150741	0.0591834	-0.00113597	-0.0211335	0.0148232	0.0291333	0.0101903	0.000203245	-0.00925226	0.043393	0.030604	-0.00237812	0.0258087	0.00772258	0.0199663	-0.0496727	0.000375342	-0.00493518	-0.00630336	0.0226846	-0.0306442	0.011241	-0.0293641	0.00953409	-0.00799123	0.0262809	0.0181901	0.0178873	-0.0163424	-0.0183703	0.00213899	-0.00433932	-0.0120188	-0.031222	-0.0119533	0.00400265	-0.0133033	-0.00315882	0.0158094	-0.0125513
TS10-H0	-0.0830429	-0.0557158	-0.092563	-0.065596	-0.0881609	0.0939518	-0.0205566	0.0565089	0.0041155	-0.0584961	0.0508857	0.0608056	-0.027881	0.05485	0.0453123	0.0565258	0.0252285	0.0269387	0.0150467	0.026798	-0.00824742	0.00186498	-0.0062758	0.00107574	0.0110662	-0.0155859	0.0123985	0.0439984	-0.00596478	0.0200202	-0.00496928	0.00155331	-0.00607381	-0.000428634	-0.0241153	0.0406526	-0.00928142	-0.00846329	0.00941779	0.00875637	-0.0020317	-0.0260086	-0.0054391	-0.00243634	0.0111619	0.0271997	-0.0166348	0.0116234	-0.00163318
TS5-H0	-0.0952063	-0.0371738	0.0389732	0.0498423	-0.101498	0.0110626	0.0371428	-0.0237266	0.00573324	-0.0193809	-0.0669458	-0.0137596	0.0614387	0.00360072	0.0323577	0.0292555	-0.0818098	0.00790515	0.00980027	0.0240244	0.0323429	-0.0242715	-0.00198846	0.0222863	0.0344439	0.00581781	0.0364578	0.00207989	-0.0361774	-0.0358395	-0.0146271	6.4404e-05	-0.00827824	0.0163477	0.00715	0.00260359	0.00658827	-2.15012e-05	0.00656819	0.0104414	0.00335618	-0.0188891	0.020895	0.00137253	-0.0288853	-0.0196254	0.00630189	0.0059465	0.00792317
WC1-D5	-0.0560163	0.0108637	0.0447938	-0.0390322	0.0364782	-0.0371316	-0.0154829	0.0229474	0.0250882	-0.0106461	-0.0395757	0.0235047	-0.00375685	-0.0330427	-0.0338619	0.0136074	-0.0234436	0.00384322	0.0386409	-0.0183847	0.00279361	0.047783	-0.0105037	0.0137329	-0.0205638	0.00535512	0.00435945	-0.0389642	-0.024532	-0.00138673	0.0225114	0.0267937	-0.0444361	-0.0225102	-0.0241073	-0.0159837	-0.0097936	-0.0141789	0.0118062	0.0225945	-0.00704318	0.0172476	-0.000258511	0.0265708	0.0155052	-0.0232237	-0.0174858	-0.00424893	0.00519778
WT9-D5	-0.12692	0.0342803	0.0287425	-0.0658776	0.0454959	-0.0360854	-0.0137303	-0.020378	0.0229738	-0.0274339	-0.0501763	0.0148204	0.00418978	0.0111643	-0.00016972	-0.0432016	0.0185072	-0.0157978	0.00723429	0.00641808	-0.000562549	0.021888	0.0180623	-0.014485	0.0221574	0.0365202	0.0305326	0.00723526	0.0369564	0.00130684	0.0173021	0.00646676	-0.0100624	-0.0106483	0.00685588	-0.0152471	0.0291753	-0.0128376	0.0146285	-0.0193547	0.00579547	-0.0262427	0.000947472	0.0152154	0.0088931	0.00933573	-0.0050601	0.00644744	-0.0286571
WT1-D5	-0.103898	-0.00564978	0.0180364	0.0149501	-0.0270532	-0.0507873	0.0228653	0.012531	-0.0614648	-0.0216475	-0.000956758	-0.01977	-0.0152047	-0.0042078	-0.0285177	-0.0360196	0.00443234	0.0130319	0.0172699	0.0160558	-0.00349343	-0.0179595	0.0327645	-0.0209402	0.0103872	-0.0285068	0.0318812	0.0226655	-0.0113022	0.0148542	0.0215144	0.0100424	-0.0360763	-0.00273058	-0.0115448	0.0126582	-0.0178978	0.00508163	-0.0136973	-0.00937555	-0.00584165	0.0076792	-0.00158247	0.0317255	-0.000134259	0.0158487	-0.00200763	0.0256967	-6.14676e-05
WT4-D5	-0.0491227	-0.176065	0.0812517	0.0443869	0.0336886	-0.00317485	0.0883207	0.0336822	0.039077	-0.0150028	-0.0419442	-0.0375082	0.0419319	0.0216666	0.0119803	-0.0133966	0.0124532	-0.0139715	-0.0191339	0.0240931	-0.045839	-0.048481	-0.0399898	-0.0147876	-0.0225582	0.019658	-0.0259589	-0.00717985	0.0170642	0.0139067	0.0192324	0.00504002	0.00929849	-0.014009	0.0106561	0.0089711	0.0159685	-0.0389352	0.0279707	-0.00601973	0.00776643	0.00970093	-0.0118274	0.00290522	0.0188618	0.00474358	-0.0224436	0.0170764	-0.00115317
WT6-D5	-0.142371	0.00584433	-0.0139323	0.123321	-0.113571	-0.0501552	0.0323286	-0.122328	-0.0285735	-0.104006	-0.0112317	-0.0073495	-0.0457287	-0.023139	0.0294695	-0.0398963	0.00806145	-0.0331989	-0.0158822	-0.00437997	-0.00548356	0.0157459	-0.0373516	0.0533518	0.0413352	0.0251779	0.0107001	-0.0256718	0.0206641	0.0216417	-0.00554712	0.0380665	0.0124571	0.0181585	-0.000904697	-0.0103756	0.0209902	-0.00940744	0.00201568	0.0125097	-0.0244291	0.000995785	-0.00442276	-0.00557295	0.00653698	-0.00690867	-0.00178572	0.00284578	-0.0158065
TS2-H8	-0.035565	-0.169224	-0.0163102	0.1052	0.0177502	-0.124304	-0.00609522	0.0502694	-0.0389359	0.0552767	-6.74035e-05	0.0150618	0.0414249	-0.00349749	0.0426707	-0.0712172	-0.00375236	-0.0194298	-0.00463622	-0.0646466	0.0376414	-0.0178033	-0.0316866	-0.0385194	0.0184349	-0.0345535	-0.0115162	0.0504398	-0.0161631	0.00910717	0.0179417	-0.00561844	-0.00721772	-0.0370251	-0.00609187	-0.0200676	-0.00602519	0.00463441	0.0121989	0.0157239	-0.00487487	-0.0155911	-0.00866347	0.00992031	0.00476117	0.015949	0.00704792	-0.00877999	0.0119676
TS8-D3	0.0525031	-0.260029	-0.0720724	0.0334505	-0.0246046	-0.0873907	0.0299838	0.0576321	0.000417648	0.0271128	-0.0582027	0.00939952	-0.000727576	0.0560074	0.0229488	0.00133326	0.00967559	0.0113201	-0.0324582	0.00927954	-0.0130083	-0.00644298	0.0316898	-0.00448235	-0.0113556	-4.83377e-06	-0.0519868	0.00704811	0.0351468	0.00769288	0.000751184	0.00169181	0.00928665	-0.0199823	-0.0134533	0.00709299	0.0444511	0.0135712	0.00232349	-0.016844	0.00950732	0.00190227	-0.00328744	-0.00148732	-0.0085263	-0.0135098	-0.0138939	0.00455524	0.00672274
WT6-D7	-0.153019	-0.0735782	0.00568206	-0.00892699	0.0293038	-0.01734	0.0789428	0.0524332	-0.0465715	0.0177455	0.069048	0.100656	-0.0444705	-0.0240185	0.00706779	0.0427861	-0.0439201	0.0214353	-0.0066604	-0.0266453	-0.0312845	0.00728305	0.0025746	0.0353764	0.0580335	-0.0304297	-0.00126493	-0.018123	0.00764906	0.0149802	-0.00774415	-0.0190144	0.00705081	0.00516148	8.60776e-05	0.039136	0.0286031	-0.0160326	-0.00524549	-0.00874185	-0.00849803	0.018833	0.0214064	-0.00141152	-0.00279959	0.00968641	-0.00994579	-0.00613555	0.0132481
TS9-H8	-0.117101	-0.0938753	0.0350175	0.0530288	-0.0502014	0.061014	-0.056368	0.0111557	-0.0145347	-0.0215137	0.0168187	0.0455464	-0.0674382	-0.0196676	0.0181573	0.0199041	0.00592746	0.0447702	0.0239746	0.0135666	0.0227225	0.0483117	-0.0129637	-0.0196778	0.00242924	0.0126844	0.067985	0.027091	-0.00847877	-0.00538002	-0.0248836	-0.030542	-0.0161268	-0.0295727	0.0216815	0.0192601	0.0155816	0.0162754	0.00160632	0.0267503	-0.000160701	0.0108375	0.00476805	0.00453574	0.026649	0.0116339	0.0116058	-0.00986202	0.027713
WT1-D3	-0.120066	-0.0508301	0.0741203	-0.0668754	0.06138	0.0326879	0.0590703	-0.0611774	-0.0638845	0.0496747	0.0428845	-0.0333737	0.0358923	0.0548738	0.026424	-0.0571555	-0.00199487	0.00758719	0.0286591	0.0508163	0.0451772	-0.0214661	-0.0157352	-0.0249132	-0.00414115	-0.0225824	0.00697542	-0.00193297	-0.00299328	0.000714484	0.0273733	0.00450825	0.0310635	-0.0232443	-0.0244549	-0.030649	0.0333021	0.0150503	-0.0287071	0.0214975	-0.0368025	-0.0114406	0.00167273	-0.00826025	-0.0267177	-0.0175849	0.015411	-0.015085	-0.0166683
WT7-H8	-0.19769	-0.0392791	-0.00774854	0.00308598	0.0610576	0.0469306	0.0923345	-0.130519	-0.00590064	-0.013061	0.0319762	0.0267192	0.0639238	-0.00777185	0.0705588	-0.00785045	0.111628	0.0030235	-0.0306592	-0.0674904	-0.00883028	0.0185837	-0.00951976	0.0388207	-0.0368937	-0.0239521	0.0331037	-0.0253366	-0.00583933	0.0154774	-0.0133205	0.0279866	-0.0125796	-0.00670876	-0.0138883	0.030646	0.0152753	0.0240201	0.0209144	-0.00794855	-0.00539862	0.0119966	0.0202631	-0.00295469	-0.0082171	0.0112068	0.00951508	0.0165854	0.023427
Biplot	0	0
Site constraints	0	0
[truncated: 128 more columns]

## Sheet: Exposed weighted unifrac DM
	CS1-D7	CS1-H0	CS10-D3	CS10-H0	CS10-H8	CS2-D5	CS2-D7	CS3-D5	CS3-D7	CS3-H0	CS4-D5	CS4-H8	CS5-D5	CS5-H0	CS5-H8	CS6-D3	CS7-D3	CS7-H0	CS7-H8	CS8-D3	CS8-D5	CS8-H8	CS9-H8	TS1-H8	TS2-D5	TS3-D3	TS4-D3	TS6-D7	TS6-H8	WC1-D7	WC11-D7	WC2-D7	WC3-D7	WC4-D3	WC5-D3	WC5-D7	WC6-D3	WC8-D3	WT10-H8	WT4-D3	WT4-H0	WT7-D5	WT8-H8	WT9-D7	CS10-D5	CS12-D7	CS4-D7	CS6-H8	CS8-H0
CS1-D7	0	0.0806338	0.155689	0.169689	0.0751302	0.142232	0.100568	0.055797	0.197341	0.226619	0.188268	0.150217	0.264984	0.259616	0.186663	0.132952	0.146895	0.168357	0.185051	0.11482	0.278866	0.194315	0.269208	0.226463	0.0942941	0.116823	0.193533	0.212861	0.187632	0.164036	0.159323	0.142038	0.214886	0.151813	0.120969	0.0564641	0.0970474	0.155294	0.20848	0.126417	0.220498	0.0861061	0.360867	0.294548	0.123676	0.0755304	0.150891	0.205556	0.219145
CS1-H0	0.0806338	0	0.176804	0.236607	0.136991	0.203057	0.157206	0.0680895	0.167649	0.254758	0.233159	0.207368	0.304489	0.304024	0.237194	0.142324	0.206119	0.192253	0.229881	0.0903486	0.297643	0.245579	0.306374	0.246522	0.124022	0.158502	0.250715	0.173875	0.242675	0.154631	0.139704	0.176065	0.267109	0.157161	0.127871	0.101971	0.138063	0.204677	0.256227	0.0920211	0.261848	0.093487	0.423997	0.257717	0.156625	0.0947987	0.21332	0.257399	0.28435
CS10-D3	0.155689	0.176804	0	0.126489	0.201117	0.237979	0.150135	0.193526	0.277756	0.31152	0.150615	0.153623	0.245079	0.319656	0.240662	0.166516	0.270517	0.22703	0.298043	0.209038	0.220445	0.15346	0.326442	0.25131	0.226279	0.227496	0.287628	0.309858	0.270171	0.229443	0.0662082	0.217219	0.278291	0.207528	0.189261	0.183709	0.191943	0.237835	0.138266	0.231442	0.293855	0.148359	0.357374	0.382333	0.203097	0.171271	0.209906	0.27412	0.190232
CS10-H0	0.169689	0.236607	0.126489	0	0.157721	0.19128	0.165698	0.193768	0.352548	0.248649	0.113733	0.141763	0.181166	0.270222	0.217552	0.216869	0.204776	0.192409	0.235559	0.252766	0.220875	0.132119	0.314527	0.263945	0.206531	0.180084	0.244696	0.346906	0.210248	0.280751	0.139981	0.219762	0.275296	0.24818	0.250464	0.170769	0.178308	0.231935	0.120777	0.276733	0.279175	0.21374	0.307956	0.436075	0.243912	0.202319	0.16959	0.245879	0.0814734
CS10-H8	0.0751302	0.136991	0.201117	0.157721	0	0.135863	0.103298	0.116875	0.24523	0.205128	0.187764	0.150361	0.239532	0.220222	0.17213	0.126428	0.146288	0.157454	0.174914	0.173645	0.301885	0.18839	0.269363	0.226904	0.130096	0.113255	0.164319	0.273943	0.179526	0.17548	0.21528	0.150295	0.224847	0.16538	0.146917	0.0917903	0.116937	0.156242	0.21773	0.176343	0.219185	0.142699	0.328341	0.341725	0.169822	0.111276	0.123129	0.2005	0.179455
CS2-D5	0.142232	0.203057	0.237979	0.19128	0.135863	0	0.115996	0.164608	0.295592	0.148007	0.203469	0.200562	0.169543	0.152572	0.0875673	0.185136	0.0827709	0.129832	0.139849	0.216184	0.374941	0.133013	0.169423	0.168487	0.173119	0.0854124	0.0786576	0.314601	0.072392	0.196512	0.255659	0.117231	0.15555	0.170772	0.168425	0.129894	0.138838	0.110468	0.189894	0.220025	0.123693	0.142131	0.226771	0.40155	0.166985	0.204855	0.107988	0.119342	0.222591
CS2-D7	0.100568	0.157206	0.150135	0.165698	0.103298	0.115996	0	0.152442	0.253861	0.214159	0.174355	0.143011	0.207948	0.189246	0.127615	0.116576	0.153115	0.116035	0.188406	0.208956	0.296357	0.129772	0.250865	0.136244	0.184125	0.117722	0.154699	0.311182	0.161892	0.159188	0.172531	0.115326	0.167152	0.134465	0.136679	0.121408	0.131883	0.120627	0.138612	0.205967	0.185098	0.124372	0.278626	0.384821	0.157323	0.152345	0.0908799	0.188241	0.203962
CS3-D5	0.055797	0.0680895	0.193526	0.193768	0.116875	0.164608	0.152442	0	0.185004	0.247249	0.209848	0.189927	0.295555	0.295819	0.233679	0.177626	0.171699	0.199535	0.194346	0.0759855	0.297372	0.225713	0.29228	0.264493	0.0738744	0.125601	0.214935	0.163268	0.207833	0.177482	0.166485	0.153958	0.245613	0.168045	0.12417	0.0705043	0.115602	0.183815	0.240255	0.0899437	0.250296	0.0900212	0.385675	0.260886	0.129849	0.0859306	0.181403	0.233716	0.242562
CS3-D7	0.197341	0.167649	0.277756	0.352548	0.24523	0.295592	0.253861	0.185004	0	0.414132	0.349417	0.308881	0.459657	0.424978	0.341982	0.26745	0.327782	0.353472	0.347718	0.167283	0.424621	0.351874	0.423327	0.353446	0.249847	0.281055	0.293812	0.1622	0.35272	0.190981	0.235495	0.255959	0.340202	0.195587	0.16686	0.220247	0.254369	0.270592	0.355113	0.102823	0.351319	0.166494	0.455238	0.186059	0.243439	0.212527	0.270141	0.352169	0.379264
CS3-H0	0.226619	0.254758	0.31152	0.248649	0.205128	0.148007	0.214159	0.247249	0.414132	0	0.293475	0.266438	0.147714	0.148129	0.109285	0.201497	0.152576	0.175072	0.189862	0.304813	0.407428	0.198127	0.160626	0.184648	0.247352	0.179821	0.155862	0.389876	0.135908	0.304018	0.33675	0.223047	0.209631	0.296398	0.283486	0.218331	0.21092	0.209809	0.297482	0.331019	0.162682	0.26059	0.277743	0.49188	0.288869	0.208991	0.234755	0.154124	0.300988
CS4-D5	0.188268	0.233159	0.150615	0.113733	0.187764	0.203469	0.174355	0.209848	0.349417	0.293475	0	0.0818735	0.1947	0.291369	0.23335	0.234819	0.167455	0.134056	0.170214	0.211917	0.283061	0.127705	0.23906	0.204426	0.170075	0.165993	0.270226	0.32921	0.190137	0.269307	0.169917	0.14736	0.239186	0.237392	0.251745	0.154051	0.140639	0.176025	0.107733	0.277361	0.198722	0.195842	0.328217	0.43104	0.140774	0.242938	0.181002	0.188696	0.159677
CS4-H8	0.150217	0.207368	0.153623	0.141763	0.150361	0.200562	0.143011	0.189927	0.308881	0.266438	0.0818735	0	0.241249	0.289219	0.205206	0.16564	0.15476	0.137445	0.165858	0.194921	0.330299	0.122646	0.220849	0.193895	0.151461	0.162557	0.255718	0.305063	0.182977	0.254491	0.171461	0.126551	0.225327	0.220578	0.228836	0.126304	0.0993151	0.147626	0.158819	0.255898	0.198915	0.173921	0.345537	0.404806	0.128606	0.186553	0.174305	0.149479	0.214568
CS5-D5	0.264984	0.304489	0.245079	0.181166	0.239532	0.169543	0.207948	0.295555	0.459657	0.147714	0.1947	0.241249	0	0.124743	0.139243	0.284378	0.180877	0.157345	0.234879	0.326335	0.315074	0.160532	0.204818	0.179399	0.283822	0.205902	0.193152	0.42427	0.145751	0.348909	0.26533	0.26254	0.222688	0.327046	0.326151	0.253709	0.260119	0.242963	0.177144	0.371152	0.200383	0.301756	0.197733	0.529662	0.312649	0.308871	0.207658	0.216212	0.195854
CS5-H0	0.259616	0.304024	0.319656	0.270222	0.220222	0.152572	0.189246	0.295819	0.424978	0.148129	0.291369	0.289219	0.124743	0	0.142402	0.272451	0.199661	0.187438	0.258712	0.349262	0.397334	0.216147	0.205163	0.191144	0.306503	0.210595	0.149555	0.447812	0.148932	0.314452	0.339067	0.267475	0.223263	0.29344	0.292725	0.266222	0.273318	0.248893	0.269795	0.336716	0.204604	0.292034	0.156931	0.511081	0.317067	0.291532	0.174233	0.220591	0.264158
CS5-H8	0.186663	0.237194	0.240662	0.217552	0.17213	0.0875673	0.127615	0.233679	0.341982	0.109285	0.23335	0.205206	0.139243	0.142402	0	0.186333	0.119599	0.140172	0.165616	0.264802	0.404511	0.137592	0.137452	0.115321	0.22435	0.131827	0.0980724	0.368535	0.0775349	0.242393	0.271182	0.144843	0.118547	0.219579	0.21865	0.170384	0.159009	0.122547	0.205077	0.290019	0.0865434	0.195124	0.233134	0.467767	0.21234	0.221892	0.175718	0.113457	0.273288
CS6-D3	0.132952	0.142324	0.166516	0.216869	0.126428	0.185136	0.116576	0.177626	0.26745	0.201497	0.234819	0.16564	0.284378	0.272451	0.186333	0	0.20787	0.175391	0.234663	0.201948	0.319705	0.178169	0.269097	0.204551	0.209171	0.168624	0.235118	0.299382	0.212129	0.192294	0.188619	0.171908	0.237853	0.167785	0.17261	0.153429	0.14968	0.186374	0.229532	0.215789	0.248496	0.14494	0.388275	0.372524	0.190476	0.133349	0.185493	0.200948	0.278816
CS7-D3	0.146895	0.206119	0.270517	0.204776	0.146288	0.0827709	0.153115	0.171699	0.327782	0.152576	0.167455	0.15476	0.180877	0.199661	0.119599	0.20787	0	0.099985	0.0774721	0.196439	0.396081	0.150996	0.14447	0.171652	0.137053	0.0995997	0.131784	0.306776	0.0724791	0.233479	0.284462	0.0949907	0.178209	0.209404	0.202448	0.117328	0.103659	0.0974299	0.202451	0.245836	0.104461	0.173877	0.290407	0.411705	0.149538	0.204232	0.163242	0.0804009	0.249066
CS7-H0	0.168357	0.192253	0.22703	0.192409	0.157454	0.129832	0.116035	0.199535	0.353472	0.175072	0.134056	0.137445	0.157345	0.187438	0.140172	0.175391	0.099985	0	0.143655	0.209405	0.316666	0.117881	0.190106	0.0998208	0.153253	0.110302	0.201174	0.323304	0.111869	0.241187	0.245245	0.119964	0.178129	0.219829	0.230974	0.150469	0.129898	0.119903	0.146517	0.267739	0.155495	0.194989	0.299202	0.429924	0.168264	0.213804	0.131804	0.154825	0.228241
CS7-H8	0.185051	0.229881	0.298043	0.235559	0.174914	0.139849	0.188406	0.194346	0.347718	0.189862	0.170214	0.165858	0.234879	0.258712	0.165616	0.234663	0.0774721	0.143655	0	0.218945	0.425935	0.190655	0.142837	0.207453	0.142186	0.126663	0.173912	0.305447	0.123734	0.256626	0.309847	0.109024	0.21848	0.240102	0.228731	0.144709	0.116959	0.1131	0.227296	0.276366	0.0949592	0.200415	0.346154	0.435618	0.148447	0.228165	0.214355	0.0812923	0.283802
CS8-D3	0.11482	0.0903486	0.209038	0.252766	0.173645	0.216184	0.208956	0.0759855	0.167283	0.304813	0.211917	0.194921	0.326335	0.349262	0.264802	0.201948	0.196439	0.209405	0.218945	0	0.337553	0.242813	0.302107	0.270357	0.0952351	0.168025	0.282322	0.128118	0.222944	0.206092	0.172678	0.16949	0.260586	0.186684	0.161386	0.109473	0.134135	0.203822	0.246962	0.0903813	0.268456	0.106503	0.436607	0.243453	0.133156	0.139237	0.234787	0.253126	0.303636
CS8-D5	0.278866	0.297643	0.220445	0.220875	0.301885	0.374941	0.296357	0.297372	0.424621	0.407428	0.283061	0.330299	0.315074	0.397334	0.404511	0.319705	0.396081	0.316666	0.425935	0.337553	0	0.324443	0.496553	0.372994	0.331416	0.348889	0.416884	0.427444	0.400085	0.366664	0.240153	0.390465	0.435301	0.349977	0.328151	0.321634	0.353896	0.408461	0.248472	0.337825	0.463108	0.319008	0.441416	0.492729	0.367926	0.287282	0.313135	0.459273	0.172349
CS8-H8	0.194315	0.245579	0.15346	0.132119	0.18839	0.133013	0.129772	0.225713	0.351874	0.198127	0.127705	0.122646	0.160532	0.216147	0.137592	0.178169	0.150996	0.117881	0.190655	0.242813	0.324443	0	0.205268	0.164315	0.209613	0.129795	0.198739	0.353705	0.131003	0.248475	0.187198	0.143721	0.187751	0.221115	0.223446	0.168345	0.148256	0.145339	0.11637	0.281482	0.184149	0.195164	0.252102	0.447653	0.206483	0.215794	0.131092	0.157482	0.18488
CS9-H8	0.269208	0.306374	0.326442	0.314527	0.269363	0.169423	0.250865	0.29228	0.423327	0.160626	0.23906	0.220849	0.204818	0.205163	0.137452	0.269097	0.14447	0.190106	0.142837	0.302107	0.496553	0.205268	0	0.190094	0.248	0.1914	0.186045	0.403841	0.128712	0.313749	0.347615	0.175803	0.205386	0.307798	0.299594	0.237364	0.197989	0.175678	0.272378	0.350181	0.0808825	0.269952	0.307182	0.503575	0.194862	0.292406	0.257121	0.0917767	0.368358
TS1-H8	0.226463	0.246522	0.25131	0.263945	0.226904	0.168487	0.136244	0.264493	0.353446	0.184648	0.204426	0.193895	0.179399	0.191144	0.115321	0.204551	0.171652	0.0998208	0.207453	0.270357	0.372994	0.164315	0.190094	0	0.234327	0.184007	0.165599	0.385947	0.14379	0.2338	0.279778	0.133885	0.102708	0.207595	0.242562	0.204428	0.182382	0.1108	0.170757	0.319605	0.12532	0.205734	0.251293	0.485499	0.199691	0.270713	0.199696	0.174637	0.299833
TS2-D5	0.0942941	0.124022	0.226279	0.206531	0.130096	0.173119	0.184125	0.0738744	0.249847	0.247352	0.170075	0.151461	0.283822	0.306503	0.22435	0.209171	0.137053	0.153253	0.142186	0.0952351	0.331416	0.209613	0.248	0.234327	0	0.111238	0.231336	0.176995	0.175506	0.216416	0.225136	0.117838	0.228807	0.20635	0.169977	0.069833	0.0830688	0.145112	0.211667	0.158231	0.210506	0.119839	0.393709	0.318354	0.107152	0.123804	0.189491	0.19572	0.257171
TS3-D3	0.116823	0.158502	0.227496	0.180084	0.113255	0.0854124	0.117722	0.125601	0.281055	0.179821	0.165993	0.162557	0.205902	0.210595	0.131827	0.168624	0.0995997	0.110302	0.126663	0.168025	0.348889	0.129795	0.1914	0.184007	0.111238	0	0.143304	0.256462	0.100835	0.172112	0.2419	0.0875325	0.169812	0.162483	0.141959	0.0761073	0.0847314	0.102638	0.165683	0.183572	0.153297	0.122584	0.29931	0.365895	0.13695	0.168886	0.114661	0.145987	0.217807
TS4-D3	0.193533	0.250715	0.287628	0.244696	0.164319	0.0786576	0.154699	0.214935	0.293812	0.155862	0.270226	0.255718	0.193152	0.149555	0.0980724	0.235118	0.131784	0.201174	0.173912	0.282322	0.416884	0.198739	0.186045	0.165599	0.231336	0.143304	0	0.372749	0.118895	0.192334	0.310424	0.151135	0.14915	0.177902	0.169787	0.174939	0.18446	0.120808	0.255338	0.247301	0.111535	0.186825	0.183632	0.427514	0.226168	0.225522	0.139677	0.139334	0.251198
TS6-D7	0.212861	0.173875	0.309858	0.346906	0.273943	0.314601	0.311182	0.163268	0.1622	0.389876	0.32921	0.305063	0.42427	0.447812	0.368535	0.299382	0.306776	0.323304	0.305447	0.128118	0.427444	0.353705	0.403841	0.385947	0.176995	0.256462	0.372749	0	0.340601	0.273164	0.262525	0.277151	0.375322	0.275577	0.255343	0.206886	0.240801	0.308392	0.363664	0.157206	0.375337	0.206795	0.533055	0.156925	0.232728	0.231044	0.333046	0.357423	0.398071
TS6-H8	0.187632	0.242675	0.270171	0.210248	0.179526	0.072392	0.161892	0.207833	0.35272	0.135908	0.190137	0.182977	0.145751	0.148932	0.0775349	0.212129	0.0724791	0.111869	0.123734	0.222944	0.400085	0.131003	0.128712	0.14379	0.175506	0.100835	0.118895	0.340601	0	0.252076	0.285316	0.128019	0.140351	0.217272	0.222331	0.152796	0.132666	0.121584	0.188465	0.261595	0.105735	0.192597	0.236172	0.445446	0.185437	0.240693	0.1574	0.0887457	0.256784
WC1-D7	0.164036	0.154631	0.229443	0.280751	0.17548	0.196512	0.159188	0.177482	0.190981	0.304018	0.269307	0.254491	0.348909	0.314452	0.242393	0.192294	0.233479	0.241187	0.256626	0.206092	0.366664	0.248475	0.313749	0.2338	0.216416	0.172112	0.192334	0.273164	0.252076	0	0.231296	0.16111	0.176919	0.0473342	0.100767	0.163947	0.170912	0.174674	0.243132	0.150011	0.248548	0.112501	0.302302	0.331477	0.183654	0.182147	0.181406	0.269261	0.290276
WC11-D7	0.159323	0.139704	0.0662082	0.139981	0.21528	0.255659	0.172531	0.166485	0.235495	0.33675	0.169917	0.171461	0.26533	0.339067	0.271182	0.188619	0.284462	0.245245	0.309847	0.172678	0.240153	0.187198	0.347615	0.279778	0.225136	0.2419	0.310424	0.262525	0.285316	0.231296	0	0.237631	0.304769	0.211819	0.200747	0.195062	0.204219	0.2582	0.162135	0.183219	0.317818	0.160973	0.385559	0.344857	0.223639	0.180196	0.223266	0.292789	0.209792
WC2-D7	0.142038	0.176065	0.217219	0.219762	0.150295	0.117231	0.115326	0.153958	0.255959	0.223047	0.14736	0.126551	0.26254	0.267475	0.144843	0.171908	0.0949907	0.119964	0.109024	0.16949	0.390465	0.143721	0.175803	0.133885	0.117838	0.0875325	0.151135	0.277151	0.128019	0.16111	0.237631	0	0.141619	0.143279	0.139477	0.0923539	0.0620898	0.0478782	0.147829	0.211577	0.108186	0.107362	0.324514	0.381878	0.0873624	0.186659	0.156999	0.116376	0.270242
WC3-D7	0.214886	0.267109	0.278291	0.275296	0.224847	0.15555	0.167152	0.245613	0.340202	0.209631	0.239186	0.225327	0.222688	0.223263	0.118547	0.237853	0.178209	0.178129	0.21848	0.260586	0.435301	0.187751	0.205386	0.102708	0.228807	0.169812	0.14915	0.375322	0.140351	0.176919	0.304769	0.141619	0	0.157538	0.226569	0.184082	0.177511	0.117679	0.205913	0.3025	0.139465	0.191444	0.216336	0.475171	0.207809	0.275455	0.216028	0.184538	0.319416
WC4-D3	0.151813	0.157161	0.207528	0.24818	0.16538	0.170772	0.134465	0.168045	0.195587	0.296398	0.237392	0.220578	0.327046	0.29344	0.219579	0.167785	0.209404	0.219829	0.240102	0.186684	0.349977	0.221115	0.307798	0.207595	0.20635	0.162483	0.177902	0.275577	0.217272	0.0473342	0.211819	0.143279	0.157538	0	0.103004	0.150184	0.159295	0.159891	0.220865	0.157102	0.24001	0.0948448	0.284264	0.333561	0.166735	0.178873	0.163709	0.25127	0.26781
WC5-D3	0.120969	0.127871	0.189261	0.250464	0.146917	0.168425	0.136679	0.12417	0.16686	0.283486	0.251745	0.228836	0.326151	0.292725	0.21865	0.17261	0.202448	0.230974	0.228731	0.161386	0.328151	0.223446	0.299594	0.242562	0.169977	0.141959	0.169787	0.255343	0.222331	0.100767	0.200747	0.139477	0.226569	0.103004	0	0.122009	0.137809	0.160678	0.233791	0.108372	0.233688	0.0715738	0.331219	0.300429	0.160282	0.13974	0.149889	0.244773	0.262807
WC5-D7	0.0564641	0.101971	0.183709	0.170769	0.0917903	0.129894	0.121408	0.0705043	0.220247	0.218331	0.154051	0.126304	0.253709	0.266222	0.170384	0.153429	0.117328	0.150469	0.144709	0.109473	0.321634	0.168345	0.237364	0.204428	0.069833	0.0761073	0.174939	0.206886	0.152796	0.163947	0.195062	0.0923539	0.184082	0.150184	0.122009	0	0.0500124	0.117604	0.185569	0.137696	0.186527	0.0769458	0.354072	0.31169	0.0989315	0.109423	0.151253	0.169576	0.225929
WC6-D3	0.0970474	0.138063	0.191943	0.178308	0.116937	0.138838	0.131883	0.115602	0.254369	0.21092	0.140639	0.0993151	0.260119	0.273318	0.159009	0.14968	0.103659	0.129898	0.116959	0.134135	0.353896	0.148256	0.197989	0.182382	0.0830688	0.0847314	0.18446	0.240801	0.132666	0.170912	0.204219	0.0620898	0.177511	0.159295	0.137809	0.0500124	0	0.088631	0.168168	0.182168	0.158813	0.104691	0.362694	0.345772	0.0999683	0.132236	0.162787	0.129576	0.246774
WC8-D3	0.155294	0.204677	0.237835	0.231935	0.156242	0.110468	0.120627	0.183815	0.270592	0.209809	0.176025	0.147626	0.242963	0.248893	0.122547	0.186374	0.0974299	0.119903	0.1131	0.203822	0.408461	0.145339	0.175678	0.1108	0.145112	0.102638	0.120808	0.308392	0.121584	0.174674	0.2582	0.0478782	0.117679	0.159891	0.160678	0.117604	0.088631	0	0.16496	0.241307	0.0971178	0.131419	0.296321	0.409741	0.128948	0.212575	0.169354	0.103238	0.282583
WT10-H8	0.20848	0.256227	0.138266	0.120777	0.21773	0.189894	0.138612	0.240255	0.355113	0.297482	0.107733	0.158819	0.177144	0.269795	0.205077	0.229532	0.202451	0.146517	0.227296	0.246962	0.248472	0.11637	0.272378	0.170757	0.211667	0.165683	0.255338	0.363664	0.188465	0.243132	0.162135	0.147829	0.205913	0.220865	0.233791	0.185569	0.168168	0.16496	0	0.294055	0.220495	0.194995	0.299255	0.465709	0.18976	0.267556	0.173419	0.237788	0.147227
WT4-D3	0.126417	0.0920211	0.231442	0.276733	0.176343	0.220025	0.205967	0.0899437	0.102823	0.331019	0.277361	0.255898	0.371152	0.336716	0.290019	0.215789	0.245836	0.267739	0.276366	0.0903813	0.337825	0.281482	0.350181	0.319605	0.158231	0.183572	0.247301	0.157206	0.261595	0.150011	0.183219	0.211577	0.3025	0.157102	0.108372	0.137696	0.182168	0.241307	0.294055	0	0.307344	0.119585	0.402456	0.220267	0.186257	0.141262	0.19206	0.293464	0.294402
WT4-H0	0.220498	0.261848	0.293855	0.279175	0.219185	0.123693	0.185098	0.250296	0.351319	0.162682	0.198722	0.198915	0.200383	0.204604	0.0865434	0.248496	0.104461	0.155495	0.0949592	0.268456	0.463108	0.184149	0.0808825	0.12532	0.210506	0.153297	0.111535	0.375337	0.105735	0.248548	0.317818	0.108186	0.139465	0.24001	0.233688	0.186527	0.158813	0.0971178	0.220495	0.307344	0	0.204377	0.27361	0.476395	0.1535	0.269302	0.219004	0.0683745	0.323551
WT7-D5	0.0861061	0.093487	0.148359	0.21374	0.142699	0.142131	0.124372	0.0900212	0.166494	0.26059	0.195842	0.173921	0.301756	0.292034	0.195124	0.14494	0.173877	0.194989	0.200415	0.106503	0.319008	0.195164	0.269952	0.205734	0.119839	0.122584	0.186825	0.206795	0.192597	0.112501	0.160973	0.107362	0.191444	0.0948448	0.0715738	0.0769458	0.104691	0.131419	0.194995	0.119585	0.204377	0	0.349825	0.297822	0.0963396	0.12513	0.16946	0.214797	0.26201
WT8-H8	0.360867	0.423997	0.357374	0.307956	0.328341	0.226771	0.278626	0.385675	0.455238	0.277743	0.328217	0.345537	0.197733	0.156931	0.233134	0.388275	0.290407	0.299202	0.346154	0.436607	0.441416	0.252102	0.307182	0.251293	0.393709	0.29931	0.183632	0.533055	0.236172	0.302302	0.385559	0.324514	0.216336	0.284264	0.331219	0.354072	0.362694	0.296321	0.299255	0.402456	0.27361	0.349825	0	0.589285	0.381642	0.400942	0.230115	0.305088	0.294403
WT9-D7	0.294548	0.257717	0.382333	0.436075	0.341725	0.40155	0.384821	0.260886	0.186059	0.49188	0.43104	0.404806	0.529662	0.511081	0.467767	0.372524	0.411705	0.429924	0.435618	0.243453	0.492729	0.447653	0.503575	0.485499	0.318354	0.365895	0.427514	0.156925	0.445446	0.331477	0.344857	0.381878	0.475171	0.333561	0.300429	0.31169	0.345772	0.409741	0.465709	0.220267	0.476395	0.297822	0.589285	0	0.343353	0.301557	0.394985	0.457669	0.461695
CS10-D5	0.123676	0.156625	0.203097	0.243912	0.169822	0.166985	0.157323	0.129849	0.243439	0.288869	0.140774	0.128606	0.312649	0.317067	0.21234	0.190476	0.149538	0.168264	0.148447	0.133156	0.367926	0.206483	0.194862	0.199691	0.107152	0.13695	0.226168	0.232728	0.185437	0.183654	0.223639	0.0873624	0.207809	0.166735	0.160282	0.0989315	0.0999683	0.128948	0.18976	0.186257	0.1535	0.0963396	0.381642	0.343353	0	0.169008	0.191537	0.156783	0.293941
CS12-D7	0.0755304	0.0947987	0.171271	0.202319	0.111276	0.204855	0.152345	0.0859306	0.212527	0.208991	0.242938	0.186553	0.308871	0.291532	0.221892	0.133349	0.204232	0.213804	0.228165	0.139237	0.287282	0.215794	0.292406	0.270713	0.123804	0.168886	0.225522	0.231044	0.240693	0.182147	0.180196	0.186659	0.275455	0.178873	0.13974	0.109423	0.132236	0.212575	0.267556	0.141262	0.269302	0.12513	0.400942	0.301557	0.169008	0	0.18912	0.230724	0.249317
CS4-D7	0.150891	0.21332	0.209906	0.16959	0.123129	0.107988	0.0908799	0.181403	0.270141	0.234755	0.181002	0.174305	0.207658	0.174233	0.175718	0.185493	0.163242	0.131804	0.214355	0.234787	0.313135	0.131092	0.257121	0.199696	0.189491	0.114661	0.139677	0.333046	0.1574	0.181406	0.223266	0.156999	0.216028	0.163709	0.149889	0.151253	0.162787	0.169354	0.173419	0.19206	0.219004	0.16946	0.230115	0.394985	0.191537	0.18912	0	0.214605	0.16003
CS6-H8	0.205556	0.257399	0.27412	0.245879	0.2005	0.119342	0.188241	0.233716	0.352169	0.154124	0.188696	0.149479	0.216212	0.220591	0.113457	0.200948	0.0804009	0.154825	0.0812923	0.253126	0.459273	0.157482	0.0917767	0.174637	0.19572	0.145987	0.139334	0.357423	0.0887457	0.269261	0.292789	0.116376	0.184538	0.25127	0.244773	0.169576	0.129576	0.103238	0.237788	0.293464	0.0683745	0.214797	0.305088	0.457669	0.156783	0.230724	0.214605	0	0.313819
CS8-H0	0.219145	0.28435	0.190232	0.0814734	0.179455	0.222591	0.203962	0.242562	0.379264	0.300988	0.159677	0.214568	0.195854	0.264158	0.273288	0.278816	0.249066	0.228241	0.283802	0.303636	0.172349	0.18488	0.368358	0.299833	0.257171	0.217807	0.251198	0.398071	0.256784	0.290276	0.209792	0.270242	0.319416	0.26781	0.262807	0.225929	0.246774	0.282583	0.147227	0.294402	0.323551	0.26201	0.294403	0.461695	0.293941	0.249317	0.16003	0.313819	0
CS9-D7	0.168046	0.207056	0.273628	0.203282	0.14134	0.0861926	0.142384	0.197611	0.362329	0.0875571	0.239015	0.233875	0.122932	0.125441	0.0959788	0.183827	0.112124	0.122434	0.152166	0.260336	0.349764	0.178672	0.185901	0.158729	0.207621	0.141225	0.109991	0.350247	0.0993029	0.255184	0.289301	0.189897	0.188414	0.231315	0.231318	0.178613	0.186735	0.172089	0.242461	0.27942	0.149608	0.218706	0.248476	0.444812	0.248365	0.20523	0.154754	0.148852	0.226796
TS2-D7	0.0835487	0.103739	0.168431	0.228236	0.127216	0.164442	0.134214	0.0882885	0.147352	0.281967	0.23609	0.209529	0.32662	0.290956	0.219567	0.166143	0.195355	0.228668	0.235578	0.131246	0.299146	0.230651	0.30136	0.241479	0.129866	0.142867	0.162461	0.226921	0.223617	0.103959	0.185076	0.138729	0.221761	0.102982	0.0557302	0.0927812	0.137442	0.16084	0.23594	0.0946876	0.232881	0.0594522	0.332413	0.286894	0.126171	0.100816	0.149618	0.24129	0.246104
TS3-D5	0.266828	0.227054	0.339823	0.415578	0.319105	0.353811	0.324952	0.236543	0.0806957	0.47009	0.406329	0.377784	0.517781	0.482021	0.410312	0.337577	0.384752	0.411002	0.412784	0.219801	0.48129	0.413514	0.472546	0.404526	0.297565	0.335418	0.344874	0.144223	0.412011	0.239663	0.299781	0.312644	0.394615	0.248066	0.223246	0.280055	0.315134	0.332169	0.417101	0.157741	0.411066	0.226784	0.504594	0.146846	0.288844	0.273768	0.325896	0.416308	0.436706
TS3-H0	0.183327	0.147946	0.246374	0.329827	0.233142	0.276946	0.231238	0.17221	0.099404	0.392924	0.319832	0.289571	0.426518	0.391693	0.316334	0.243545	0.313208	0.317918	0.339455	0.152667	0.395462	0.316611	0.394908	0.302958	0.236897	0.260802	0.284903	0.203247	0.324736	0.138811	0.207272	0.241555	0.273956	0.133145	0.168053	0.211779	0.240792	0.2576	0.319574	0.122891	0.332435	0.147682	0.408155	0.224563	0.217157	0.197127	0.264034	0.347531	0.356208
TS4-D5	0.163485	0.146392	0.264042	0.278971	0.140267	0.253595	0.192769	0.189212	0.233086	0.273867	0.286887	0.250542	0.346188	0.334935	0.280171	0.133474	0.253455	0.236392	0.263105	0.22397	0.338636	0.297162	0.357804	0.284333	0.221617	0.215679	0.263678	0.277762	0.296356	0.175858	0.260753	0.231517	0.319093	0.193641	0.183265	0.177724	0.198968	0.243391	0.309942	0.195362	0.30634	0.189584	0.438303	0.33599	0.240355	0.16509	0.231121	0.291481	0.294865
TS5-H8	0.217119	0.183371	0.322649	0.363415	0.242287	0.351396	0.309863	0.191881	0.122707	0.412537	0.378142	0.330989	0.474671	0.45925	0.39461	0.284234	0.350671	0.369196	0.340211	0.185577	0.431992	0.392872	0.452518	0.42712	0.241864	0.303648	0.364195	0.102276	0.389471	0.262786	0.270534	0.317302	0.415233	0.275107	0.244147	0.246966	0.276726	0.340694	0.412153	0.15818	0.407252	0.241212	0.544857	0.153727	0.301079	0.211269	0.333862	0.384155	0.391249
TS6-D3	0.208185	0.255949	0.164947	0.121651	0.235352	0.258023	0.225324	0.226664	0.375284	0.347043	0.0732762	0.127775	0.23215	0.340812	0.293855	0.285674	0.221034	0.183285	0.230978	0.226308	0.221347	0.187103	0.296322	0.250011	0.183201	0.216605	0.329323	0.337789	0.242104	0.317647	0.176796	0.196924	0.287442	0.28534	0.288417	0.183929	0.1809	0.232279	0.104788	0.299576	0.265415	0.227687	0.375736	0.44548	0.169236	0.261102	0.231878	0.253655	0.135869
WC10-H8	0.193606	0.267241	0.269399	0.228969	0.155915	0.0913925	0.134923	0.241327	0.296479	0.178125	0.259069	0.229434	0.186154	0.145344	0.0937658	0.213336	0.151021	0.186362	0.200429	0.297365	0.396843	0.180974	0.211262	0.150015	0.255251	0.163507	0.0437857	0.397023	0.124758	0.208641	0.293632	0.174271	0.145988	0.184041	0.185673	0.19986	0.206387	0.132086	0.238837	0.267016	0.136642	0.204456	0.178267	0.449608	0.242842	0.240631	0.124139	0.156134	0.22961
WC4-D7	0.0982531	0.129775	0.219553	0.182214	0.0831252	0.0824226	0.0837463	0.126488	0.280422	0.153544	0.187205	0.177521	0.186744	0.177996	0.131049	0.132917	0.100546	0.0951687	0.15581	0.186577	0.316388	0.146376	0.210439	0.171527	0.13934	0.0741423	0.136963	0.285564	0.12884	0.168079	0.233452	0.116801	0.191828	0.161088	0.148296	0.0965979	0.109159	0.126142	0.189695	0.188681	0.17501	0.134114	0.299137	0.363311	0.15956	0.136345	0.10192	0.167576	0.207949
WC4-H8	0.0719918	0.127745	0.17694	0.143559	0.0736482	0.0904469	0.0842203	0.0968414	0.247856	0.195277	0.137988	0.12263	0.216705	0.209969	0.14296	0.125974	0.112927	0.119571	0.156189	0.145941	0.305202	0.134291	0.224308	0.184522	0.105903	0.0591341	0.15941	0.250535	0.119158	0.149521	0.188649	0.0985711	0.169886	0.125094	0.126144	0.0593274	0.0742588	0.121024	0.161878	0.158334	0.183174	0.0921307	0.303779	0.339137	0.120592	0.132756	0.0966609	0.171974	0.183877
WC5-H8	0.165124	0.205137	0.263954	0.219264	0.168349	0.0941084	0.160227	0.175834	0.324117	0.178391	0.158087	0.148884	0.209314	0.218259	0.126601	0.203788	0.0723194	0.0994545	0.0818534	0.195665	0.398829	0.132325	0.130194	0.156608	0.130166	0.0727131	0.149224	0.298315	0.0824725	0.213468	0.276668	0.0733397	0.170249	0.203678	0.192515	0.119162	0.0878644	0.0740206	0.178227	0.236307	0.095893	0.162401	0.307549	0.408789	0.130131	0.210885	0.155862	0.0849465	0.263084
WT10-D3	0.0708581	0.0646718	0.1463	0.225188	0.114561	0.168354	0.118374	0.0945497	0.157363	0.274838	0.224793	0.186737	0.314278	0.288831	0.203936	0.127997	0.200329	0.203414	0.22033	0.115214	0.307271	0.214378	0.291217	0.234129	0.142908	0.149009	0.213839	0.212515	0.217016	0.124564	0.126857	0.152895	0.22836	0.11212	0.0894281	0.103049	0.13032	0.166642	0.216912	0.104604	0.234441	0.0643421	0.378726	0.28486	0.138327	0.109331	0.174281	0.230852	0.267626
WT3-D7	0.158883	0.118146	0.261001	0.307461	0.212176	0.258613	0.246111	0.119275	0.0800736	0.361539	0.297334	0.277101	0.400167	0.374366	0.331185	0.247106	0.278237	0.293804	0.30137	0.107556	0.366765	0.316732	0.376371	0.34979	0.178433	0.22159	0.288365	0.0881884	0.303142	0.186487	0.210319	0.241116	0.33754	0.190184	0.169761	0.168891	0.205604	0.271757	0.325979	0.0709713	0.337489	0.153581	0.454669	0.1554	0.213859	0.166739	0.252012	0.324184	0.332963
CS1-D3	0.144312	0.20558	0.219199	0.203404	0.1155	0.0652978	0.0933424	0.194577	0.288011	0.150455	0.224255	0.1991	0.178008	0.162195	0.0704888	0.168295	0.118025	0.138948	0.165049	0.244349	0.380086	0.145455	0.186491	0.131726	0.204024	0.113061	0.0804524	0.34651	0.110042	0.19433	0.248845	0.125174	0.133286	0.178719	0.170718	0.149557	0.156035	0.0933769	0.198901	0.251322	0.115268	0.153738	0.239259	0.428266	0.194659	0.204083	0.135808	0.124014	0.237585
CS3-D3	0.121497	0.148914	0.182872	0.238898	0.146408	0.156982	0.11238	0.158517	0.22119	0.258734	0.197134	0.165278	0.289587	0.293707	0.170236	0.133018	0.156564	0.171114	0.181675	0.153753	0.364856	0.180462	0.244854	0.158023	0.161111	0.131553	0.18109	0.26213	0.183384	0.107278	0.202474	0.0911756	0.135234	0.0922012	0.128191	0.116959	0.112211	0.0983122	0.177624	0.199293	0.173855	0.087612	0.324995	0.364534	0.116154	0.171376	0.179252	0.182964	0.28373
CS5-D3	0.176356	0.245906	0.256445	0.213871	0.164323	0.081124	0.139804	0.222935	0.347748	0.130511	0.206481	0.187378	0.130345	0.135236	0.0640631	0.203808	0.0819473	0.130043	0.133969	0.244862	0.403874	0.138615	0.132449	0.135086	0.200205	0.126019	0.0975203	0.355657	0.0543906	0.254173	0.273629	0.145165	0.13479	0.225569	0.224312	0.160909	0.152157	0.117094	0.198127	0.280343	0.0951272	0.202739	0.225625	0.454368	0.204394	0.243363	0.152015	0.092178	0.252234
CS6-H0	0.0788404	0.131419	0.210291	0.156905	0.0845978	0.111163	0.117234	0.0973207	0.251576	0.19631	0.140637	0.124089	0.228536	0.247235	0.145929	0.152676	0.0863944	0.124877	0.114956	0.131327	0.341951	0.145201	0.21367	0.196207	0.0828274	0.057793	0.155334	0.233633	0.126356	0.168923	0.222047	0.08423	0.177939	0.153429	0.138136	0.0361736	0.0502647	0.0996129	0.179989	0.169989	0.161797	0.106495	0.335072	0.338894	0.117073	0.133928	0.133277	0.143645	0.210354
TS2-H0	0.202676	0.159328	0.276844	0.350035	0.25724	0.276934	0.25745	0.165987	0.061679	0.403797	0.337826	0.316753	0.440931	0.407148	0.342074	0.279147	0.3196	0.33437	0.342101	0.150861	0.406253	0.338951	0.400336	0.326536	0.220047	0.249784	0.27758	0.173468	0.332649	0.148218	0.236203	0.243512	0.310903	0.158909	0.152426	0.211783	0.245195	0.262251	0.334873	0.082935	0.342557	0.150773	0.410077	0.213032	0.219892	0.210745	0.250175	0.352967	0.368871
TS8-H0	0.102737	0.0621696	0.200203	0.25207	0.1642	0.206511	0.183259	0.071896	0.12307	0.308205	0.248732	0.222455	0.355085	0.329233	0.267576	0.185999	0.22121	0.248595	0.238263	0.0743816	0.337143	0.259577	0.325444	0.28791	0.13545	0.16692	0.240097	0.145707	0.246998	0.151207	0.154435	0.18001	0.274737	0.14474	0.116423	0.109092	0.143122	0.204862	0.269149	0.0480504	0.275671	0.0904341	0.418162	0.221267	0.16305	0.125463	0.214152	0.26225	0.29639
WC4-D5	0.172932	0.217015	0.227486	0.251797	0.190785	0.124304	0.137158	0.203185	0.305831	0.176845	0.252067	0.222497	0.235149	0.228101	0.118149	0.184184	0.173711	0.174623	0.218195	0.24655	0.40214	0.16755	0.194792	0.126309	0.218605	0.146909	0.134004	0.342455	0.150121	0.140225	0.256253	0.132897	0.0852057	0.134541	0.188263	0.168934	0.160505	0.117102	0.211099	0.261002	0.149826	0.152484	0.242017	0.433374	0.187473	0.201083	0.191482	0.161053	0.307159
WT2-D3	0.0994834	0.138784	0.207442	0.204121	0.112241	0.141459	0.139542	0.100807	0.203085	0.249502	0.215141	0.187258	0.290506	0.256589	0.20927	0.167825	0.175395	0.200211	0.206921	0.158644	0.315836	0.204252	0.27176	0.254381	0.131357	0.106204	0.168168	0.254268	0.176288	0.138354	0.217477	0.139744	0.236253	0.133783	0.0852019	0.0828405	0.103836	0.171667	0.22474	0.1085	0.240547	0.101103	0.320162	0.317241	0.134664	0.113604	0.104984	0.216282	0.222691
WT7-H0	0.269621	0.321512	0.349755	0.309296	0.261085	0.143247	0.233074	0.286477	0.399753	0.167537	0.281505	0.274717	0.186195	0.141968	0.121042	0.304467	0.14784	0.201554	0.19578	0.313085	0.487191	0.220517	0.141722	0.151469	0.245673	0.176218	0.130761	0.412165	0.113467	0.271201	0.374615	0.168862	0.145713	0.259846	0.266629	0.232723	0.209844	0.143361	0.257696	0.343437	0.116586	0.24797	0.173131	0.519714	0.237821	0.319603	0.24052	0.150701	0.342734
CS2-H8	0.152947	0.164915	0.18453	0.232983	0.15469	0.146593	0.0902493	0.176369	0.239403	0.254522	0.227549	0.218473	0.257145	0.223841	0.177059	0.150657	0.200136	0.156195	0.232748	0.204678	0.303492	0.177374	0.279009	0.155443	0.215109	0.13682	0.167381	0.307058	0.187932	0.0962569	0.207848	0.142051	0.162109	0.0779006	0.113647	0.165423	0.174321	0.150739	0.175955	0.186645	0.221906	0.114079	0.266309	0.369343	0.177555	0.17255	0.129418	0.2438	0.245784
CS9-D3	0.0588351	0.111738	0.147977	0.131659	0.0695215	0.144057	0.0661303	0.097383	0.253519	0.213174	0.152449	0.123628	0.212919	0.215681	0.172073	0.128834	0.145875	0.120079	0.186403	0.151407	0.263147	0.159611	0.270766	0.181116	0.120468	0.116998	0.198033	0.255226	0.174565	0.179225	0.161443	0.148031	0.207753	0.159695	0.151179	0.0746895	0.106648	0.16699	0.173695	0.174349	0.224707	0.118546	0.327162	0.342692	0.142629	0.103991	0.115199	0.215889	0.180252
CS9-H0	0.210438	0.269982	0.227659	0.197958	0.176026	0.109435	0.139027	0.245291	0.32839	0.206736	0.213822	0.228295	0.158087	0.153543	0.132209	0.23979	0.186406	0.168565	0.240213	0.29788	0.328231	0.134065	0.232923	0.148926	0.259072	0.162116	0.0982991	0.399198	0.142797	0.212038	0.261722	0.184895	0.167167	0.19359	0.200621	0.214835	0.222088	0.155467	0.176488	0.276857	0.174682	0.208677	0.171966	0.454654	0.246438	0.24934	0.121701	0.201642	0.182399
TS8-H8	0.164401	0.11559	0.257908	0.312513	0.220967	0.259477	0.247739	0.122467	0.0950762	0.364876	0.297623	0.275109	0.404447	0.380963	0.329725	0.242462	0.281486	0.292882	0.298641	0.0985312	0.385395	0.313654	0.368454	0.34788	0.173248	0.207957	0.303273	0.0977766	0.296812	0.195607	0.207968	0.234876	0.336688	0.198884	0.177877	0.168157	0.202551	0.268716	0.322621	0.0798406	0.336237	0.14871	0.466717	0.171426	0.202166	0.178138	0.263549	0.319408	0.352654
WC2-H8	0.163571	0.233711	0.242891	0.207233	0.136689	0.0709433	0.121892	0.209291	0.280517	0.164265	0.243773	0.207599	0.208616	0.168283	0.0926175	0.184098	0.125582	0.173531	0.174802	0.266619	0.38521	0.156188	0.20045	0.184487	0.223112	0.133898	0.0740934	0.364841	0.108304	0.196933	0.265386	0.150415	0.173409	0.17588	0.163266	0.169665	0.166829	0.125855	0.22597	0.231979	0.143643	0.183229	0.222909	0.419163	0.213639	0.195248	0.110618	0.126587	0.223563
WC7-D3	0.131027	0.168448	0.21623	0.21692	0.142157	0.10351	0.102467	0.139012	0.247427	0.216433	0.160846	0.14733	0.248901	0.253565	0.138594	0.170562	0.0988886	0.117511	0.119439	0.160366	0.377758	0.138857	0.190956	0.133683	0.108501	0.0738614	0.136539	0.268912	0.118534	0.143898	0.23841	0.0256511	0.126389	0.128663	0.12627	0.0804816	0.0652143	0.0495672	0.135716	0.196035	0.121742	0.0944048	0.306555	0.374492	0.0972007	0.182646	0.141512	0.133208	0.260182
WC7-D7	0.234237	0.217502	0.121927	0.161216	0.25144	0.260669	0.17773	0.259194	0.318906	0.353962	0.192868	0.236995	0.252463	0.326686	0.284843	0.219152	0.309514	0.234559	0.341536	0.273778	0.23614	0.209173	0.373588	0.231455	0.284339	0.246222	0.298091	0.352474	0.302811	0.197505	0.141214	0.244482	0.263493	0.178104	0.223496	0.248725	0.266709	0.255593	0.131604	0.278751	0.321355	0.191915	0.323595	0.412934	0.247253	0.267591	0.226736	0.344665	0.192498
WC9-D3	0.186025	0.239979	0.251829	0.227512	0.183123	0.0976245	0.149368	0.214185	0.309485	0.15682	0.217785	0.178499	0.208819	0.213778	0.0749165	0.202236	0.103393	0.1509	0.134096	0.239826	0.437223	0.141244	0.141808	0.117205	0.182743	0.122511	0.0846305	0.344783	0.0886813	0.207665	0.276684	0.0937457	0.112541	0.192294	0.193972	0.149637	0.116609	0.0589366	0.201575	0.273141	0.0803483	0.170779	0.258365	0.445954	0.175568	0.223084	0.187029	0.0796447	0.292193
WT3-D3	0.0789458	0.0950584	0.152413	0.208461	0.133015	0.146021	0.12843	0.0825308	0.190159	0.252931	0.175709	0.146813	0.291418	0.296125	0.178839	0.14818	0.151332	0.17633	0.171185	0.097543	0.32976	0.174587	0.242998	0.19838	0.0913511	0.10741	0.192691	0.200191	0.171774	0.140742	0.170327	0.0850177	0.184422	0.127178	0.0977015	0.0503141	0.0722596	0.117767	0.182706	0.130804	0.183068	0.0444245	0.367885	0.306059	0.0761921	0.112806	0.173188	0.180378	0.26566
WT5-D3	0.107946	0.0977888	0.167362	0.24128	0.155423	0.167829	0.144739	0.105507	0.178437	0.27616	0.200474	0.180367	0.307535	0.312781	0.200438	0.157148	0.182037	0.195559	0.199813	0.101638	0.34015	0.196655	0.260467	0.204373	0.117342	0.121577	0.200031	0.197677	0.200015	0.114871	0.174478	0.102382	0.195648	0.110197	0.0737515	0.0805879	0.103372	0.127284	0.198211	0.13169	0.200332	0.03637	0.368671	0.302138	0.0977258	0.139988	0.189741	0.213819	0.286215
WT8-D7	0.276872	0.241659	0.19477	0.248231	0.322863	0.349221	0.279649	0.260589	0.151025	0.474107	0.272385	0.307926	0.380318	0.43347	0.397811	0.331938	0.395541	0.354569	0.420126	0.234819	0.298861	0.308985	0.47144	0.378967	0.321493	0.334554	0.378515	0.244389	0.391139	0.257212	0.149739	0.32888	0.399152	0.257138	0.247415	0.301379	0.323831	0.356245	0.228737	0.191694	0.420003	0.236944	0.437267	0.266573	0.300641	0.29067	0.284586	0.430164	0.258478
WT9-H0	0.199375	0.251316	0.224371	0.224741	0.194216	0.139776	0.118329	0.243213	0.331889	0.204224	0.185976	0.171596	0.180911	0.192329	0.101854	0.213208	0.153792	0.112229	0.184534	0.254655	0.383701	0.129058	0.188548	0.0578462	0.211753	0.15016	0.144537	0.371608	0.115193	0.208763	0.25451	0.123255	0.0871363	0.183998	0.21489	0.177456	0.154035	0.08821	0.145856	0.298233	0.119107	0.183889	0.230851	0.467294	0.196656	0.25824	0.16402	0.155508	0.265188
CS2-D3	0.165187	0.227074	0.27584	0.210883	0.154765	0.0659443	0.158214	0.196387	0.337929	0.113919	0.22243	0.208597	0.135262	0.129805	0.0883131	0.215523	0.0767639	0.153732	0.133684	0.241057	0.408718	0.166465	0.144405	0.176075	0.194564	0.110045	0.0807551	0.335507	0.0737673	0.247391	0.290389	0.150808	0.162823	0.223256	0.214271	0.141062	0.14766	0.1303	0.234652	0.259489	0.115883	0.188039	0.226995	0.430046	0.210429	0.226645	0.155864	0.10255	0.247598
CS4-D3	0.136736	0.19489	0.248611	0.190254	0.131685	0.0291198	0.130284	0.162607	0.311379	0.133871	0.197801	0.19414	0.154731	0.149785	0.0944638	0.187814	0.0727821	0.116731	0.127	0.208076	0.36937	0.133464	0.164175	0.175469	0.163831	0.0681368	0.0938662	0.306899	0.0633773	0.206953	0.262417	0.128692	0.165945	0.185132	0.179731	0.12183	0.130404	0.116197	0.196799	0.220892	0.127571	0.152137	0.239986	0.400476	0.178551	0.198783	0.11363	0.116595	0.218168
CS6-D7	0.0818248	0.145913	0.173167	0.111486	0.0730717	0.112695	0.0881832	0.108839	0.26452	0.196671	0.134422	0.113265	0.203604	0.211023	0.156659	0.149099	0.118141	0.122327	0.149041	0.159231	0.295005	0.136158	0.250877	0.193125	0.117913	0.0869261	0.169764	0.260659	0.139021	0.185925	0.18569	0.128971	0.193893	0.156009	0.15243	0.0758779	0.0904572	0.140085	0.176004	0.187173	0.199421	0.11731	0.30391	0.357575	0.15203	0.134803	0.100489	0.18504	0.159388
WT2-H8	0.166614	0.229607	0.193875	0.148102	0.16364	0.1216	0.12286	0.209787	0.355344	0.191484	0.142556	0.137343	0.129434	0.191414	0.128822	0.20797	0.116869	0.102548	0.16644	0.241619	0.320918	0.0920811	0.219642	0.159108	0.201877	0.132946	0.174669	0.344784	0.123069	0.256292	0.210365	0.16443	0.179292	0.22753	0.23493	0.150728	0.157221	0.146083	0.14174	0.280022	0.167978	0.207388	0.246471	0.443945	0.223828	0.230063	0.144575	0.163159	0.191303
WT5-H0	0.197891	0.201829	0.234959	0.30132	0.212055	0.17369	0.155716	0.226899	0.287444	0.227398	0.293637	0.255977	0.277924	0.269807	0.153937	0.183988	0.213421	0.214763	0.234453	0.248607	0.416537	0.225474	0.24951	0.1563	0.255151	0.183304	0.164153	0.341952	0.198191	0.126902	0.259794	0.157576	0.0980967	0.1359	0.18301	0.194001	0.191349	0.130847	0.251888	0.263025	0.178387	0.157629	0.286542	0.4293	0.220836	0.225889	0.240186	0.193418	0.351391
CS11-D7	0.129191	0.183681	0.200631	0.17276	0.108082	0.13985	0.119162	0.171562	0.296788	0.172537	0.199424	0.153509	0.254454	0.230392	0.164544	0.125289	0.155711	0.162352	0.192052	0.217896	0.357407	0.138189	0.23364	0.227093	0.183783	0.124412	0.180732	0.316897	0.168752	0.202123	0.219489	0.147464	0.224661	0.182738	0.187251	0.134396	0.122099	0.165847	0.21807	0.227505	0.213218	0.16827	0.334066	0.387516	0.191613	0.121337	0.129562	0.174492	0.221943
CS5-D7	0.20695	0.266711	0.316862	0.248262	0.199086	0.129212	0.203008	0.22996	0.396555	0.140242	0.185216	0.197065	0.158733	0.172118	0.119211	0.257379	0.0829216	0.135005	0.0881144	0.255456	0.425411	0.186845	0.0960475	0.165694	0.196113	0.155634	0.158895	0.364715	0.0898762	0.290037	0.330956	0.156065	0.180227	0.266038	0.268334	0.188639	0.17106	0.147407	0.23679	0.312553	0.0749343	0.239575	0.286696	0.476766	0.184001	0.26068	0.214446	0.0855207	0.284988
CS8-D7	0.257539	0.319408	0.272346	0.188126	0.236439	0.160392	0.214555	0.273613	0.443191	0.179258	0.163748	0.186741	0.0845665	0.152637	0.156838	0.302221	0.127494	0.143359	0.168832	0.2972	0.360381	0.146451	0.180616	0.172559	0.236155	0.194618	0.191827	0.402418	0.113677	0.340958	0.289137	0.206474	0.214014	0.310522	0.310905	0.235986	0.218971	0.192314	0.17929	0.35558	0.163301	0.285999	0.221652	0.517772	0.261414	0.310303	0.206237	0.162177	0.212327
TS1-D7	0.404586	0.469206	0.515237	0.43908	0.391731	0.297362	0.403132	0.429351	0.587426	0.301829	0.38059	0.391918	0.300873	0.244831	0.293639	0.455726	0.271204	0.334078	0.285644	0.449119	0.603996	0.379493	0.24743	0.344534	0.392658	0.34018	0.310534	0.557077	0.265106	0.48983	0.535765	0.347916	0.348357	0.462636	0.457527	0.37968	0.363617	0.338446	0.423964	0.498422	0.257354	0.429737	0.309026	0.65414	0.369517	0.467849	0.38525	0.274266	0.457189
TS1-H0	0.127328	0.117129	0.251852	0.280643	0.164075	0.263017	0.219785	0.106187	0.123267	0.328594	0.309802	0.270813	0.383704	0.367095	0.309038	0.227867	0.261827	0.28789	0.265116	0.117214	0.342451	0.317189	0.384778	0.351549	0.162328	0.216314	0.27519	0.149998	0.305983	0.202841	0.206142	0.250455	0.337655	0.210778	0.141831	0.163442	0.206734	0.266527	0.332713	0.0735327	0.333081	0.16644	0.4456	0.23699	0.231641	0.134515	0.228141	0.315882	0.29958
TS4-D7	0.0773472	0.13566	0.216675	0.170371	0.0721236	0.143209	0.150103	0.0852534	0.21961	0.224414	0.203575	0.180787	0.271773	0.254708	0.211005	0.184564	0.152452	0.194137	0.177252	0.154371	0.304114	0.21312	0.282744	0.270489	0.0947525	0.118508	0.155268	0.239112	0.195103	0.177754	0.23128	0.157069	0.249398	0.172045	0.1265	0.0747282	0.113866	0.172674	0.251118	0.139444	0.236867	0.132489	0.330565	0.305918	0.159663	0.0958119	0.124588	0.21563	0.183777
WC10-D5	0.0633828	0.0963139	0.132615	0.186179	0.109945	0.145657	0.109832	0.0824115	0.187492	0.234219	0.207983	0.153994	0.3022	0.27845	0.178833	0.117327	0.177313	0.199195	0.200141	0.135561	0.313124	0.177351	0.250702	0.225896	0.124357	0.124173	0.180637	0.229616	0.194196	0.133053	0.151903	0.118549	0.211026	0.127088	0.0931012	0.070581	0.0903098	0.143175	0.210286	0.128818	0.205658	0.0656918	0.358601	0.304851	0.109208	0.0781767	0.156279	0.184738	0.2478
WT6-H8	0.156503	0.212185	0.211145	0.194072	0.150056	0.0874031	0.0857295	0.199702	0.296805	0.166014	0.208301	0.195161	0.172083	0.157156	0.0809125	0.179158	0.141376	0.127172	0.188941	0.250642	0.359642	0.13127	0.195872	0.0938505	0.216072	0.121994	0.0976186	0.355245	0.104355	0.191603	0.234891	0.129523	0.109537	0.162306	0.172912	0.15522	0.161848	0.103955	0.170633	0.254562	0.124334	0.156266	0.223322	0.434465	0.20079	0.215119	0.131983	0.155297	0.235138
WT8-H0	0.180357	0.237062	0.253227	0.257297	0.190069	0.128699	0.14183	0.218359	0.295982	0.223113	0.208839	0.177614	0.243495	0.249691	0.123196	0.203841	0.136773	0.155499	0.168885	0.227876	0.424074	0.171752	0.197535	0.099912	0.188123	0.149585	0.136657	0.340334	0.126051	0.173253	0.276492	0.0959221	0.068539	0.136234	0.201986	0.156542	0.133354	0.0643333	0.187453	0.274279	0.121381	0.159891	0.252867	0.439586	0.162318	0.242911	0.198982	0.130126	0.309091
TS6-H0	0.287459	0.277262	0.322848	0.360706	0.302303	0.230884	0.255941	0.29131	0.33865	0.287565	0.359773	0.336923	0.335274	0.293922	0.228069	0.279421	0.292606	0.298081	0.317231	0.308084	0.47719	0.290382	0.290878	0.224571	0.323273	0.245757	0.217122	0.38622	0.245792	0.169442	0.326854	0.236038	0.146155	0.171976	0.233256	0.278138	0.262922	0.223933	0.317692	0.29149	0.248722	0.220807	0.279702	0.459839	0.281557	0.30275	0.294493	0.273781	0.401229
TS7-H8	0.243747	0.300963	0.236466	0.166892	0.20054	0.151556	0.192649	0.274482	0.389459	0.213508	0.195509	0.244313	0.0985634	0.150821	0.185865	0.285473	0.190249	0.179149	0.235961	0.325267	0.29457	0.15786	0.268997	0.232755	0.281713	0.196086	0.165446	0.42277	0.163076	0.290325	0.252658	0.26197	0.266464	0.278774	0.257892	0.252159	0.257556	0.241437	0.178336	0.300829	0.236398	0.284929	0.17856	0.488078	0.313801	0.274006	0.132001	0.233727	0.145675
CS3-H8	0.152725	0.211397	0.253673	0.186074	0.151405	0.0911913	0.13865	0.173669	0.330599	0.174867	0.132394	0.129192	0.178963	0.201812	0.126558	0.200503	0.0439805	0.0826162	0.0791658	0.191723	0.370578	0.125704	0.154995	0.156214	0.140025	0.103014	0.152659	0.305819	0.0758752	0.233757	0.265232	0.0945731	0.172655	0.198239	0.211197	0.123775	0.10863	0.102787	0.17427	0.247488	0.110882	0.173444	0.288984	0.412871	0.143949	0.214511	0.146209	0.0987334	0.228492
CS9-D5	0.194101	0.2366	0.275142	0.246599	0.193853	0.0798838	0.159776	0.207271	0.320964	0.173665	0.168696	0.171658	0.205749	0.21066	0.0956628	0.229062	0.0758575	0.127541	0.090191	0.229846	0.432663	0.156674	0.114464	0.129404	0.169407	0.117409	0.106033	0.33647	0.082052	0.220331	0.298901	0.0789883	0.138414	0.203546	0.199971	0.14814	0.129483	0.0725062	0.193865	0.264876	0.0473247	0.16634	0.272862	0.439042	0.128572	0.248378	0.183057	0.0585362	0.28918
TS4-H0	0.117284	0.150094	0.164758	0.171651	0.129292	0.116809	0.0547848	0.147564	0.284741	0.202896	0.154502	0.145625	0.18464	0.185852	0.146323	0.127667	0.148866	0.086309	0.186569	0.18197	0.284567	0.114798	0.22841	0.135864	0.155606	0.0841264	0.189882	0.2847	0.139503	0.172352	0.181451	0.118349	0.176826	0.149642	0.161385	0.108925	0.123417	0.140532	0.123791	0.202744	0.195329	0.12571	0.291424	0.384713	0.146423	0.163908	0.0937998	0.19347	0.208411
WC8-D5	0.11116	0.142854	0.142644	0.194852	0.129368	0.183426	0.097179	0.141815	0.18609	0.305336	0.201255	0.155206	0.301103	0.277809	0.218537	0.1393	0.217067	0.201493	0.244279	0.164624	0.302472	0.197493	0.322956	0.189963	0.182543	0.178073	0.194684	0.269996	0.225348	0.129466	0.155774	0.159361	0.197501	0.0957833	0.109901	0.118659	0.155237	0.160426	0.200897	0.160831	0.24761	0.079594	0.308646	0.336365	0.154475	0.158765	0.155451	0.246483	0.241602
TS9-H0	0.182195	0.243622	0.267135	0.21947	0.156861	0.0635765	0.134422	0.204227	0.29157	0.180488	0.234915	0.235021	0.190704	0.15338	0.107522	0.215914	0.140302	0.16046	0.196352	0.259283	0.378044	0.164104	0.203442	0.148489	0.21304	0.11919	0.0554803	0.356218	0.0974014	0.180973	0.28995	0.145907	0.135603	0.146734	0.168222	0.173615	0.184323	0.124383	0.215117	0.236649	0.145831	0.16865	0.18563	0.417823	0.201019	0.221362	0.106607	0.16013	0.222103
WC2-D3	0.408693	0.382842	0.509807	0.55095	0.430254	0.542858	0.497761	0.392028	0.277623	0.603378	0.567016	0.517065	0.657853	0.642849	0.584294	0.470572	0.538044	0.563679	0.534228	0.381653	0.610067	0.585559	0.642091	0.609597	0.441597	0.509755	0.553637	0.273919	0.586634	0.453184	0.461763	0.518108	0.603536	0.467953	0.426316	0.444247	0.476448	0.531003	0.598681	0.338733	0.600045	0.436187	0.713969	0.219251	0.48683	0.411263	0.502255	0.576398	0.572856
WC9-H8	0.149387	0.194973	0.232449	0.221656	0.157229	0.102707	0.116526	0.163356	0.268314	0.190085	0.189237	0.179361	0.223493	0.22842	0.112176	0.190268	0.124903	0.142959	0.135309	0.194998	0.387105	0.139928	0.187855	0.125601	0.150258	0.0832275	0.117264	0.294483	0.115371	0.165473	0.256426	0.0622398	0.109993	0.149967	0.133782	0.101168	0.0953326	0.0584582	0.161756	0.219711	0.116978	0.115269	0.27845	0.396389	0.140033	0.205212	0.15579	0.141964	0.267298
WT9-H8	0.218662	0.211035	0.276443	0.321453	0.231295	0.21986	0.208606	0.231571	0.220666	0.308712	0.310737	0.301327	0.345347	0.311482	0.24768	0.245613	0.276283	0.271188	0.280639	0.256791	0.400933	0.275356	0.315074	0.230478	0.267652	0.202752	0.205374	0.310347	0.257368	0.0627241	0.279775	0.203169	0.175991	0.0963078	0.130674	0.219507	0.219316	0.194722	0.272663	0.193636	0.252912	0.163976	0.286435	0.363353	0.233562	0.240028	0.217777	0.289084	0.330559
TS3-H8	0.255224	0.224128	0.333551	0.411512	0.30602	0.354122	0.314598	0.233541	0.0828774	0.469533	0.40524	0.365733	0.518098	0.482793	0.402606	0.324135	0.38417	0.409997	0.402148	0.219309	0.482627	0.413452	0.472764	0.429343	0.295564	0.335397	0.360396	0.140566	0.413796	0.261418	0.291263	0.318723	0.413906	0.271837	0.230592	0.274476	0.307633	0.340189	0.416848	0.15758	0.412824	0.237421	0.529241	0.123058	0.290268	0.265859	0.32733	0.403441	0.436993
WT6-H0	0.12407	0.117332	0.189829	0.27595	0.155119	0.232277	0.17422	0.141532	0.129885	0.320596	0.292425	0.233263	0.380086	0.346122	0.249901	0.1682	0.260052	0.277435	0.282077	0.169843	0.348232	0.268934	0.335233	0.272983	0.188303	0.211434	0.217662	0.240764	0.280955	0.110375	0.177747	0.192014	0.264164	0.125603	0.0961363	0.152618	0.177214	0.196869	0.282826	0.110498	0.274553	0.109431	0.380627	0.292035	0.191014	0.123897	0.206523	0.271782	0.308314
TS1-D5	0.235271	0.225071	0.268458	0.320479	0.258007	0.187945	0.208374	0.245917	0.304466	0.26247	0.284289	0.264949	0.304429	0.306508	0.185308	0.229713	0.219481	0.222562	0.24615	0.235167	0.447381	0.218186	0.248097	0.180771	0.255894	0.183637	0.203873	0.324493	0.187921	0.129997	0.276211	0.1618	0.106193	0.138895	0.193336	0.210116	0.195198	0.149354	0.251178	0.261	0.19712	0.165075	0.304015	0.426491	0.209282	0.26361	0.256203	0.216656	0.366177
WC8-H8	0.258412	0.318302	0.300357	0.258414	0.227843	0.160599	0.175362	0.29655	0.374233	0.217839	0.281572	0.274635	0.195679	0.136808	0.149325	0.285808	0.225574	0.211645	0.274581	0.349194	0.41304	0.197142	0.254838	0.145392	0.311456	0.209997	0.126149	0.453044	0.181582	0.207316	0.326898	0.225621	0.113506	0.19159	0.246396	0.255962	0.26018	0.192376	0.244685	0.329258	0.193253	0.254571	0.114844	0.507713	0.298232	0.301755	0.167187	0.240571	0.254572
WC1-D3	0.19024	0.255612	0.291859	0.219355	0.16171	0.0980245	0.168218	0.226812	0.34402	0.134323	0.249402	0.234771	0.148038	0.0980482	0.10677	0.229362	0.124871	0.178739	0.178362	0.284309	0.393731	0.188891	0.176366	0.195107	0.243164	0.15367	0.0734302	0.385071	0.0950947	0.25238	0.305492	0.198319	0.181604	0.220512	0.21932	0.187792	0.191526	0.177721	0.261538	0.266146	0.150012	0.230567	0.193521	0.439801	0.262528	0.227046	0.140982	0.14727	0.228399
TS5-D3	0.0783118	0.11092	0.181627	0.206204	0.103565	0.129019	0.117304	0.0743753	0.193551	0.251464	0.205042	0.184465	0.286651	0.252229	0.199852	0.15588	0.165746	0.189341	0.195663	0.133966	0.297397	0.19432	0.263561	0.232831	0.114218	0.0961632	0.159579	0.229916	0.177558	0.119031	0.193677	0.12413	0.215963	0.112963	0.0668509	0.0714125	0.0997039	0.149881	0.202884	0.106115	0.220971	0.0672655	0.327031	0.293368	0.111398	0.100643	0.122304	0.211229	0.226005
TS9-D5	0.0939149	0.147396	0.192522	0.196681	0.0996313	0.122832	0.0994327	0.115464	0.180829	0.250261	0.205632	0.183878	0.287056	0.2517	0.181253	0.154597	0.161227	0.197957	0.208937	0.177017	0.324922	0.197662	0.276468	0.206027	0.157688	0.122195	0.125294	0.274969	0.185662	0.104031	0.213683	0.114455	0.184606	0.0903964	0.0765861	0.0968388	0.122584	0.132253	0.205284	0.134535	0.207154	0.0781707	0.282365	0.332471	0.120744	0.127993	0.106724	0.211709	0.208736
CS1-D5	0.100443	0.120227	0.192528	0.198763	0.10822	0.109312	0.0829687	0.124675	0.267176	0.173865	0.170973	0.158844	0.204572	0.214301	0.130514	0.115256	0.119278	0.0959527	0.147887	0.160803	0.316482	0.139851	0.200322	0.14767	0.124815	0.0632271	0.167178	0.257066	0.133007	0.153719	0.210464	0.0852179	0.165605	0.151134	0.141474	0.0781804	0.0874357	0.109577	0.156403	0.180889	0.161691	0.110447	0.331179	0.360249	0.122636	0.139723	0.128651	0.155924	0.236038
TS5-D5	0.150566	0.111944	0.191482	0.283155	0.188881	0.271719	0.18224	0.163494	0.187225	0.321988	0.282298	0.233767	0.354665	0.339498	0.288778	0.133253	0.29183	0.244866	0.319368	0.169896	0.321885	0.278211	0.373565	0.269756	0.222168	0.253944	0.318147	0.227573	0.306211	0.220993	0.162679	0.256678	0.319069	0.211147	0.19367	0.195869	0.227033	0.269726	0.296215	0.171078	0.334737	0.169146	0.453674	0.268357	0.228048	0.177057	0.251027	0.316189	0.330014
TS7-H0	0.165108	0.123	0.206114	0.277084	0.182905	0.181337	0.139219	0.180228	0.220456	0.245941	0.252111	0.235886	0.306528	0.299178	0.209574	0.138559	0.215911	0.187869	0.234064	0.192828	0.35143	0.227255	0.285828	0.170702	0.211064	0.153417	0.20694	0.259964	0.233319	0.0777755	0.21671	0.135866	0.1903	0.0877657	0.130894	0.159802	0.160751	0.15373	0.226275	0.189313	0.22551	0.107002	0.349583	0.346589	0.167599	0.187282	0.208621	0.243728	0.313779
WC6-H8	0.24466	0.311137	0.29256	0.250809	0.214949	0.136753	0.182638	0.287595	0.351651	0.132835	0.298446	0.259185	0.184644	0.126735	0.101708	0.237473	0.183588	0.225412	0.228683	0.341329	0.433928	0.184193	0.18759	0.183242	0.302906	0.200908	0.0984466	0.444578	0.130997	0.261883	0.321625	0.21372	0.173946	0.238302	0.22847	0.243979	0.233781	0.187376	0.270269	0.309419	0.157489	0.248465	0.167359	0.496446	0.289806	0.248957	0.173676	0.162517	0.271629
TS10-D5	0.150901	0.194901	0.272448	0.205719	0.121122	0.0949452	0.143603	0.154759	0.267209	0.204605	0.220666	0.215083	0.233484	0.195059	0.173784	0.205076	0.132094	0.162112	0.161701	0.218001	0.362634	0.179846	0.236453	0.24309	0.160126	0.07646	0.108775	0.305955	0.14173	0.180579	0.284207	0.138506	0.22763	0.174556	0.139245	0.126163	0.139377	0.158935	0.229429	0.171309	0.199017	0.168674	0.257552	0.372694	0.1883	0.177431	0.0705136	0.18172	0.200986
CS4-H0	0.0643297	0.0899165	0.18976	0.213932	0.107821	0.187356	0.154609	0.0695014	0.170441	0.267208	0.23494	0.204421	0.310857	0.294105	0.239079	0.172588	0.185422	0.219632	0.219427	0.118372	0.288376	0.241828	0.31111	0.279456	0.116218	0.145721	0.200035	0.213389	0.231659	0.149115	0.187822	0.177091	0.260629	0.147765	0.0851632	0.0877257	0.132643	0.198242	0.26	0.0897347	0.260225	0.104068	0.3679	0.275418	0.158165	0.0748051	0.152242	0.248991	0.231183
TS9-D7	0.24607	0.208015	0.349915	0.39247	0.293886	0.352555	0.340734	0.21119	0.123198	0.44722	0.385862	0.366561	0.483619	0.466419	0.42586	0.334033	0.362644	0.376348	0.393296	0.183046	0.447322	0.409579	0.466151	0.445525	0.255488	0.31154	0.38742	0.114503	0.394335	0.27747	0.301653	0.341466	0.432036	0.283288	0.254315	0.268496	0.306471	0.375945	0.420387	0.153284	0.438258	0.248338	0.532376	0.100113	0.294254	0.249243	0.325882	0.421009	0.410641
WT2-D5	0.124233	0.155581	0.206564	0.235701	0.128348	0.136233	0.11	0.137321	0.198749	0.250501	0.238056	0.220803	0.289373	0.255049	0.186026	0.164274	0.179191	0.198052	0.209728	0.193052	0.333591	0.197401	0.26901	0.194858	0.183423	0.114938	0.13018	0.287791	0.192891	0.0773881	0.226371	0.114719	0.186353	0.0841943	0.0642135	0.124487	0.134129	0.126485	0.199805	0.142296	0.203542	0.0939671	0.283848	0.346098	0.153291	0.146144	0.117336	0.220993	0.237482
TS8-D5	0.202716	0.180936	0.270746	0.291381	0.242706	0.3077	0.254819	0.16364	0.129981	0.398037	0.308426	0.288649	0.389732	0.383023	0.374865	0.292435	0.321916	0.294439	0.349908	0.155573	0.346083	0.324711	0.443832	0.372014	0.216336	0.278074	0.347494	0.124526	0.337462	0.243621	0.221964	0.314127	0.380141	0.23769	0.212187	0.230005	0.276302	0.344219	0.334408	0.107705	0.408799	0.216353	0.438768	0.208512	0.272934	0.209963	0.219984	0.392085	0.309893
WT2-H0	0.102888	0.0861196	0.208919	0.265031	0.131792	0.231263	0.178423	0.103587	0.139823	0.311237	0.27792	0.230519	0.357225	0.328243	0.265013	0.171183	0.24108	0.261435	0.263022	0.130358	0.323529	0.276673	0.345106	0.304456	0.170975	0.188657	0.242243	0.215108	0.270801	0.160175	0.165926	0.214843	0.298628	0.168791	0.106692	0.134231	0.172092	0.22417	0.28898	0.0758297	0.293894	0.130014	0.410286	0.265085	0.205366	0.120652	0.198587	0.277365	0.28694
WC1-H8	0.148195	0.172612	0.27611	0.273949	0.176761	0.240864	0.237826	0.110646	0.205612	0.327605	0.304809	0.280605	0.363254	0.348879	0.317254	0.267095	0.262635	0.290906	0.274054	0.157897	0.350257	0.308227	0.377919	0.354524	0.154304	0.214209	0.263304	0.206512	0.291412	0.250146	0.258661	0.250764	0.338213	0.246651	0.166626	0.16892	0.211281	0.274947	0.328807	0.128376	0.343724	0.192828	0.410362	0.222781	0.226395	0.161569	0.205577	0.324336	0.283103
WC3-D5	0.144905	0.110342	0.220455	0.290306	0.193346	0.223668	0.196201	0.120031	0.109759	0.351152	0.284341	0.262401	0.384442	0.349855	0.281924	0.217616	0.264312	0.27345	0.299728	0.131382	0.352849	0.284184	0.3599	0.274679	0.176731	0.21011	0.231425	0.193638	0.278933	0.1036	0.18426	0.202657	0.251381	0.105774	0.109578	0.164681	0.204407	0.219726	0.282728	0.0795661	0.296978	0.105204	0.361281	0.25546	0.178322	0.159347	0.204339	0.308614	0.307489
WT1-H0	0.114524	0.0897777	0.204457	0.260259	0.166792	0.206046	0.182163	0.0981543	0.117125	0.318335	0.264371	0.236501	0.364331	0.330634	0.266307	0.195163	0.232413	0.261278	0.251251	0.110407	0.333672	0.261933	0.334115	0.291664	0.160539	0.177805	0.221236	0.175988	0.256601	0.125673	0.172226	0.184544	0.274783	0.131638	0.086643	0.120121	0.155427	0.206359	0.273402	0.0484783	0.279813	0.0941861	0.391663	0.236854	0.171322	0.131548	0.191151	0.268196	0.284983
WT3-D5	0.209125	0.167431	0.257877	0.342226	0.258484	0.302767	0.264609	0.184779	0.0469365	0.393037	0.356841	0.29765	0.463939	0.430159	0.334538	0.252695	0.331887	0.356748	0.354273	0.165548	0.429947	0.333196	0.396089	0.361968	0.243692	0.278786	0.298222	0.176294	0.348911	0.191669	0.223541	0.255146	0.346407	0.203565	0.16449	0.222279	0.243338	0.280015	0.361153	0.103266	0.351013	0.174157	0.464861	0.201415	0.24318	0.186879	0.272048	0.336508	0.384346
WC7-H8	0.125523	0.130583	0.184399	0.242508	0.158583	0.17131	0.135068	0.148758	0.183065	0.282711	0.232042	0.191542	0.331702	0.31878	0.21068	0.148938	0.200335	0.227008	0.211743	0.162563	0.370139	0.221046	0.291514	0.207789	0.181492	0.155233	0.189299	0.248205	0.222879	0.0796881	0.186049	0.125356	0.170441	0.0642437	0.100868	0.119941	0.119251	0.130475	0.224782	0.163244	0.218657	0.0707092	0.330052	0.332615	0.141418	0.168879	0.201034	0.219307	0.300451
CS6-D5	0.0721084	0.126779	0.212995	0.182947	0.0894026	0.144554	0.154366	0.07052	0.205021	0.240533	0.20703	0.187252	0.272492	0.255763	0.225585	0.198188	0.170434	0.19521	0.19863	0.129421	0.282276	0.219218	0.293973	0.266921	0.0845418	0.126369	0.179195	0.219608	0.194359	0.177229	0.215702	0.164287	0.247129	0.166926	0.12069	0.0858712	0.124636	0.192055	0.238243	0.115129	0.257266	0.114904	0.324053	0.300436	0.150886	0.0917058	0.120579	0.241024	0.191482
WT11-D7	0.166753	0.151287	0.143232	0.205745	0.213605	0.248869	0.175638	0.157362	0.156315	0.370231	0.219038	0.210328	0.313807	0.33685	0.292151	0.234467	0.281832	0.268429	0.327144	0.16909	0.279107	0.222881	0.393465	0.295647	0.224951	0.24553	0.268164	0.248959	0.292393	0.184152	0.106449	0.23637	0.301173	0.168449	0.14065	0.192814	0.226463	0.264413	0.222244	0.105189	0.328103	0.145753	0.333303	0.306807	0.219685	0.188655	0.173039	0.328852	0.232035
WC2-D5	0.251349	0.219983	0.326965	0.409787	0.288893	0.355554	0.307794	0.240046	0.065997	0.464604	0.406321	0.355857	0.513957	0.479787	0.393861	0.302598	0.385641	0.407947	0.402399	0.22458	0.479646	0.40434	0.464583	0.391623	0.304801	0.333192	0.339719	0.195577	0.41083	0.211214	0.284316	0.308338	0.36762	0.22576	0.217777	0.274708	0.305732	0.315621	0.409888	0.162134	0.397987	0.227003	0.486854	0.190693	0.294532	0.261038	0.323095	0.401178	0.433913
WC9-D7	0.223242	0.17999	0.286762	0.365082	0.276425	0.314833	0.282931	0.19253	0.0534867	0.418821	0.365437	0.326176	0.475045	0.440785	0.357435	0.287186	0.344417	0.369018	0.364984	0.178464	0.441072	0.357571	0.422996	0.385562	0.256481	0.287822	0.324948	0.144376	0.361866	0.215336	0.248007	0.273633	0.372725	0.228134	0.185829	0.233143	0.2561	0.303829	0.370209	0.114357	0.371575	0.192543	0.490788	0.162376	0.25971	0.218483	0.28079	0.365199	0.394459
WT10-D5	0.154088	0.121708	0.237442	0.304706	0.207081	0.245247	0.210538	0.126645	0.0660202	0.362896	0.309276	0.278981	0.410238	0.37578	0.295338	0.236052	0.275349	0.306471	0.299227	0.123629	0.37589	0.30698	0.37748	0.320911	0.194018	0.222345	0.246699	0.162831	0.301658	0.146194	0.198133	0.212792	0.302523	0.156852	0.114168	0.162213	0.203585	0.234812	0.307658	0.0484437	0.306027	0.124784	0.415507	0.222185	0.200268	0.165274	0.214907	0.31112	0.329875
TS7-D7	0.296892	0.264116	0.406398	0.441672	0.329166	0.424132	0.39122	0.263027	0.167279	0.495779	0.451325	0.408186	0.555435	0.538209	0.479913	0.375899	0.421249	0.449973	0.413667	0.248411	0.511253	0.477881	0.533462	0.50775	0.305111	0.384586	0.436067	0.147325	0.466757	0.337752	0.354373	0.395804	0.49201	0.347408	0.312046	0.31808	0.356188	0.418448	0.491977	0.217019	0.490063	0.31442	0.607664	0.117144	0.363946	0.294036	0.400195	0.462712	0.466599
WC10-D7	0.117904	0.168412	0.249087	0.17401	0.0908274	0.0914995	0.130918	0.129835	0.249803	0.194079	0.194443	0.189536	0.22535	0.19894	0.170054	0.183234	0.119336	0.154036	0.153351	0.189981	0.334233	0.168379	0.237604	0.233768	0.144871	0.0754723	0.113773	0.288243	0.140661	0.154506	0.258357	0.126429	0.219845	0.149303	0.118246	0.104095	0.111885	0.146525	0.211687	0.155379	0.197668	0.141407	0.266012	0.347294	0.172365	0.148035	0.0753074	0.181649	0.170263
WC3-H8	0.143607	0.113176	0.211348	0.293416	0.186518	0.240895	0.18754	0.145939	0.0945012	0.349629	0.293216	0.265639	0.384474	0.349112	0.273635	0.210387	0.272698	0.276346	0.300645	0.14315	0.351826	0.284137	0.365111	0.282739	0.199631	0.223005	0.246757	0.210183	0.288836	0.124456	0.185473	0.210889	0.276787	0.134394	0.103661	0.169757	0.204289	0.227617	0.280506	0.0860587	0.296277	0.112607	0.394148	0.262234	0.196939	0.155759	0.197242	0.315822	0.310702
TS7-D3	0.133376	0.106838	0.240883	0.269459	0.165614	0.21418	0.209039	0.0958703	0.149926	0.317031	0.275498	0.255097	0.350055	0.328955	0.287801	0.223348	0.233353	0.253403	0.264371	0.0993806	0.331149	0.28197	0.348883	0.322483	0.152071	0.165403	0.241482	0.182023	0.253923	0.173571	0.200974	0.211419	0.30494	0.173337	0.106468	0.141314	0.178209	0.242373	0.296777	0.054399	0.310301	0.132639	0.391926	0.250316	0.193184	0.146263	0.179868	0.293368	0.283088
TS10-D7	0.208259	0.170373	0.318115	0.347103	0.252008	0.316355	0.303147	0.161964	0.111528	0.395376	0.355248	0.335252	0.444756	0.427992	0.388243	0.302628	0.324776	0.341527	0.339262	0.151558	0.400872	0.374986	0.43244	0.40875	0.202812	0.274898	0.346485	0.0674683	0.360077	0.235357	0.268363	0.304225	0.394359	0.247229	0.215449	0.227768	0.266626	0.333519	0.382692	0.114884	0.396796	0.212306	0.496648	0.142971	0.267372	0.203528	0.287977	0.383569	0.363988
WT10-H0	0.191763	0.179165	0.298832	0.327691	0.213776	0.319559	0.281388	0.166142	0.154648	0.385082	0.343269	0.297368	0.442751	0.427053	0.36574	0.260775	0.317145	0.346765	0.308479	0.170123	0.401815	0.365677	0.428748	0.395698	0.215997	0.28532	0.329754	0.203731	0.361358	0.260763	0.258492	0.290606	0.379318	0.251836	0.212309	0.218763	0.249285	0.307181	0.382332	0.14382	0.379343	0.219615	0.493234	0.24667	0.272478	0.192739	0.283148	0.350594	0.35348
WC10-D3	0.135767	0.171315	0.219209	0.239769	0.151288	0.126508	0.137323	0.139208	0.201425	0.255943	0.24323	0.228874	0.28586	0.252342	0.191853	0.198103	0.191183	0.210356	0.212691	0.193516	0.335704	0.209427	0.272235	0.217573	0.180026	0.12308	0.137331	0.284626	0.182022	0.123031	0.239064	0.131326	0.202103	0.121276	0.0622581	0.127229	0.138422	0.13978	0.216177	0.14186	0.211283	0.0982943	0.285964	0.345389	0.151015	0.160093	0.124948	0.220983	0.250856
CS7-D7	0.212277	0.190585	0.233855	0.296571	0.212795	0.248611	0.161744	0.241565	0.20228	0.34308	0.282889	0.26382	0.353818	0.320106	0.268448	0.205776	0.283967	0.247559	0.311754	0.254234	0.369964	0.26739	0.367908	0.232285	0.279933	0.23647	0.248493	0.318043	0.290964	0.068727	0.23911	0.215816	0.196636	0.0877298	0.154746	0.222381	0.227319	0.230139	0.263664	0.20476	0.301138	0.167417	0.318291	0.357503	0.236005	0.220748	0.196051	0.323054	0.308833
WT8-D5	0.269269	0.237909	0.333171	0.422104	0.307835	0.369285	0.321886	0.253607	0.0829577	0.479891	0.417181	0.37018	0.525967	0.492504	0.408671	0.32406	0.398617	0.422302	0.414069	0.23834	0.490602	0.415419	0.481004	0.417396	0.316844	0.348754	0.353835	0.189061	0.425716	0.253118	0.301972	0.323808	0.400932	0.265662	0.219587	0.290832	0.322274	0.329537	0.425007	0.176646	0.414415	0.243331	0.519704	0.136435	0.312271	0.280731	0.337545	0.413053	0.445827
WT2-D7	0.131709	0.126002	0.193648	0.249049	0.159974	0.173764	0.137197	0.151979	0.193131	0.292928	0.23222	0.214809	0.324775	0.300057	0.221004	0.160767	0.215304	0.217217	0.248329	0.167344	0.350992	0.222925	0.296537	0.20915	0.189353	0.161309	0.203251	0.250096	0.228495	0.0479642	0.194688	0.148256	0.168199	0.0430389	0.117339	0.140409	0.157458	0.166297	0.220309	0.152465	0.235345	0.0826539	0.311171	0.326719	0.14633	0.169943	0.180127	0.257067	0.282429
WT3-H0	0.165908	0.188111	0.21541	0.253016	0.169662	0.158732	0.135088	0.191667	0.222182	0.278571	0.250276	0.243385	0.291194	0.257057	0.202985	0.189689	0.217872	0.209215	0.246521	0.215309	0.335538	0.204942	0.294834	0.194739	0.234284	0.155215	0.168745	0.318123	0.2022	0.0853042	0.228739	0.16705	0.171427	0.0762997	0.0899198	0.17986	0.18659	0.16371	0.211046	0.170569	0.234626	0.125809	0.25823	0.376454	0.196323	0.197741	0.138254	0.256243	0.255295
WC3-D3	0.121883	0.0931262	0.18933	0.273688	0.168087	0.217162	0.172735	0.121322	0.11157	0.324073	0.278226	0.244873	0.371348	0.337826	0.254688	0.190387	0.246304	0.264349	0.271176	0.137192	0.340468	0.260328	0.335853	0.277122	0.176628	0.194178	0.22146	0.209755	0.266946	0.10767	0.172425	0.182502	0.264522	0.122635	0.0735044	0.14272	0.174443	0.202565	0.267505	0.0769312	0.26647	0.0907484	0.383217	0.254596	0.173126	0.132318	0.193007	0.282566	0.294202
WC5-D5	0.287457	0.341724	0.379517	0.33196	0.258183	0.160248	0.247181	0.303936	0.383408	0.20123	0.35319	0.350175	0.227085	0.134854	0.169479	0.327831	0.219067	0.27311	0.266938	0.368896	0.477323	0.273904	0.231569	0.221076	0.31563	0.217562	0.103825	0.45564	0.182166	0.222911	0.403225	0.244282	0.164567	0.225274	0.249182	0.274351	0.281153	0.21346	0.319554	0.326977	0.190793	0.276619	0.0883176	0.512632	0.310548	0.319717	0.209983	0.225975	0.317848
WT8-D3	0.151303	0.13352	0.184357	0.246554	0.197997	0.238446	0.161623	0.140735	0.122069	0.365699	0.256739	0.225563	0.352377	0.329301	0.280998	0.223279	0.273011	0.259466	0.311543	0.153704	0.318752	0.253102	0.386168	0.273534	0.210485	0.230956	0.244456	0.231723	0.281819	0.153288	0.146135	0.220732	0.279809	0.141589	0.116646	0.173582	0.216867	0.240721	0.257942	0.0871505	0.313773	0.125692	0.349603	0.289941	0.206509	0.174078	0.160637	0.32016	0.271589
WC12-D7	0.31293	0.285602	0.255684	0.273308	0.355167	0.420852	0.347886	0.306881	0.207556	0.506319	0.317056	0.350232	0.417651	0.487484	0.463473	0.386886	0.430726	0.39992	0.451391	0.289905	0.259975	0.368761	0.540389	0.450072	0.370117	0.391828	0.446945	0.26682	0.448166	0.342207	0.206628	0.407374	0.467819	0.33777	0.311418	0.345244	0.364875	0.423602	0.302133	0.241066	0.489616	0.31993	0.508504	0.292891	0.395475	0.331694	0.332484	0.483138	0.241227
WC8-D7	0.171112	0.131673	0.263802	0.321772	0.220865	0.274929	0.247205	0.143166	0.0560903	0.379365	0.320347	0.289769	0.427185	0.392937	0.33096	0.247338	0.29423	0.317888	0.306367	0.135633	0.392973	0.326367	0.393768	0.356077	0.207696	0.237485	0.290063	0.137075	0.317503	0.183252	0.213645	0.246012	0.340195	0.19543	0.149574	0.181988	0.212103	0.268191	0.338475	0.0639848	0.340774	0.158436	0.458049	0.182358	0.231053	0.179246	0.244943	0.325123	0.347261
WC7-D5	0.111143	0.127866	0.161743	0.21163	0.126673	0.168168	0.127204	0.126987	0.184563	0.259477	0.231109	0.180233	0.326425	0.292291	0.197261	0.131532	0.199273	0.222712	0.221812	0.165006	0.334986	0.202844	0.275887	0.214294	0.168635	0.146354	0.161341	0.258101	0.216507	0.0879316	0.180718	0.124597	0.193798	0.0809638	0.0825349	0.108113	0.11544	0.140301	0.22996	0.144272	0.21724	0.0720221	0.328177	0.319917	0.138237	0.112835	0.167158	0.20925	0.259556
WT7-D7	0.156988	0.141847	0.250714	0.30935	0.201647	0.263342	0.226788	0.152671	0.0543267	0.378702	0.316338	0.270016	0.415732	0.382866	0.314667	0.225859	0.289723	0.313221	0.31972	0.142645	0.381616	0.316055	0.397335	0.347619	0.219368	0.249346	0.288961	0.151868	0.313384	0.188311	0.201812	0.255238	0.327238	0.188169	0.158474	0.188152	0.226523	0.268633	0.330996	0.0736828	0.343328	0.160061	0.443175	0.204492	0.233996	0.182002	0.227555	0.322313	0.336312
TS1-D3	0.161475	0.134439	0.27829	0.294724	0.198487	0.260149	0.249705	0.123928	0.152538	0.345959	0.314188	0.294084	0.389986	0.375075	0.332858	0.260861	0.27076	0.298181	0.276994	0.133568	0.353828	0.325389	0.39135	0.36585	0.15847	0.214247	0.289411	0.154127	0.299541	0.19874	0.243766	0.258415	0.349026	0.204762	0.138961	0.173391	0.214944	0.285353	0.335557	0.0833632	0.354844	0.162972	0.43843	0.25188	0.226914	0.161144	0.220672	0.339036	0.311225
WT10-D7	0.287934	0.24925	0.344764	0.436257	0.336034	0.370659	0.340877	0.259571	0.109649	0.486742	0.425909	0.400507	0.52019	0.489034	0.424462	0.350877	0.412389	0.420151	0.434939	0.242496	0.481721	0.417976	0.47804	0.416606	0.315533	0.347655	0.365649	0.192934	0.429056	0.25337	0.317307	0.335832	0.41038	0.270445	0.229411	0.305661	0.337945	0.350065	0.422328	0.182902	0.426372	0.251804	0.508694	0.107184	0.312765	0.29497	0.333478	0.438223	0.449179
TS6-D5	0.225522	0.27911	0.354721	0.262502	0.189613	0.121604	0.227465	0.226701	0.354802	0.160822	0.296219	0.297752	0.194892	0.142373	0.178516	0.288069	0.152016	0.210726	0.182356	0.295517	0.416745	0.242106	0.215618	0.263748	0.222528	0.159791	0.119654	0.36586	0.139873	0.267597	0.367269	0.224166	0.250979	0.262144	0.227571	0.214642	0.224209	0.214919	0.305254	0.261491	0.201936	0.256135	0.233075	0.451413	0.276794	0.245192	0.151325	0.184656	0.256355
WC6-D5	0.181815	0.153312	0.268891	0.336467	0.224757	0.281074	0.247296	0.166319	0.0372361	0.397491	0.3377	0.293176	0.443267	0.409815	0.334816	0.249171	0.311487	0.338685	0.321978	0.157442	0.408806	0.338075	0.408061	0.359764	0.231577	0.260403	0.294101	0.152427	0.337326	0.190721	0.222941	0.253811	0.346485	0.20132	0.158684	0.199718	0.230469	0.266688	0.344666	0.0860202	0.346553	0.165349	0.460864	0.188538	0.241324	0.198949	0.255219	0.33348	0.363856
TS2-D3	0.0847865	0.126176	0.228986	0.219124	0.118855	0.169841	0.172154	0.0713368	0.192326	0.271582	0.23727	0.216385	0.299859	0.279365	0.253693	0.214865	0.192037	0.221711	0.231584	0.132477	0.306664	0.249593	0.313505	0.291358	0.0996876	0.138213	0.192624	0.214373	0.223217	0.184246	0.220571	0.18326	0.273143	0.181351	0.117825	0.0993116	0.143539	0.210989	0.26232	0.0986897	0.27757	0.127048	0.34441	0.28838	0.157034	0.105741	0.124908	0.25959	0.224924
WC6-D7	0.0686425	0.11244	0.194183	0.172148	0.0860005	0.108298	0.104281	0.0755798	0.228051	0.212246	0.171695	0.152045	0.250405	0.23392	0.176749	0.150368	0.12564	0.153605	0.157205	0.137177	0.310738	0.170107	0.239437	0.211525	0.0977913	0.0651429	0.155461	0.236123	0.146748	0.137642	0.204453	0.102567	0.194866	0.12947	0.0933796	0.0455586	0.0641965	0.129091	0.185821	0.131663	0.19861	0.0817247	0.32311	0.313155	0.116819	0.114058	0.121174	0.181941	0.21123
WT6-D3	0.226499	0.199112	0.306358	0.381563	0.265614	0.324503	0.283627	0.21144	0.113435	0.442061	0.377989	0.33472	0.488932	0.454136	0.37331	0.286671	0.355378	0.382693	0.372975	0.219434	0.454014	0.384587	0.4482	0.368992	0.274801	0.310153	0.307531	0.261381	0.385098	0.150971	0.264566	0.281746	0.289495	0.175745	0.194073	0.246568	0.280165	0.290454	0.387712	0.162595	0.377208	0.200093	0.423183	0.265031	0.272353	0.241079	0.294732	0.375438	0.408461
TS8-D7	0.186384	0.185761	0.177271	0.248407	0.224136	0.248524	0.18138	0.203288	0.189873	0.362767	0.252648	0.220141	0.345361	0.331421	0.286631	0.225815	0.29789	0.254619	0.331944	0.218328	0.320404	0.232455	0.365968	0.257485	0.237226	0.234777	0.260871	0.278354	0.283858	0.0952062	0.177287	0.226944	0.232704	0.0997861	0.144924	0.205208	0.221461	0.246554	0.24497	0.165247	0.31748	0.142373	0.289349	0.340618	0.210311	0.196821	0.170647	0.323248	0.272602
TS10-D3	0.243576	0.301721	0.370237	0.281899	0.2109	0.139555	0.242012	0.25439	0.37343	0.145253	0.309553	0.312583	0.178875	0.113692	0.164531	0.304839	0.167866	0.231454	0.217433	0.314914	0.440686	0.254195	0.199544	0.252099	0.268096	0.190518	0.120209	0.41143	0.147672	0.289437	0.38268	0.247785	0.229232	0.276587	0.249824	0.235112	0.246569	0.235176	0.319088	0.285098	0.196902	0.272342	0.210857	0.475092	0.299033	0.268942	0.171016	0.206015	0.276668
WT1-D7	0.321687	0.278905	0.42516	0.458679	0.359927	0.427605	0.415842	0.271456	0.199917	0.507568	0.460649	0.439502	0.556684	0.540406	0.499981	0.408385	0.438232	0.450928	0.435894	0.25991	0.513203	0.485931	0.538021	0.519993	0.306693	0.376991	0.45455	0.168488	0.469699	0.347799	0.378045	0.407843	0.506623	0.36022	0.317688	0.337899	0.373582	0.442623	0.49582	0.218687	0.506938	0.32408	0.604983	0.165751	0.367924	0.315498	0.388099	0.488851	0.475643
WT7-D3	0.411859	0.475797	0.486984	0.436555	0.379888	0.278587	0.358635	0.43699	0.498217	0.317651	0.459926	0.457213	0.315903	0.200031	0.285286	0.439001	0.340837	0.382953	0.399892	0.492209	0.570515	0.382981	0.352095	0.33255	0.445393	0.35225	0.236318	0.585026	0.289324	0.398025	0.514555	0.378067	0.313648	0.373016	0.378064	0.407327	0.415117	0.349498	0.428558	0.447332	0.327083	0.401132	0.187059	0.638843	0.434263	0.450716	0.299998	0.357421	0.421314
WT9-D3	0.245908	0.280999	0.325239	0.313041	0.237251	0.169583	0.207564	0.259669	0.303328	0.230679	0.320239	0.31654	0.270693	0.213606	0.177378	0.274003	0.230797	0.255317	0.274819	0.306547	0.433476	0.252597	0.255721	0.187458	0.288493	0.194458	0.131311	0.401223	0.196579	0.14989	0.343651	0.208698	0.114335	0.151458	0.182569	0.236066	0.244918	0.183035	0.285523	0.251528	0.201673	0.209998	0.179467	0.455623	0.265868	0.274032	0.193509	0.244316	0.319397
TS10-H0	0.127895	0.125074	0.233533	0.264912	0.143135	0.2604	0.206148	0.121122	0.135936	0.330641	0.292594	0.251103	0.364843	0.348864	0.300176	0.205887	0.265913	0.278491	0.286652	0.117828	0.325004	0.298469	0.390323	0.337214	0.188153	0.231774	0.282888	0.196388	0.295065	0.206404	0.187303	0.259572	0.32671	0.203319	0.151052	0.174856	0.214829	0.274142	0.31614	0.0833946	0.339402	0.170487	0.425903	0.263833	0.241648	0.141651	0.205442	0.322661	0.28143
TS5-H0	0.218133	0.182692	0.315152	0.373513	0.258407	0.328493	0.295102	0.196166	0.0601414	0.432016	0.370528	0.327114	0.480746	0.446294	0.38227	0.28278	0.345053	0.372924	0.354603	0.184108	0.446433	0.37946	0.443997	0.408268	0.259925	0.29023	0.340866	0.151994	0.369226	0.236867	0.262169	0.297653	0.394719	0.246504	0.203027	0.230125	0.261952	0.315765	0.391727	0.117459	0.393751	0.211028	0.511175	0.160297	0.281412	0.228099	0.291702	0.368849	0.400158
WC1-D5	0.262723	0.24548	0.195219	0.248974	0.292197	0.36493	0.270443	0.268938	0.13083	0.478092	0.288953	0.296847	0.388585	0.442394	0.394702	0.305437	0.397843	0.369528	0.424277	0.254449	0.312149	0.320719	0.493229	0.375688	0.33074	0.358996	0.366412	0.270612	0.410854	0.264623	0.150525	0.338166	0.391387	0.261093	0.241456	0.301815	0.333721	0.342775	0.251255	0.190709	0.419128	0.245888	0.430455	0.300891	0.325022	0.288499	0.281899	0.423852	0.267486
WT9-D5	0.108696	0.160668	0.197328	0.226016	0.100739	0.173073	0.12674	0.147649	0.171101	0.29106	0.248016	0.200243	0.322067	0.287287	0.213212	0.149081	0.211774	0.240197	0.2506	0.191735	0.334635	0.234432	0.319386	0.236955	0.192012	0.171358	0.164604	0.291105	0.235065	0.129041	0.218662	0.164702	0.221309	0.122814	0.0948023	0.131074	0.164701	0.161372	0.242064	0.147897	0.244992	0.106993	0.318729	0.342743	0.163475	0.143024	0.137038	0.247233	0.242229
WT1-D5	0.133742	0.150924	0.208901	0.244918	0.137049	0.165461	0.133596	0.148784	0.183573	0.280923	0.249587	0.2288	0.321848	0.287104	0.21479	0.170498	0.204777	0.229834	0.237127	0.18912	0.342937	0.228586	0.303983	0.220527	0.194076	0.1461	0.155163	0.284491	0.223391	0.0717153	0.224067	0.14042	0.198189	0.0766193	0.0648284	0.132479	0.148885	0.155449	0.234863	0.134269	0.231997	0.0952931	0.299324	0.342672	0.163773	0.156627	0.128933	0.247357	0.252497
WT4-D5	0.306675	0.276845	0.375368	0.462173	0.344919	0.404759	0.363087	0.288271	0.11839	0.520348	0.455863	0.409251	0.56882	0.534189	0.452612	0.359207	0.432771	0.460712	0.451281	0.272433	0.53277	0.45875	0.516878	0.454316	0.349445	0.387474	0.38688	0.195863	0.46336	0.285469	0.342161	0.360333	0.438188	0.294107	0.260978	0.323416	0.35911	0.371045	0.466685	0.212119	0.455787	0.279187	0.552831	0.134331	0.339426	0.317248	0.373402	0.452585	0.488127
WT6-D5	0.207518	0.164347	0.284732	0.356937	0.259142	0.291159	0.264026	0.171744	0.0447823	0.409968	0.348152	0.325343	0.456702	0.422113	0.348194	0.283071	0.326857	0.349205	0.346441	0.164604	0.422229	0.349821	0.41857	0.335847	0.237003	0.270207	0.28208	0.173657	0.348069	0.163258	0.244136	0.247567	0.321922	0.173312	0.15678	0.214025	0.250283	0.268085	0.351548	0.0921877	0.348742	0.161536	0.433864	0.202587	0.239468	0.215754	0.261676	0.359764	0.376461
TS2-H8	0.285546	0.247259	0.372285	0.442068	0.327222	0.388457	0.355444	0.261321	0.118538	0.500259	0.43443	0.389003	0.548742	0.514215	0.442913	0.346943	0.413168	0.437346	0.426202	0.242345	0.51411	0.440904	0.501091	0.469556	0.322131	0.357602	0.400955	0.174232	0.438207	0.299437	0.321554	0.357193	0.454989	0.30935	0.268693	0.29881	0.335308	0.380201	0.454504	0.180655	0.453443	0.275926	0.571342	0.130583	0.328317	0.294002	0.352579	0.432212	0.468139
TS8-D3	0.305486	0.258877	0.409608	0.44377	0.34782	0.416117	0.399	0.254016	0.166022	0.493115	0.443552	0.42247	0.547553	0.53225	0.482293	0.393306	0.421297	0.443296	0.415884	0.237808	0.504792	0.467154	0.525582	0.49949	0.299119	0.371237	0.43766	0.147644	0.455536	0.324901	0.359241	0.388015	0.488422	0.336841	0.296546	0.315103	0.351407	0.420925	0.479402	0.198412	0.48895	0.3005	0.598932	0.125277	0.357956	0.296227	0.379512	0.472201	0.461903
WT6-D7	0.312964	0.291488	0.248391	0.264745	0.352642	0.399043	0.338314	0.297833	0.232938	0.49866	0.302448	0.347768	0.409974	0.468315	0.450379	0.384161	0.423165	0.392966	0.457718	0.290142	0.219385	0.356684	0.532319	0.446847	0.364925	0.377825	0.430249	0.291435	0.42731	0.33805	0.206443	0.401537	0.454139	0.328839	0.307309	0.335039	0.369653	0.425639	0.294292	0.224925	0.485329	0.314072	0.483147	0.344711	0.384816	0.335647	0.318618	0.473204	0.231991
TS9-H8	0.254781	0.208577	0.333102	0.404285	0.304629	0.336351	0.321293	0.215735	0.0925876	0.45663	0.388788	0.366305	0.499665	0.465098	0.40458	0.325598	0.374791	0.39016	0.389186	0.197827	0.464878	0.393138	0.454917	0.421042	0.277	0.309206	0.362381	0.152443	0.388325	0.247506	0.287164	0.311254	0.410947	0.260745	0.212488	0.263547	0.292512	0.342751	0.400454	0.132815	0.411637	0.221475	0.518782	0.14112	0.2816	0.259749	0.305252	0.402838	0.422828
WT1-D3	0.234465	0.227211	0.257841	0.298843	0.228054	0.202998	0.164599	0.262974	0.305584	0.258484	0.301619	0.287496	0.270403	0.245543	0.223076	0.176628	0.253155	0.188481	0.291326	0.291755	0.337958	0.222365	0.311912	0.199254	0.297013	0.211452	0.228495	0.372468	0.225493	0.209711	0.275746	0.2439	0.25935	0.195996	0.18285	0.247793	0.253992	0.2285	0.25976	0.234491	0.277098	0.222543	0.326106	0.404309	0.277154	0.251252	0.1609	0.282157	0.3014
WT7-H8	0.238477	0.204546	0.309909	0.389958	0.286058	0.331045	0.305714	0.214377	0.106618	0.436705	0.388586	0.363014	0.47239	0.439826	0.38893	0.307868	0.365698	0.37185	0.390466	0.207236	0.432584	0.372868	0.43903	0.408641	0.270322	0.30193	0.354073	0.173157	0.382499	0.243017	0.276066	0.316367	0.402956	0.262298	0.206146	0.26047	0.295733	0.337851	0.385499	0.138046	0.399606	0.228508	0.502428	0.120843	0.290967	0.250935	0.286184	0.397077	0.401847
[truncated: 128 more columns]

## Sheet: Exposed weighted unifrac PC
Eigvals	177
3.49669	0.822281	0.66976	0.49076	0.254809	0.192801	0.162687	0.120315	0.109407	0.102599	0.0885553	0.0787307	0.0661597	0.0555788	0.0497633	0.0422605	0.0392068	0.0367021	0.0354866	0.0316052	0.0291411	0.0270092	0.0262061	0.0245257	0.0214391	0.0194131	0.0186988	0.0177811	0.0153858	0.013202	0.012158	0.0117791	0.0108701	0.00980195	0.00905926	0.00855425	0.00824484	0.00754954	0.00682044	0.00619365	0.00588404	0.00522818	0.00513654	0.00449211	0.00427855	0.00397286	0.00371966	0.00309296	0.00289412	0.00253281
Proportion explained	177
0.478478	0.112519	0.0916481	0.0671543	0.0348674	0.0263824	0.0222617	0.0164635	0.014971	0.0140394	0.0121177	0.0107733	0.00905312	0.00760526	0.00680948	0.00578281	0.00536495	0.00502222	0.00485589	0.00432477	0.00398759	0.00369586	0.00358597	0.00335603	0.00293367	0.00265644	0.00255869	0.00243312	0.00210535	0.00180653	0.00166367	0.00161182	0.00148743	0.00134127	0.00123965	0.00117054	0.0011282	0.00103306	0.000933291	0.000847523	0.000805156	0.00071541	0.00070287	0.000614688	0.000585465	0.000543636	0.000508988	0.000423232	0.000396024	0.000346584
Species	0	0
Site	177	177
CS1-D7	-0.00602228	-0.0287163	-0.04417	-0.0174461	0.033594	-0.00802086	0.0170727	-0.00671665	0.0316719	0.0189483	-0.00264379	0.00272478	-0.0116321	0.00102045	-0.00123105	0.00104735	-0.0125986	0.00224469	-0.0195974	0.0137099	0.00260161	0.00755367	-0.0199584	0.0052725	0.00327547	-0.0032109	0.0191926	-0.000600943	0.00355428	-0.00155121	0.0044231	-0.000569226	0.00562149	-0.00952317	0.00498115	-0.0059741	0.000249191	0.00337453	-0.00494192	0.00843701	-0.00106381	-0.00111396	-0.00425069	0.000194148	0.00245123	-0.00197874	-0.00336669	-7.07544e-05	0.0057401
CS1-H0	-0.0604866	-0.0267657	-0.0313914	-0.0502817	0.0478895	0.0303848	-0.0356989	0.00170597	0.0155554	0.0249714	-0.0188702	0.0101457	-0.0138003	-0.0133222	0.00745369	-0.0130021	-0.00774782	0.0197007	-0.00553469	0.000845878	-0.0107175	-0.00108856	0.0237885	-0.0211383	0.0100116	0.00291798	0.0167889	-0.00508505	0.000835992	0.00733314	-0.00418122	0.00494443	0.00572553	-0.00921927	0.00234549	0.00418424	0.00397532	0.00395823	0.00466655	-0.0081367	-0.0116392	-0.00221192	-0.00155475	0.00107576	-0.00356192	-0.00023345	0.00582247	0.00501146	-0.00778241
CS10-D3	0.00556401	-0.151303	0.0708946	-0.0587201	0.023405	-0.0355771	0.0137609	0.0209014	-0.0177693	0.0623732	0.00807034	0.00148833	0.0269523	0.00392629	-0.00370258	-0.012189	-0.021837	0.00459953	-0.00148464	-0.00645295	-0.0105873	0.0277976	-0.00929177	-0.00136425	-0.000576821	0.00188143	0.0116866	0.00568118	-0.00877396	0.00486328	-0.00403971	-0.0153925	-0.010313	0.00792029	0.000478674	0.00171583	-0.00851982	-0.00177592	0.0167835	0.0034267	-0.00197766	0.00595042	0.00165425	-0.00206858	0.00165831	-0.00287923	-0.00210308	-0.00533895	0.00416302
CS10-H0	0.0879731	-0.180981	-0.00909733	0.0161397	0.00606118	-0.0279393	0.0415856	-0.0437419	-0.022155	0.0278402	0.0400953	-0.00447514	-0.000656744	-0.000591719	-0.0294222	0.00341509	0.0236127	0.00809041	0.0100009	-0.0171269	-0.0212142	-0.00613902	0.00719236	0.0207363	0.0176904	0.00980816	0.00206603	0.00177046	0.00399373	-0.00345613	0.0131097	-0.000397072	0.0131084	0.000937429	-0.00416857	-0.00587096	0.00778461	0.00891557	-0.00777086	-0.00213031	-0.00051956	0.0116809	-0.000277665	-0.00152635	-0.00432808	-0.00103318	-0.00449185	-0.000125108	-0.00199235
CS10-H8	0.0318887	-0.0243274	-0.049751	0.0137432	0.0699465	-0.0242241	0.0319475	-0.0205858	0.0235491	-0.0220898	0.0207131	0.000769158	-0.0206597	0.00883028	-0.00186742	-0.01353	-0.00470436	-0.0140679	-0.0129962	-0.00654262	0.0138171	-0.0109202	-0.0107764	-0.00300566	0.0103832	0.0184706	-0.0133051	-0.0106328	0.00953936	0.0108154	-0.0086934	0.00268655	-0.00549968	0.00382256	0.0018184	-0.00782056	0.00546858	0.00845758	0.0119569	0.00381271	0.00193138	0.00442889	-0.00505316	0.00370677	-0.00633527	0.00822607	0.000297318	0.00305544	0.000438555
CS2-D5	0.116282	0.0234259	-0.0252573	0.0181978	-0.0145907	0.00398038	-0.0126043	0.0180088	-0.000912384	0.0153187	0.0181142	-0.00606617	-0.0108962	0.00630666	-0.0258474	-0.0156793	-0.0127914	0.00562383	0.0208275	0.013253	-0.0057087	-0.00344552	0.00234044	0.0261593	0.00663788	-0.0104569	-7.28269e-05	0.000962406	-0.0072452	0.000358627	-0.000136476	-0.000657152	0.0132107	-0.00358868	-0.00528304	-0.00622778	-0.00866046	0.00845562	0.00740393	0.00645172	0.00547009	0.00531271	-0.00397459	0.00210366	0.0102094	0.00359285	0.00628552	0.00294957	-0.000989638
CS2-D7	0.0645259	-0.0375094	0.0312009	-0.0128771	0.0394889	-0.0336418	-0.00577422	0.0226207	0.013969	-0.0209629	0.0061062	-0.0134656	-0.000983952	-0.00980022	-0.0136105	0.00203447	-0.0166485	0.0144025	0.00117505	-0.00318899	0.0214537	0.00389413	0.00726071	0.00146447	0.00883836	-0.0165463	0.00140777	0.025745	0.0180364	-0.000207824	0.00155217	0.00708275	0.00369776	-0.0101949	0.00135763	0.00191055	0.0104208	0.00268478	0.00138246	0.0060207	-0.00150635	-0.00292036	-0.00208821	-0.00667639	0.00469319	-0.00257355	-0.00381821	0.00143873	0.00541039
CS3-D5	-0.0384913	-0.0211685	-0.0653186	-0.0144735	0.00628503	0.0292843	0.01471	-0.0137073	0.0259072	0.0332952	-0.0010795	0.0121792	0.00711149	-0.00551637	-0.00914695	0.00762991	-0.00857252	0.0146401	0.00319708	0.0103131	-0.00302897	-0.0136959	0.00736615	0.00159603	0.0110907	-0.0132959	-0.00115969	0.00885095	-0.00282845	0.00334927	0.00326465	0.00409228	0.00362431	0.00232937	-0.00620072	0.001197	0.00515144	0.00899883	-0.0184086	0.0133445	0.0188325	-0.00268573	-0.0079656	-0.00773719	-0.00163292	0.0045962	0.000968758	0.00327879	-0.00249096
CS3-D7	-0.177592	0.0421255	0.0317417	0.00506171	-0.0227567	-0.0403235	0.00460436	0.00392212	0.00291037	0.000434542	-0.0102587	0.00500765	-0.0204297	-0.0189302	0.00357208	0.00812197	0.00695645	-0.00015419	0.0022535	0.00966063	-0.00439401	-0.00377338	-0.00028259	0.0131238	0.00195665	-0.00453284	0.00295869	0.00699555	0.0220498	0.00239483	-0.0151226	-0.0163377	0.00556323	-0.00460209	0.00809756	-0.00293973	0.000855003	-0.00420627	0.00409193	0.000580013	-0.00654788	-0.00597748	-0.000108313	0.0106297	-0.00510711	-0.00198934	0.00181099	0.00195866	0.003017
CS3-H0	0.197375	0.0247721	-0.0871209	0.00700504	0.0967505	0.00516852	-0.0646894	-0.0255577	-0.0241345	0.0533217	0.0256281	0.0189656	0.0208853	-0.0288938	0.0133971	0.0167631	0.03409	0.0237636	-0.00962412	-0.0092818	-0.0183831	-0.000243538	0.00699933	0.0074893	-0.00580885	-0.0134124	-0.00675861	-0.00887918	-0.00140827	-0.00541222	-0.00734191	-0.00655184	0.00317945	-0.00908472	0.00291681	-0.00278891	-0.00354739	-0.00135096	0.000755243	0.00388412	0.00710821	0.00304165	-0.00104969	-0.0030304	-0.0029391	0.00794497	0.00175134	-0.00357281	0.00400944
CS4-D5	0.0965669	-0.154542	-0.0246236	-0.0691403	-0.0697566	-0.00558965	0.0318297	-0.00580411	-0.00301895	-0.0389693	0.000698487	-0.0198732	-0.0125146	0.0176215	0.018986	-0.015509	-0.00596816	0.00431945	0.00408178	0.00162597	-0.0233898	0.00787558	0.0145918	-0.0193618	0.0187019	-0.00681991	-0.0124372	-0.00778838	-0.00600883	0.00305549	-0.0109209	-0.0113643	-0.0141223	0.0174081	0.00440858	-0.00225589	0.000866382	0.00328306	0.00468275	-0.00638327	0.0043861	0.0047093	0.00295021	-0.00798348	1.52402e-05	0.00882752	0.00028784	-0.00628411	0.00276902
CS4-H8	0.0701804	-0.100552	-0.0356586	-0.0901258	-0.0154275	-0.063211	0.0444676	-0.009703	0.00193514	-0.0224936	-0.00732626	-0.0540888	0.0293485	0.0285088	0.0203551	-0.00539077	0.0177952	-0.00326259	0.00692138	-0.0182998	-0.000360852	0.00203734	-0.0136777	-0.0136841	-0.00107867	-0.00615413	-0.00047859	-0.00209137	0.00539386	0.0107987	-0.0111519	-0.0030465	0.000509138	-0.00264739	0.0114747	0.00267629	0.0105436	-7.89207e-05	-0.00325623	0.00115468	-0.00721886	-0.00918942	-0.000732127	-0.000523486	-0.00353816	-0.00351423	0.00257798	-0.000426814	-0.00242571
CS5-D5	0.239604	-0.127857	-0.0200547	0.050997	-0.0126536	-0.0115205	-0.0864729	-0.0258622	0.0185601	0.0245929	0.0135958	0.0476578	0.000574565	0.00226001	0.00082345	-0.0287334	0.00156525	0.0372507	-0.0128539	-0.0165099	-0.00807801	0.00576461	-0.000578712	-0.001182	-0.00567388	0.0168377	-0.0113771	-0.00302666	0.000985419	-0.0099263	-0.0090168	-0.00188116	-0.00221455	0.000680432	-0.00565381	-0.00464626	0.00435326	0.0057179	0.00306446	-0.000784421	-0.00624165	-0.00429928	0.00248525	-0.00176164	0.00650654	-0.00439639	-0.00223622	-0.00382543	-0.000980605
CS5-H0	0.219836	-0.0025937	-0.0153518	0.102113	0.031915	-0.00435449	-0.0715276	0.0277196	0.0423768	0.0295391	0.00389064	-0.0409125	-0.0192773	-0.000527751	0.0129345	-0.013253	-0.0127839	0.0105769	-0.00814192	-0.0308531	0.0349141	-0.0124412	-0.00114095	-0.0182014	0.0127462	-0.0030838	-0.0111902	0.0127862	0.00984233	0.0018312	0.00584721	0.00866482	-0.00641645	-0.000216344	0.000893032	-0.000268806	-0.005737	-0.00860233	0.00523882	-0.00253629	0.00471457	0.00440953	-0.000925595	-0.00248243	-0.00785729	-0.000986854	0.00831573	0.00676681	0.00241494
CS5-H8	0.16762	0.0285609	-0.00266946	-0.0193036	0.0214702	-0.0496028	-0.0285277	0.0121532	-0.0101947	0.0324835	-0.00499572	0.00434741	0.00292261	-0.0214604	-0.0123502	-0.00257719	-0.00475961	0.0103149	-0.0167454	0.00109533	0.00723375	0.0180939	0.00625732	0.0139437	-0.00346131	0.0100774	-0.00478366	-0.00618223	-0.000834957	0.00427425	0.00549749	-0.00385192	0.00582129	0.00109431	-0.0114603	-0.00131498	0.0242793	0.013827	0.0175697	-0.0101322	-0.00970668	-0.00570895	-0.000169626	-0.00266913	7.33409e-05	-0.00385862	-0.000275673	0.00508925	0.000633733
CS6-D3	0.0285503	-0.026801	0.00205512	-0.0726851	0.126167	-0.0331647	-0.0164441	0.0364466	-0.0155963	0.00290697	0.00246542	-0.0287533	-0.000310685	0.00527295	-0.0143415	-0.0232875	0.0244833	-0.00769938	0.00599661	-0.00247096	-0.023238	-0.00991263	-0.0151331	0.00914445	-0.0147004	-0.000251613	-0.0218912	0.00687236	0.00169385	-0.00294626	-0.00357468	0.00208146	-0.00295733	-0.00282079	-0.00336589	0.000837273	-0.00568328	0.00349654	-0.00857753	0.00239651	-0.0037634	0.00134694	0.00568216	-0.00421568	-0.00403221	0.00383563	-0.00590963	-0.00379216	0.00195145
CS7-D3	0.1273	0.00773094	-0.0896996	-0.0252401	-0.0160834	-0.00452426	0.00637316	-0.0123241	0.00487024	-0.0183936	-0.00474617	-0.00058347	-0.0077296	0.000571129	-0.00474029	-0.0021396	0.00392936	0.00104733	0.0112569	0.0156759	-0.00902238	0.0178323	0.0101916	-0.0139203	-0.0232544	-0.00307617	0.00491945	-0.0070689	0.0143836	-0.0045709	0.00493696	0.0154025	0.0182811	-0.00399819	-0.00106864	0.00492745	-0.00891174	-0.017642	0.00515967	0.00282902	-0.00833088	0.00861869	-0.0146771	0.00359406	-0.00122154	0.000906307	-0.00350941	-0.00339763	-0.00141481
CS7-H0	0.133106	-0.0650702	-0.0397116	-0.0453637	0.0120287	0.0253938	-0.0519303	0.0162499	0.0221057	-0.0590231	-0.000998359	-0.0145138	0.022904	-0.00529398	0.015167	0.00457429	0.00877636	0.00319942	0.00641796	0.0142763	0.0192285	-0.0109382	0.00637467	-0.0093365	-0.0126571	0.00478582	0.00674892	-0.00419207	0.0115341	0.0150838	-0.0014766	-0.00507455	0.00188462	-0.0190015	0.00260973	-0.00345106	-0.0010448	0.00641944	0.00588076	-0.00371498	0.000467452	0.0116988	-0.000607886	0.000428739	0.00563527	-2.32815e-05	-0.00364749	-0.000736509	-0.00162795
CS7-H8	0.124382	0.0133288	-0.124412	-0.0646447	-0.0130941	-0.00244507	0.0225631	-0.0395301	-0.0301908	-0.0521656	-0.0163455	0.0243869	-0.00882242	-0.00320787	0.00760147	0.000661447	-0.0168978	-0.029024	0.0171477	-0.028867	0.00367799	0.000645695	0.0263637	0.0106869	0.00779505	-0.0143069	0.00801346	0.0196958	-0.00296595	-0.0214965	-0.00566135	-0.00465517	-0.0132526	-0.00370738	-0.005073	0.00338293	-0.00261934	0.0097699	0.00518452	0.00160444	-0.00385181	-0.00586942	0.000388544	0.00395765	0.00691986	0.00446858	0.00039554	0.000619471	0.00449309
CS8-D3	-0.0712273	-0.0276954	-0.0698166	-0.0704027	-0.0376367	0.0265235	-0.00959554	-0.0080173	0.0370106	0.0232967	-0.0427944	0.00537005	0.01628	-0.00629241	-0.00801948	-0.00158099	0.00298316	-0.0135801	-0.0125723	0.0184549	-0.0143969	-0.0116034	0.0117215	-0.00882461	-0.0297131	0.00842179	-0.017502	-0.00182684	0.00574548	-0.000601946	-0.0137549	-0.000393172	0.00348575	0.0106698	-0.000337569	-0.0125355	-0.00297199	0.000870403	0.00503438	-0.00264388	0.00313316	0.00609964	0.000407956	-0.00126471	0.00635966	-0.00562005	-0.00438177	0.00221439	0.00032306
CS8-D5	0.0122361	-0.309975	0.0586791	0.0490514	0.106923	0.10759	0.0465966	0.024752	0.0150282	0.0369066	-0.0232215	0.0339729	-0.0203271	-0.0326736	0.0202049	0.0223857	-0.0150252	0.00503943	0.00529707	0.0154073	0.0142077	-0.00254415	-0.0254833	-0.00472575	-0.0211295	-0.0144208	-0.00311823	0.00345839	-0.00521728	0.00276438	-0.00389278	-0.00464307	-0.00239336	-0.00207416	0.00258917	0.00130886	-0.00455346	0.00253123	0.00143215	-0.000297926	-0.00081903	-0.00108231	0.00235978	0.000736024	0.000352953	0.00143974	-0.00332276	0.000696628	5.83213e-05
CS8-H8	0.136465	-0.0909624	0.0175766	-0.0328628	-0.0224186	-0.0326678	-0.0209152	0.0179856	-0.0441723	0.00827003	0.0273146	-0.0254416	0.0432324	0.020622	-0.0265826	0.0138076	0.0141996	-0.0107381	-0.00286961	0.00386777	0.000336528	0.00461544	0.0117553	0.00769216	-0.015158	-0.0136547	-0.00762573	-0.0161822	-0.00926699	0.00961781	-0.0100893	-0.00757349	-0.00593866	-0.00418147	-0.00682802	-0.0076538	-0.0168189	0.00519126	0.00208448	0.00366407	0.00042079	-0.00896919	-0.00536673	-0.00132361	-0.00746024	0.010727	-0.000863259	0.00385689	-0.00637566
CS9-H8	0.213762	0.0579363	-0.0798591	-0.0773325	-0.042596	-0.0174498	-0.0405821	0.0299092	-0.0448737	0.0349875	0.010662	-0.010408	0.0251206	0.0193854	0.0588488	-0.0252779	-0.00969186	-0.00817063	-0.0223941	-0.00192899	-0.00596285	0.00628845	-0.0109076	-0.0159377	0.0186768	0.0045549	-0.0156074	-0.00175899	-0.00402038	-0.0234396	-0.002468	0.00623047	-0.00470607	0.000378567	0.00169096	0.00605664	-0.00531781	0.00228629	-0.000128139	0.00376961	-0.00335186	-0.00633432	0.0083398	-0.000979149	0.00384257	-0.00972438	-0.00329511	0.000595922	-0.0045124
TS1-H8	0.167222	0.000475827	0.0662884	-0.0706856	-0.00196472	-0.0171624	-0.0476148	0.0270121	0.043351	-0.037095	-0.0158706	0.0177279	0.0151323	-0.0406536	0.038214	0.0236812	0.0116033	0.0276079	-0.00615571	-0.00955625	-0.008969	-0.0214525	-0.00955628	-0.0151395	-0.00740044	-0.0110212	-0.00272542	0.00464283	-0.00586454	0.00137947	-0.00659578	0.00969967	0.00578405	-0.00135736	0.00768924	0.00064697	0.000239306	-0.000497731	-0.00630516	-0.00778065	-0.00740174	-0.00167691	-0.0012295	0.00300048	0.00199851	0.00739749	0.0020884	-0.000818504	0.00185109
TS2-D5	0.00408589	-0.0238555	-0.107654	-0.0583025	-0.0218269	0.0444485	0.0402352	-0.0119329	0.0312173	-0.000128416	-0.00012079	0.0166077	0.0420953	-0.014058	0.0178596	0.00759035	0.00920134	0.00737831	0.0053171	0.00529815	0.0304376	-0.0138208	0.0115909	0.0218072	-0.00419927	0.0173912	0.00501274	-0.0150346	-0.00114316	-0.000511463	0.0107168	0.00869206	-0.00407599	0.00143739	0.00968149	0.00018783	-0.00913795	-0.0010953	0.00451488	0.00297467	-0.00440918	0.00401972	0.00647575	-0.00468327	-0.00603267	0.00286359	0.00486417	-0.00278512	-0.00266246
TS3-D3	0.0769688	0.00272783	-0.0491718	-0.0176379	-0.00733117	0.0442139	-0.00456005	0.00885426	-0.0202962	-0.00677755	0.0193136	0.00103418	-0.0037646	0.00743244	-0.0310944	-0.00601811	0.00623768	-0.00392341	-0.0051989	-0.00629959	0.0230745	-0.00731561	0.000380164	-0.00079032	-0.00310813	0.0114908	-0.0078818	-0.00840059	0.00187459	-0.00496557	0.00740827	-0.0196555	-0.0060826	-0.0122079	-0.00054832	-0.0011529	0.0125954	-0.00467296	-0.00616823	-0.00395001	0.0111058	-0.00817889	0.00648837	-0.00129223	-0.00568178	-0.00050841	-0.00466998	-0.00453395	0.0013498
TS4-D3	0.124309	0.0792294	0.00853294	0.0535949	-0.0058256	-0.0335106	0.0138679	-0.00196965	-0.0122741	0.0124461	0.0275476	0.0291328	-0.0204937	-0.00807187	0.00864694	0.0122587	-0.00667477	0.0193383	0.0301843	0.000467612	0.000795608	-0.0017969	0.0108948	-0.021585	0.0030177	-0.00217988	0.00299063	0.000974103	-0.00358798	-0.00971566	0.0010761	0.0060169	-0.00925561	0.0100441	-0.0059061	-0.00432285	-0.00355233	4.57797e-05	-0.00233757	-0.000432269	-0.0078206	-0.00301403	-0.00148493	0.00680474	0.0100652	0.00330668	-0.00212453	-0.000934119	0.00352219
TS6-D7	-0.177909	-0.00977378	-0.109687	-0.0786888	-0.0618961	0.0304478	-0.0594752	-0.0272154	0.0377115	0.0160425	0.00778786	0.0300635	0.0114134	-0.0167424	-0.0282765	-0.00482605	0.0382539	0.00580473	0.00554911	-0.00846462	0.0128799	0.0275296	-0.0118545	0.0218992	0.00490952	-0.0143819	0.00159952	-0.00326937	-0.00495427	0.000894782	-0.0038734	-0.000673701	-0.00495141	-0.00475019	-0.00563916	-0.00086009	0.00312014	-0.00407145	0.00193069	-0.0049845	0.000646518	-0.00469901	0.00373664	0.00324741	-0.000543795	-0.00219207	-0.00274884	0.000645956	0.0046123
TS6-H8	0.162443	0.0110831	-0.0493025	-0.00611761	-0.0328493	0.0071152	-0.0301432	0.00572523	-0.0105716	0.0112214	-0.0170677	-0.0232931	0.0126805	0.00129092	-0.0220293	0.00765858	0.00549784	-0.00881795	0.0105944	0.00886744	0.00379068	-0.0171972	-0.0141019	0.0127181	-0.0199809	0.0177205	-0.00906912	-0.002211	-0.00482989	-0.00874586	0.00302086	-0.000571347	-0.00151622	0.0148475	0.00225995	0.0133124	0.00836312	0.00332734	0.00285818	-0.0109241	-0.00531818	0.0107033	-0.00440121	0.0055268	-0.00119013	0.00729916	-0.00420995	0.00642186	0.0115836
WC1-D7	-0.0201512	0.0507384	0.0882606	-0.0183325	0.0192714	0.0503052	0.00696512	-0.028066	-0.0198907	-0.0234709	0.0153004	-0.0113078	-0.0200796	0.0119302	0.00762242	0.00161061	-0.000910422	-0.00687287	0.000319125	0.00501802	0.0178628	0.0199927	0.0143149	0.00182844	0.00881359	-0.00783525	-0.008645	-0.00910807	0.00418295	0.00150662	-0.00223769	0.0121813	0.00369383	0.0032458	0.000103495	0.00330906	-0.00524549	0.00277127	-0.001384	0.00371891	0.00376727	0.00156696	-0.00261875	0.00569358	-0.005938	-0.00877054	-0.00343604	-0.0116978	0.0022776
WC11-D7	-0.0450052	-0.151596	0.0517927	-0.0514881	0.00307001	-0.0404357	-0.0209925	-0.010888	-0.0075283	0.0695616	-0.022347	-0.0068595	0.0174327	0.0109136	-0.00967295	-0.0323076	-0.013117	-0.0015736	0.000873421	-0.000583217	0.000364562	-0.00672991	0.0240306	-0.00567866	0.00350044	-0.00519957	0.0143901	-0.00810981	-0.00296366	-0.00508274	-0.00020296	0.0178464	-0.0011434	0.00266432	0.00781386	0.000795067	0.00262513	0.00842372	-0.0134103	-0.000707039	0.00643123	-0.00332038	0.00700785	0.00275398	0.003382	-0.00332723	0.00270497	0.000867677	-0.00103452
WC2-D7	0.0726967	0.0236304	-0.0153032	-0.0816237	-0.0366515	0.000156871	0.0322536	0.0223101	-0.018212	-0.0248451	0.00896432	-0.000519131	0.00143144	-0.00916401	0.00269189	0.00709587	0.00181187	0.00496096	0.000221223	0.000643322	-0.00248074	-0.00741917	0.0191025	-0.00313269	-0.00125487	-0.00443616	-0.00385181	0.0123518	0.0069009	0.0166353	-0.0023743	0.00796335	-0.00181961	-0.00564281	0.000273137	0.00875924	0.00665038	-0.00748896	0.00292558	0.00866631	-0.00119593	-0.00703636	0.000505953	0.00127795	-0.00408217	0.00142072	-0.00501266	0.00115045	-0.00227141
WC3-D7	0.153809	0.0608401	0.0757603	-0.0605358	-0.022293	0.00817706	-0.00183725	-0.0508623	0.0332142	-0.00554382	-0.0182967	-0.0115847	0.0074435	0.00916794	-0.0118999	0.0353445	0.00332106	0.0262106	-0.0297893	0.0216823	0.000198913	0.00954347	-0.00353528	0.0167879	0.000600832	0.0241074	-0.0176325	0.00924173	-0.000141327	-0.00902081	-0.00963922	0.00455486	-0.0118533	-0.00306577	-0.00314571	0.00150688	0.010276	-0.00376894	-0.00121872	0.00755901	-0.00165645	0.00448012	0.00528671	-0.00837262	0.00241897	0.00311817	0.00440944	-0.00411742	0.00146148
WC4-D3	-0.00147901	0.0316422	0.0817899	-0.0171286	0.00688101	0.0324548	0.010596	-0.0220219	0.00666674	-0.0199802	0.00430092	-0.0305396	-0.021124	0.0081493	-0.0107357	0.0127429	0.00445158	-0.0165262	0.0186485	0.0110601	-0.022203	0.00139425	0.00150063	0.00556171	-0.00381177	-0.0101469	-0.0076673	0.00465134	-0.000561651	-0.00632201	0.0175001	0.0092211	-0.00714329	0.00215825	-0.00689691	0.00415408	-0.000288064	0.00209442	0.00589409	0.00489781	-0.00806892	-0.00534347	0.0101992	0.0030842	-0.00292674	-0.00367385	-0.00871135	-0.00170506	0.000382934
WC5-D3	-0.0267637	0.0258754	0.0301218	0.0128509	0.0127149	0.0176539	0.0243815	0.0310018	-0.0249514	0.00244798	-0.00897329	0.0191008	-0.000794793	-0.000567484	-0.00812365	0.0135815	-0.0241632	-0.0134338	0.00914824	-0.0180696	-0.00491381	0.018613	0.00633151	-0.00652527	-0.0155645	0.00445978	0.000994202	-0.000513095	0.00195637	0.0043366	-0.0100574	-0.00141174	-0.00550771	-0.00955508	0.00764428	0.0117358	-0.00440836	0.00191841	0.00106681	0.0143136	0.00155467	0.00562247	0.00727403	-0.00709964	-0.00709331	0.000988041	-0.00536259	7.129e-05	0.0029452
WC5-D7	0.0163858	-0.0137003	-0.0569455	-0.0416908	-0.00141938	0.0085819	0.0283356	-0.00380602	0.00716791	0.00581548	-0.00302639	-0.000440732	-0.00941106	0.00424808	-0.0143479	0.0176161	0.00819365	0.026683	-0.00646826	-0.00093548	0.00877527	0.00801173	-0.00849986	-0.00639643	0.000788557	0.00461205	0.00377056	-0.00812118	-0.00280261	-0.0101087	0.000755924	-0.00743566	-0.00150337	0.010078	-0.00589874	0.00112233	0.00536789	0.0017537	-0.00258657	0.00196815	-0.00726564	-0.00239625	-0.00691092	0.00395337	-0.00386694	0.00132694	0.00631404	-0.00257411	-0.00133482
WC6-D3	0.0442322	-0.00894419	-0.0580783	-0.0740116	-0.00707665	0.0054237	0.0294069	-0.0034207	-0.0283142	-0.00193054	-0.00606995	-0.0132923	-0.00218807	0.00802394	-0.00319992	0.0211286	0.0142825	0.00329007	-0.0223713	-0.0190588	-0.00184731	-0.00200464	-0.00591158	-0.00383872	-0.0106835	0.00306373	0.0157478	0.00259287	-0.00165964	0.0127643	0.00179873	0.0173264	-0.00324891	0.00633059	0.0128794	0.00820985	0.00546221	0.00256617	0.00669309	-0.00188657	-0.000132404	0.0091031	0.0015691	0.00215696	0.00487481	-0.00758436	-0.00743828	-0.00368878	0.00602908
WC8-D3	0.0983945	0.0418038	0.00127204	-0.0710279	-0.0262014	-0.0315091	0.024861	0.0105231	-0.00978345	-0.0311367	0.000414078	0.0304204	-0.00609504	0.000440495	-0.00226173	0.0134198	0.00327463	-0.00277933	0.00132572	-0.00492124	0.008614	-0.016699	-0.000938421	0.00109337	-0.00758728	0.000359841	0.0135672	-0.00573211	0.00695189	0.0132286	-0.00179718	0.00178404	0.00451181	-0.00479672	0.0081565	-0.00524122	-0.00692346	-0.00513374	-0.00710411	0.00248478	-0.000882022	0.0019511	0.00451505	6.43146e-05	0.00163488	0.00207858	0.00801087	-0.00919906	-0.00320256
WT10-H8	0.116648	-0.153405	0.0635972	-0.0565526	-0.0615115	0.00426291	0.0103172	0.027517	-0.0309856	-0.0269063	0.00528721	0.0264318	-0.015208	-0.0165414	-0.0245856	-0.00288252	-0.0109755	0.000964618	-0.0290361	0.00110952	0.0232562	-0.00767036	0.000854236	0.0290068	-0.0110836	0.0025352	-0.0117619	0.00811314	0.0157422	0.00187153	0.00958703	0.0229443	0.00359864	0.00747945	0.000741788	0.00240678	0.00136146	0.0033632	-0.00190796	0.00857585	0.00120867	0.00394265	0.00172503	0.00316951	0.00172403	-0.00420425	-0.0043719	-0.00274604	0.00200802
WT4-D3	-0.106152	0.00391201	-0.0187314	0.0294321	-0.00857048	0.0282776	-0.00166803	0.0106045	-0.00786157	0.0187581	-0.0277858	-0.00967853	-0.00753821	0.00863052	-0.00343737	-0.0118482	-0.00169099	-0.000810113	0.00467538	0.00917068	-0.00171334	-0.00421099	0.00724824	-0.00736028	-0.00512777	-0.0102985	-0.0166495	-0.0100851	0.00425965	-0.00140312	0.000749146	0.00503319	-4.93304e-05	0.00146902	0.0033922	0.00541362	-0.00056204	0.00679172	-0.00901451	-0.0092035	0.00211618	0.0034195	0.00170727	0.004875	-0.0114319	0.00131967	0.000849589	0.0106605	0.00725911
WT4-H0	0.173587	0.0608481	-0.0268381	-0.0669981	-0.044899	-0.0440473	-0.00323154	0.0115312	-0.0200645	-0.00323022	-0.0117734	0.0256501	-0.01828	-0.0132328	0.0434189	-0.00340195	-0.0218478	0.000794589	-0.00483593	0.000661136	0.00232487	0.014639	0.0203924	-0.0113379	0.0218645	0.00151439	-0.0020082	-0.00289499	-0.00317605	-0.00316782	0.00349381	-0.00754062	0.00445567	-0.00569292	-0.00675609	-0.00204195	0.0040763	-0.00626239	0.002913	0.00236933	-0.000904646	-0.00403252	-0.000949559	0.00366981	0.00502057	0.0113387	-0.000885707	0.00124102	0.0068489
WT7-D5	-0.0153239	0.00385198	0.0136123	-0.0473266	-0.0097055	0.0181024	0.0141526	0.0160971	0.00867577	0.0218743	-0.00659872	0.00112932	-0.00643469	-0.0162216	-0.0121842	0.00015801	-0.00831799	0.00462107	0.00701979	-0.00557776	-0.0202847	0.00538214	-0.00624883	0.0140237	0.00460345	0.000524625	0.00314184	-0.00197601	0.00204951	0.00677083	-0.00741204	-0.0107361	0.006635	0.00177141	-0.00751739	0.00224378	-0.011832	-0.00340294	0.00348993	0.00297169	0.00556157	-0.00357014	0.00706356	0.00317517	-0.00692327	-0.0018192	0.00852694	-0.0151394	0.00666674
WT8-H8	0.250033	0.0175255	0.141711	0.147662	-0.0660759	-0.00268719	0.0041292	-0.0532078	0.0313	0.00715382	0.0165018	-0.0214703	0.0176336	0.0361173	0.0158483	-0.0231193	-0.00350579	0.0176595	0.0211843	-0.0098137	-0.00170289	0.0151523	0.00454539	0.00637728	-0.0119931	-0.0207682	-0.00041706	-0.00549208	0.00126317	-0.0120479	-0.00728413	-0.0045387	-0.00976133	0.000343677	0.00572531	0.00264453	-0.000882279	-0.000508296	0.004389	0.00558174	-0.000660119	-0.00159116	-0.00198344	-0.000258071	-0.00239238	0.00446519	-0.00377416	0.00138558	0.000865772
WT9-D7	-0.271113	0.0220056	-0.0825595	-0.0147281	-0.028766	0.0102999	-0.0581704	0.0286329	0.0437009	0.025513	0.0810627	0.00256463	-0.0242783	0.0659711	-0.00622396	0.0409445	-0.0260772	-0.00540014	0.00256462	-0.00838332	-0.0245771	0.00475611	-0.012678	-0.020204	-0.0123154	-0.00206585	0.000764447	-0.00111987	0.00558764	0.00612593	0.00354252	0.00394888	-0.000818893	0.00348073	-0.00112248	-0.0108155	0.00634708	0.00418762	0.00387614	0.00385	-0.000873343	0.00844191	0.00282421	0.00320916	-0.00525745	-0.000498668	0.00121616	0.000556909	-0.000850728
CS10-D5	0.0230668	0.000735396	-0.0392381	-0.106924	-0.0487662	0.0298153	0.056875	0.0480735	0.0194294	-0.00967934	-0.00700994	-0.0244966	0.0104505	-0.00271858	0.039857	-0.0274368	-0.0300217	-0.00545228	0.00860732	0.00796944	-0.0140382	0.0176725	-0.013287	0.00392148	0.0230356	-0.00738274	-0.0107272	0.0133912	0.00294089	-0.00648037	-0.0014324	-0.00344576	0.00802426	-0.00441465	-0.002365	-0.00417019	0.0071147	-0.000346355	-0.00638356	-0.011172	0.00330334	0.000442111	-0.00415208	0.00165728	0.00382488	-0.00124282	-0.00550167	-0.000519683	0.00157492
CS12-D7	-0.0291395	-0.0269851	-0.0479467	-0.0165723	0.084344	0.0114777	0.0241454	-0.00693314	-0.0193942	0.0523389	0.0209182	-0.0196129	0.032823	-0.0229395	0.0330355	0.0129065	0.00121496	0.000619763	-0.0137984	0.0080466	-0.00801599	0.00182946	-0.00243633	-0.00586111	-0.00648042	-0.0065753	0.00936317	0.0100963	0.0103435	-0.00430368	-0.00690887	0.00233468	-0.00533189	-0.00186488	-0.0094706	-0.0120353	-0.00501735	0.002206	0.00685794	-1.63099e-05	-0.000371593	-0.00666975	-0.00639223	0.00248119	-0.00510284	0.000454114	0.00279506	-0.00605267	-0.00331061
CS4-D7	0.0653885	-0.0345835	0.00910108	0.0773387	-0.00404041	-0.00862143	0.0107885	0.0370548	-0.00736781	-0.0485549	0.012787	-0.039535	0.0301784	0.0124371	-0.00622342	-0.0112121	0.00620607	0.0106501	-0.0145812	0.00171486	0.0169423	0.00296384	0.0113031	0.00327619	0.00995525	-0.000741171	-0.00193976	0.00338931	-0.00828692	-0.00120557	0.00126711	0.00512568	0.00038152	-0.0102309	-0.00117403	-0.00369497	-0.0158534	-0.00102368	-0.00573897	-0.004485	-0.00322635	-0.00285621	0.00552696	-0.00541684	0.0061409	-0.00240908	-0.00133689	-0.00252826	-0.00225103
CS6-H8	0.157769	0.0411125	-0.0753116	-0.0706553	-0.0190253	-0.0667599	0.0060583	-0.00097888	-0.0499723	0.0141516	-0.00883767	-0.00856028	0.00331436	0.0262879	0.0173907	-0.0187095	0.00939203	0.00550253	0.0232749	0.0113081	-0.00220448	-0.0131579	-0.0108361	-0.0059746	0.00119518	-0.0082085	0.00908552	0.0156085	-0.00405277	-0.00351058	-0.00415402	-0.00410347	-0.00327945	-0.00480725	0.00382732	0.000923944	-0.007785	0.00371856	-0.00200548	-0.00442127	0.00450172	0.0106656	-0.00499715	-4.21431e-05	-0.00689052	0.00268501	8.86255e-05	0.00234487	0.00226712
CS8-H0	0.0926484	-0.204696	0.00925533	0.0987077	0.00612295	0.00450756	0.0624112	-0.029478	-0.0246768	-0.0173716	0.0537396	0.0109711	-0.0412435	-0.000968214	-0.00751345	0.0158214	0.00111864	-0.0109736	-0.00619497	0.00599212	-0.000617408	-0.00185653	0.00460135	-0.00147483	0.00320927	0.010704	-0.0159013	-0.00334318	-0.0165543	0.00263594	0.00197403	0.00766747	0.00258519	-0.0127241	-0.00294974	0.00488292	-0.00465335	-0.00391935	-0.00301699	-0.00712731	0.0039114	-0.00679248	0.000294139	0.0011397	0.000305699	-0.00422794	0.0047497	0.00328966	0.00153339
CS9-D7	0.154725	-0.00571311	-0.0635242	0.0361703	0.0682945	0.00218824	-0.0534411	-0.0269398	0.024106	-0.00623099	0.0139679	0.0219155	-0.00529372	-0.0213679	-0.000123609	0.00185893	-0.00977764	-0.00609474	0.00980147	0.0138489	-0.0133194	-0.0107113	0.00582494	0.0139775	0.00778126	-0.00813018	0.0119566	0.0108833	-0.019202	-0.00159022	-0.00627461	0.00122363	0.00318316	0.00281039	-0.00350519	0.0146584	-0.000754939	0.00411825	-0.00186143	-0.00545349	-0.0114805	0.000798988	0.00611704	-0.00125904	0.00361835	0.00397453	-0.00535542	0.00530332	-0.000415483
TS2-D7	-0.0357181	0.0156995	0.0187048	0.00704835	0.0115837	0.013478	0.0434056	0.0156859	0.00593882	0.0209795	0.0101659	0.0082955	-0.00226178	-0.0191465	0.0129508	0.00576413	-0.0139493	0.0102508	0.0193637	0.0069769	0.00816698	0.0114195	-0.00737399	-0.00540502	-0.0089046	0.00460475	-0.009787	0.00168601	-0.00101883	-0.000138407	-0.000647295	-0.00900909	0.00147528	-0.00103862	-0.00320719	-0.000169404	-0.00803537	-0.0107244	-0.00475072	0.00286789	-0.00868601	0.00822989	0.0022434	-0.0120788	-0.00819588	-0.00595328	-0.00342847	0.00154653	0.000165222
TS3-D5	-0.233864	0.0732104	0.0328546	0.00398327	-0.0498521	-0.0126819	-0.000871729	0.00694885	0.0124697	-0.0042612	0.0317404	0.00501357	0.000500998	-0.0423836	-0.00467342	0.00237462	-0.000964662	0.0200602	0.00447402	0.00848601	-0.0109412	0.00550926	-0.0184128	-0.0110271	0.00399894	-0.021038	0.000819507	-0.0140161	0.00235255	0.00798229	-0.0017212	0.00979849	-0.00954289	-0.00766722	-0.00533278	0.00423068	-0.00648448	-0.00938282	-0.0153991	-0.0142569	-0.00472244	0.00538963	0.00927086	0.00434822	0.000629379	0.00579444	0.000692763	-0.00125001	0.00360752
TS3-H0	-0.131954	0.0351292	0.0793225	-0.0342715	-0.0124975	0.00142247	-0.0149393	-0.0289168	0.0448678	0.0146997	0.0187786	-0.0294905	-0.0117242	-0.0191726	0.00531121	0.0115304	-0.0276572	-0.0256696	-0.0242103	0.0163018	-0.0113484	-0.029684	0.0113524	-0.00204021	-0.00921857	-0.00543922	-0.00189223	-0.00378199	-0.0254201	-0.0110788	0.0107661	-0.00333891	-0.000994448	0.00253928	0.00984945	-0.0152936	0.00631854	-0.00736879	0.0022656	-0.000341515	-0.00464595	-0.00463422	-0.00706114	0.00158002	-0.00878513	-0.00154302	-0.00657357	0.000408283	0.00244446
TS4-D5	-0.0439954	-0.0114755	-0.0182516	-0.0256726	0.141573	0.0155982	-0.0115953	0.00911036	-0.03109	-0.0660363	-0.00619485	0.00805134	-0.0555118	0.00340634	0.0484436	-0.00847421	0.0388672	0.0205001	0.0328065	-0.00832106	-0.00620777	0.0101589	0.0046865	0.0070752	-0.00580802	0.0114299	-0.00853172	-0.00984537	-0.0045167	0.00829454	0.00716549	-0.00147907	0.00841212	0.0202769	0.00754885	-0.0231708	0.0111143	-0.00586979	-0.00417052	0.00596317	0.00914072	-0.00229495	-0.00487502	0.00344918	0.0051351	-0.00492337	0.00441499	0.000496569	0.00370643
TS5-H8	-0.218287	0.00390481	-0.0746967	-0.0171322	0.0328062	-0.0324933	-0.0219956	-0.052527	0.000769776	0.0125441	0.0144915	0.00888881	-0.0229751	-0.00899327	0.0185444	0.00460215	0.0174406	-0.0323154	0.00981142	-0.0087898	0.0290768	0.00155564	-0.00062872	-0.00107288	0.0018228	0.0100128	-0.00693211	0.0126017	-0.0075827	0.0208613	-0.000645282	0.000703989	-0.00832474	-0.0060655	-0.0133439	0.0102932	0.00241592	0.000694033	-0.00194739	0.00169022	0.00484792	-0.0128327	-0.00670089	0.00764722	0.00143256	0.0130797	-0.0124736	0.000282704	-0.000486924
TS6-D3	0.0778542	-0.217966	-0.0251375	-0.0747382	-0.0937118	0.0297691	0.0569905	-0.00459841	0.00523024	-0.0126981	-0.011058	0.00496059	-0.00583166	0.0100236	0.035501	0.000449859	-0.00161694	0.00755296	-0.00758663	0.00309301	-0.00626573	-0.0186501	-0.0224083	-0.00399286	0.00510914	0.0164297	0.0114996	0.00318057	-0.000848194	-0.0108971	0.00222179	-0.000320376	0.00762923	-0.0171606	-0.00734866	0.00569311	-1.78609e-05	-0.00489937	0.000541371	0.00284612	-0.00172736	0.00164581	-0.00203233	0.00287708	-0.000945767	-0.000363753	0.00340243	0.00547002	-0.000848461
WC10-H8	0.131082	0.0464702	0.0330028	0.0609616	0.0150734	-0.0817221	0.00913168	-0.0036611	0.0123062	-0.0177513	0.00953056	0.0148492	-0.012499	-0.00136819	0.0110903	0.000103953	-0.00316531	-0.00897653	0.0213864	0.00855427	0.000783752	-0.00811053	-0.00928441	0.00334653	-0.00748374	0.0103578	-0.00561991	0.00106442	-0.00347926	-0.00684735	-0.0135655	0.000739341	0.000153485	-0.0095731	-0.00462082	0.00814828	0.000193318	0.00448125	-0.0111697	0.00243318	-0.00435488	-0.00742918	0.00206128	-0.0040217	0.000721205	-0.00624582	0.00589712	0.000562496	0.00292492
WC4-D7	0.0756257	-0.00845956	-0.0428921	0.000691657	0.0458164	0.0299227	-0.0197863	0.0165287	0.00429286	-0.0107861	0.0298967	-0.00139273	-0.0158949	6.30698e-05	-0.00623852	-0.00915372	-0.00416533	0.00757402	-0.00635465	0.0123203	-4.53142e-05	-0.00441672	0.0107328	-0.00978031	0.00251736	-0.00293686	-0.000434064	-0.00604623	0.0189339	0.00799453	-0.000315692	0.00616991	0.0116133	0.000669613	0.00585397	0.00500793	-0.011916	-9.50184e-05	0.000768883	-0.00028817	-0.012574	-0.00185359	-0.00328476	-0.00778651	0.00335801	0.00176184	-0.0058895	-0.00174115	-0.00628322
WC4-H8	0.0491283	-0.0261022	-0.0307597	-0.00813522	0.00660057	0.0156484	0.00343829	0.00621798	0.0138946	-0.00376796	0.0130626	-0.0254759	-0.0138947	0.00208141	-0.0152261	-0.00190472	0.00679346	-0.0118228	-0.0146503	0.000312391	-0.0115253	0.0034353	-0.00166636	0.0077712	0.00606829	0.00573138	-0.00977009	-0.000644411	-0.013063	0.00578451	0.00475696	-0.00470265	-0.00189975	0.00564064	0.01086	0.00893517	0.00834262	0.000875056	-0.00853322	0.00565043	-0.00529791	0.00127705	0.00453308	-0.00581042	-0.00834815	0.000479407	0.00299943	-0.00390323	-0.000352
WC5-H8	0.119154	0.0151272	-0.0654338	-0.0500924	-0.0357436	0.0289775	-0.00981471	0.0146795	-0.0405903	-0.0188336	-0.00059586	0.000630434	-0.00150301	0.018709	0.00608031	0.00448774	0.00372619	-0.0201824	-0.00255137	-0.0019673	0.0194063	-0.0216354	-0.00689755	0.000992469	-0.00299484	-0.0031171	0.0173807	-0.00852351	-0.00599085	0.00966732	0.00247891	-0.000912925	0.0127049	0.00170448	-0.00750619	-0.0055444	0.0040485	-0.00649759	-0.00681444	-0.00748531	0.000290087	-0.00665417	0.00517267	-0.0143917	-0.00114852	0.00102979	-0.000297134	-0.00382719	-0.00391826
WT10-D3	-0.0398966	-0.0109581	0.00650116	-0.0366849	0.0301149	-0.0101862	-0.00844981	0.01001	0.00329625	0.0204367	-0.0221444	-0.0103633	-0.0173214	-0.00784443	-0.00897279	-0.00960614	-0.0296607	-0.0187576	-0.00112948	0.00374573	0.00954387	-0.000814454	-0.00183396	0.00699416	0.00599871	0.0151687	0.00449686	0.00194535	-0.001527	-0.00057721	0.00967027	0.0052511	0.0027203	-0.0105252	0.00772275	-0.00138858	-0.00777644	0.013282	0.0116105	0.000500873	0.00106756	-0.0028956	0.00665439	0.00417447	0.00471703	0.00677884	0.00669521	-0.00392982	-0.00130792
WT3-D7	-0.146921	-0.00147323	-0.0381205	0.00115083	-0.0263313	0.0226551	-0.0300455	-0.000857997	0.00496095	0.0245873	0.00429669	-0.0072259	-0.0350676	0.0100748	0.0121495	0.00590881	0.0227902	-0.00353477	0.00954908	0.0103428	0.0107433	-0.00359882	-0.0123749	-0.0145415	0.011105	-0.0204614	-0.00946362	-0.00137645	0.00433617	0.0126078	-0.00373578	0.00249801	-0.0055348	0.00492911	-0.00321221	-0.00629576	0.00278451	0.00139559	0.00536239	0.00976235	-0.0121411	0.00318693	0.00299852	0.00134607	0.00760751	-0.00810467	0.000598327	-0.00381017	0.000354255
CS1-D3	0.122243	0.0291447	0.0101938	-0.00264817	0.0311438	-0.0513448	-0.00336646	0.00756864	0.00942298	0.00359021	0.0153403	0.0249444	-0.00930325	-0.0114606	-0.0221421	-0.0158082	-0.0156564	-0.00075367	0.00325359	0.0160926	0.0089607	-0.00272093	0.00782833	0.00594625	0.0180642	0.0090338	0.00675417	-0.00794024	0.00958314	0.00747472	-0.014846	-0.0117947	0.00799337	0.000882536	0.0135783	-0.00195564	-0.00300768	-0.00659252	0.0087824	0.00213755	0.00877431	0.00102448	0.00360084	-0.00362528	-0.00692136	-0.00330369	-0.00541784	0.00294289	-0.000130367
CS3-D3	0.0321759	0.026397	0.0423437	-0.087905	0.00795992	-0.00616559	0.0253199	-0.00814973	0.0240606	-0.0192571	0.00343877	0.0130613	-0.00437352	-0.00256591	-0.01341	-0.027472	0.0121493	-0.0179445	-0.0150869	0.00663133	-0.00218286	0.0162603	0.00160306	-0.00540152	-0.0188024	-0.00114519	-0.0105936	0.00487893	0.000306606	-0.00830336	0.00492384	0.0043415	-0.00803361	-0.00970957	-0.00141612	-0.00787217	-0.00918442	-0.00609346	0.00221807	-0.00538336	0.00407673	-0.00322967	-0.00518848	-0.00524176	0.00953459	-0.0027349	0.0013823	0.00336928	0.00292681
CS5-D3	0.165273	0.0116491	-0.0364731	-0.00147972	-0.00503953	-0.0537507	-0.0241663	0.00372701	0.0152207	0.00565395	-0.0177075	0.00216894	-0.00863402	0.0102715	-0.0194111	-0.00348702	-0.00327232	-0.00105523	-0.00803581	0.00520236	0.0142429	0.0144281	-0.00333553	0.0109747	-0.0145044	0.0116826	-0.00915836	0.0065427	-0.0220294	-0.0164654	-0.00167108	0.0107639	-0.00374172	-0.000303248	0.00746867	-0.00153484	-0.0105037	-0.0118527	-0.00658221	-0.0026906	-0.00111033	0.0064457	0.00457318	0.00482902	0.00776841	-0.000988147	-0.00527045	-1.41703e-05	-0.004682
CS6-H0	0.0485435	-0.00817008	-0.0663618	-0.0365467	0.00230029	0.0046614	0.0275127	-0.0114973	-0.00123444	-0.0137446	0.00665576	-0.00111268	-0.0159597	0.00710432	-0.0224177	0.0129473	0.0145453	0.014293	-0.00462231	-0.00535672	0.00321205	0.013788	0.00791838	-0.011012	-0.00382814	0.00657323	-0.00677118	-0.0135228	-0.00107592	-0.00571689	0.00119295	-0.00232676	0.00520112	0.0077503	-0.00553717	-0.013345	0.00291522	0.00281489	0.00183159	-0.00990595	0.00540406	0.00109868	0.00487993	0.000291287	0.000448179	-0.00255386	-0.00250214	0.00882785	-0.00553924
TS2-H0	-0.150512	0.0524744	0.0588102	0.0107867	-0.0424538	0.0384777	0.00760319	0.00347878	0.0110704	0.00351999	-0.00180755	0.00929201	0.00671419	-0.00638251	0.0176707	-0.0160189	0.0151445	0.00124673	-0.002655	-0.00266534	-0.00193669	-0.0333555	0.0069466	0.00604503	-0.0113638	-0.00675184	0.0146718	0.000850087	0.00679184	-0.0145156	-4.24117e-05	-0.000557939	0.00465663	0.00325499	-0.00232813	-0.00896933	-3.19983e-05	-0.00577877	0.00571323	-0.009322	0.00828612	-0.0059798	0.0076176	0.00652285	-0.00429923	0.000359114	0.000487193	0.00284987	-0.00117758
TS8-H0	-0.0883775	-0.00420588	-0.0257158	-0.0299732	-0.00386429	0.0149614	-0.0108787	-0.00169609	-0.00155111	0.0330618	-0.0228861	-0.00741492	-0.0238298	0.00622757	-0.0160503	0.0130054	-0.00896321	-0.00225179	0.0123963	-0.00791619	-0.00101656	-0.0167225	0.0107893	-0.0102326	0.0149196	-0.00586946	0.00664974	-0.00474054	0.00117864	-0.00616919	0.00332485	0.0169159	0.00138455	0.00125803	-0.00275026	-0.00498733	-0.00709305	-0.0117438	-0.00415736	-0.00591264	-0.00307467	-0.000705842	0.00526584	-0.00540102	0.000521269	0.00537013	-0.000958192	-0.00125794	0.0074477
WC4-D5	0.115962	0.0585431	0.0632575	-0.0516385	0.0201631	0.02018	-0.0116255	-0.0232996	-0.00257108	0.0297429	0.0280125	0.0068579	0.0322706	0.0063745	0.00214621	-0.00704194	0.00789177	0.00513306	-0.0230266	0.0313135	-0.0091238	0.00500958	-0.0176152	0.011417	0.0166431	-0.0170433	0.0198241	0.0064948	0.00431791	0.00267687	0.00389305	0.003943	-0.00100702	0.0108925	0.00499466	-0.000917196	0.000249606	0.00919987	-0.0117353	0.00582331	0.00339047	-0.00383648	-0.0110705	0.00372682	-0.00399722	-0.0019728	-0.0053876	-0.00417076	0.00101425
WT2-D3	-0.0045778	0.00607204	-0.0226453	0.0360424	0.0091573	0.0354647	0.0373997	0.0224907	-0.0371824	-0.00115491	-0.00313806	-0.0217741	0.0143061	0.0136332	-0.00382095	-0.0077151	0.00535614	0.0137121	-0.00933576	-0.0112012	-0.00435608	-0.00583771	-0.0208298	0.000727916	-0.00175518	0.00491287	-0.0023781	0.0109822	0.00218391	-0.00178816	0.00947357	-0.00366852	0.00459276	0.0144645	0.00538231	0.0132961	0.00263797	0.00102016	0.00273208	-0.00713991	-0.00407728	0.000213363	0.00253168	0.00439003	1.3822e-05	0.00809736	0.00254883	0.00265298	0.00608672
WT7-H0	0.222963	0.100303	0.00621934	-0.0174264	-0.0615523	0.0197706	0.0136671	0.00608611	0.0245783	0.0290915	0.0178931	0.0303114	0.0139981	-0.016734	0.00324269	-0.0171188	0.0333238	-0.00379336	-0.00485513	-0.0304525	0.0235544	-0.0075696	-0.000703944	-0.0152812	-0.0181827	-4.08261e-05	-0.00817248	-0.00420955	-0.00537616	-0.00578694	0.00500784	0.00837447	0.0139384	0.000236305	0.00451572	0.00333143	0.00846227	-0.0134782	0.00952758	0.00640786	0.00492291	0.00394716	-0.005621	0.000169216	-0.00550584	0.00216309	0.00574704	0.00159648	-0.0031829
CS2-H8	0.0408139	0.00224079	0.0826472	-0.00142256	0.0258993	0.0355185	-0.021492	0.017702	0.0166981	-0.0186162	0.00867178	-0.00542441	0.0063185	-0.0219286	-0.00500995	-0.00693926	-0.00577244	-0.031789	0.00228805	0.00243056	0.00487622	-0.0120271	-0.00462972	-0.0155355	-0.0169652	-0.0104997	-6.82128e-05	0.0176443	0.0102711	-0.00629196	0.000795174	0.000214801	-0.0100421	-0.00341191	-0.0223289	-0.00545301	0.00720537	0.00215885	0.00902687	0.0078902	-2.10747e-05	0.00340759	-0.000868289	-0.00203644	-0.002863	-0.00203612	0.00415256	-0.00504914	-0.00598034
CS9-D3	0.031714	-0.0678868	-0.0284026	-0.00914071	0.0464523	-0.000579713	-0.000766594	-0.00561052	0.0394544	-0.0146052	0.00615406	-0.0233073	0.0095185	-0.0136804	-0.00102968	0.0103678	-0.00979902	0.0104348	-0.00959702	-0.00993829	0.00542928	0.0140858	-0.000354911	-0.00698775	0.0103159	0.00801628	0.0136562	0.0101677	0.00677513	-0.00823964	0.00696722	-0.00230456	0.00393221	0.00804566	0.00107118	-0.0029124	0.00493598	0.000865426	-0.00486275	-0.00476952	-0.00151451	0.00563865	-0.00794261	0.00322711	-0.00139018	-0.000887196	-0.00624431	-0.000316628	-0.000974278
CS9-H0	0.14179	-0.0205479	0.0656523	0.0596515	-0.0141344	-0.0180774	-0.00702996	0.0121428	-0.00736121	-0.000405383	0.0379196	0.0244723	0.00478589	-0.0110938	0.00599719	0.0156507	-0.0158806	-0.0170602	0.00993461	0.0347293	0.00723898	-0.017501	-0.0219503	-0.0141305	0.0182861	-0.00122193	-0.00631866	-0.0177683	-0.00156272	0.022499	-0.0143739	-0.00591822	-0.00786979	0.00549695	0.0131796	-0.00376313	-0.00181835	-0.00371847	0.00757224	-0.00364316	0.000560918	-0.00702293	0.000781794	0.00707701	0.00484593	-0.00189665	-0.000146639	0.00555798	-0.000784331
TS8-H8	-0.146589	0.000614338	-0.0389121	-0.0306797	-0.0318779	0.0327314	-0.0405188	0.00507615	-0.00347337	0.0307342	-5.61837e-05	-0.0199173	-0.0236313	0.00684237	-0.00399429	-0.0111182	0.0166929	-0.005975	0.00888491	-0.00418808	0.0189142	-0.0295745	0.00400952	-0.00324388	0.0176054	0.00832997	-0.000964084	0.00184381	0.0113893	-0.00214059	0.00384225	-0.0213755	-0.00107329	0.00447439	0.00142923	0.0103309	-0.000423391	-0.00911506	0.000180573	0.0050971	-0.00347848	0.00320625	-0.0049532	-0.00179931	0.00744395	0.000129594	0.0017666	-0.00113027	-0.00348194
WC2-H8	0.104262	0.0366155	-0.00111877	0.0495145	0.0179597	-0.0651864	0.00556169	0.00452188	-0.0347196	-0.000608786	0.00896679	-0.00802317	-0.00459624	0.00406563	0.00808592	-0.00587118	-0.0108986	-0.0086605	0.0102865	0.0234452	0.00636976	0.00393533	-0.000731684	0.0229486	-0.0175469	-0.00358608	0.00764734	0.00329174	-0.00393812	0.00961844	0.0174136	0.00293718	0.0132773	-0.00542714	0.00218481	0.00144948	0.000600263	0.00583244	0.00411035	-0.009978	0.00134601	-0.000670893	-0.00298093	-0.0115258	-0.00442301	0.00491695	0.00243406	0.000821774	0.00175941
WC7-D3	0.0691552	0.0253789	-0.00742191	-0.0626876	-0.0323849	0.0109209	0.0239597	0.0218536	-0.00744668	-0.0233938	0.0111805	0.008907	0.00322588	-0.0122278	-0.011148	0.00969122	0.00456823	0.0115512	0.00271371	0.00630953	0.00864791	-0.0039231	0.0166443	0.00459394	-0.00554621	0.00129623	-0.0103183	0.00273867	0.0140649	0.000692101	0.00218429	0.00621474	-0.00463219	0.00601016	0.00326664	0.00505372	-0.0055586	0.00230815	-0.000333011	0.0147475	-0.00193955	0.000470707	0.00127863	0.00486315	0.000532528	-0.00307671	-0.00316834	0.00159373	0.0016856
WC7-D7	0.0312543	-0.142573	0.166186	-0.0511248	0.00845319	0.0458036	-0.0142438	0.0228894	0.0331884	-0.00445801	0.0467801	0.0500101	-0.00724565	0.0267223	-0.016639	-0.0349213	0.0166465	-0.00969063	0.0102339	-0.0154844	-0.0303689	0.00934824	0.00915853	-0.00546517	0.0172893	0.0120183	0.00479034	0.00379202	0.00281036	-0.0107869	0.00855076	0.00864456	0.00214064	-0.00999191	-0.00383387	0.000642579	0.00274123	-0.0011739	0.00201576	-0.00240015	-0.00238687	0.000357488	0.00100786	-0.00263911	-0.00511764	0.000669731	0.0045874	0.00102942	-0.00191484
WC9-D3	0.139539	0.0611007	0.002129	-0.0519353	-0.0188034	-0.047632	0.0179304	-0.00357458	-0.0205493	0.0139711	0.0159987	0.0249001	0.0200224	-0.00982489	-0.00646399	0.00937944	0.0278865	0.00250961	0.0141387	0.00265237	0.00289102	-0.0055797	0.00135255	-0.00774887	-0.00380442	0.0073987	0.0107831	-0.00868711	-0.00133055	0.00978677	0.00357827	0.0046283	0.00229367	0.00491024	0.000924954	-0.00350072	0.000522751	0.0129172	-0.00798417	-0.00619061	-0.00199902	0.00180391	0.00996828	-0.00146976	0.00523782	-0.0100103	-0.00392748	0.00511519	-0.00118932
WT3-D3	-0.00562202	-0.000834909	-0.0186709	-0.0699017	-0.0136359	0.00658676	0.0248285	0.0142354	-0.00371334	0.0188629	-0.0132258	0.00138711	0.0024392	-0.00536139	-0.00571506	0.00429515	-0.00490432	0.0199796	-0.0038401	-0.0057121	0.00415767	0.010365	-0.0047042	0.00903291	-0.0119656	0.00142986	-0.00439176	0.00772187	-0.0171777	0.00532199	0.00687626	-0.00142793	-0.00118902	0.00441713	-0.00933111	-0.000972751	-0.000597419	-0.00383012	0.0126237	-0.00807773	-0.00111974	-0.00312987	-0.00595533	0.00121329	0.000881579	0.00562904	0.00370024	0.0035091	-0.0047425
WT5-D3	-0.0180644	0.0123817	0.0116604	-0.0753185	-0.0155747	0.0235517	0.0139775	0.0188795	0.00277001	0.0136608	-0.0047915	0.0147847	0.00528643	-0.0156878	-0.00635125	-0.00543274	-0.0094851	-0.00174148	0.00491191	-0.0168646	0.00309703	0.0142235	0.00389485	-0.00538833	-0.0138187	0.0203549	-0.0112514	-0.0112598	-0.00738512	0.00668859	-0.006267	-0.0154869	-0.00219462	0.00627504	-0.00438571	0.00222038	-0.00741107	-0.00243956	-0.0109007	0.00739312	-0.00324812	-0.00738956	0.00599615	0.00590029	-0.000497235	-0.0023977	-0.000245279	0.00367149	0.0023488
WT8-D7	-0.173549	-0.143218	0.102183	0.0227142	-0.0958149	-0.0206562	-0.0460441	0.00240284	-0.0151736	0.00940349	0.0411515	-0.00578754	-0.0138751	-0.0185156	0.0171121	-0.0182773	-0.0364567	-0.00569902	0.00144384	-0.0173938	-0.000269276	-0.0227717	0.0125502	0.0203195	-0.00831981	0.00126651	-0.0243145	0.00542482	0.000650769	3.33969e-05	0.00600848	-0.00811285	0.00631175	0.0110109	-0.00228849	0.000579143	-0.00118991	0.00241488	-0.00268581	-8.54317e-05	-0.00178759	-0.00261437	-0.00717235	-0.0050495	0.000174134	-0.0115882	-0.000642229	-0.00568553	0.00177895
WT9-H0	0.151618	-0.000770018	0.062592	-0.0495694	-0.0239199	-0.0371941	-0.0178054	0.00259871	0.0259586	-0.0296578	-0.0115896	0.00806957	0.0229259	-0.0171543	-0.00261536	0.0286217	0.00185317	-0.0117868	-0.0143868	-0.0126575	0.0113158	-0.00604638	-0.00192623	-0.0104327	0.00570166	0.010193	0.0138414	-0.0142068	0.00028177	-0.0103177	0.0140418	-0.000821848	-0.0099118	0.00472251	0.00146215	0.000749413	-0.0113212	0.0112991	0.00971256	-0.0101265	0.0158803	0.0052943	-0.00419066	-0.00100503	0.00105042	-0.00656805	0.00134557	-0.00538724	0.00470337
CS2-D3	0.151046	0.0300926	-0.0658551	0.021179	-0.00353161	-0.0203298	-0.0176244	-0.0148105	0.00541022	0.0255888	-0.0022996	0.00914099	-0.0277498	0.0147438	-0.0313894	-0.00524961	0.00390034	0.021679	0.00437061	0.00191888	-0.00939103	0.00690412	-0.0105993	-0.00360327	0.00234643	-0.00526979	0.0103668	-0.00309464	-0.00226745	0.000333295	-0.00233391	0.00175854	-0.0118269	0.00176955	0.00936345	0.00242417	-0.00661864	-0.0124797	-0.00287824	-0.00620837	0.00732198	-0.00824817	-0.0016987	0.00599019	0.00159086	-0.0112432	0.00342399	-0.00673302	-0.00259009
CS4-D3	0.120638	0.01246	-0.0480108	0.019122	-0.00687046	0.0192291	-0.0248738	0.0043272	-0.00456921	0.0108427	0.0139967	-0.00293571	-0.0116518	0.0128935	-0.0216402	-0.012994	-0.00207271	-0.0144497	0.00379317	0.00751981	0.000397754	-0.00884843	-0.00515484	0.0117423	-0.00238953	-0.00240982	0.0125719	-0.0078108	-0.0065153	-0.00324492	-0.00322282	-0.0163274	0.0131641	0.00146411	-0.00521976	0.00246231	0.000745342	-0.0062818	-0.00482102	0.00472231	-0.00139295	-0.0038378	-0.00431266	0.0077112	0.00678476	0.00148485	0.00797676	-0.00654392	0.00460727
CS6-D7	0.0549644	-0.0529291	-0.0421012	0.0016541	0.0218335	-0.00819661	0.0128453	-0.0223681	0.0248869	-0.0177066	0.00926557	-0.0261365	0.000905396	-0.00807731	-0.018892	0.0168776	0.00379995	-0.00775661	-0.00152794	-0.0209598	-0.00826148	0.00749453	0.0096749	0.00468627	0.00625633	0.00348249	0.00342789	0.00399656	-0.0145944	0.000125594	-0.00494345	-0.0136177	0.0104979	0.00362823	0.00177613	0.00463113	0.00363908	-0.00850429	0.00325537	-0.0038661	0.0109845	-0.00221747	0.0102856	0.00515389	0.000670268	-0.00379728	0.0034389	-0.00127314	-0.000662586
WT2-H8	0.140262	-0.0862264	-0.0155237	-0.00739879	-0.00391622	-0.0391093	-0.0320844	-0.0307703	0.00143789	-0.0207853	-0.0118142	0.006227	0.0102685	0.0172774	-0.0304946	0.0111827	-0.00591918	0.00560731	0.00485633	0.0116771	0.0134944	0.0208848	-0.00151902	-0.0125593	-0.0113061	-0.015437	0.00942756	-0.0178576	0.0165146	0.00176122	0.0286742	-0.0192237	-0.00806884	0.00130561	-0.00453338	-0.00452103	-0.00445845	-0.00468195	-0.00276574	0.0108805	-0.00380597	-0.00889656	-0.0119633	0.00156168	0.00424327	0.00253415	0.00612074	0.00657325	0.0046665
WT5-H0	0.0838018	0.079715	0.0894794	-0.0781466	0.0531736	-0.00218679	-0.0299158	-0.0473214	-0.00765139	0.0143471	-0.0182532	0.0382974	-0.00360563	0.0159458	-0.0140282	-0.0141556	-0.0147746	0.012646	0.00478069	0.0155441	0.0179485	0.0054702	-0.00552546	-0.0129094	-0.00157423	3.06874e-05	0.0187753	0.0299349	0.00111359	0.0066306	-0.00634553	-0.0113648	-9.87306e-05	0.0122511	-0.00636994	-0.00470777	-0.00197312	-0.00255877	0.00339728	0.000264981	-0.000860322	-0.00193348	0.00985596	-0.00222415	-0.00606017	-0.000326888	-0.000266018	-0.00440423	-0.00384297
CS11-D7	0.0721741	-0.0226898	-0.0335851	-0.019862	0.0648743	-0.0217834	0.0171761	0.00546857	-0.0404283	0.0130413	0.0548068	-0.0624335	0.0144442	-0.00296526	-0.024051	0.00796335	0.0150196	-0.0272317	-0.0215598	0.0227651	-0.00662071	-0.0127564	0.0178211	-0.00695102	0.0174137	-0.00575936	0.00750308	-0.012619	0.0144194	-0.00563829	-0.00152102	0.00831045	-0.014263	0.00111598	-0.000397621	-0.0064866	-0.000525272	-0.0222242	0.00585354	0.00256408	0.0032798	0.00345876	0.00529981	-0.00249322	0.0132566	0.000104118	0.0111531	0.000715056	0.00379816
CS5-D7	0.191539	0.00842769	-0.100758	-0.0246893	-0.0213492	-0.00348987	-0.0249631	-0.0266542	0.0151315	-0.0189017	-0.0275703	0.0110593	-0.00145286	-0.0136102	0.0291146	0.00629347	-0.0100569	-0.0366848	-0.00744497	0.0250249	-0.0126925	0.0202327	-0.00969554	-0.00812102	0.0202808	0.00674565	-0.00766902	0.01013	-0.00377877	0.000604902	0.00747729	0.00205541	-0.00265344	0.00396088	-0.00021377	-0.00460114	0.00469874	0.00466358	-0.00871178	0.00341677	0.010218	-0.00257022	-0.00236723	-0.00462519	-0.00841084	-0.000991727	0.00139923	-0.000677607	-0.00260865
CS8-D7	0.228048	-0.0977485	-0.0601831	0.025285	-0.0638062	-0.0216038	-0.0385614	-0.0498631	0.019122	-0.0106985	-0.0157485	0.0269702	0.039319	-0.00236713	0.00312528	0.00376558	-0.00587007	-0.0118176	0.0239564	-0.0166292	-0.00400888	0.00316169	-0.00726626	0.00155231	-0.00265498	-0.00480109	-0.0165151	0.0134838	-0.00337836	0.0248014	0.00231126	0.014905	0.00418399	0.00953296	0.0131864	0.00031619	-0.00136209	-0.0128222	-0.00277265	0.00334496	0.00312099	-0.00461889	0.00226408	-0.00229773	0.000186982	-0.00215227	-0.000321078	-0.00051452	-0.00417946
TS1-D7	0.373645	0.08143	-0.174242	0.0306725	-0.0832107	0.0167581	0.0281098	0.0416723	0.0818778	0.0256155	-0.0497525	-0.0329427	-0.0649751	0.0102321	0.0043621	-0.0147725	-0.00144858	-0.0106314	-0.0115801	-0.0162427	-0.0117125	0.0140617	0.00924803	0.00222192	-0.00371012	-0.0073802	0.0110428	-0.00391318	0.00733478	0.0176702	-0.00315521	-0.00982083	-0.0027244	-0.00360855	0.000898997	-0.00385249	-0.00452317	0.0110586	-0.00397245	-0.00208902	-0.00192125	-0.000499924	0.000760792	0.000463899	-0.00101914	0.000708862	-0.00536622	-0.000853493	0.00220177
TS1-H0	-0.123999	-0.0081117	-0.0572863	0.0312855	0.039702	-0.00156178	0.0146646	-0.0286458	-0.000218893	0.0143505	-0.0211959	0.031606	0.00653935	-0.018191	-0.00812792	-0.0067232	-0.00217432	-0.0257756	0.00192562	0.00887901	0.0262324	0.0156242	0.0179283	-0.0123725	-0.00547406	-0.00990143	-0.00508246	0.0201935	0.00820554	-0.00797133	0.00257481	-0.0134857	0.00457314	-0.00831303	0.0167701	-0.00856991	-0.000709665	0.00743406	-0.014306	-0.00839644	-0.00713106	0.000802178	0.00395339	-0.00174335	0.00119397	0.00162507	-0.00224178	-0.00612378	0.00629209
TS4-D7	0.00145095	-0.00936361	-0.0710295	0.0408828	0.0297502	0.00151916	0.0545015	-0.017845	0.011208	0.00183972	0.0310581	-0.000757931	-0.00559892	0.00451203	0.0159677	0.0187448	-0.00581061	0.00828792	0.0142623	-0.00674325	0.00792262	0.00268341	0.00477261	0.00283988	0.00133434	0.00706499	-0.00144446	-0.0138083	-0.0148616	-0.00479506	-0.00199017	-0.00719499	0.000267114	-0.000983295	-0.00240204	0.00324837	-0.0111059	-0.0031105	0.00846304	-0.00747624	0.000817616	0.0042211	-3.68468e-05	-0.00839847	0.00210602	-0.00220479	-0.0101894	-0.00547443	-0.00362849
WC10-D5	-0.0102623	-0.00108569	-0.00572745	-0.0400353	0.0271405	-0.00848467	0.0278573	0.0131937	-0.0227858	0.0448074	0.0128617	-0.0120823	0.00852494	0.000183625	0.00360855	-2.36907e-05	-0.00276299	0.00326479	-0.00260837	-0.00738195	0.00675539	0.00361464	-0.0100369	0.00602609	0.0103703	-0.00254255	-0.000453442	0.0142929	-0.0132175	0.00572952	0.00932297	-0.000230026	0.00717797	-0.00920883	-0.00302184	-0.00541099	-0.00163009	0.00151132	-0.00394405	0.00343168	0.00202254	0.00660479	-0.00433215	0.00315061	0.00544325	0.000206433	0.00100578	0.0116651	-0.00234437
WT6-H8	0.126704	0.00646131	0.0403637	-0.000987346	0.0114312	-0.032928	-0.0249531	0.0108267	0.00965506	0.000252784	-0.00415903	0.00743198	0.00346576	-0.0220414	-0.0141218	0.0226363	-0.0180444	-0.000228038	-0.00423102	0.000293329	-0.00726197	-0.00659906	-0.000234109	-0.000942917	0.0217337	0.00496	0.00888602	-0.00381557	0.00897422	-0.000561582	0.0183433	-0.0164348	0.00280538	0.00314526	0.00207294	0.011841	0.00174317	-0.00666198	-0.0152908	0.00829317	0.000353203	0.00701889	0.00331716	0.00570119	-0.0100629	0.000773472	-0.000596218	0.00611141	-0.00531383
WT8-H0	0.121061	0.0552323	0.0450649	-0.074751	-0.0228144	-0.0251947	0.0146144	-0.0316632	0.0260086	-0.0282258	-0.010042	0.0116551	0.00212462	0.0170694	-0.00578238	0.00584733	0.00888715	0.000631492	-0.00175406	0.0253758	-0.011639	-0.0183508	-0.0238518	0.0182154	-0.00657211	-0.00712916	0.00991983	0.00620042	-5.82172e-05	-0.00752452	0.0128886	0.00185457	0.000798646	-0.000892565	0.0188372	-0.0013532	0.000555248	0.00275242	0.0137295	0.00125336	-0.00521677	-0.00668898	0.00151812	0.0045649	-0.000967425	0.00228884	-0.00362487	0.00224724	-0.00567226
TS6-H0	0.0922206	0.124006	0.13058	-0.0486826	0.00161158	0.0750322	-0.0528589	-0.0599652	-0.0325805	0.0681196	-0.0316297	-0.0208194	-0.00257795	0.0135386	-0.00906277	0.0056747	-0.00983897	-0.0068641	0.0309205	-0.0223827	-0.00883166	-0.0183477	-0.0115926	0.000123475	0.0172311	0.0196434	-0.0078542	0.00675675	0.0230868	0.0163135	-4.19066e-05	0.0193793	0.00110495	-0.0103515	-0.000498746	-0.000154009	-0.00415673	-0.000184089	0.0028485	-0.00500064	0.000373496	-0.00255106	0.00174906	0.00143244	0.00862643	-0.000963897	0.0015018	0.00213957	0.00480201
TS7-H8	0.159157	-0.105296	0.00226914	0.135448	-0.0161829	-0.0136493	-0.0365409	-0.0192725	-0.0447949	-0.0258429	0.00510008	0.0259923	0.0180758	0.0147714	0.0174269	-0.0331457	-0.022012	-0.0108838	-0.00287501	0.00368117	-0.00178149	-0.00936347	0.00509969	-0.00149571	-0.0106969	-0.000466519	0.0300922	-0.00936394	0.0117705	-0.0044949	-0.00271608	-0.00331801	0.00111626	0.0141241	-0.00568657	0.00177813	0.00678945	0.00387466	-0.000291258	-0.00113735	-0.00144639	0.0145959	-0.000564743	0.00437535	-0.000334601	0.00505452	0.00201116	-0.00464945	0.00311993
CS3-H8	0.127678	-0.0233748	-0.0723637	-0.0269687	-0.0283718	0.00141147	-0.00648316	-0.00390582	0.0131556	-0.0376941	-0.0117922	-0.0218948	-0.00429211	0.000966087	0.0014125	0.0109909	0.00684184	-0.0180693	0.00781092	0.0119037	-0.0175789	0.0031813	0.00719176	-0.000128852	-0.0137155	-0.0137101	0.00540366	0.00223411	-0.0038044	-0.00872847	-0.00897125	0.00862759	0.00745516	-0.00850306	-0.0244281	-0.0016143	0.00457246	0.00234261	-0.00221565	0.0140934	-0.00526264	0.006997	0.00646174	0.00620903	-0.00313338	-0.00364289	0.00815292	0.00477864	0.00183094
CS9-D5	0.143551	0.0455615	-0.0323958	-0.0513976	-0.0550347	-0.0158525	0.00459691	0.0177558	-0.0189219	-0.0145683	-0.00670466	0.0163364	-0.00922351	-0.00338032	0.0132148	0.0042707	-0.0152171	0.0111954	0.0257275	0.0203222	-0.00371981	-0.00289882	0.00497873	0.00407846	0.0156262	-0.0120851	-0.00394487	-0.00354682	-0.00628699	0.00559103	-0.00489868	-0.00472972	0.00985006	0.00275797	-0.0102765	0.00118267	0.00152396	0.00103944	0.00643591	-0.00483415	0.00444515	0.00811493	0.00191793	-0.00290346	-0.0113551	-0.00335237	0.00664474	-0.00173649	-0.0029924
TS4-H0	0.073625	-0.0560016	0.00694165	-0.0242899	0.0215777	0.0286776	-0.0357621	0.034303	0.010574	-0.0227258	0.00341865	-0.0247529	0.0153985	-0.00384905	-0.0152523	-0.00747628	-0.00134414	0.0100678	-0.00732892	-0.0023306	0.022529	-0.000902019	-0.00509503	0.00966439	0.00373618	-0.0108765	0.00470817	0.0120967	0.00847303	-0.0160738	-0.0084201	-0.00105768	-0.00301374	0.012783	-0.00662736	-0.00122615	0.00257748	-0.00699853	-0.00458024	-0.00434275	0.00784155	-0.0145674	0.00304365	0.00326969	-0.0065392	-0.00572027	0.00108161	0.00261123	-0.00446178
WC8-D5	-0.00960008	-0.023199	0.0664362	-0.0247569	0.0202195	-0.0308446	0.0351999	-0.00493941	0.0457003	-0.0076936	-0.0135458	-0.0192833	5.07826e-05	-0.00552814	-0.0149502	0.0105951	0.00167312	-0.00412292	0.0323865	-0.0280258	0.00942031	-0.0140287	-0.0269002	-0.0157576	-0.00113172	0.00284529	-0.00274894	0.00557267	0.0061393	-0.00602893	-0.00180295	-0.00552477	0.00136129	0.0050945	-0.0122628	-0.00233131	-0.00913836	0.00605071	-0.000879606	-2.00782e-05	0.00189922	0.00622399	0.000243176	0.000157579	0.00173706	0.00418273	0.00815505	-0.000569778	0.00190614
TS9-H0	0.118881	0.0441508	0.0269506	0.0494166	-0.0188833	0.0044916	-0.000361371	0.0127123	0.010817	-0.0034482	0.0359394	-0.000684052	0.00556071	-0.0124724	0.000491739	0.00981213	0.00101885	-0.0109902	0.0329411	0.0283911	-0.009659	-0.0245115	-0.0138429	0.00487209	0.00672421	0.0166142	0.000987466	-0.00219598	0.00285889	-0.00697474	0.00232783	-0.00279883	-0.0051694	0.00131531	-0.0131304	-0.00630011	0.00227686	-1.62634e-05	-0.000958992	-0.0129146	0.000956818	-0.00182267	0.00321616	-0.00455354	-0.000106351	0.00148117	-0.0076451	-0.00520697	-0.000976481
WC2-D3	-0.397524	0.0490862	-0.12726	0.0268393	0.0596354	-0.0872631	-0.0151572	-0.0511363	0.0292673	-0.0483903	0.00563297	0.0226606	0.0223477	0.000858527	-0.0142093	-0.0253513	-0.0247415	-0.00186929	-0.032175	-0.0204211	-0.00885934	-0.000678004	-0.0233963	0.00575263	0.0138108	-0.021406	-0.00861362	-0.0225477	0.00201578	0.00793907	0.00206043	0.0127879	-0.00161243	-0.00529148	-0.00702659	0.00244168	-0.00187216	0.000322737	0.00292591	-0.0027163	-0.00714916	0.00823624	-0.000418132	0.00631347	-0.00410333	-0.00404241	-0.000477479	-0.00416287	0.00155746
WC9-H8	0.0928813	0.0363289	0.00527624	-0.0436443	-0.0283325	0.00892683	0.00953312	0.0161281	-0.0180151	-0.00704604	-0.00457248	0.0249089	-0.00583503	-0.0138901	-0.0245522	0.0336165	-0.00437827	0.0142082	-0.00730055	-0.0217611	-0.000810947	-0.00203764	-0.00757928	0.0141905	0.00501177	-0.00526527	-0.00312287	-0.0189456	0.00988269	-0.00713323	-0.014592	-0.000943779	-0.0228328	-0.00383743	-0.00408606	-0.0137437	0.00845594	0.00258365	-0.00852443	0.00358753	-0.00570913	0.000569194	-0.00776817	-0.0124766	-0.00233837	0.00352935	-0.000572382	0.00418513	-0.00132947
WT9-H8	-0.0045037	0.0814949	0.11256	0.00526875	-0.00137571	0.0564161	-0.0268308	-0.0293388	-0.0359501	-0.0255045	-0.0184555	0.0184687	-0.0209152	0.0157954	0.030083	0.00842255	-0.000877617	-0.0080006	-0.0206719	-0.0281695	0.00522459	0.0106426	-0.0169126	0.0239292	0.0116221	-0.00753565	0.00481371	-0.0172685	-0.0013401	-0.00107828	-5.28113e-05	-0.00385254	-0.021131	-0.000643362	0.000517546	-0.0101846	0.00978794	0.00164492	-0.00415221	0.0033645	0.00322506	0.00533527	0.00238324	-0.00332818	0.000325656	0.00543796	-0.00313572	0.00331812	-0.00348607
TS3-H8	-0.242723	0.0555783	-0.00635884	-0.00323503	-0.0277186	-0.0459725	-0.00330685	0.0128215	-0.011414	-0.000255353	0.0213266	-0.0106714	-0.0106373	-0.0213225	-0.00656035	-0.009681	-0.0258411	0.0259758	0.00539484	0.0105815	0.00964601	0.0196963	-0.00789834	0.00651805	-0.00757859	-0.0136364	0.00134423	0.00632633	0.00445644	0.00457399	0.0115363	0.00127245	0.000875788	-0.00941208	0.00305307	-0.00538983	0.0124834	-0.00731188	0.00590527	-0.00202529	0.0109299	0.00767493	0.0114824	-0.00741713	0.00589899	0.000547417	-0.00306937	0.00280619	0.00353526
WT6-H0	-0.076682	0.0309343	0.0499082	-0.0159398	0.0508913	-0.0221229	0.0402799	0.00507866	-0.0106191	0.0228713	-0.00894841	0.0120415	0.0135925	-0.00522039	0.027527	-0.0135197	0.0117638	-0.00722181	0.00895752	-0.00408675	0.0193213	0.00219338	-0.00976204	-0.00324333	0.00142688	0.00583899	0.0149814	-0.0280113	0.00773137	-0.00107048	0.00113653	0.0135189	-0.00133551	0.00905624	-0.00846187	0.00942551	0.00042002	0.0142109	0.00587413	0.0025142	-0.00352546	-0.00440839	0.00764539	-0.00447969	-0.00410899	-0.00386257	0.00136834	0.0078968	0.00632911
TS1-D5	0.0792188	0.0854571	0.0915941	-0.0999824	-0.0139187	0.0454727	-0.0450348	-0.0531207	-0.0283103	0.0104011	-0.021769	0.00689322	0.0171228	0.0123562	-0.0256012	-0.00664714	-0.013612	-0.0159054	0.00585166	0.0142574	-0.00465107	0.0123785	0.00307208	-0.00446931	-0.0192695	0.0145804	-0.00751507	-0.0120369	-0.0101797	0.0186932	-0.00387438	-0.00737585	-8.90126e-05	-0.00187063	-0.0142834	0.00759353	-0.00322454	-0.000145869	-0.0114041	-0.00922324	-0.00190232	0.00577884	-0.0104959	0.00385105	0.00192144	-0.00300965	0.00471941	0.00154932	0.000362812
WC8-H8	0.185526	0.0385543	0.112003	0.0540697	0.000979603	-0.00978576	-0.00230132	-0.044355	0.0324204	-0.00719972	0.0187959	-0.0336222	-0.00160671	0.00967488	-0.00616189	0.0415994	-0.0150671	-0.00187396	-0.019572	-0.0135449	0.0237634	-0.0109304	0.0126108	-0.0131651	0.0153468	-0.00429561	-0.00256469	-0.00579218	-0.0116476	0.00922608	-0.00584354	-0.00530763	0.0214655	-0.0102148	-0.00414475	-0.00823713	-0.00151514	0.00849505	-0.00369016	-0.00806312	-0.000430852	-0.00136823	-0.000118286	0.000244395	0.00172387	0.000292958	-0.00674064	-0.0053216	-0.00124163
WC1-D3	0.150572	0.0244889	-0.0456431	0.083494	0.011922	-0.0371301	-0.0223779	-0.0215983	-0.00289584	0.0183077	-0.00801089	-0.0201828	-0.0293217	0.00734107	0.00961587	0.0158757	-0.00151847	-0.0096746	0.00750494	0.00535367	-0.0101502	0.000779978	-0.0112046	-0.0183853	-0.00918627	0.00455347	0.00425675	0.0104335	-0.00768908	0.00457163	0.0151238	0.00842056	-0.0210594	0.00808934	0.00278179	0.00354636	0.0143785	-0.00262588	0.000915189	0.00592033	-0.00592783	-0.00197918	0.00115663	-0.00339888	-7.18634e-05	-0.00435688	-0.00436619	-0.00332735	-0.00941528
TS5-D3	-0.00647886	0.00267996	-0.0128523	0.00594174	0.00647601	0.0350027	0.0209178	0.0231861	-0.0126428	0.0133474	0.0111648	-0.0115392	-0.00845711	0.00426613	0.000387711	0.00196472	-0.0228378	0.000930533	0.00781727	-0.00982507	0.0156764	-0.00726068	-0.0160669	0.000175343	-0.00805369	0.00330305	-0.0147347	0.0148972	-0.00614613	0.000444602	0.0056801	-9.85804e-05	0.000779718	0.0106486	0.00166853	-0.00798549	-0.00639798	0.00121556	0.00274978	0.00238384	0.00151162	-0.00520422	0.000208172	0.00468373	0.00164335	0.00138034	-0.00159606	-0.00145997	-0.0050462
TS9-D5	0.010143	0.0196323	0.0228116	0.0232561	0.00798514	-0.00260482	0.0480675	0.0138231	0.00401847	-0.00931924	0.0208366	-0.00412759	-0.00832139	-0.00968141	0.00190382	-0.00193452	0.00308627	0.0118552	0.00468953	0.00919775	-0.0197092	0.0124892	0.00024306	0.00891384	0.000366076	0.00219486	-0.00892048	0.00841092	0.0122526	-0.00134033	-0.00206684	0.00573547	-0.00216331	0.00102297	0.00856732	0.00199568	0.0103857	-0.00773567	-0.00569639	-0.0134034	0.00401913	-0.00169195	-0.0121472	0.00229092	-0.00101608	0.000427423	0.00746869	0.000201219	0.00284249
CS1-D5	0.0621344	-0.0104843	-0.0299944	-0.0482618	0.0312731	0.031182	-0.0219677	0.0275567	-0.0053739	-0.0124144	0.00949739	0.0122993	-0.00952773	-0.000263359	-0.0111002	-0.0147626	0.00341873	0.0201783	-0.0202019	0.0120899	0.0112914	0.00937776	0.000743791	8.59266e-05	-0.00222844	-0.00178855	-0.0141033	0.00683326	0.00211723	0.00227949	-0.000923877	0.00625003	-0.0217763	-0.00663877	0.00305155	0.00427371	-0.00138062	0.0108199	-0.00188407	-0.0116292	-0.00117712	-0.00394266	-0.00323609	0.00426844	-0.0059338	0.00149292	0.00634342	-0.00216695	0.00376833
TS5-D5	-0.0940875	-0.0515539	0.0110536	-0.0629075	0.0983265	-0.0460526	-0.0605579	0.0504976	0.0758845	0.0076172	-0.0230957	-0.0124712	-0.00833215	0.0280791	0.0226438	0.00055827	0.0028598	0.0149831	0.00780031	-0.00791815	-0.00219187	-0.0218266	0.0143333	0.0181502	-0.00306198	0.00101209	0.00018405	-0.00941956	-0.0187394	-0.00328733	-0.00464691	-0.00425448	-0.00388372	-0.00496339	-0.00347858	0.0157078	-0.000196561	-0.00709603	-0.00364111	0.0020348	0.00507619	0.00371903	-0.000749254	-0.00374377	0.00245638	0.00190127	-0.00361746	0.00114899	-0.0012391
TS7-H0	0.00418776	0.0336206	0.0680243	-0.0787368	0.0429908	0.0451885	-0.0405152	0.012989	0.000666045	-0.0227996	0.0238591	0.0148803	-0.0217555	-0.0280665	-0.00053337	-0.0223701	0.0168604	0.0162359	0.00494228	-0.00968056	-0.013061	-0.00764692	0.0170556	-0.00354009	-0.00146696	-0.0224438	0.000984179	-0.00854253	-0.0151188	-0.000339119	-0.00405486	-0.011246	-0.000981321	-0.00495077	0.00995858	0.0145812	-0.000368487	0.00436147	0.00657917	0.00342987	0.00469605	0.00114422	-0.00474493	-0.00158434	0.0066172	-0.00460663	-0.005752	0.00342168	-0.00290891
WC6-H8	0.175251	0.0527962	0.0276236	0.074932	0.0157576	-0.0834044	-0.00421595	0.00708377	-0.0423982	0.0430467	0.00105949	-0.0320278	0.0124946	-0.0230504	0.0222958	0.0274301	-0.000948044	-0.0133628	-0.00505073	-0.0221226	-0.00899671	0.00195097	0.00695108	0.0100697	-0.0167988	0.00180283	-0.0144339	0.00382822	0.00540266	-0.0165047	-0.00774821	0.00213268	0.00626278	-0.0131233	-0.00170628	0.00132133	0.00608867	-0.00780735	-0.00184736	0.00766267	0.00276705	0.00320689	-0.000797671	0.00988357	-0.00322109	0.0028478	0.00287529	-0.00693765	-0.000100958
TS10-D5	0.0600234	0.0248398	-0.0497629	0.0749019	-0.00432387	0.0265617	0.0198144	0.0179367	-0.0414103	-0.0350916	0.0179204	-0.0101013	0.0030532	0.0159187	-0.0165308	-0.015774	0.0148277	0.0134619	0.00417424	0.0103815	0.0134294	-0.0115054	0.0166636	-0.0126573	0.00423338	0.00380117	0.00522958	-0.0016074	0.00121066	-0.0039268	-0.0027978	-0.00658731	-0.00636001	-0.0103913	-0.00699237	0.00297819	0.00538318	0.00397992	0.0015888	0.00712422	-0.0105013	-0.00495168	0.00525339	-0.00365809	0.000163519	0.00553702	-0.00343645	0.00230574	0.00106097
CS4-H0	-0.0458443	-0.0102269	-0.0350627	0.0252736	0.0367772	0.0168496	0.0316755	-0.00937668	-0.00460829	0.0048973	-0.012717	0.00669105	0.000621851	0.0039371	0.0161419	0.00405606	-0.0132155	0.00550354	-0.00939833	0.00462924	-0.00493558	0.0280156	-0.00956146	-0.0166909	-0.0138116	0.00347494	0.00636497	-0.00101546	0.00272517	-0.00367258	0.0230017	-0.0140618	0.00152992	-0.000555633	-0.00382625	0.000158726	-0.0103904	-0.00486931	-0.00677239	0.00583045	0.000803965	0.00507789	0.00957689	-0.00532284	0.0065966	2.42558e-05	0.0026315	0.00563845	-0.00441774
TS9-D7	-0.235272	0.0110811	-0.0683197	0.0242524	-0.0319875	0.0321372	-0.041302	-0.00570997	0.016963	-0.00134263	0.0345163	-0.0331337	-0.0112351	0.00299657	0.0193424	-0.0208547	-0.00483012	0.0025405	-0.00375081	0.0214449	-0.0178061	0.00360397	-0.0140893	0.00170733	-0.0268267	0.023264	0.00641509	-0.00988078	0.0234402	-0.00501135	0.00168526	-0.00606985	0.00465148	-0.00398324	-0.00590143	0.00373533	-0.0019061	-0.00172669	0.000435136	-0.00162697	0.00786514	-0.00603196	-0.0118125	-0.00134688	0.000550663	-0.00196886	-0.00555114	0.00106851	-0.000538384
WT2-D5	0.0153547	0.0360746	0.04269	0.0181198	0.0146552	0.0212187	0.0269952	0.019444	-0.0208599	-0.0185492	0.0160283	0.0201556	0.0025064	-0.0134291	-0.00301785	-0.00635982	-0.00461248	-0.00957965	-0.0123835	-0.00370564	0.0036029	0.00266426	0.00558824	-0.0115001	-0.0118918	-0.00968156	0.000340599	0.00899438	0.00848724	0.00206404	0.00295113	0.00620121	0.000516676	0.0131119	-0.00391457	0.0070701	-0.00575641	0.00535021	-0.0105487	-0.00120326	0.00614873	-0.00998445	-0.00139851	0.00128687	0.00670992	-0.00107265	0.0012667	0.000325134	0.00287569
TS8-D5	-0.166265	-0.0639747	-0.0288488	0.0797595	-0.0249384	0.0163041	-0.0487285	-0.00803076	0.0474336	-0.0287053	-0.0175705	-0.0434732	0.0534823	-0.00914107	-0.00261469	0.011969	0.022797	-0.00699382	0.0179163	-0.0122838	0.0144825	0.0156281	-0.00828025	-0.00420747	0.0131989	-0.0060771	-0.0037519	0.00825737	0.00920761	0.00251143	8.7344e-05	-0.00319035	0.00382383	-0.00136396	-0.00786664	-0.002204	-0.00486675	0.00841549	-0.000887557	4.09356e-05	0.0036868	0.00360708	-0.00133192	-0.00408203	0.00358362	-0.00139788	-0.00135841	-0.00201727	0.00521534
WT2-H0	-0.0861284	-0.00309591	-0.0157976	0.0105472	0.0589163	-0.0169739	0.0181138	-0.000160778	-0.00699933	0.0118876	-0.0418677	0.0150866	-0.00887333	0.0224014	0.00174376	-0.0164108	-0.0164023	-0.00946726	-0.0135489	-0.00418611	0.0195851	-0.00916554	-0.00230947	-0.0197865	-0.00563815	-0.00864162	0.00486054	-0.0263779	0.00757178	-0.00307403	-0.00252755	0.00805809	0.00159445	0.00394382	-0.00870189	0.0175755	0.0123157	-0.00191532	-0.00730756	-0.00261425	0.00425131	0.00194791	0.00146467	-0.000684232	-0.00699806	-0.00196003	0.00380935	-0.00605565	-0.00459389
WC1-H8	-0.0846679	-0.00495653	-0.0840013	0.0714599	0.0219386	0.0298947	0.0518172	0.0363302	0.0432143	0.0258183	0.0224799	0.0537054	0.0486692	0.0705198	-0.00508733	0.0397518	-0.00757117	-0.00873709	-0.00488468	-0.000436351	-0.00200515	-0.00623168	0.0224322	0.0145071	-0.000658247	-0.00374145	0.000886538	0.0169352	0.00833235	-0.00474147	-0.00877444	0.00362227	0.000305856	0.00321586	0.00444671	0.00649909	0.0157198	0.00249682	-0.00190723	-0.00890395	0.00112107	-0.00275998	-0.00112933	0.00563894	0.00567503	0.00560608	0.00181001	-0.000670377	-0.0010332
WC3-D5	-0.092846	0.0274593	0.0549848	0.00513035	-0.0114229	0.0266718	0.0128759	0.000675796	0.0363555	0.0137243	-0.00441849	-0.0102113	-0.00326853	-0.014368	0.0189134	-0.00630382	0.0129503	-0.00604591	0.0177324	0.0213208	4.27604e-05	-0.000252918	0.00911329	0.0104855	-0.00771819	0.00968203	-0.000560933	-0.013084	-0.00465072	-0.00125195	0.00881053	0.0103046	-0.00988446	-0.00677466	0.00720722	0.0102983	0.00343066	0.0158321	-0.00452403	0.0029469	0.00924683	-0.00159917	-0.00344707	-0.00566118	0.00643197	0.00690128	0.00868847	-0.00552103	-0.00861037
WT1-H0	-0.0866578	0.00714344	-0.00167277	0.00278413	0.000327935	0.0121494	0.00517046	0.00796279	-0.0200595	0.0172716	-0.0226149	-0.00736026	-0.0247192	0.00371344	0.000769756	0.016852	-0.0150552	-0.00352491	0.0165946	-0.0111576	0.00250638	0.00412634	0.00107587	0.00624245	-0.00252638	-0.012529	-0.000197973	-0.0109101	-0.0144744	-0.0114046	0.00125711	0.0158541	-0.00891811	-0.00565643	-0.00120406	-0.0157812	-0.00284657	-0.00321583	-0.00243866	-0.00525827	-0.00683718	-0.00110642	0.000507463	0.00167133	-0.00898443	-0.00686815	0.00190901	0.00207694	-0.000392148
WT3-D5	-0.174331	0.0434861	0.0287972	-0.00764937	-0.0125007	-0.0328112	0.00621962	0.012326	-0.043192	0.0481312	0.00516749	-0.0214328	0.0278153	-0.0205157	0.0210743	0.0075461	0.0325514	-0.00876243	-0.00670282	0.00464228	-0.0141767	-0.000186037	0.0194195	0.00285843	-0.000716345	0.00620902	-0.00145851	0.00345015	0.0154862	-0.00102298	-0.00742799	-0.012747	-0.00334153	-0.00312138	0.00972276	-0.00146195	-0.00397165	0.000362943	-0.010867	-0.00109387	-0.00502185	0.00628558	-0.00188153	0.00529787	-0.000445106	-0.00435412	-0.00978191	0.00363847	-0.00846893
WC7-H8	-0.00773281	0.0370719	0.0579524	-0.0701778	0.0137535	0.00588088	0.0270575	-0.0268328	0.00430038	0.00146389	-0.00627178	-0.00170695	-0.0197857	0.0110082	-0.0276461	-0.00999213	0.00751373	-0.00588086	0.0135316	-0.0268544	-0.0148822	0.000498487	-0.00486045	0.00484324	0.0038384	-0.0114253	0.0167215	-0.00154596	0.00275536	-0.0145741	-0.0059315	-0.00198105	0.00972866	-0.00469105	0.0129912	0.00415686	0.00237146	-0.00113329	0.00868725	0.00174282	0.00329518	-0.00433984	0.00067654	-0.00113018	-0.00268119	0.000246345	-0.00418041	0.0010042	-0.00112762
CS6-D5	-0.0102664	-0.0206373	-0.0601131	0.0535067	0.0104355	0.0293184	0.0397026	-0.0123667	0.0223967	0.00613775	0.0141205	-0.0115318	0.0102207	-0.011255	0.0217421	0.00927865	-0.0104047	0.00302833	-0.00172228	0.00579266	-6.74707e-05	-0.00824529	-0.00784079	0.0259843	-0.00650673	-0.00431233	-0.00165555	-0.0117587	-0.0042356	0.00158238	-0.00975311	0.00046571	-0.00379973	0.00396083	0.00871846	0.00132789	-0.000150384	0.00183578	0.00583586	0.0032269	-0.00786605	-0.00772073	0.00721077	0.00624445	-0.000662538	-0.000678955	0.00674879	-0.000694093	0.0081312
WT11-D7	-0.0811352	-0.0832899	0.0651994	0.0445384	-0.0236015	-0.023643	0.0156178	0.00359285	0.00923592	0.0166332	-0.0335159	-0.0159117	0.0367663	0.00761188	-0.00556604	-0.00685525	-0.0216956	0.0164002	0.0295363	-0.0043093	-0.00987894	0.0167496	0.0264669	-0.00275756	-0.0138993	-0.0208562	-0.0068372	-0.0129669	0.00827029	0.0151783	0.00341051	0.0123152	-0.00457054	0.00949344	0.0054276	-0.00237721	0.0126798	-0.0122285	0.00468129	-0.00498434	-0.000270797	-0.010454	-0.00199223	-0.00805741	0.000926768	0.0143825	-0.000766283	-0.00234857	-0.0055744
WC2-D5	-0.221057	0.0797789	0.0686863	-0.0142415	-0.0095981	-0.0405604	0.0117877	-0.0271969	0.0134438	-0.00547683	0.0107866	0.00962263	-0.00446487	-0.00535155	0.00695018	-0.0178048	0.0205878	-0.0166273	-0.0238049	-0.00290582	0.014909	-0.0133285	-0.0131148	-0.0146916	-0.00730984	-0.0244629	-0.0084238	-0.00268181	-0.00955705	-0.00905599	0.00464785	-0.00919238	0.0120562	0.00301019	0.00129388	0.00761482	0.00859796	-0.000160015	0.000833264	0.000456341	-0.00144867	0.00247823	-0.00569757	-0.00909817	0.00624821	-0.00104279	0.00386743	-0.00279911	-0.00785404
WC9-D7	-0.1987	0.0390954	0.00599281	0.00433592	-0.0304451	-0.0196151	-0.0129594	0.0172577	-0.0429491	0.0195486	-0.000202648	-0.0156619	0.007765	-0.0136756	0.00442584	0.00867144	0.00805399	0.00888633	-0.0204097	0.000504129	-0.00256682	0.00597448	0.00653612	0.00287418	-0.00278367	-0.00238786	0.00540982	0.0107926	-0.0120219	0.0213817	0.00748209	0.00263237	0.0168344	0.004592	-0.0140322	0.00625777	0.0116579	-0.00349559	0.00502379	-0.00262615	-0.0082434	-0.00443184	-0.000769109	-0.0118645	-0.00265213	-0.00382601	0.00180228	-0.00227463	0.0089889
WT10-D5	-0.128612	0.0276275	0.0165653	0.0167286	-0.0125036	-0.005862	0.013737	0.0162713	-0.0120664	0.00986491	-0.0286032	0.00614908	-0.00663119	-0.0117661	-0.000438677	0.0143325	0.00418007	0.0144671	0.00775624	0.00841	0.0066353	0.00545883	0.0207093	0.00759487	0.00951048	-0.00825548	-0.00232025	-0.00405982	-0.00163899	-0.00519252	0.00593542	-0.00051747	0.00585564	0.00420453	-0.0111135	-0.000355987	0.0143437	-0.00499079	0.00503084	0.00600351	0.00907635	0.00485877	0.00538249	0.005753	0.00628365	-0.00476048	-0.00918201	-0.00113733	0.000254501
TS7-D7	-0.297813	0.0303721	-0.105635	0.00178078	0.0117919	-0.0238178	-0.00574641	-0.0557658	0.0094408	-0.00992916	0.0330651	-0.00664372	-0.0106885	-0.0124944	0.00703229	0.00981038	-0.0155772	0.000968171	0.029328	-0.00257993	0.00741291	0.0086527	0.00909844	0.00910599	-0.0182291	0.00630709	0.0039249	0.0108964	0.0136544	-0.0144985	-0.00364305	-0.00494203	-0.00099564	0.00871019	0.017836	-0.00370315	-0.00311771	0.0075961	-0.00389495	-0.00560982	-0.0051488	-0.000439348	-0.000244985	-0.0109662	0.00141032	-0.00684366	0.010926	0.00553327	-0.000705731
WC10-D7	0.0513773	0.00778935	-0.0476079	0.0601132	0.00412523	0.0247532	0.02052	-0.00345441	-0.0256632	-0.0269212	0.0239862	-0.0142455	-0.0220722	0.00880034	0.000934175	-0.00130492	0.00188139	-0.00420155	-0.00680521	-0.00893508	-0.0130428	9.80103e-05	0.0125567	-0.00100693	-0.0142868	-0.0124451	-0.00106155	-0.0101632	0.00953712	0.0107478	-0.0100537	-0.0013078	-0.000812811	-0.00535868	0.00137921	0.00145023	-0.00107005	0.0158531	0.00145289	-0.00673917	0.0090626	0.000862859	0.00266594	0.00528426	-0.00386541	-0.010967	-0.00214362	0.00556818	-0.00354986
WC3-H8	-0.103336	0.0130526	0.0476433	0.0119998	0.00905775	-0.00498812	-0.00419071	0.0223968	0.000180596	-0.00647971	-0.0241561	-0.00682437	-0.00136346	-0.0380559	0.0131553	0.0095232	-0.011572	-0.0126189	-0.0193977	0.0111327	-0.0023305	0.0040303	0.0114758	0.0128244	0.015288	0.0216242	0.0159081	-0.01785	0.00302038	-0.00109308	0.000546746	-0.000650227	-0.0106919	0.00893171	0.000122805	-0.00284367	-0.000537454	-0.00915554	0.00336766	0.00328577	-0.00612397	0.000650119	0.00133753	-3.61992e-05	0.00245072	0.00463869	0.00122724	0.00361918	-0.00192936
TS7-D3	-0.0857029	0.000669934	-0.0352213	0.0489524	-0.00374975	0.0490121	0.00865932	0.010138	-0.0127483	0.0125534	-0.0358039	0.00187128	0.00957951	0.00730747	-0.0191825	-0.0248325	0.000574105	-0.00352034	0.00562907	0.00621338	-0.00665012	-0.0122748	0.00838256	-0.0272728	-0.0150661	0.0107283	-0.00092991	0.00302633	-0.000600138	0.0101589	5.46375e-05	-0.00770158	-0.00129651	-0.0147373	0.00378518	-0.00992802	0.0137426	0.000962724	0.00200686	0.00504978	0.00179569	0.000733596	0.00770454	0.0101469	0.000267517	0.00294368	-0.00594863	-0.00564393	0.000812176
TS10-D7	-0.195412	0.00113566	-0.0660635	0.0314335	-0.0157443	0.039934	-0.0298534	-0.0208518	0.00843253	0.0039016	0.015813	0.00347912	-0.00792787	-0.0108357	0.0285121	-0.00199293	0.0231094	-0.0106871	0.0114509	0.00588738	0.0034479	0.0217335	-0.00777509	0.0185719	0.00174995	-0.0014848	0.00514429	0.000488839	0.0107354	0.00287799	-0.00265195	0.0137946	0.00463008	1.50842e-06	-0.0048098	0.00848362	-0.00578904	-0.00989235	0.00180425	0.000555884	0.0140419	0.00103164	0.0136895	-0.0030908	-0.00492069	0.00705775	0.00086624	0.00373003	-0.00199433
WT10-H0	-0.161567	0.00519635	-0.0640545	0.0173048	0.0540727	-0.031953	0.0512389	-0.0346936	0.00508942	-0.00760529	-0.0525044	0.0325603	0.0191053	0.034253	0.0159224	-0.00205233	0.00119867	0.0059988	-0.0168458	-0.00749504	-0.0327386	-0.0433253	0.0154119	0.0146314	0.00342983	-0.017222	-0.0211284	0.00393715	0.00695841	0.00766284	0.0324949	-0.0148946	-0.016936	-0.00513976	-0.0137763	0.00504271	-0.0115256	-0.00722148	0.00909087	-0.00161602	0.00152074	-0.00514652	0.000632258	-0.00217591	0.00327453	-0.0100349	-0.000249208	0.0058998	0.00235548
WC10-D3	0.015984	0.0347527	0.0243241	0.0368888	-0.00786737	0.0287929	0.027179	0.0292838	-0.0337839	-0.0042582	-0.0144513	0.0203902	0.00754133	-0.0074009	-0.00620505	0.0060642	-0.0227878	0.0053229	0.000964308	-0.0161534	-0.00406892	-0.00582732	-0.0288464	0.0173771	-0.000991756	-0.010607	0.0101498	0.00849961	0.0044756	0.00563688	-0.0154978	-0.00730921	-0.00336317	-0.000244051	-0.00340401	-0.00254015	0.0102598	-0.00601343	0.000117771	-0.00259131	0.00351219	0.00830905	-0.0031271	0.000632162	0.00978297	-0.000880933	-0.0025619	0.00189762	-0.0088896
CS7-D7	-0.0326041	0.0223949	0.139229	-0.0164569	0.040635	0.0225013	-0.032143	-0.0358636	-0.00206804	-0.0652929	0.0143498	-0.0497405	-0.0151315	5.95444e-05	0.016392	0.00450068	-0.0056564	0.0161912	-0.0196505	0.00246439	-0.00158071	0.0162487	0.0201272	0.00578093	-0.00457971	0.0162928	0.00797429	0.0269074	0.0120921	0.00599233	-0.0133588	-0.00330663	-0.00969041	0.0053181	-0.00775119	0.0122735	-0.00281397	-0.00573759	0.00357069	-0.0103614	-0.00350425	0.00540407	0.00255106	0.00364991	-0.00443237	0.000200576	0.00392952	0.00471289	-0.00492297
WT8-D5	-0.240793	0.0717799	0.0389818	-0.000826954	-0.0173734	-0.0567436	0.0032794	0.0281914	0.0117258	-0.00708864	0.0160334	0.034338	0.00484398	0.0137674	-0.00398077	0.0186092	0.00818394	-0.00594474	0.0115595	-0.00472445	-0.00881614	0.00762088	-0.00110022	-0.0116131	0.00419251	0.021116	5.53678e-05	0.0114521	-0.00291409	0.00728805	-0.00675289	-0.00879419	-0.0036584	-0.0131005	0.013165	0.00846301	0.00557313	0.00234326	0.00559253	0.00895847	0.00220408	-0.00299377	-0.00564639	-0.00666718	-0.00311085	-0.00686197	0.010794	0.00297667	0.00588315
WT2-D7	-0.0101188	0.0263367	0.0750738	-0.0460842	0.0116878	0.0431267	0.00107464	-0.0182994	0.0225797	-0.0019147	0.0154159	-0.0248676	-0.0150528	0.00623113	-0.00376241	-0.016271	0.004039	-0.0150737	-0.00148726	0.00366706	-0.00564417	0.0137491	0.0034227	0.00779514	0.0244451	0.00207664	-0.00440066	-0.00965213	-0.00204061	0.00195974	0.005307	0.00405416	0.0162316	0.00812873	0.00590819	-0.00554434	-0.00313685	-0.0042929	-0.00315753	0.00483536	-0.00906705	-0.00224161	0.00259195	0.00109112	0.00381739	0.00895171	0.000485929	0.00824844	0.00297837
WT3-H0	0.024758	0.0274815	0.089701	0.0277196	0.0114624	0.0327408	0.000863742	0.00177794	-0.0112129	-0.0268121	-0.0187422	0.00495954	0.0100324	-0.0090564	-0.0169904	-0.0103438	-0.0111914	-0.0435128	-0.0148243	0.0056746	-0.0115558	0.00424532	-0.0120559	-0.00536539	-0.00932805	-0.0125308	0.00479457	-0.00362689	-0.00377238	-0.0121797	-0.0168576	0.0010254	0.00102627	0.00235049	0.00875991	-0.00370925	0.00637786	-0.00445832	-0.00415808	-0.00148236	0.00631638	0.00372347	-0.000152758	-0.00932284	0.00415415	0.00233162	0.000436815	0.00791199	0.00282735
WC3-D3	-0.0839226	0.0166164	0.0323264	-0.00213451	0.0142916	-0.00176989	0.00809511	0.0204332	-0.00990629	0.0152619	-0.012207	0.00413201	-0.00311196	-0.00562234	0.0169507	0.0162246	-0.019192	-0.0155604	0.00645564	0.00042921	0.000728605	0.0198815	0.0160344	0.00601274	0.000994984	0.0147967	0.00311331	-0.0196776	0.00169901	-0.00443091	0.00875779	0.00528034	3.38361e-05	-0.0108742	0.00116639	0.0116958	0.00260369	0.00103275	0.00602307	-0.00317436	0.00975969	-0.00596489	-0.0125157	0.00693608	0.00211741	-0.00184164	-0.000670811	-0.00814044	-0.000566494
WC5-D5	0.189953	0.134802	0.0589108	0.0927742	-0.0121407	0.0334529	0.0188783	-0.0309366	0.00458487	0.0201556	0.0364258	0.0172775	-0.0245712	0.0208054	0.0256625	-0.0110119	-0.000346249	0.00234038	-0.00763085	-0.00259839	0.0281718	0.00445494	0.00940825	0.00371758	-0.0136356	-0.0103298	-0.00149022	-0.00327539	-0.0159174	-0.0075965	-0.00164592	0.00199807	0.00502103	-0.00218965	0.00177978	0.00219289	0.0015482	-0.00358407	-0.00325189	0.00435293	-0.00604174	0.00832395	-0.00362498	0.00357925	-0.00198535	-0.00219633	-0.000124259	0.00357851	0.00501309
WT8-D3	-0.0882873	-0.030553	0.0602449	0.0399392	-0.00927584	-0.0222279	0.012721	0.0151956	0.0270189	-0.00988569	-0.0396577	-0.027528	0.0350076	-0.0159002	-0.0133856	0.0193676	-0.00909413	0.0134187	0.0221199	-0.00430191	0.0058441	0.00186661	0.0174412	-0.0151103	0.0103218	0.00444689	0.00514463	-0.00795322	-0.00355993	-0.00538322	0.00106527	0.00261758	0.000985359	-0.00690518	0.00136616	-0.000913613	0.00358822	0.000861476	-0.00388539	0.000621012	0.00137305	-0.00284173	-0.00542985	0.00984821	-0.00113669	-0.0111955	-0.00118957	0.00652021	-0.00162883
WC12-D7	-0.216092	-0.21248	0.0514533	0.0761496	-0.0789144	-0.0265024	-0.0483471	-0.0333776	-0.0338442	-0.0124369	-0.00927593	0.0120806	-0.0386719	-0.00578305	0.00688698	0.0194602	0.0107794	-0.000155899	-0.0375727	-0.0164592	-0.0254832	0.00507144	-0.0111889	-0.0118939	-0.0158595	0.00932447	0.035743	0.0123578	-0.0089183	0.00588974	-0.000571954	0.00620334	0.00293588	-0.0163808	0.00217257	-0.00240548	-0.00562764	-0.00150333	-0.00133095	-0.000388219	0.00361587	-0.00777502	0.00444466	0.000897976	0.000879612	0.00557428	-0.000526265	0.00450186	-0.000393172
WC8-D7	-0.159488	0.0150515	-0.0154643	0.0114864	-0.0144318	-0.0049776	-0.0136027	0.0048799	-0.0286015	0.00361502	-0.0227115	-0.0110944	-0.0254438	0.00389598	0.00487853	0.00914247	0.0094902	0.00159115	-0.00696233	-0.00629588	0.00786666	0.00239107	0.0108736	0.000821341	-0.00271449	-0.00173332	0.00756411	0.00539882	-0.00435687	-0.00299565	0.00558754	-0.00607465	-0.0159716	0.00340246	0.00927156	0.00482675	-0.00439606	-0.00207943	-0.00513723	-0.010181	0.00409505	0.0120366	-0.00468224	0.00312798	0.00532007	0.00368164	0.00124072	-0.00621823	-0.000465099
WC7-D5	-0.0088094	0.0275078	0.044786	-0.0328842	0.0280227	0.00332149	0.0430465	-0.00111695	-0.0155196	0.0280693	0.0275825	-0.00708212	0.00573481	-0.00773559	0.00270725	7.55619e-05	0.0216543	-0.0143805	0.0111418	-0.0144096	-0.00668537	0.00189044	-0.0027538	-0.0240927	-4.84138e-05	0.000991969	0.000764197	0.0126474	-0.00846905	0.00414494	0.0105622	0.000551424	-0.00650414	-0.000381676	-0.00151287	-0.0126696	0.00711838	0.00526845	-0.00140646	-0.00649231	0.00248329	0.00671338	0.000737255	0.00123994	-0.00064543	0.00351981	0.00432866	-0.000129874	-0.00105526
WT7-D7	-0.149183	0.00714996	-0.00482138	0.0240865	0.00107667	-0.0423194	-0.00829028	0.0102454	0.00814996	0.00253316	-0.0368007	-0.0187122	-0.0229889	0.0119246	-0.00538314	-0.00232471	0.0259564	-0.00778709	-0.00118043	0.0238392	0.00121385	0.00995335	-0.0133685	0.022128	0.00159009	-0.00636293	-0.00631425	0.00276944	-0.00127112	-0.00272111	-0.000294214	0.000510607	0.00392231	-0.00283631	0.00385617	-2.90947e-05	0.00224105	0.00961812	0.000666246	-0.0003822	-0.0060448	0.000379875	0.00632665	-0.000269093	0.0022267	0.000449048	0.0072801	-0.00709861	-0.00606267
TS1-D3	-0.122432	-0.00233975	-0.0530896	0.0522298	0.00924909	0.0715137	0.0127528	-0.00975594	-0.0241866	-0.00056569	-0.039288	0.00955614	0.0184598	-0.0197826	-0.0181254	-0.00172556	-0.00137206	-0.0321352	0.0184904	-0.0302708	-0.00443678	0.0132168	-0.0055701	0.0158555	0.0180114	0.00740318	0.00415209	-0.00799539	0.00794682	-0.011567	-0.00638338	0.00305879	0.00830394	-0.00185952	0.00136968	-0.00162303	-0.00341951	-0.00354975	0.00333326	-0.00538224	-0.0216408	-0.00299513	-0.012698	-0.00719803	-0.000823962	-0.00545491	0.000184028	-0.00200956	-0.0103199
WT10-D7	-0.23789	0.0726222	0.0524325	0.0149222	-0.0421895	0.00757675	-0.0165855	0.0612432	0.0332868	0.00741801	0.0438076	0.0492989	0.0256054	0.0340737	0.01622	0.0148815	0.00692589	-0.0214292	-0.0127841	-0.00543161	-0.000295575	0.0013017	0.00526766	-0.00285907	-0.0020366	0.000683079	-0.00110224	0.00638153	0.00203415	0.0036949	-0.00112711	-0.00889442	1.97876e-06	0.00294787	-0.00188297	0.00420301	0.00197898	-0.00016437	-0.00587151	-0.00444914	-0.00577664	-0.00129632	0.0052232	-0.001887	0.00998563	-0.00355638	0.00688152	0.00169029	0.00209768
TS6-D5	0.129559	0.0563324	-0.0955306	0.131328	0.00103461	0.0262902	-0.00834375	-0.0275737	-0.0318293	-0.0232727	-0.00571531	0.032968	0.0372608	-0.00632423	-0.00445729	-0.0155635	0.00755317	0.00121161	0.0169217	0.00812622	0.00350502	-0.00145898	-0.0082645	0.00498644	0.0159733	0.00765916	0.00232935	0.0206178	-0.00992497	0.00751415	0.00543224	0.00577272	-0.0123956	-0.00278999	0.000659503	0.00203057	-0.00734374	-0.00877494	0.0050237	-0.000275243	0.00627715	0.00363464	-0.00701392	0.00414534	-0.00930077	-0.00781012	0.000703349	0.00493308	-0.0028949
WC6-D5	-0.168988	0.0270211	0.00282139	0.00789274	-0.00931164	-0.0342239	-0.000791402	0.00908272	-0.0215302	-0.000582059	-0.0284353	0.00126609	-0.0292518	0.00896617	0.00307431	0.00467392	0.00693234	0.00103377	0.00226278	-0.0118787	0.0114107	-0.00549618	-0.00125923	0.0216317	-0.00293687	-0.0102018	0.00342416	0.00654796	0.0048292	0.00165227	-0.0105133	-0.00112853	0.00430228	-8.46522e-05	-0.000697477	-0.00821888	-0.00439401	0.00449362	0.00486659	-0.00228598	0.00393069	0.00234928	-0.000781641	0.00294518	0.00362926	0.000256766	0.00279187	-0.000752604	-0.00804536
TS2-D3	-0.0348581	-0.00660769	-0.0568307	0.0642437	0.00406977	0.0361334	0.0465593	0.0145661	0.0112251	0.00634423	0.000127803	-0.00187363	0.0186099	0.00952212	0.00554695	-0.0133224	0.00315734	0.0357381	-0.0116121	0.0123947	0.00257432	-0.0103936	-0.0101216	-0.00256669	0.00363296	0.00301758	0.0214559	-0.00357866	-0.00818339	-0.00282811	-0.0102526	0.00956094	0.00134406	-0.0035372	-0.00533792	-0.00683645	0.000247163	-0.00501614	-0.00289274	0.00727246	0.000289867	-0.00191903	-0.00317647	-0.00206926	0.00155051	-0.00582293	-0.00353965	-0.00232168	0.00499334
WC6-D7	0.0240624	-0.00683812	-0.0399472	-0.00596507	0.00562307	0.0350251	0.0141147	0.00353365	-0.00924246	0.00475483	0.0104921	-0.0142195	-0.0167034	0.00650104	-0.014491	0.00991826	-0.0104434	0.00394925	-0.00216376	-0.0156322	-0.00136938	-0.0129954	-0.0112698	-0.00407849	0.00716138	-0.000246372	-0.00113889	0.00385664	0.00846359	0.00161367	0.000422606	-0.000142219	0.000406492	0.00493947	0.0128682	0.0141852	-0.00508438	0.0016569	-0.00135979	0.00899924	9.50582e-05	0.00491338	-0.00651593	-0.00350363	0.00498653	0.00421654	-0.00297708	0.00113852	0.000445022
WT6-D3	-0.165753	0.0890412	0.103437	-0.0181472	0.0170013	0.0098902	0.0537313	-0.069254	0.0149084	-0.00157851	-0.0333396	-0.0113321	0.0039691	0.0560515	0.00514265	-0.00372651	-0.014558	0.0421147	-0.000701968	0.0220066	0.00200844	-0.0121921	0.0201951	0.00587613	-0.000922713	0.0183287	0.00609904	0.00719394	-0.00826783	0.00806417	-0.0171969	0.00586867	-0.000126688	-0.00487405	-0.00777314	-0.00438112	-0.00231858	-0.000472305	-0.00595646	0.00432949	0.00259639	0.00353637	-0.00311395	-0.00463602	0.00245822	-0.00286895	0.00158836	-0.000904032	0.00035474
TS8-D7	-0.0497711	-0.0237382	0.130817	0.00890658	-0.00697758	0.0371934	0.00786125	-0.0298013	0.00733914	-0.00412204	0.00312205	-0.0564815	0.0492557	0.0194876	0.0348912	-0.00622345	0.0182773	-0.00200296	0.00605054	-0.00899107	0.0198143	0.0196234	-0.0198531	0.00922966	-0.00197248	-0.00536169	0.0119875	-0.00964229	-0.0135736	0.00985308	0.00468093	-0.0119249	0.00415443	0.000417673	0.00424628	0.00293997	0.000521903	0.00160714	0.00126738	0.00430658	-0.00109983	-0.00214066	0.00309212	0.0055005	0.00339704	-0.00316138	-0.00114021	0.00145682	0.00473459
TS10-D3	0.158825	0.0671578	-0.0798293	0.144179	-0.00555964	0.011754	-0.0147193	-0.0161659	-0.0230928	0.00183063	-0.0297046	0.00585244	0.00443829	-0.00369925	0.0094233	0.00792852	0.00936359	0.0207178	-0.0227183	-0.00161519	-0.0198601	0.00664165	-0.0111628	-0.0129276	0.0105923	0.01888	-0.0162724	-0.00266374	0.0102802	-0.00601171	-0.00624972	0.00634917	0.0157483	0.00388286	-0.00105581	-0.00555772	-0.000457827	0.00835373	0.00288329	0.00541915	0.00539245	-0.00820819	-6.63884e-05	-0.00549288	0.00997637	0.00226385	0.00352404	-0.000656611	-1.52458e-05
WT1-D7	-0.299788	0.0326156	-0.106001	0.0430089	-0.0200439	0.0607305	-0.0193581	-0.0235001	-0.00993692	-0.0291154	0.0208003	-0.0077048	0.0431715	-0.0247849	-0.00606247	-0.0418565	-0.0151503	0.0127285	0.00946168	-0.00461924	-0.00237877	-0.0135032	0.00659842	-0.000379852	0.0066404	0.0185727	0.00171951	0.000777351	-0.0153213	0.000943466	0.0104321	-0.00490687	-0.0144331	-0.0177366	0.0104326	-0.0113314	0.0146217	-0.00382434	-0.00202772	0.00510844	-0.00527076	0.00378225	0.00260029	0.00157106	-0.00228027	0.00209588	0.000600664	-0.00659159	0.00379171
WT7-D3	0.276971	0.154877	0.0550306	0.207814	-0.0340954	-0.00834014	0.0443294	0.0728584	0.0643583	0.0154983	-0.0271309	-0.0215362	-0.0147056	-0.037624	-0.0218402	-0.0285039	0.028083	-0.00899178	-0.0117453	-0.0101141	-0.0223624	0.00336711	0.0075794	0.0109439	-0.00345458	0.00696744	0.0209909	0.00575	-0.00395545	0.0157048	0.00981454	-0.00178426	-0.012587	0.00781341	-0.00519354	0.00037414	-0.00458405	0.00484316	-0.00160327	0.00177564	0.000237209	-0.00203689	0.00168129	-0.00350275	0.000666809	-0.00250832	0.00101991	-0.000357498	-0.00186679
WT9-D3	0.105851	0.111879	0.0911583	0.0587446	-0.00421198	0.0380435	0.00265841	-0.0328675	-0.0186415	-0.00257037	-0.0350036	0.0159174	0.00736954	0.0138157	0.00305923	0.0189933	-0.00320256	0.0243516	-0.0245725	0.00353656	-0.0139588	-0.00246573	-0.00870431	-0.0110259	0.00305579	-0.0103417	-0.0319535	-0.00720553	0.0239027	-0.0103625	0.0172991	-0.0170321	0.0166163	-0.0113444	0.00939629	0.00180757	-0.00838973	0.00385982	0.00508272	-0.00666311	0.00191116	-0.00240417	0.0115071	-0.00180366	-0.00595695	0.00467555	-0.000660368	-0.0018076	-5.66481e-05
TS10-H0	-0.111637	-0.028619	-0.034146	0.0502961	0.0529949	-0.0267244	0.0102193	-0.0200992	0.0220153	-0.00157545	-0.0483399	0.00669806	0.01897	-0.00613685	-0.015699	-0.0106032	0.00130259	-0.0344089	-0.0156876	0.0159744	-0.0024025	-0.00494029	0.00567663	-0.0125094	0.00174552	0.00574394	-0.0120286	0.00330425	-0.00883285	-0.000625186	-0.0240563	0.00418018	0.00960527	0.0104067	0.000507181	-0.00499828	0.00199625	-0.00681063	0.00739678	0.0059482	0.00756465	0.00226996	0.00094287	-0.00259145	-0.00052872	-0.000521761	-0.00351095	0.00659575	0.00507729
TS5-H0	-0.212177	0.0295818	-0.0259658	0.0115885	-0.00772438	-0.0305554	-0.00712593	0.00703891	-0.033141	-0.012788	-0.0304801	-0.0159385	-0.0272309	0.0162784	-0.00799182	0.00267061	0.011779	0.00865143	-0.00732152	-0.010638	0.0065178	-0.017965	-0.00771066	-0.00430351	-0.00612928	0.013823	0.0164891	0.00729662	-0.00189252	-0.00889099	-0.00741875	-0.00119981	0.00305729	0.0101018	-0.00113494	0.000256961	-0.00810911	-0.00775745	-0.00485038	-0.00371367	0.000302033	-0.0142174	-0.00746399	-0.0121825	-0.0073327	0.00196032	-0.00775722	-0.00068672	0.00961046
WC1-D5	-0.175559	-0.130465	0.123538	0.0387991	-0.0435298	-0.0932317	0.00721407	-0.0114942	0.0150467	-0.00258135	-0.0102353	0.0341194	-0.00975386	-0.00164184	0.0180923	-0.0314496	0.0165463	0.00314021	-0.000219712	-0.00891516	0.00440448	-0.0063282	0.011015	0.0147075	0.00160508	0.0146204	-0.00920948	0.000269924	0.0156308	0.00645655	0.00188666	0.000170091	-0.00107474	0.00663862	-0.00235794	-0.0170718	-0.0060964	0.00104921	-0.00806558	0.0060319	-0.00430854	0.00699403	0.00263087	0.00434315	-0.00330157	0.00621005	-0.00292525	-0.000547349	-0.000656901
WT9-D5	-0.0158808	0.0235258	0.0379662	0.0242424	0.0482267	-0.0397215	0.0701444	0.0134007	0.0167851	-0.019674	-0.00545554	0.0190487	0.00125016	0.00462706	-0.00881474	-0.022502	0.00531901	-0.0039799	-0.014144	-0.00512964	-0.0057032	0.00243632	-0.0245785	0.00703377	0.00768739	0.00589864	-0.017127	-0.0053269	0.00199501	0.0147721	-0.0043827	-0.0010457	0.00181925	-0.00211735	-0.0119498	0.00430921	0.000111662	-0.0102778	-0.0081512	-0.00554862	-0.00592665	0.00144424	-0.00571537	0.00920063	0.00528744	0.00441758	-0.00347649	-0.0035451	-0.00442549
WT1-D5	-0.00922021	0.0407872	0.0561222	0.0208872	0.0204948	0.0220473	0.0427133	0.00810765	-0.0155258	-0.0250405	-0.000129767	0.0136743	0.00982756	-0.00773603	-0.0232998	-0.0156801	0.0127216	-0.000724076	-0.013013	-0.00298044	-0.00920888	0.0124525	0.00660412	-0.0293418	0.00861737	0.00149438	-0.00447909	0.0132877	-0.0226249	-0.000586048	0.0019785	0.00474534	0.00876631	0.0029062	0.00681585	0.000467723	-0.00208294	0.000146459	0.0071617	-0.000325883	-0.00334733	0.00369908	-0.00252754	0.000537378	-0.0018512	0.0017142	0.00383479	-0.00398228	-0.00021258
WT4-D5	-0.280137	0.0946861	0.0390167	-0.0075309	-0.0198882	-0.054297	0.0141214	0.0214426	0.0211744	-0.020751	0.0315115	0.0203407	0.0107784	0.00238559	-0.0159968	0.00238964	0.00525701	0.00654092	0.0244044	-0.00131158	-0.00878418	0.0112969	-0.0206422	-0.02071	0.00464255	0.0140015	0.00364885	-0.00592455	0.00376066	-0.0193016	-0.00297442	0.0120451	0.000350007	0.0020105	-0.00791693	0.0074118	-0.00524937	0.00575999	0.0077759	0.00354327	0.00901043	-0.00388761	-0.00158017	-0.00147824	9.89441e-05	0.00756598	-0.0149719	-0.00180805	0.000397528
WT6-D5	-0.166958	0.0562497	0.051495	0.0120684	-0.036588	0.0118331	0.0115355	0.00182151	0.00539114	-0.00372932	-0.00967603	0.0155852	-0.00186394	-0.0215852	0.00126081	0.00692651	0.0254808	0.0103631	-0.00556494	0.0033652	-0.00689888	-0.0148328	0.0171953	-0.0122317	0.00732789	-0.00682517	0.00547818	0.0117262	-0.0102333	0.00137033	0.00318391	0.00166319	-0.00165419	0.0103628	-0.00150981	-0.0112986	-0.0118169	0.0109805	0.00374453	0.00563995	-0.00381094	0.000241207	-0.00873423	0.00183694	-0.0078288	0.00275545	0.00159641	-0.00352671	0.00354569
TS2-H8	-0.276614	0.0570359	-0.0344663	0.000350182	-0.0159686	-0.044926	-0.00664878	0.0184407	-0.0284061	-0.0168265	0.00056975	-0.0333912	-0.00324406	-0.00148425	-0.0274135	-0.0188524	-0.0195957	0.0291079	0.00551271	0.010509	0.019349	-0.0022904	-0.0150517	-0.0138041	-0.0049505	0.00932988	-0.00723615	-0.00159218	-0.0108082	-0.013494	0.00152273	0.00112665	0.00559087	0.00185053	0.00500621	-0.00193125	0.00121772	0.00762144	-0.00168055	0.00450106	-0.000410089	-0.00689391	0.00845637	0.0122715	-0.00170296	0.00553202	0.00424617	0.00237108	-0.0107808
TS8-D3	-0.293969	0.0334184	-0.095431	0.0293255	-0.0225621	0.0363782	-0.0220921	-0.0283703	-0.0205792	-0.0287784	0.0117684	-0.0068208	0.0210372	-0.0247417	-0.00601262	0.0187685	-0.0177137	0.00952345	-0.0103233	-0.00650777	-0.0207995	-0.000773169	0.0136614	-0.00734202	0.000628086	-0.00281378	-0.00351167	0.000104239	-0.00940905	-0.00033276	-0.00161412	-0.00225191	0.00911822	0.0234266	-0.00344521	0.014674	-0.00788365	0.00953846	-0.00154626	0.00698664	0.00284678	-0.000336439	0.00576826	0.0035131	0.00349718	0.00436444	0.00311671	-0.000246255	-0.00619568
WT6-D7	-0.181461	-0.220186	0.0639434	0.0954412	-0.0732942	0.000891889	-0.0152487	0.00105393	-0.0294556	0.0236404	-0.0514748	0.00586067	-0.0338782	0.00115451	-0.0162801	0.0192117	0.046187	0.00217337	0.0100017	0.0456516	0.0148997	0.00648845	-0.00765037	-0.0148784	0.0253575	-0.0141251	-0.015522	-0.000666324	-0.00315236	-0.0125969	-0.00741746	-0.00524031	-0.00577241	-0.00310868	0.00105144	0.0150959	0.00593739	0.000495082	0.00827767	-0.00179917	-0.0012715	0.00586843	-0.00507216	-0.00173512	9.22465e-06	-0.0027535	0.00100048	-0.000839411	0.000126293
TS9-H8	-0.229172	0.0446312	-0.0126451	0.0145228	-0.0457183	0.0137989	-0.0243131	0.0301884	-0.0378367	-0.0114283	-0.00329265	-0.0216951	-0.000410112	-0.0130976	-0.0153142	-0.0089941	-0.0280636	0.0148316	-0.012442	-0.00857507	-0.00627261	-0.0109289	-0.0141064	0.00453058	0.00331318	-0.0052969	-0.0103656	-0.00468173	-0.0180242	0.00753631	-0.00826501	0.00804205	-0.00424038	-0.00679893	0.00448902	-0.00342094	-0.0088401	0.0100843	0.00138597	0.00677494	0.00486404	0.00308056	-0.0119952	-0.00558783	0.000495095	-0.000126201	0.00266156	0.00444248	0.000549562
WT1-D3	0.0502019	-0.00831184	0.0599766	0.0469446	0.0822441	0.0194095	-0.103061	0.0963716	-0.0339262	-0.0713197	-0.0477941	0.0155764	0.0271615	0.0349867	0.00238025	0.0261562	-0.00257133	-0.000654959	0.0293581	0.00101977	-0.0210801	0.00186556	-0.00794947	0.00500326	-0.00136918	0.00448026	-3.84744e-05	-0.00603156	-0.0116823	-0.00291487	0.0114615	0.00267803	0.00977638	-0.00140737	0.00710201	-0.00857826	0.002384	-0.00104802	-0.00289474	0.00240956	-0.00246995	-0.00122946	-0.000859064	0.00195779	-0.000485548	-0.00326803	-0.00120223	-0.0034197	0.00387529
WT7-H8	-0.205508	0.025324	-0.00497199	0.0317656	-0.0124959	0.0082219	-0.0364468	0.0790886	0.00245495	0.0156216	0.00131767	0.0293519	0.00526397	0.0618129	0.0115617	0.0116563	0.0159459	-0.0201223	-0.0257766	0.00894544	0.0218705	0.0237008	0.0176093	0.0127079	0.0143361	0.00399105	-0.00138822	0.0101289	-0.00353908	-0.000235262	0.00228337	0.00450003	0.00352904	0.00358593	0.000457749	-0.00918641	-0.0139438	-0.00264455	0.0038388	-0.00133943	-0.00258916	0.00307696	-0.00267107	0.0028924	-0.00861359	0.00405897	-0.00247908	0.00244374	-0.0018435
Biplot	0	0
Site constraints	0	0
[truncated: 128 more columns]

## Sheet: Sterile unweighted unifrac DM
	AC1-D3	AC1-D5	AC1-H8	AC10-D3	AC2-D3	AC2-D7	AC4-D3	AC5-D3	AC5-H8	AC6-D3	AC7-D7	AC7-H8	AC8-D3	AC8-D5	AC9-D3	AT2-D5	AT6-H8	AT9-D5	CS1-H0	CS10-H0	CS3-H0	CS5-H0	CS7-H0	AC1-D7	AC10-D5	AC10-D7	AC9-H8	AT5-D7	CS8-H0	TS3-H0	AC2-H8	AC3-H8	AC6-D7	AC8-D7	AT4-H8	AT8-D5	AT8-H8	CS6-H0	TS2-H0	TS8-H0	AC3-D3	AC3-D5	AC4-H8	AC5-D7	AT1-D3	AT3-H8	CS9-H0	AT4-D7	AT9-D3
AC1-D3	0	0.225409	0.221061	0.236836	0.214021	0.282375	0.243532	0.261043	0.226375	0.172279	0.229069	0.214567	0.256125	0.224763	0.257515	0.29916	0.340912	0.166582	0.29864	0.217998	0.313485	0.287132	0.254441	0.224557	0.276729	0.310476	0.220249	0.300875	0.238723	0.374384	0.236637	0.217289	0.201459	0.248419	0.338444	0.216063	0.213277	0.236891	0.31673	0.262894	0.213808	0.244323	0.330021	0.200677	0.220185	0.247345	0.248749	0.23546	0.253402
AC1-D5	0.225409	0	0.217547	0.191468	0.218637	0.300144	0.251878	0.279982	0.285535	0.185735	0.214902	0.242687	0.232158	0.225366	0.275725	0.331033	0.343172	0.235819	0.218255	0.201594	0.156849	0.175662	0.242683	0.269701	0.208845	0.303321	0.182359	0.221289	0.214932	0.339531	0.131975	0.260454	0.242454	0.236088	0.378135	0.273516	0.313007	0.293416	0.338784	0.275774	0.233573	0.292199	0.35031	0.242187	0.232372	0.244956	0.201115	0.24144	0.270145
AC1-H8	0.221061	0.217547	0	0.267107	0.172318	0.281773	0.283745	0.243044	0.274671	0.188151	0.19047	0.205608	0.275281	0.191043	0.280546	0.252708	0.308128	0.22882	0.266646	0.197095	0.254132	0.245594	0.253809	0.181226	0.24069	0.274545	0.240933	0.290186	0.165137	0.35176	0.235629	0.1819	0.203627	0.252106	0.379079	0.277542	0.242876	0.286489	0.349879	0.263809	0.162924	0.239183	0.320723	0.222676	0.237014	0.269261	0.261838	0.22123	0.172203
AC10-D3	0.236836	0.191468	0.267107	0	0.234785	0.307627	0.245231	0.259747	0.325027	0.201284	0.25291	0.172284	0.176401	0.226082	0.258654	0.327227	0.335655	0.285062	0.252847	0.239878	0.269981	0.177084	0.208504	0.23478	0.218953	0.256755	0.242562	0.217592	0.23678	0.335	0.139701	0.170431	0.228275	0.244195	0.304591	0.271001	0.317508	0.328501	0.277932	0.261884	0.217234	0.242008	0.311272	0.223807	0.234929	0.20618	0.205636	0.253777	0.268277
AC2-D3	0.214021	0.218637	0.172318	0.234785	0	0.231132	0.223917	0.176801	0.231091	0.150988	0.156461	0.171722	0.221415	0.215942	0.202134	0.193549	0.21389	0.216804	0.207035	0.170334	0.210999	0.237902	0.238549	0.173727	0.230313	0.249117	0.210035	0.263414	0.197531	0.304979	0.252297	0.224604	0.165419	0.210713	0.289747	0.272409	0.272192	0.28987	0.292245	0.192906	0.188667	0.223663	0.251387	0.180367	0.18681	0.217096	0.232314	0.158354	0.197604
AC2-D7	0.282375	0.300144	0.281773	0.307627	0.231132	0	0.206165	0.198623	0.254982	0.22391	0.251038	0.247317	0.272242	0.279861	0.205343	0.229118	0.21971	0.319469	0.276265	0.248945	0.245082	0.340113	0.242931	0.220803	0.316244	0.29256	0.244493	0.280983	0.300135	0.217361	0.316929	0.254193	0.234785	0.215556	0.238424	0.307879	0.338123	0.311453	0.327676	0.204933	0.256958	0.247207	0.320579	0.212721	0.241587	0.251987	0.339004	0.271877	0.260318
AC4-D3	0.243532	0.251878	0.283745	0.245231	0.223917	0.206165	0	0.233669	0.297739	0.220077	0.239295	0.217487	0.255693	0.283263	0.232863	0.239277	0.302371	0.30675	0.258586	0.256999	0.306214	0.322617	0.277854	0.269561	0.296334	0.311203	0.260946	0.307328	0.265735	0.315613	0.271789	0.255733	0.231635	0.273006	0.256403	0.306583	0.291294	0.340249	0.355709	0.245519	0.223592	0.274803	0.307115	0.200785	0.222791	0.254863	0.264679	0.235542	0.258062
AC5-D3	0.261043	0.279982	0.243044	0.259747	0.176801	0.198623	0.233669	0	0.266006	0.197693	0.20745	0.216528	0.242862	0.229354	0.232421	0.201154	0.230835	0.224818	0.226469	0.232102	0.282624	0.250085	0.220607	0.193875	0.254428	0.21586	0.250533	0.205844	0.194288	0.319673	0.271829	0.22266	0.163978	0.208855	0.296392	0.230103	0.251393	0.240149	0.24611	0.220036	0.214766	0.247254	0.27518	0.173514	0.182924	0.203621	0.251008	0.200258	0.253679
AC5-H8	0.226375	0.285535	0.274671	0.325027	0.231091	0.254982	0.297739	0.266006	0	0.193869	0.241879	0.262037	0.30965	0.306584	0.263444	0.304731	0.265573	0.227114	0.314331	0.25701	0.256636	0.332997	0.318299	0.26251	0.275905	0.320101	0.261414	0.323971	0.295962	0.350764	0.341344	0.294662	0.257328	0.220735	0.348861	0.282733	0.233318	0.275039	0.356466	0.286972	0.285373	0.279362	0.397253	0.261257	0.306233	0.27169	0.327733	0.260711	0.251034
AC6-D3	0.172279	0.185735	0.188151	0.201284	0.150988	0.22391	0.220077	0.197693	0.193869	0	0.166839	0.141377	0.245082	0.228515	0.219039	0.238867	0.253905	0.187675	0.236865	0.174782	0.241967	0.237765	0.23679	0.162065	0.260014	0.242383	0.196937	0.241683	0.192652	0.329251	0.229276	0.206541	0.152144	0.18723	0.310747	0.269359	0.23278	0.277041	0.294904	0.23214	0.160453	0.201028	0.312847	0.153604	0.195747	0.19866	0.223963	0.168326	0.204379
AC7-D7	0.229069	0.214902	0.19047	0.25291	0.156461	0.251038	0.239295	0.20745	0.241879	0.166839	0	0.211894	0.253264	0.229601	0.206554	0.233908	0.263185	0.24682	0.256123	0.137131	0.222227	0.243907	0.248935	0.203936	0.273157	0.247294	0.254912	0.269754	0.175244	0.301117	0.257135	0.220091	0.202327	0.156969	0.321119	0.263765	0.281294	0.288094	0.298082	0.239965	0.171762	0.225316	0.306972	0.20031	0.179121	0.254155	0.220518	0.204777	0.214126
AC7-H8	0.214567	0.242687	0.205608	0.172284	0.171722	0.247317	0.217487	0.216528	0.262037	0.141377	0.211894	0	0.243273	0.243759	0.224842	0.247015	0.279629	0.224246	0.249033	0.199496	0.270109	0.237152	0.21511	0.189002	0.257062	0.274484	0.243742	0.265503	0.182333	0.323168	0.222036	0.156887	0.177143	0.211539	0.323769	0.267951	0.255103	0.282329	0.283856	0.218588	0.191158	0.152679	0.320394	0.183404	0.200743	0.188789	0.234032	0.176833	0.227925
AC8-D3	0.256125	0.232158	0.275281	0.176401	0.221415	0.272242	0.255693	0.242862	0.30965	0.245082	0.253264	0.243273	0	0.23437	0.278932	0.29636	0.288703	0.311621	0.25583	0.268412	0.250395	0.222103	0.254528	0.21568	0.157017	0.310049	0.231897	0.247801	0.291	0.310885	0.203994	0.225481	0.253819	0.287586	0.292709	0.269612	0.308479	0.346731	0.242286	0.245832	0.235384	0.278687	0.305347	0.288509	0.237918	0.214778	0.253726	0.253274	0.217835
AC8-D5	0.224763	0.225366	0.191043	0.226082	0.215942	0.279861	0.283263	0.229354	0.306584	0.228515	0.229601	0.243759	0.23437	0	0.250998	0.265267	0.312622	0.280553	0.287158	0.219578	0.289273	0.236872	0.278027	0.190048	0.222385	0.251836	0.198376	0.281856	0.172812	0.321635	0.205225	0.175784	0.211536	0.255422	0.320302	0.283235	0.304887	0.322112	0.323499	0.279717	0.222295	0.278444	0.24414	0.235906	0.244221	0.284637	0.228368	0.241941	0.242979
AC9-D3	0.257515	0.275725	0.280546	0.258654	0.202134	0.205343	0.232863	0.232421	0.263444	0.219039	0.206554	0.224842	0.278932	0.250998	0	0.22754	0.237767	0.294178	0.282607	0.200355	0.246545	0.28581	0.264287	0.249572	0.298733	0.239434	0.287664	0.27037	0.242415	0.199402	0.284853	0.231528	0.192303	0.206211	0.23491	0.3019	0.314013	0.288968	0.318756	0.231438	0.228208	0.193798	0.300054	0.234141	0.203455	0.233426	0.266832	0.23027	0.251023
AT2-D5	0.29916	0.331033	0.252708	0.327227	0.193549	0.229118	0.239277	0.201154	0.304731	0.238867	0.233908	0.247015	0.29636	0.265267	0.22754	0	0.267327	0.275184	0.21128	0.270882	0.303365	0.313978	0.280616	0.247167	0.34112	0.300582	0.327667	0.3354	0.262922	0.277393	0.340166	0.259691	0.212384	0.303824	0.252974	0.294945	0.325002	0.325336	0.319633	0.278437	0.246672	0.294388	0.289655	0.233889	0.23856	0.246012	0.336593	0.279667	0.289113
AT6-H8	0.340912	0.343172	0.308128	0.335655	0.21389	0.21971	0.302371	0.230835	0.265573	0.253905	0.263185	0.279629	0.288703	0.312622	0.237767	0.267327	0	0.353032	0.293141	0.26518	0.280251	0.351187	0.345879	0.263054	0.296836	0.304323	0.30783	0.332908	0.319945	0.250891	0.358784	0.304972	0.285443	0.246998	0.269705	0.36405	0.350533	0.388293	0.330825	0.278127	0.290155	0.235095	0.301443	0.291954	0.299303	0.254009	0.33607	0.284822	0.252276
AT9-D5	0.166582	0.235819	0.22882	0.285062	0.216804	0.319469	0.30675	0.224818	0.227114	0.187675	0.24682	0.224246	0.311621	0.280553	0.294178	0.275184	0.353032	0	0.238902	0.257832	0.280195	0.210813	0.256643	0.247259	0.326231	0.28462	0.223489	0.263651	0.239359	0.365163	0.278751	0.249061	0.202836	0.265377	0.41183	0.215688	0.199997	0.169743	0.301937	0.257132	0.226919	0.260196	0.357662	0.21945	0.211735	0.266627	0.243192	0.264611	0.269487
CS1-H0	0.29864	0.218255	0.266646	0.252847	0.207035	0.276265	0.258586	0.226469	0.314331	0.236865	0.256123	0.249033	0.25583	0.287158	0.282607	0.21128	0.293141	0.238902	0	0.265615	0.236032	0.199103	0.235687	0.258035	0.297744	0.290969	0.265458	0.223359	0.262832	0.297034	0.212621	0.2501	0.209618	0.30015	0.305025	0.230684	0.29827	0.276757	0.249576	0.236459	0.247453	0.299941	0.298687	0.254968	0.20382	0.201383	0.282194	0.269437	0.300221
CS10-H0	0.217998	0.201594	0.197095	0.239878	0.170334	0.248945	0.256999	0.232102	0.25701	0.174782	0.137131	0.199496	0.268412	0.219578	0.200355	0.270882	0.26518	0.257832	0.265615	0	0.211829	0.231288	0.269392	0.217392	0.255708	0.272089	0.253359	0.278422	0.177781	0.304298	0.205811	0.213403	0.217137	0.15047	0.327718	0.273562	0.275997	0.312829	0.322721	0.234072	0.177014	0.22292	0.336419	0.199619	0.184126	0.250858	0.211663	0.190614	0.20698
CS3-H0	0.313485	0.156849	0.254132	0.269981	0.210999	0.245082	0.306214	0.282624	0.256636	0.241967	0.222227	0.270109	0.250395	0.289273	0.246545	0.303365	0.280251	0.280195	0.236032	0.211829	0	0.2307	0.236891	0.276878	0.233827	0.30665	0.209116	0.239646	0.291987	0.266903	0.214504	0.294279	0.289989	0.223479	0.353753	0.264166	0.363596	0.314573	0.321304	0.231591	0.270998	0.29374	0.375717	0.244615	0.246575	0.230342	0.303662	0.269591	0.262838
CS5-H0	0.287132	0.175662	0.245594	0.177084	0.237902	0.340113	0.322617	0.250085	0.332997	0.237765	0.243907	0.237152	0.222103	0.236872	0.28581	0.313978	0.351187	0.210813	0.199103	0.231288	0.2307	0	0.232283	0.251463	0.22128	0.243991	0.235943	0.185943	0.198685	0.311083	0.169397	0.20045	0.230698	0.253391	0.409342	0.236272	0.275633	0.266625	0.256508	0.262191	0.237837	0.265609	0.348103	0.280731	0.180897	0.224436	0.206966	0.218405	0.281002
CS7-H0	0.254441	0.242683	0.253809	0.208504	0.238549	0.242931	0.277854	0.220607	0.318299	0.23679	0.248935	0.21511	0.254528	0.278027	0.264287	0.280616	0.345879	0.256643	0.235687	0.269392	0.236891	0.232283	0	0.260618	0.258399	0.249729	0.229706	0.237363	0.221419	0.338274	0.241657	0.235328	0.220818	0.220857	0.365188	0.187149	0.304718	0.280315	0.257632	0.242654	0.246489	0.264463	0.358261	0.182583	0.252691	0.195469	0.292981	0.276262	0.284802
AC1-D7	0.224557	0.269701	0.181226	0.23478	0.173727	0.220803	0.269561	0.193875	0.26251	0.162065	0.203936	0.189002	0.21568	0.190048	0.249572	0.247167	0.263054	0.247259	0.258035	0.217392	0.276878	0.251463	0.260618	0	0.254739	0.250498	0.21466	0.19693	0.208593	0.295035	0.233009	0.165029	0.188733	0.229582	0.292929	0.264776	0.275428	0.278549	0.268743	0.219724	0.155011	0.210286	0.27613	0.189164	0.160548	0.214072	0.224764	0.187856	0.192696
AC10-D5	0.276729	0.208845	0.24069	0.218953	0.230313	0.316244	0.296334	0.254428	0.275905	0.260014	0.273157	0.257062	0.157017	0.222385	0.298733	0.34112	0.296836	0.326231	0.297744	0.255708	0.233827	0.22128	0.258399	0.254739	0	0.335204	0.223116	0.251453	0.262392	0.364869	0.202948	0.274761	0.273434	0.230934	0.352998	0.283096	0.281573	0.353824	0.307399	0.292424	0.248214	0.301038	0.351746	0.2758	0.302789	0.226588	0.24285	0.240999	0.214303
AC10-D7	0.310476	0.303321	0.274545	0.256755	0.249117	0.29256	0.311203	0.21586	0.320101	0.242383	0.247294	0.274484	0.310049	0.251836	0.239434	0.300582	0.304323	0.28462	0.290969	0.272089	0.30665	0.243991	0.249729	0.250498	0.335204	0	0.269714	0.254003	0.196515	0.27278	0.309421	0.245283	0.211241	0.214863	0.32313	0.270474	0.3398	0.285967	0.277539	0.241131	0.249722	0.269764	0.267263	0.216758	0.239539	0.256584	0.273349	0.250474	0.339868
AC9-H8	0.220249	0.182359	0.240933	0.242562	0.210035	0.244493	0.260946	0.250533	0.261414	0.196937	0.254912	0.243742	0.231897	0.198376	0.287664	0.327667	0.30783	0.223489	0.265458	0.253359	0.209116	0.235943	0.229706	0.21466	0.223116	0.269714	0	0.249588	0.234416	0.28426	0.220692	0.248784	0.260972	0.242475	0.342672	0.284587	0.30298	0.284212	0.339488	0.176087	0.223325	0.265697	0.30611	0.209943	0.203501	0.255165	0.226374	0.228198	0.233493
AT5-D7	0.300875	0.221289	0.290186	0.217592	0.263414	0.280983	0.307328	0.205844	0.323971	0.241683	0.269754	0.265503	0.247801	0.281856	0.27037	0.3354	0.332908	0.263651	0.223359	0.278422	0.239646	0.185943	0.237363	0.19693	0.251453	0.254003	0.249588	0	0.264831	0.302906	0.197142	0.260469	0.221999	0.267465	0.334869	0.252898	0.325902	0.233142	0.233406	0.242453	0.240636	0.25618	0.308382	0.208564	0.149356	0.205674	0.217907	0.237397	0.282028
CS8-H0	0.238723	0.214932	0.165137	0.23678	0.197531	0.300135	0.265735	0.194288	0.295962	0.192652	0.175244	0.182333	0.291	0.172812	0.242415	0.262922	0.319945	0.239359	0.262832	0.177781	0.291987	0.198685	0.221419	0.208593	0.262392	0.196515	0.234416	0.264831	0	0.351176	0.217773	0.181735	0.162941	0.201252	0.381022	0.252802	0.249862	0.272613	0.299104	0.268966	0.193366	0.230706	0.293076	0.187657	0.203095	0.246659	0.206537	0.157174	0.255634
TS3-H0	0.374384	0.339531	0.35176	0.335	0.304979	0.217361	0.315613	0.319673	0.350764	0.329251	0.301117	0.323168	0.310885	0.321635	0.199402	0.277393	0.250891	0.365163	0.297034	0.304298	0.266903	0.311083	0.338274	0.295035	0.364869	0.27278	0.28426	0.302906	0.351176	0	0.322136	0.283935	0.319794	0.285981	0.239116	0.362207	0.426989	0.342369	0.343811	0.243657	0.315863	0.279974	0.328643	0.320037	0.237882	0.301206	0.314638	0.319563	0.339627
AC2-H8	0.236637	0.131975	0.235629	0.139701	0.252297	0.316929	0.271789	0.271829	0.341344	0.229276	0.257135	0.222036	0.203994	0.205225	0.284853	0.340166	0.358784	0.278751	0.212621	0.205811	0.214504	0.169397	0.241657	0.233009	0.202948	0.309421	0.220692	0.197142	0.217773	0.322136	0	0.209535	0.260918	0.251474	0.369893	0.239977	0.304732	0.298903	0.306873	0.283589	0.205629	0.284553	0.365941	0.241882	0.193483	0.217131	0.187071	0.239279	0.265509
AC3-H8	0.217289	0.260454	0.1819	0.170431	0.224604	0.254193	0.255733	0.22266	0.294662	0.206541	0.220091	0.156887	0.225481	0.175784	0.231528	0.259691	0.304972	0.249061	0.2501	0.213403	0.294279	0.20045	0.235328	0.165029	0.274761	0.245283	0.248784	0.260469	0.181735	0.283935	0.209535	0	0.173077	0.235553	0.325382	0.272273	0.264702	0.265792	0.295837	0.219665	0.197415	0.204945	0.29898	0.215833	0.204948	0.244733	0.216885	0.237248	0.225447
AC6-D7	0.201459	0.242454	0.203627	0.228275	0.165419	0.234785	0.231635	0.163978	0.257328	0.152144	0.202327	0.177143	0.253819	0.211536	0.192303	0.212384	0.285443	0.202836	0.209618	0.217137	0.289989	0.230698	0.220818	0.188733	0.273434	0.211241	0.260972	0.221999	0.162941	0.319794	0.260918	0.173077	0	0.210604	0.295829	0.248181	0.236892	0.207671	0.241944	0.229517	0.187416	0.237219	0.267111	0.151634	0.174543	0.207901	0.228041	0.164924	0.238321
AC8-D7	0.248419	0.236088	0.252106	0.244195	0.210713	0.215556	0.273006	0.208855	0.220735	0.18723	0.156969	0.211539	0.287586	0.255422	0.206211	0.303824	0.246998	0.265377	0.30015	0.15047	0.223479	0.253391	0.220857	0.229582	0.230934	0.214863	0.242475	0.267465	0.201252	0.285981	0.251474	0.235553	0.210604	0	0.331683	0.257985	0.292774	0.311689	0.307014	0.235911	0.216569	0.2386	0.347642	0.170697	0.250345	0.247135	0.203359	0.217068	0.257803
AT4-H8	0.338444	0.378135	0.379079	0.304591	0.289747	0.238424	0.256403	0.296392	0.348861	0.310747	0.321119	0.323769	0.292709	0.320302	0.23491	0.252974	0.269705	0.41183	0.305025	0.327718	0.353753	0.409342	0.365188	0.292929	0.352998	0.32313	0.342672	0.334869	0.381022	0.239116	0.369893	0.325382	0.295829	0.331683	0	0.389666	0.428587	0.386738	0.337874	0.294264	0.324298	0.275783	0.27012	0.316109	0.294692	0.285986	0.332762	0.307353	0.344504
AT8-D5	0.216063	0.273516	0.277542	0.271001	0.272409	0.307879	0.306583	0.230103	0.282733	0.269359	0.263765	0.267951	0.269612	0.283235	0.3019	0.294945	0.36405	0.215688	0.230684	0.273562	0.264166	0.236272	0.187149	0.264776	0.283096	0.270474	0.284587	0.252898	0.252802	0.362207	0.239977	0.272273	0.248181	0.257985	0.389666	0	0.217828	0.244861	0.231936	0.27006	0.231469	0.317814	0.383925	0.211392	0.234485	0.20004	0.300461	0.253541	0.29134
AT8-H8	0.213277	0.313007	0.242876	0.317508	0.272192	0.338123	0.291294	0.251393	0.233318	0.23278	0.281294	0.255103	0.308479	0.304887	0.314013	0.325002	0.350533	0.199997	0.29827	0.275997	0.363596	0.275633	0.304718	0.275428	0.281573	0.3398	0.30298	0.325902	0.249862	0.426989	0.304732	0.264702	0.236892	0.292774	0.428587	0.217828	0	0.263706	0.335878	0.320322	0.252038	0.305175	0.403022	0.271557	0.280925	0.295437	0.307113	0.247496	0.211994
CS6-H0	0.236891	0.293416	0.286489	0.328501	0.28987	0.311453	0.340249	0.240149	0.275039	0.277041	0.288094	0.282329	0.346731	0.322112	0.288968	0.325336	0.388293	0.169743	0.276757	0.312829	0.314573	0.266625	0.280315	0.278549	0.353824	0.285967	0.284212	0.233142	0.272613	0.342369	0.298903	0.265792	0.207671	0.311689	0.386738	0.244861	0.263706	0	0.296257	0.254588	0.283289	0.301912	0.320322	0.249981	0.212247	0.283404	0.277245	0.291114	0.319807
TS2-H0	0.31673	0.338784	0.349879	0.277932	0.292245	0.327676	0.355709	0.24611	0.356466	0.294904	0.298082	0.283856	0.242286	0.323499	0.318756	0.319633	0.330825	0.301937	0.249576	0.322721	0.321304	0.256508	0.257632	0.268743	0.307399	0.277539	0.339488	0.233406	0.299104	0.343811	0.306873	0.295837	0.241944	0.307014	0.337874	0.231936	0.335878	0.296257	0	0.283626	0.29933	0.294245	0.299485	0.291828	0.26689	0.2253	0.29026	0.273028	0.343858
TS8-H0	0.262894	0.275774	0.263809	0.261884	0.192906	0.204933	0.245519	0.220036	0.286972	0.23214	0.239965	0.218588	0.245832	0.279717	0.231438	0.278437	0.278127	0.257132	0.236459	0.234072	0.231591	0.262191	0.242654	0.219724	0.292424	0.241131	0.176087	0.242453	0.268966	0.243657	0.283589	0.219665	0.229517	0.235911	0.294264	0.27006	0.320322	0.254588	0.283626	0	0.217216	0.246944	0.302257	0.196029	0.170633	0.226178	0.239952	0.226286	0.249064
AC3-D3	0.213808	0.233573	0.162924	0.217234	0.188667	0.256958	0.223592	0.214766	0.285373	0.160453	0.171762	0.191158	0.235384	0.222295	0.228208	0.246672	0.290155	0.226919	0.247453	0.177014	0.270998	0.237837	0.246489	0.155011	0.248214	0.249722	0.223325	0.240636	0.193366	0.315863	0.205629	0.197415	0.187416	0.216569	0.324298	0.231469	0.252038	0.283289	0.29933	0.217216	0	0.206256	0.324015	0.175621	0.143343	0.222987	0.239231	0.19479	0.14089
AC3-D5	0.244323	0.292199	0.239183	0.242008	0.223663	0.247207	0.274803	0.247254	0.279362	0.201028	0.225316	0.152679	0.278687	0.278444	0.193798	0.294388	0.235095	0.260196	0.299941	0.22292	0.29374	0.265609	0.264463	0.210286	0.301038	0.269764	0.265697	0.25618	0.230706	0.279974	0.284553	0.204945	0.237219	0.2386	0.275783	0.317814	0.305175	0.301912	0.294245	0.246944	0.206256	0	0.296203	0.257405	0.208783	0.215607	0.254439	0.202792	0.228113
AC4-H8	0.330021	0.35031	0.320723	0.311272	0.251387	0.320579	0.307115	0.27518	0.397253	0.312847	0.306972	0.320394	0.305347	0.24414	0.300054	0.289655	0.301443	0.357662	0.298687	0.336419	0.375717	0.348103	0.358261	0.27613	0.351746	0.267263	0.30611	0.308382	0.293076	0.328643	0.365941	0.29898	0.267111	0.347642	0.27012	0.383925	0.403022	0.320322	0.299485	0.302257	0.324015	0.296203	0	0.316067	0.289507	0.33274	0.297442	0.311329	0.365367
AC5-D7	0.200677	0.242187	0.222676	0.223807	0.180367	0.212721	0.200785	0.173514	0.261257	0.153604	0.20031	0.183404	0.288509	0.235906	0.234141	0.233889	0.291954	0.21945	0.254968	0.199619	0.244615	0.280731	0.182583	0.189164	0.2758	0.216758	0.209943	0.208564	0.187657	0.320037	0.241882	0.215833	0.151634	0.170697	0.316109	0.211392	0.271557	0.249981	0.291828	0.196029	0.175621	0.257405	0.316067	0	0.182188	0.201545	0.226857	0.206826	0.235249
AT1-D3	0.220185	0.232372	0.237014	0.234929	0.18681	0.241587	0.222791	0.182924	0.306233	0.195747	0.179121	0.200743	0.237918	0.244221	0.203455	0.23856	0.299303	0.211735	0.20382	0.184126	0.246575	0.180897	0.252691	0.160548	0.302789	0.239539	0.203501	0.149356	0.203095	0.237882	0.193483	0.204948	0.174543	0.250345	0.294692	0.234485	0.280925	0.212247	0.26689	0.170633	0.143343	0.208783	0.289507	0.182188	0	0.203071	0.18727	0.170174	0.230925
AT3-H8	0.247345	0.244956	0.269261	0.20618	0.217096	0.251987	0.254863	0.203621	0.27169	0.19866	0.254155	0.188789	0.214778	0.284637	0.233426	0.246012	0.254009	0.266627	0.201383	0.250858	0.230342	0.224436	0.195469	0.214072	0.226588	0.256584	0.255165	0.205674	0.246659	0.301206	0.217131	0.244733	0.207901	0.247135	0.285986	0.20004	0.295437	0.283404	0.2253	0.226178	0.222987	0.215607	0.33274	0.201545	0.203071	0	0.291845	0.202249	0.271995
CS9-H0	0.248749	0.201115	0.261838	0.205636	0.232314	0.339004	0.264679	0.251008	0.327733	0.223963	0.220518	0.234032	0.253726	0.228368	0.266832	0.336593	0.33607	0.243192	0.282194	0.211663	0.303662	0.206966	0.292981	0.224764	0.24285	0.273349	0.226374	0.217907	0.206537	0.314638	0.187071	0.216885	0.228041	0.203359	0.332762	0.300461	0.307113	0.277245	0.29026	0.239952	0.239231	0.254439	0.297442	0.226857	0.18727	0.291845	0	0.214158	0.266676
AT4-D7	0.23546	0.24144	0.22123	0.253777	0.158354	0.271877	0.235542	0.200258	0.260711	0.168326	0.204777	0.176833	0.253274	0.241941	0.23027	0.279667	0.284822	0.264611	0.269437	0.190614	0.269591	0.218405	0.276262	0.187856	0.240999	0.250474	0.228198	0.237397	0.157174	0.319563	0.239279	0.237248	0.164924	0.217068	0.307353	0.253541	0.247496	0.291114	0.273028	0.226286	0.19479	0.202792	0.311329	0.206826	0.170174	0.202249	0.214158	0	0.213584
AT9-D3	0.253402	0.270145	0.172203	0.268277	0.197604	0.260318	0.258062	0.253679	0.251034	0.204379	0.214126	0.227925	0.217835	0.242979	0.251023	0.289113	0.252276	0.269487	0.300221	0.20698	0.262838	0.281002	0.284802	0.192696	0.214303	0.339868	0.233493	0.282028	0.255634	0.339627	0.265509	0.225447	0.238321	0.257803	0.344504	0.29134	0.211994	0.319807	0.343858	0.249064	0.14089	0.228113	0.365367	0.235249	0.230925	0.271995	0.266676	0.213584	0
AT6-D5	0.37076	0.334428	0.348253	0.334457	0.292173	0.215232	0.301202	0.264411	0.341704	0.32259	0.315564	0.354776	0.250631	0.359846	0.3131	0.2096	0.278016	0.390384	0.265477	0.353644	0.28325	0.360608	0.284319	0.293525	0.324346	0.332156	0.339527	0.286499	0.373488	0.281435	0.342546	0.33465	0.322958	0.330443	0.257884	0.314427	0.407418	0.404093	0.324503	0.292824	0.329867	0.352723	0.364668	0.272679	0.302669	0.231617	0.39183	0.372396	0.334953
TS1-H0	0.319874	0.253408	0.343775	0.256316	0.292121	0.301713	0.274389	0.264062	0.357032	0.264482	0.287838	0.284553	0.306037	0.342733	0.328254	0.348834	0.354588	0.31543	0.235663	0.309699	0.255828	0.24269	0.234982	0.278949	0.323256	0.270788	0.263776	0.207713	0.307967	0.351083	0.25769	0.302239	0.301228	0.261837	0.38356	0.251323	0.373206	0.331578	0.276778	0.24354	0.284317	0.305556	0.370713	0.213497	0.239685	0.225787	0.249035	0.281675	0.337757
AC10-H8	0.25281	0.214015	0.257443	0.151442	0.229983	0.278872	0.29133	0.250893	0.285622	0.193528	0.227815	0.232572	0.219855	0.264633	0.219642	0.326705	0.306586	0.258142	0.252168	0.214555	0.243406	0.184447	0.213377	0.216137	0.219419	0.256551	0.267929	0.203538	0.267741	0.312699	0.204884	0.192968	0.215015	0.234995	0.351318	0.253851	0.283755	0.297777	0.260135	0.21796	0.190495	0.243456	0.358743	0.237117	0.230563	0.201442	0.242488	0.265072	0.223391
TS6-H0	0.279113	0.308498	0.308209	0.273691	0.24562	0.248726	0.225514	0.282945	0.290168	0.283329	0.281472	0.269824	0.258182	0.306149	0.253749	0.287624	0.271951	0.354713	0.306142	0.267952	0.324896	0.350681	0.33966	0.291168	0.316529	0.304088	0.298961	0.349163	0.313671	0.302795	0.313026	0.30224	0.293141	0.29428	0.245145	0.348579	0.341361	0.372805	0.318075	0.278781	0.270969	0.253656	0.291925	0.313943	0.282601	0.304035	0.338847	0.261389	0.281386
AC6-H8	0.222871	0.22048	0.156997	0.234018	0.190188	0.234092	0.217936	0.185913	0.271492	0.135719	0.171271	0.165632	0.256999	0.218785	0.240279	0.226309	0.302534	0.180884	0.229388	0.176762	0.269179	0.228309	0.22446	0.195516	0.300034	0.228501	0.249436	0.237967	0.185078	0.329178	0.254524	0.200621	0.148321	0.235265	0.338212	0.249793	0.235806	0.238528	0.274167	0.239441	0.172707	0.225505	0.299824	0.157534	0.191727	0.22795	0.227719	0.224727	0.204716
AT3-D7	0.33402	0.381227	0.381962	0.33855	0.333755	0.288067	0.335508	0.280461	0.350476	0.364703	0.356737	0.372463	0.304413	0.348683	0.352521	0.299951	0.36459	0.348287	0.249565	0.383866	0.325811	0.343866	0.297878	0.328436	0.365921	0.297251	0.357352	0.286239	0.35648	0.303503	0.350535	0.336659	0.29959	0.380111	0.289171	0.205797	0.361529	0.301982	0.237088	0.309039	0.326321	0.373642	0.308899	0.302266	0.284506	0.270796	0.396815	0.356039	0.396605
AC4-D7	0.234858	0.226242	0.143138	0.247121	0.162109	0.256485	0.283241	0.246124	0.247835	0.182906	0.187612	0.178576	0.247201	0.227452	0.262751	0.268167	0.279734	0.262001	0.280748	0.180271	0.253001	0.245881	0.295031	0.181317	0.228603	0.259643	0.252888	0.276926	0.182206	0.331564	0.259998	0.212636	0.206662	0.188904	0.329069	0.309413	0.275797	0.323292	0.329738	0.243245	0.198546	0.207749	0.302838	0.236689	0.235303	0.232392	0.257778	0.178922	0.220625
TS4-H0	0.227247	0.194309	0.166893	0.249679	0.194647	0.2566	0.280814	0.213187	0.284203	0.206158	0.207532	0.218619	0.265018	0.19338	0.246605	0.220454	0.300616	0.176565	0.210733	0.19856	0.222104	0.197618	0.21738	0.181092	0.281889	0.229142	0.201869	0.232541	0.187238	0.255791	0.197165	0.162243	0.19873	0.224042	0.352319	0.26207	0.284631	0.214313	0.320762	0.21912	0.191484	0.282225	0.314163	0.202631	0.175359	0.244282	0.226757	0.257626	0.239895
TS9-H0	0.194118	0.207781	0.212201	0.169516	0.165212	0.305064	0.240462	0.216597	0.27707	0.191129	0.19389	0.184158	0.21823	0.206329	0.230847	0.290511	0.301278	0.222799	0.280905	0.17659	0.284288	0.215817	0.251782	0.205224	0.213789	0.246737	0.213643	0.226705	0.205515	0.302181	0.210279	0.197495	0.195168	0.178351	0.309521	0.281742	0.281486	0.293403	0.294092	0.232154	0.214897	0.237238	0.271211	0.182143	0.205721	0.222521	0.142336	0.209033	0.234784
AC7-D5	0.255357	0.248094	0.217597	0.225197	0.175653	0.251973	0.253388	0.165339	0.255849	0.179665	0.228273	0.204017	0.250644	0.246744	0.257475	0.27564	0.280023	0.226905	0.27333	0.205696	0.25742	0.239232	0.250317	0.18512	0.226386	0.211417	0.231109	0.205	0.207075	0.322074	0.231839	0.194003	0.194736	0.199597	0.316083	0.278559	0.287279	0.253033	0.281471	0.22538	0.198533	0.224661	0.309396	0.149516	0.207363	0.234956	0.192424	0.181422	0.240471
AC9-D7	0.246929	0.249566	0.197039	0.271678	0.176233	0.250853	0.244474	0.171558	0.292372	0.18329	0.157407	0.207125	0.271169	0.210876	0.22083	0.204543	0.30004	0.253857	0.209183	0.174735	0.287416	0.266546	0.229241	0.22382	0.285891	0.22026	0.276832	0.262457	0.150113	0.309433	0.243512	0.225762	0.160206	0.20815	0.295268	0.24758	0.27562	0.268523	0.292651	0.256153	0.198795	0.247628	0.279248	0.211784	0.178721	0.250596	0.222018	0.196189	0.269982
AC4-D5	0.209524	0.226121	0.253525	0.213559	0.203212	0.279804	0.221899	0.23114	0.304078	0.211235	0.259602	0.186617	0.244652	0.276161	0.233742	0.300717	0.281558	0.219001	0.261328	0.215589	0.268625	0.248293	0.277666	0.260864	0.297504	0.293877	0.227196	0.268314	0.258062	0.298188	0.224929	0.230062	0.2401	0.265293	0.294366	0.292619	0.309994	0.317032	0.327608	0.189911	0.224289	0.213859	0.315235	0.24043	0.186726	0.241608	0.216918	0.220498	0.262033
AT3-D3	0.323995	0.211541	0.320644	0.26019	0.285976	0.270526	0.308141	0.290457	0.334342	0.264442	0.265001	0.297078	0.283235	0.325607	0.227736	0.333996	0.318879	0.324688	0.2098	0.25422	0.228061	0.227163	0.276218	0.275629	0.316276	0.29985	0.307398	0.205553	0.282068	0.27542	0.230227	0.285987	0.258189	0.268113	0.285355	0.305745	0.387205	0.307783	0.26059	0.232506	0.257339	0.238086	0.344878	0.29139	0.199655	0.223916	0.252538	0.266648	0.336624
AT2-D7	0.233632	0.2282	0.248246	0.219253	0.209454	0.241032	0.240299	0.18447	0.290873	0.200881	0.223918	0.206648	0.249738	0.262947	0.210162	0.282911	0.276208	0.207562	0.235329	0.211696	0.258598	0.191351	0.272642	0.208638	0.290796	0.258907	0.212534	0.181989	0.246967	0.260674	0.228805	0.204045	0.185661	0.195959	0.323522	0.28346	0.298219	0.241723	0.292342	0.197516	0.208008	0.226686	0.303796	0.192162	0.133176	0.251356	0.185999	0.21669	0.248477
AT8-D3	0.348089	0.302624	0.287533	0.305024	0.33543	0.382085	0.409625	0.324837	0.376802	0.292651	0.309836	0.341355	0.296129	0.30679	0.334406	0.36955	0.375867	0.361325	0.303788	0.320389	0.347251	0.25287	0.319314	0.310052	0.276058	0.346999	0.377299	0.279777	0.30377	0.433917	0.278684	0.301388	0.284633	0.350279	0.431854	0.327217	0.267136	0.376462	0.328106	0.36374	0.296515	0.317564	0.389099	0.361623	0.33405	0.264507	0.359516	0.306901	0.288202
AC6-D5	0.211853	0.177334	0.214762	0.174905	0.200346	0.253427	0.225861	0.205527	0.232164	0.174295	0.177409	0.207349	0.212519	0.207377	0.220016	0.30622	0.262102	0.237896	0.300804	0.187121	0.23651	0.243773	0.266861	0.211721	0.212342	0.251106	0.209053	0.269105	0.212987	0.316088	0.201628	0.196923	0.202548	0.164737	0.295836	0.310479	0.304616	0.288069	0.342356	0.273333	0.170754	0.212144	0.31093	0.203492	0.229021	0.24285	0.192682	0.217094	0.218762
TS7-H0	0.262896	0.222415	0.250738	0.221758	0.194016	0.257003	0.254143	0.232202	0.255868	0.215658	0.213939	0.219064	0.24387	0.284112	0.227434	0.225618	0.282539	0.284102	0.214235	0.206605	0.216365	0.226936	0.237181	0.234604	0.252301	0.271307	0.306526	0.221462	0.249127	0.308219	0.212053	0.270758	0.238614	0.239939	0.314907	0.232436	0.314632	0.334994	0.284179	0.280356	0.209845	0.243011	0.333248	0.225166	0.208542	0.197862	0.287549	0.229628	0.26877
AC8-H8	0.315138	0.3245	0.290957	0.337944	0.239737	0.229048	0.292584	0.29371	0.261904	0.247035	0.257242	0.292137	0.283535	0.312628	0.249582	0.265266	0.242192	0.35126	0.288734	0.233474	0.28697	0.319971	0.376629	0.265609	0.307268	0.355016	0.304127	0.323307	0.334844	0.304547	0.337174	0.272982	0.285037	0.273118	0.281808	0.395375	0.298355	0.371242	0.350549	0.272856	0.283249	0.24104	0.316216	0.33525	0.286663	0.303794	0.324874	0.268756	0.23427
AT10-D7	0.312137	0.280733	0.279384	0.261008	0.30984	0.3251	0.346782	0.322637	0.338449	0.266614	0.29495	0.275674	0.30676	0.322585	0.292041	0.371999	0.357556	0.359112	0.320426	0.269232	0.304245	0.296393	0.26742	0.256237	0.320429	0.33026	0.357778	0.212265	0.299982	0.389842	0.278001	0.291523	0.289954	0.28513	0.386309	0.334985	0.380529	0.384396	0.308453	0.339	0.282481	0.27355	0.359949	0.279761	0.293643	0.265795	0.320136	0.307184	0.321877
AT1-D7	0.278575	0.308146	0.271986	0.275071	0.239267	0.246872	0.2571	0.256027	0.295174	0.215365	0.265955	0.270204	0.292527	0.273366	0.213943	0.247832	0.261911	0.319309	0.284295	0.236096	0.288387	0.300845	0.31387	0.217869	0.33934	0.232763	0.286143	0.283935	0.299706	0.256053	0.298612	0.241757	0.230564	0.275881	0.249024	0.32901	0.370227	0.333615	0.319047	0.265456	0.211117	0.227149	0.324191	0.237111	0.218477	0.227077	0.312986	0.249313	0.27263
CS4-H0	0.312758	0.288451	0.308587	0.261904	0.274007	0.295832	0.290102	0.259866	0.365627	0.267371	0.281873	0.253929	0.318661	0.31925	0.235519	0.338601	0.348912	0.292536	0.268944	0.252791	0.325871	0.261796	0.334472	0.231007	0.358447	0.291637	0.30207	0.210053	0.271427	0.267722	0.245869	0.236369	0.229233	0.277436	0.321156	0.33174	0.350809	0.236866	0.314607	0.239636	0.230254	0.259861	0.300317	0.257326	0.16213	0.288074	0.241433	0.257049	0.320113
AT4-D5	0.199004	0.283981	0.252142	0.28415	0.210859	0.250033	0.243014	0.273491	0.249936	0.239668	0.236172	0.212003	0.298399	0.287883	0.232648	0.283186	0.33722	0.246223	0.265897	0.199292	0.315122	0.301484	0.28982	0.245415	0.310782	0.312682	0.306086	0.322731	0.243465	0.339752	0.267967	0.234339	0.230967	0.242996	0.320304	0.243999	0.228817	0.267576	0.30279	0.24382	0.20367	0.277165	0.357722	0.245611	0.215865	0.266409	0.285915	0.243184	0.282141
AT10-D3	0.419283	0.503277	0.455579	0.471871	0.394442	0.39264	0.387229	0.363498	0.431247	0.431379	0.421336	0.450794	0.452203	0.425746	0.398611	0.306165	0.394045	0.420132	0.381815	0.447862	0.48564	0.486916	0.472255	0.403752	0.526399	0.389285	0.493602	0.453193	0.439898	0.390369	0.484088	0.420879	0.381301	0.474221	0.348545	0.416001	0.467154	0.36436	0.406568	0.434652	0.422913	0.433993	0.327247	0.426018	0.376411	0.419012	0.468899	0.457853	0.483766
AT7-H8	0.503312	0.404166	0.449323	0.444194	0.443083	0.359112	0.445555	0.467679	0.488075	0.451657	0.449575	0.462122	0.394952	0.460301	0.43013	0.425268	0.417659	0.516596	0.382691	0.465662	0.370432	0.439311	0.431021	0.422018	0.407149	0.490064	0.420592	0.396634	0.510615	0.369137	0.415949	0.452352	0.480957	0.471707	0.378491	0.465386	0.500037	0.479891	0.451954	0.381666	0.456902	0.439774	0.422716	0.456601	0.439923	0.387359	0.462197	0.466257	0.426527
AC3-D7	0.244888	0.249313	0.207235	0.26568	0.168604	0.190388	0.214695	0.183716	0.19341	0.167865	0.203357	0.183531	0.26361	0.236002	0.197895	0.240016	0.196565	0.265585	0.251982	0.191782	0.21044	0.296116	0.257126	0.175405	0.236321	0.234045	0.238339	0.242975	0.213389	0.272924	0.260377	0.21846	0.197111	0.177133	0.251999	0.282452	0.301748	0.273591	0.29924	0.226149	0.194419	0.212091	0.304249	0.161828	0.223198	0.206818	0.254006	0.215155	0.210205
AT5-H8	0.337234	0.377676	0.361803	0.333809	0.301117	0.352589	0.38453	0.297701	0.333092	0.340498	0.354055	0.363824	0.284541	0.332155	0.324861	0.266188	0.347911	0.331234	0.272668	0.383673	0.358639	0.324937	0.346816	0.310162	0.362566	0.330176	0.414461	0.295816	0.36029	0.340164	0.359418	0.330572	0.302309	0.396207	0.285907	0.265423	0.362327	0.332699	0.238243	0.373167	0.361287	0.346694	0.324931	0.370229	0.323851	0.27075	0.389471	0.366926	0.38897
AT9-H8	0.312735	0.409259	0.340716	0.398639	0.291088	0.278506	0.342496	0.258582	0.324708	0.337032	0.316909	0.355921	0.356967	0.335242	0.327711	0.2484	0.328389	0.304945	0.296582	0.348324	0.353578	0.39546	0.341555	0.289294	0.408031	0.263275	0.361306	0.329713	0.334852	0.292289	0.405544	0.314372	0.270232	0.324481	0.262858	0.262957	0.360278	0.283611	0.293908	0.282469	0.319307	0.346431	0.278232	0.293461	0.281056	0.328215	0.363462	0.334205	0.384953
AT5-D5	0.370934	0.379305	0.350639	0.344329	0.261732	0.249298	0.315295	0.265137	0.309024	0.28176	0.297803	0.322209	0.306095	0.338907	0.251595	0.224262	0.254755	0.360602	0.307584	0.311747	0.325028	0.365174	0.348886	0.246331	0.355476	0.274681	0.322444	0.275825	0.315524	0.236074	0.386792	0.318594	0.287829	0.312598	0.177107	0.397153	0.425145	0.35113	0.315703	0.27328	0.308416	0.271881	0.253832	0.284578	0.269323	0.247921	0.333053	0.281613	0.345065
AC2-D5	0.224344	0.249781	0.234295	0.212887	0.200493	0.271063	0.29749	0.245808	0.277112	0.184033	0.208238	0.223408	0.27994	0.213357	0.181746	0.301952	0.292941	0.261792	0.284163	0.181649	0.275959	0.262468	0.280467	0.16314	0.296811	0.216719	0.26924	0.21144	0.204563	0.273	0.230779	0.18736	0.172527	0.192262	0.28792	0.299737	0.320348	0.273701	0.259664	0.253594	0.192535	0.213756	0.268485	0.182195	0.205749	0.23902	0.202934	0.20794	0.262276
AT8-D7	0.507574	0.423546	0.486707	0.460621	0.432155	0.406374	0.416154	0.462383	0.475819	0.451572	0.464418	0.492973	0.44642	0.505529	0.421975	0.393817	0.456318	0.494479	0.356908	0.454516	0.352601	0.446806	0.439243	0.444016	0.478755	0.424196	0.448297	0.352019	0.492764	0.351129	0.438556	0.495825	0.452212	0.467404	0.350422	0.480316	0.581482	0.498511	0.426205	0.418862	0.464528	0.470282	0.463422	0.405175	0.404487	0.393115	0.468949	0.456066	0.50583
AT7-D7	0.269573	0.282855	0.274716	0.228076	0.299671	0.328968	0.320266	0.35692	0.361379	0.272243	0.294331	0.29726	0.285925	0.204301	0.262991	0.3796	0.363219	0.353198	0.364798	0.273004	0.367678	0.296794	0.352043	0.236414	0.279718	0.31204	0.243641	0.304626	0.27425	0.331287	0.254747	0.207146	0.2818	0.30115	0.330532	0.379018	0.332259	0.388755	0.376907	0.291477	0.224934	0.260581	0.299609	0.311514	0.274602	0.333264	0.252281	0.287658	0.252369
AT2-H8	0.367278	0.308586	0.327188	0.313283	0.313047	0.338599	0.399639	0.319919	0.401871	0.347384	0.366481	0.361943	0.304817	0.312774	0.363503	0.378038	0.372608	0.348924	0.260869	0.355886	0.278485	0.262852	0.259059	0.310858	0.316946	0.268051	0.264063	0.212028	0.32043	0.33729	0.289327	0.338073	0.305825	0.336207	0.37326	0.298149	0.402126	0.344797	0.281788	0.275736	0.316443	0.328977	0.301137	0.304798	0.283515	0.271027	0.345236	0.321253	0.348017
AT6-D3	0.347041	0.367336	0.388534	0.323011	0.363143	0.401938	0.391828	0.321611	0.371676	0.356706	0.357518	0.357313	0.349852	0.36894	0.361062	0.361161	0.424194	0.326233	0.308752	0.364817	0.372044	0.322811	0.337382	0.307457	0.398467	0.309871	0.420016	0.254141	0.339747	0.407818	0.343485	0.328122	0.313639	0.40161	0.403416	0.286131	0.366252	0.31997	0.238969	0.372646	0.353323	0.357679	0.345865	0.339919	0.305457	0.293296	0.363095	0.356367	0.428268
AT10-D5	0.405515	0.425851	0.363102	0.407591	0.325815	0.298661	0.351158	0.29817	0.415025	0.345179	0.347204	0.378297	0.375329	0.336477	0.31254	0.202957	0.334122	0.410293	0.312744	0.38392	0.421547	0.397554	0.392019	0.295014	0.436675	0.299436	0.406511	0.344877	0.342124	0.306769	0.42633	0.34952	0.302497	0.390445	0.232599	0.425272	0.454433	0.412971	0.34281	0.368236	0.351667	0.343937	0.2666	0.351866	0.317527	0.34918	0.390082	0.364591	0.410161
AT7-D5	0.354182	0.351077	0.267128	0.353747	0.358055	0.386624	0.358045	0.327456	0.378355	0.304529	0.345747	0.338485	0.406213	0.307261	0.388652	0.427205	0.422815	0.35405	0.404749	0.319385	0.377887	0.338101	0.35511	0.315108	0.353918	0.290155	0.334067	0.297329	0.276206	0.444273	0.355989	0.313795	0.299602	0.331584	0.466073	0.365413	0.321973	0.374989	0.3885	0.351777	0.308956	0.347375	0.398798	0.266411	0.340542	0.372578	0.327645	0.30116	0.30816
AT4-D3	0.346057	0.38651	0.30908	0.343652	0.279606	0.331629	0.367238	0.28508	0.379296	0.294649	0.320465	0.352909	0.356852	0.298777	0.316614	0.279696	0.380092	0.350899	0.31514	0.342872	0.393832	0.365777	0.363622	0.284214	0.406916	0.273371	0.368416	0.303111	0.303135	0.369512	0.373556	0.307916	0.255719	0.364464	0.33458	0.3959	0.405736	0.391808	0.344777	0.34266	0.295562	0.334789	0.282902	0.301889	0.280748	0.342773	0.358208	0.329082	0.357204
TS10-H0	0.316889	0.249767	0.302707	0.227153	0.290995	0.256948	0.319154	0.278542	0.329505	0.257244	0.270177	0.294994	0.275076	0.269278	0.281429	0.344711	0.339729	0.345064	0.273161	0.265002	0.240435	0.258227	0.249712	0.240559	0.301918	0.210201	0.28754	0.18284	0.27219	0.300953	0.273253	0.241254	0.252355	0.238271	0.343717	0.293521	0.407408	0.328068	0.261034	0.259433	0.286419	0.304479	0.2997	0.232724	0.261243	0.239177	0.286801	0.303501	0.344735
TS5-H0	0.366113	0.317285	0.342541	0.296539	0.304408	0.31411	0.371959	0.280748	0.354483	0.299486	0.303645	0.333955	0.262041	0.314038	0.314839	0.366353	0.342536	0.378223	0.294278	0.316062	0.274686	0.306948	0.327268	0.238422	0.304532	0.30875	0.340584	0.179005	0.336845	0.331473	0.308175	0.304936	0.298545	0.318976	0.313348	0.307758	0.417381	0.37262	0.254795	0.324653	0.297718	0.302068	0.313943	0.310476	0.270734	0.252396	0.319857	0.277043	0.337164
AT6-D7	0.339503	0.333886	0.326508	0.306698	0.240826	0.278042	0.272598	0.235496	0.337462	0.253906	0.244318	0.28664	0.296995	0.28424	0.254561	0.276273	0.285569	0.35117	0.290563	0.272512	0.335718	0.338772	0.34926	0.231374	0.353546	0.240678	0.342967	0.263754	0.305642	0.298145	0.320233	0.281085	0.244577	0.282059	0.250389	0.36952	0.386416	0.354972	0.281726	0.275927	0.259931	0.28799	0.286848	0.248468	0.244316	0.256794	0.29381	0.283631	0.329527
AT1-D5	0.345642	0.304752	0.284603	0.303786	0.289183	0.291321	0.336612	0.265829	0.358443	0.286171	0.283382	0.311208	0.261678	0.272546	0.326539	0.259932	0.349194	0.34281	0.232605	0.328192	0.313121	0.277279	0.264371	0.23325	0.315859	0.283615	0.350159	0.251054	0.284949	0.35187	0.293923	0.288165	0.274539	0.323659	0.35756	0.306155	0.375165	0.37841	0.288042	0.350078	0.284479	0.324694	0.309653	0.296867	0.291583	0.257319	0.360037	0.319291	0.331786
AT2-D3	0.513481	0.522484	0.473783	0.455087	0.393929	0.436641	0.429069	0.37817	0.514276	0.447282	0.442136	0.447834	0.450197	0.441994	0.408272	0.342325	0.395335	0.492892	0.419333	0.485864	0.505119	0.470243	0.490295	0.405828	0.513735	0.394528	0.504306	0.420556	0.464154	0.402649	0.50744	0.426538	0.396144	0.469771	0.355477	0.525647	0.554642	0.468418	0.410595	0.46063	0.453809	0.435379	0.28717	0.45012	0.413802	0.435459	0.454268	0.455519	0.492866
AT9-D7	0.424376	0.45245	0.406338	0.403802	0.351571	0.311849	0.392361	0.36255	0.380541	0.353531	0.388471	0.33633	0.363149	0.394316	0.318945	0.341421	0.286202	0.4579	0.390172	0.370963	0.386686	0.424699	0.427446	0.316618	0.392835	0.372775	0.401426	0.353192	0.413407	0.316359	0.423319	0.369847	0.364113	0.361864	0.243543	0.458285	0.457247	0.443745	0.353008	0.366189	0.376629	0.30601	0.330287	0.374498	0.359112	0.338524	0.39861	0.330142	0.363168
AT1-H8	0.46141	0.431093	0.418093	0.454953	0.384484	0.354246	0.448881	0.375862	0.456265	0.408918	0.38279	0.419824	0.417176	0.389476	0.357094	0.335695	0.418473	0.42127	0.348513	0.422335	0.369334	0.385847	0.398855	0.354734	0.46713	0.344662	0.365986	0.344403	0.409209	0.281358	0.413099	0.373786	0.367577	0.399461	0.346654	0.439177	0.493424	0.391308	0.378021	0.352099	0.410645	0.408821	0.36531	0.383703	0.322966	0.392336	0.39453	0.409469	0.45125
AT7-D3	0.445677	0.470733	0.406733	0.477519	0.396539	0.324998	0.417595	0.413326	0.442676	0.404582	0.411914	0.432516	0.402428	0.424315	0.380943	0.365011	0.363667	0.504045	0.42521	0.423534	0.417084	0.475874	0.467298	0.363356	0.423627	0.411387	0.412961	0.411578	0.44932	0.338194	0.473684	0.423586	0.409824	0.424632	0.299888	0.487495	0.444323	0.490538	0.429963	0.390339	0.420799	0.375434	0.384273	0.412873	0.409713	0.388357	0.46056	0.39226	0.387028
[truncated: 44 more columns]

## Sheet: Sterile unweighted unifrac PC
Eigvals	93
0.971788	0.484427	0.43092	0.335665	0.287841	0.233547	0.206398	0.191027	0.164843	0.146955	0.138662	0.116383	0.112692	0.0954567	0.0909334	0.0834116	0.0791011	0.0723175	0.0646705	0.0611969	0.0591222	0.0525394	0.0473669	0.0460587	0.0427485	0.0414534	0.0365876	0.0360536	0.0346457	0.0292809	0.0277792	0.0255358	0.0232506	0.0214169	0.0193019	0.0187393	0.0155648	0.0139214	0.0132422	0.0116413	0.0102012	0.00971065	0.00721131	0.00608396	0.00551938	0.00387453	0.00236802	0.000950477	0.000327803	0
Proportion explained	93
0.19317	0.0962935	0.0856575	0.0667228	0.0572165	0.046424	0.0410274	0.0379721	0.0327673	0.0292114	0.0275629	0.0231343	0.0224007	0.0189747	0.0180756	0.0165804	0.0157236	0.0143751	0.0128551	0.0121646	0.0117522	0.0104437	0.00941552	0.00915546	0.00849747	0.00824003	0.00727282	0.00716667	0.0068868	0.00582041	0.00552191	0.00507597	0.00462171	0.00425721	0.0038368	0.00372496	0.00309394	0.00276727	0.00263226	0.00231404	0.00202779	0.00193027	0.00143345	0.00120936	0.00109713	0.000770172	0.000470711	0.000188934	6.51601e-05	0
Species	0	0
Site	93	93
AC1-D3	-0.121529	0.0654668	-0.0389183	0.0234873	-0.0363841	0.00285817	-0.0175196	0.0420039	-0.00282022	0.0318174	0.0786731	-0.0550382	0.0132207	-0.0278739	0.0133926	-0.0180972	0.0487023	-0.0167442	0.0190484	-0.0075935	0.0144056	-0.0439433	0.0192222	-0.0280026	-0.0300829	0.0379801	-0.00858774	-0.0171312	-0.00200034	0.025743	-0.023325	-0.00478475	-0.0128872	0.00641746	0.00641401	0.0147407	-0.0205021	-0.00852224	-0.0174768	0.00919783	0.004947	0.00313982	0.0110416	-0.00159754	-0.00874811	-0.00124358	-0.00169305	-0.00323228	0.000531788
AC1-D5	-0.124988	-0.090757	0.011641	0.0467899	0.0377568	-0.000352631	-0.0221635	-0.0709188	-0.0200925	0.0427819	0.0134316	-0.050192	0.0432799	0.0432178	0.0373496	-0.0175797	0.0155037	-0.0222728	-0.0209578	0.0155257	0.0212145	0.00382722	0.0200611	-0.000281127	0.0135252	0.00474419	-0.00200141	-0.0123089	-0.000990894	-0.00672775	-0.00308224	0.0262137	-0.00465487	-0.00872606	-0.00452897	0.00253672	-0.0196331	-0.000361276	-0.00624761	-0.00892854	-0.00236213	-0.00101919	-0.00817045	0.00964281	6.87463e-06	0.00103156	-0.00207694	0.00430636	-0.00173355
AC1-H8	-0.10189	0.0239435	0.0216555	-0.0326564	-0.0819407	-0.0559121	0.00768391	-0.0655922	-0.0119016	0.0192902	-0.00766218	-0.022042	0.00913138	-0.0285245	0.0486758	0.00222683	-0.0227096	0.0373998	0.00314452	-0.0391272	-0.0128366	0.00974504	0.0178226	0.0145544	0.0193615	0.00389726	0.00946004	-0.00282046	0.0123154	0.0132422	-0.0107492	-0.0161686	0.0179116	-0.0170488	-0.0147173	0.0133976	-0.0231786	0.0097774	0.0040767	-0.00463194	-0.0144319	0.0257522	-0.00741139	-0.00465357	-0.00268924	0.0148833	-0.00265689	-0.000909297	0.00134503
AC10-D3	-0.0957473	-0.0535206	-0.00426799	-0.00677927	0.0400603	0.113366	-0.0431311	-0.032876	0.0400519	-0.010323	0.0549686	0.0106982	0.0027499	-0.0287174	-0.00649103	0.0106329	0.0432668	0.000326133	-0.00294798	0.00662776	-0.00509939	0.0328181	-0.000468104	0.00590284	-0.00586403	-0.00106673	0.00368436	0.0116708	-0.0091228	-0.00654337	0.0338754	-0.0117567	-0.0169218	-0.0195	0.0024008	0.0048179	0.0167516	0.0106864	0.0132858	0.000774471	0.00896967	-0.00777307	0.00261152	-0.00680662	-0.00657679	-0.0136395	-0.0064431	0.000660604	8.71157e-05
[truncated: 91 more rows]
[truncated: 44 more columns]

## Sheet: Sterile weighted unifrac DM
	AC1-D3	AC1-D5	AC1-H8	AC10-D3	AC2-D3	AC2-D7	AC4-D3	AC5-D3	AC5-H8	AC6-D3	AC7-D7	AC7-H8	AC8-D3	AC8-D5	AC9-D3	AT2-D5	AT6-H8	AT9-D5	CS1-H0	CS10-H0	CS3-H0	CS5-H0	CS7-H0	AC1-D7	AC10-D5	AC10-D7	AC9-H8	AT5-D7	CS8-H0	TS3-H0	AC2-H8	AC3-H8	AC6-D7	AC8-D7	AT4-H8	AT8-D5	AT8-H8	CS6-H0	TS2-H0	TS8-H0	AC3-D3	AC3-D5	AC4-H8	AC5-D7	AT1-D3	AT3-H8	CS9-H0	AT4-D7	AT9-D3
[truncated: 93 more rows]
[truncated: 44 more columns]

[truncated: 1 more sheets: Sterile weighted unifrac PC]
